# Supplementary material for: Associations of weight-adjusted-waist index and depression with secondary infertility
Source: Front Endocrinol (Lausanne). 2024 Mar 7;15:1330206. doi: 10.3389/fendo.2024.1330206 (PMC10956697; doi:10.3389/fendo.2024.1330206)
Supplement: Supplementary file 1 [file Table_1.xlsx]

## Sheet: zong_sleep_update
SEQN	GENDER	AGE	RACE	EDUCATION	MARITAL	FAMILY.INCOME	Height(cm)	WEIGHT..KG.	BMI	WAIST.CIRCUMFERENCE..CM.	ABSI	TRIGLYCERIDE..MG.DL.	HDL.CHOLESTEROL..MG.DL.	LDL.CHOLESTEROL.MG.DL.	TOTAL.CHOLESTEROL..MG.DL.	LYMPHOCYTE.NUMBER	SEGMENTED.NEUTROPHILS.NUMBER	PLATELET.COUNT	TOTAL.PROTEIN..G.DL.	DRINK.ALCOHOLIC	EVER.BREASTFED	AGE.STOPPED.BREASTFEED.DAYS.	DIABETES	EVER.BEEN.PREGNANT	HOW.MANY.TIMES.HAVE.BEEN.PREGNANT	DURING.PREGNANCY..TOLD.YOU.HAVE.DIABETES	INFERTILITY	MINUTES.SEDENTARY.ACTIVITY	DEPRESSION.SCORE	DEPRESSION1	DEPRESSION2	DEPRESSION3	DEPRESSION4	DEPRESSION5	DEPRESSION6	DEPRESSION7	DEPRESSION8	DEPRESSION9	DEPRESSION10	ALCOHOL.ALL.	ALCOHOL.1.	ALCOHOL.2..	VITAMIN.B12.ALL.	VITAMIN.B12.1..	VITAMIN.B12.2.	VITAMIN.B6.ALL.	VITAMIN.B6.1.	VITAMIN.B6.2.	CAROTENE.ALL.
77239	2	36	3	1	3	1	162.233	184.5	70.1	152.2	0.702856	76	45	122	182	2.1	5.5	326	7.4	1	NA	NA	2	1	3	2	1	240	NA	1	3	0	1	0	1	0	0	0	2	NA	0	0	NA	3.61	3.36	NA	1.387	1.901	NA
82389	2	34	3	4	3	1	151.731	155.4	67.5	172.5	0.844727	203	48	127	216	2.3	9.1	287	7.9	1	NA	NA	2	1	2	2	0	360	NA	1	1	2	1	1	0	2	0	0	1	NA	0	0	NA	3.62	1.93	NA	2.221	1.256	NA
113391	2	37	1	1	1	1	159.944	171.4	67	178	0.853204	81	44	93	153	2.1	4.9	277	7.3	1	NA	NA	2	1	5	2	1	30	NA	0	1	2	2	0	0	0	0	0	0	NA	0	0	NA	1.55	4.03	NA	0.81	1.204	NA
111982	2	25	4	4	1	3	160.249	170	66.2	143.5	0.692706	NA	58	NA	169	1.8	4.3	278	6.4	0	NA	NA	2	1	3	2	0	660	NA	0	0	0	1	0	0	0	0	0	0	NA	0	0	NA	2.43	3.46	NA	0.806	1.908	NA
114712	2	39	5	4	3	1	162.119	171.1	65.1	163.8	0.794955	125	35	96	156	2.3	5	247	7.6	1	NA	NA	2	1	4	2	0	1080	NA	0	0	0	0	0	0	3	0	0	0	NA	0	0	NA	5.46	2.66	NA	1.854	1.551	NA
117648	2	43	4	4	1	1	162.199	168.9	64.2	164.9	0.807558	NA	64	NA	183	2.2	4.7	246	7.2	1	NA	NA	3	1	6	2	0	900	NA	1	0	1	1	0	0	1	1	0	0	NA	0	0	NA	2.06	2.07	NA	2.386	1.059	NA
122322	2	39	3	4	1	1	167.99	179.2	63.5	162.3	0.786735	51	40	63	113	2	7.9	350	6.9	1	NA	NA	2	1	4	2	0	240	NA	0	0	2	1	0	0	0	0	0	0	NA	0	NA	NA	2.47	NA	NA	0.995	NA	NA
116490	2	36	3	2	1	1	160.441	163.2	63.4	166	0.824247	NA	38	NA	187	2.4	4.1	263	6.6	1	NA	NA	1	1	1	2	1	360	NA	0	1	1	1	0	1	0	0	0	1	NA	0	0	NA	1.53	0.28	NA	0.54	0.455	NA
122516	2	45	4	2	1	1	164.917	170.8	62.8	145.5	0.717119	NA	37	NA	154	2.4	3.8	419	7.8	1	NA	NA	2	1	9	2	0	420	NA	0	0	0	0	0	0	2	0	0	0	NA	0	0	NA	5.53	2.76	NA	1.51	1.639	NA
116675	2	42	4	5	2	2	162.245	161.1	61.2	133.6	0.675387	NA	67	NA	176	1.6	5.3	348	7.4	1	NA	NA	2	1	2	2	0	300	NA	0	0	2	1	1	0	1	0	0	0	NA	28.1	0	NA	0.72	5.88	NA	0.592	2.211	NA
80525	2	34	4	3	1	1	168.057	172	60.9	160.8	0.801334	98	49	133	202	2.9	8.5	321	8.1	3	NA	NA	3	1	6	1	0	720	NA	2	0	1	3	2	2	2	2	0	2	NA	0	0	NA	3.17	3.3	NA	0.771	2.317	NA
86212	2	32	1	3	2	1	156.254	148.2	60.7	146.7	0.759841	NA	51	NA	208	3.2	3.5	224	6.9	1	NA	NA	2	1	5	2	0	180	NA	0	0	0	1	1	0	0	0	0	0	NA	0	0	NA	5.23	1.85	NA	1.122	0.546	NA
84396	2	38	1	3	1	1	154.724	142.2	59.4	160.2	0.84598	NA	47	NA	162	3.2	9.6	307	6.8	1	NA	NA	1	1	2	1	1	420	NA	1	0	2	2	0	1	0	0	0	0	NA	0	0	NA	5.81	2.77	NA	1.659	0.735	NA
122893	2	45	4	4	1	1	161.015	154	59.4	157.3	0.814275	92	51	92	161	1.7	6.7	257	6.6	0	NA	NA	2	1	3	2	0	240	NA	0	0	0	1	0	0	0	0	0	0	NA	0	0	NA	3.89	6.77	NA	0.995	2.059	NA
109728	2	34	3	1	2	1	163.196	157.4	59.1	154.9	0.799169	98	44	108	172	1.7	4.2	358	6.9	0	NA	NA	2	1	9	2	0	120	NA	1	1	1	1	1	0	1	0	0	1	NA	0	NA	NA	7.6	NA	NA	2.218	NA	NA
74624	2	37	4	3	3	1	165.434	161.2	58.9	148.4	0.762157	134	44	115	186	3.1	3	351	7.1	0	NA	NA	2	1	6	2	0	240	NA	1	0	0	1	1	0	0	0	0	0	NA	0	0	NA	6.33	1.45	NA	3.613	1.678	NA
73855	2	38	3	4	2	1	152.957	137.1	58.6	150.5	0.806591	NA	46	NA	143	3.3	9.6	292	7.5	1	NA	NA	1	1	2	2	0	600	NA	2	2	0	3	0	3	0	0	1	2	NA	43.2	0	NA	1.02	4.73	NA	2.658	1.496	NA
80562	2	22	4	4	3	1	161.149	150.1	57.8	165.5	0.8721	NA	39	NA	123	2.5	5.1	266	7.2	3	NA	NA	2	1	3	2	0	840	NA	0	0	3	3	2	0	0	0	0	0	NA	0	0	NA	16.67	0	NA	6.95	0.878	NA
115742	2	41	4	3	2	1	164.586	156.3	57.7	153.2	0.799734	NA	42	NA	138	2.3	3.6	311	6.5	1	NA	NA	2	1	4	2	0	180	NA	0	0	0	0	0	0	0	0	0	NA	NA	0	0	NA	3.95	7.26	NA	1.319	3.384	NA
80034	2	39	3	3	2	1	179.43	184.8	57.4	164.2	0.823792	NA	48	NA	140	2.8	5.6	286	6.4	1	NA	NA	2	1	1	2	0	900	NA	0	0	0	0	1	0	0	0	0	0	NA	0	0	NA	5.52	4.61	NA	1.73	1.373	NA
116159	2	41	3	5	1	1	167.636	159.9	56.9	148.6	0.775818	103	51	83	155	2.5	5.3	331	6.8	1	NA	NA	2	1	4	2	0	720	NA	2	0	2	2	0	0	0	0	0	0	NA	0	0	NA	27.94	15.4	NA	10.591	6.368	NA
84493	2	44	4	3	2	1	164.965	154.3	56.7	160	0.844051	NA	67	NA	175	2.8	3	256	6.7	1	NA	NA	1	1	4	2	0	480	NA	0	0	0	1	0	0	0	0	0	0	NA	0	0	NA	6.22	4.35	NA	1.243	1.324	NA
123604	2	42	3	4	1	1	158.95	143	56.6	134.2	0.722068	NA	49	NA	221	2.1	4.5	228	6.7	1	NA	NA	2	1	2	2	0	240	NA	0	0	2	1	0	0	1	0	0	0	NA	0	0	NA	2.73	11.35	NA	0.838	3.183	NA
84825	2	41	4	4	1	1	159.843	144.1	56.4	141	0.758322	NA	45	NA	158	1.7	2.8	308	7.2	1	NA	NA	2	1	4	2	0	120	NA	3	0	1	3	2	0	1	1	0	0	NA	0	0	NA	5.32	2.98	NA	2.892	3.465	NA
122338	2	34	4	1	3	3	172.333	167.5	56.4	144	0.745863	157	33	68	132	3.3	4.7	230	7.3	1	NA	NA	1	1	5	2	1	360	NA	1	1	2	1	1	1	1	0	1	0	NA	149.6	0.2	NA	2.3	6.92	NA	1.413	2.834	NA
90081	2	45	3	4	3	1	173.461	169.4	56.3	169.6	0.876635	NA	NA	NA	NA	NA	NA	NA	NA	1	NA	NA	2	1	2	2	1	600	NA	0	0	0	1	1	0	0	0	0	0	NA	0	0	NA	2.31	6.8	NA	1.374	2.289	NA
82660	2	32	3	4	1	1	174.838	172.1	56.3	143.4	0.738287	74	40	111	166	1.5	3.9	266	7.1	0	NA	NA	2	1	3	2	1	120	NA	0	0	0	0	0	0	0	0	0	NA	NA	0	0	NA	7.28	4.01	NA	1.653	3.237	NA
114790	2	31	3	4	3	3	177.54	176.2	55.9	143	0.734085	NA	40	NA	194	4	7.5	335	7	1	NA	NA	2	1	3	2	1	540	NA	2	1	3	2	1	2	0	1	0	2	NA	0	0	NA	2.53	3.82	NA	1.031	0.69	NA
91475	2	24	2	3	1	1	152.87	129.7	55.5	150.6	0.837146	NA	33	NA	145	2.2	7	376	7.1	1	NA	NA	2	1	2	2	0	180	NA	0	2	3	0	0	3	1	1	2	1	NA	0	0	NA	3.77	4.25	NA	0.924	1.65	NA
88480	2	22	5	4	3	1	171.055	162.1	55.4	152.2	0.800768	NA	48	NA	145	3.6	8.3	282	6.4	1	NA	NA	2	1	2	2	0	420	NA	1	1	0	0	0	1	0	0	0	0	NA	69.3	0	NA	4.36	3.4	NA	1.321	1.476	NA
78827	2	42	4	4	3	1	153.327	129.3	55	156	0.871112	NA	56	NA	175	2.3	3.6	175	7.1	1	NA	NA	2	1	4	2	0	240	NA	0	0	0	0	0	0	0	0	0	NA	NA	0	0	NA	1.26	0.41	NA	1.602	0.641	NA
75640	2	22	3	3	1	1	155.739	133.4	55	151.9	0.841623	NA	55	NA	193	1.9	8.6	263	7.2	3	NA	NA	2	1	1	2	0	180	NA	0	0	0	0	0	0	0	0	0	NA	NA	0	0	NA	1.14	1.2	NA	1.009	0.677	NA
117146	2	34	4	3	3	1	170.219	158.2	54.6	152.7	0.813218	NA	44	NA	138	3.6	1.9	335	7.1	1	NA	NA	2	1	1	2	1	240	NA	0	0	1	1	1	0	0	1	0	0	NA	16.4	0	NA	5.75	5.04	NA	1.82	2.803	NA
86649	2	32	1	3	1	1	163.413	144.2	54	132.2	0.723868	NA	36	NA	165	1.9	8.6	255	7.4	1	NA	NA	2	1	3	2	0	780	NA	0	0	0	0	0	0	0	0	0	NA	NA	0	0	NA	3.45	1.66	NA	2.294	1.715	NA
123316	2	38	3	4	3	1	165.227	146.6	53.7	133.6	0.730214	NA	38	NA	171	2.4	5.8	304	7.1	1	NA	NA	2	1	2	2	0	720	NA	2	2	1	1	1	1	1	0	0	1	NA	0	0	NA	7.1	6.38	NA	3.267	1.687	NA
87942	2	32	4	3	3	1	157.012	131.4	53.3	136.4	0.768592	27	57	59	121	2.4	1.9	287	7.4	0	NA	NA	2	1	6	2	0	360	NA	0	0	0	1	0	0	0	0	0	0	NA	0	0	NA	2.75	1.64	NA	0.379	0.987	NA
122851	2	31	4	3	3	1	157.757	132.4	53.2	144.6	0.813891	NA	40	NA	166	2.6	5.2	302	7.2	1	NA	NA	2	1	2	2	0	720	NA	0	0	0	0	0	0	0	0	0	NA	NA	0	0	NA	0.39	0.59	NA	0.319	0.135	NA
110041	2	44	5	4	1	1	148.045	116.6	53.2	122.4	0.711176	NA	46	NA	242	4.3	7.4	387	6.4	1	NA	NA	2	1	4	2	0	900	NA	1	0	0	1	1	0	0	0	0	0	NA	0	0	NA	3.75	4.38	NA	1.664	0.68	NA
123342	2	35	3	5	1	1	167.456	148.9	53.1	144.6	0.790961	85	33	100	150	2	5.2	310	6.7	1	NA	NA	2	1	10	1	0	360	NA	1	1	3	3	3	0	3	3	0	1	NA	0	0	NA	0.53	0.22	NA	2.466	1.169	NA
91211	2	40	1	4	3	1	168.438	149.8	52.8	149.2	0.816821	NA	39	NA	206	4.1	6.2	348	7.6	1	NA	NA	1	1	6	2	0	480	NA	3	1	0	1	1	0	0	0	0	0	NA	NA	NA	NA	NA	NA	NA	NA	NA	NA
115060	2	21	1	4	1	1	165.145	144	52.8	134.9	0.74586	NA	42	NA	158	2.4	5.6	318	6.8	1	NA	NA	2	1	1	2	0	120	NA	1	1	3	2	1	2	0	0	0	1	NA	0	0	NA	0.99	1.44	NA	0.918	1.284	NA
116306	2	25	5	4	3	1	172.047	155.4	52.5	142	0.772134	NA	30	NA	147	3.2	5.2	373	7.4	1	NA	NA	2	1	1	2	0	300	NA	0	0	1	1	0	0	0	0	0	0	NA	13.4	0	NA	4.5	4.89	NA	2.313	3.081	NA
75531	2	37	3	2	1	1	168.966	149.6	52.4	149.1	0.819137	186	36	150	223	2.1	4.8	304	7	1	NA	NA	3	1	3	2	0	480	NA	2	1	3	3	1	2	3	2	0	1	NA	0.1	0	NA	5.86	8.83	NA	2.331	3.943	NA
114375	2	31	5	4	3	1	167.023	145.9	52.3	152.2	0.84209	NA	NA	NA	NA	NA	NA	NA	NA	1	NA	NA	2	1	5	2	0	600	NA	0	0	0	0	1	0	0	0	0	0	NA	14.4	38.2	NA	3.75	0.86	NA	1.756	1.337	NA
115953	2	34	3	4	3	1	175.84	161.4	52.2	153.3	0.827695	NA	35	NA	229	2.8	5.6	264	7.8	1	NA	NA	2	1	5	2	0	360	NA	0	0	0	1	0	0	0	0	0	0	NA	0	0	NA	8.73	3.44	NA	2.843	1.288	NA
110406	2	31	4	4	3	1	158.449	130.3	51.9	121.4	0.693154	63	55	125	193	2.9	2.9	332	7.1	1	NA	NA	2	1	2	2	0	720	NA	0	0	1	1	0	0	0	0	0	0	NA	0	0	NA	1.73	0.91	NA	1.205	1.634	NA
123636	2	32	1	3	1	2	167.078	144.6	51.8	136.6	0.760509	224	32	104	181	3.3	4.8	255	6.9	1	NA	NA	3	1	2	2	0	420	NA	0	0	0	0	1	0	0	0	0	0	NA	0	NA	NA	7.44	NA	NA	2.564	NA	NA
76602	2	40	4	4	3	1	174.378	156.6	51.5	149.5	0.817881	NA	47	NA	184	2.7	4.4	244	6.8	1	NA	NA	2	1	1	2	0	600	NA	0	0	0	0	0	0	0	0	0	NA	NA	NA	NA	NA	NA	NA	NA	NA	NA	NA
81894	2	32	4	3	1	1	158.237	128.7	51.4	138.3	0.795291	54	40	115	166	2.6	3.6	355	7.5	1	NA	NA	2	1	3	2	0	420	NA	0	0	1	1	2	0	0	0	0	0	NA	0	0	NA	0.22	2.08	NA	0.64	1.651	NA
109805	2	43	4	3	1	1	161.015	133	51.3	137.6	0.785428	65	59	95	167	1.4	4.9	457	7.1	1	NA	NA	2	1	3	2	0	540	NA	0	0	0	0	0	0	0	0	0	NA	NA	0	0	NA	2.95	1.14	NA	1.785	0.552	NA
82902	2	41	3	5	1	2	167.391	142.9	51	141.2	0.793577	NA	NA	NA	NA	1.5	4.6	180	NA	1	NA	NA	2	1	3	2	0	240	NA	0	1	0	2	2	0	0	0	0	0	NA	15.9	31.8	NA	7.7	1.24	NA	2.939	1.667	NA
122110	2	43	3	2	1	1	163.059	135.6	51	137.2	0.781271	NA	44	NA	179	3.2	6.7	382	7.4	0	NA	NA	2	1	3	2	1	480	NA	0	1	2	1	1	3	0	0	1	1	NA	0	0	NA	3.43	2.21	NA	1.502	1.633	NA
92423	2	37	1	4	3	1	158.269	127.5	50.9	141.6	0.819508	NA	33	NA	156	3	6.4	224	7.6	1	NA	NA	2	1	11	2	1	180	NA	2	1	3	2	1	2	0	1	0	1	NA	0	0	NA	4.91	4.01	NA	1.051	0.744	NA
89241	2	44	4	5	2	2	162.534	134.2	50.8	137.4	0.785728	159	45	121	198	1.8	3.2	276	8.3	1	NA	NA	2	1	2	2	0	720	NA	0	0	1	1	0	0	0	0	0	0	NA	133.6	NA	NA	2.13	NA	NA	1.615	NA	NA
75389	2	43	4	3	3	1	160.681	130.9	50.7	141.4	0.814319	85	46	141	204	2.9	3.3	345	6.4	1	NA	NA	2	1	4	2	0	480	NA	0	0	0	0	0	0	0	0	0	NA	NA	0	0	NA	4.22	0.79	NA	2.744	0.801	NA
113868	2	37	3	2	2	1	169.464	145.6	50.7	144	0.807518	644	29	NA	184	2.1	3.9	166	7.2	0	NA	NA	1	1	7	2	1	600	NA	1	1	3	3	3	1	3	0	0	1	NA	0	0	NA	6.32	1.79	NA	2.618	1.557	NA
123898	2	26	3	4	1	1	168.462	143.6	50.6	138.3	0.778881	NA	71	NA	255	3.4	9.2	254	6.4	1	NA	NA	2	1	2	2	0	300	NA	0	0	0	0	1	0	0	0	0	0	NA	0	0	NA	1.87	4.08	NA	1.279	2.829	NA
81174	2	31	4	5	1	1	168.629	143.6	50.5	149.4	0.842088	NA	63	NA	135	2.4	3.2	264	7.5	0	NA	NA	2	1	2	2	1	600	NA	0	0	0	1	0	0	0	0	0	0	NA	0	0	NA	5.3	6.66	NA	4.96	3.79	NA
119882	2	26	4	4	1	1	170.439	146.7	50.5	147.8	0.828633	36	60	79	146	2.7	5.4	278	7.3	1	NA	NA	2	1	1	2	0	240	NA	1	1	1	1	1	1	0	0	0	1	NA	0	0	NA	8.38	4.02	NA	2.535	2.256	NA
77787	2	44	1	4	1	1	161.674	132	50.5	138.9	0.799565	NA	42	NA	185	2.4	7.4	284	7	3	NA	NA	2	1	9	2	0	960	NA	0	0	3	3	3	1	3	3	0	3	NA	0	0	NA	0.57	4.86	NA	2.84	1.896	NA
119579	2	29	4	5	3	3	157.329	125	50.5	133	0.776103	NA	34	NA	157	3.8	5.3	382	7.1	1	NA	NA	2	1	3	2	0	480	NA	0	0	0	0	0	0	0	0	0	NA	NA	0	0	NA	3.26	7.53	NA	1.331	2.246	NA
76148	2	32	4	5	3	1	153.765	119.4	50.5	125.6	0.741368	50	52	85	147	3	4	189	6.5	1	NA	NA	2	1	1	2	0	480	NA	0	0	1	1	1	0	1	0	0	0	NA	37	0	NA	0.42	3.54	NA	0.708	4.176	NA
79284	2	34	2	3	3	1	166.147	138.3	50.1	128.5	0.733554	91	56	130	204	2	6.8	226	7.6	3	NA	NA	2	1	1	2	0	840	NA	1	0	0	1	0	0	0	0	0	0	NA	0	0	NA	0.68	0.25	NA	0.565	0.201	NA
83376	2	43	4	5	1	1	161.741	130.8	50	140.8	0.81573	82	55	98	169	1.4	3	330	7.7	3	NA	NA	2	1	2	1	1	840	NA	1	1	0	1	1	1	1	0	1	1	NA	0	0	NA	1.74	0.51	NA	0.61	1.083	NA
81069	2	26	3	3	2	1	168.454	141.6	49.9	144.8	0.823116	87	39	112	168	1.7	6.2	263	6.8	1	NA	NA	2	1	3	3	0	420	NA	1	1	2	1	1	2	0	1	0	0	NA	0	0	NA	1.23	3.05	NA	1.225	0.99	NA
83993	2	41	4	3	1	1	156.454	121.9	49.8	141	0.832797	NA	52	NA	255	4.8	6.4	302	7.6	1	NA	NA	2	1	1	2	1	240	NA	0	0	2	2	2	0	0	0	0	0	NA	17.4	0	NA	5.02	4.16	NA	3.207	1.495	NA
113451	2	45	4	3	2	1	157.478	123.5	49.8	136.4	0.803006	104	54	144	219	2.2	5.6	290	7.8	1	NA	NA	2	1	3	1	0	600	NA	1	1	2	3	3	1	1	1	0	2	NA	0	0	NA	5.07	2.96	NA	1.235	2.433	NA
88536	2	35	4	4	1	1	160.133	127.7	49.8	131.2	0.765962	NA	36	NA	230	3	3.7	435	6.4	1	NA	NA	1	1	2	1	0	180	NA	2	0	2	3	2	0	0	0	0	0	NA	22.3	NA	NA	4.67	NA	NA	0.865	NA	NA
110374	2	45	4	4	3	1	153.366	116.9	49.7	146.8	0.876915	NA	41	NA	154	3.4	8.1	327	7.4	1	NA	NA	2	1	5	1	0	600	NA	0	0	1	1	1	0	0	0	0	0	NA	0	0	NA	1.04	3.13	NA	0.749	1.504	NA
115398	2	38	4	4	1	1	150.671	112.6	49.6	128.2	0.773665	NA	66	NA	180	3.3	2.9	301	6.9	0	NA	NA	2	1	4	2	0	420	NA	0	0	0	1	0	0	0	0	0	0	NA	0	0	NA	1.8	6.77	NA	1.482	3.172	NA
80109	2	33	3	5	1	1	155.737	120.3	49.6	130.3	0.773441	NA	61	NA	188	2	5	213	7	0	NA	NA	2	1	4	2	0	360	NA	0	0	1	1	1	0	0	0	0	0	NA	0	0	NA	2.19	1.08	NA	1.329	2.381	NA
91421	2	41	4	3	3	1	165.328	135.3	49.5	153	0.882636	NA	42	NA	221	3.5	2.8	209	7	1	NA	NA	2	1	7	2	0	480	NA	0	0	1	1	2	0	0	0	0	0	NA	0	33.3	NA	0.23	0.94	NA	1.189	0.756	NA
78079	2	40	5	4	2	1	163.423	132.2	49.5	147.9	0.858173	NA	42	NA	157	3.8	7.5	256	7.1	1	NA	NA	2	1	2	2	1	480	NA	2	1	3	3	3	3	0	3	0	1	NA	0	0	NA	2.15	4.22	NA	0.427	2.091	NA
90633	2	42	1	4	1	1	165.694	135.9	49.5	117.7	0.678244	150	39	114	183	2.6	4.9	297	6.8	1	NA	NA	2	1	7	2	0	600	NA	0	0	0	0	0	0	0	0	0	NA	NA	0	0	NA	11.49	5.59	NA	2.938	2.375	NA
117116	2	21	1	3	2	1	172.268	146.6	49.4	143	0.809251	131	36	82	144	3.1	8.9	320	6.8	1	NA	NA	2	1	2	2	1	300	NA	3	3	3	3	2	3	0	1	0	1	NA	0	63.1	NA	2.73	4.34	NA	0.874	2.531	NA
115253	2	39	4	3	3	1	163.568	131.9	49.3	146.3	0.850805	100	54	137	211	2.9	3.6	426	7.9	1	NA	NA	2	1	1	2	0	240	NA	1	1	0	0	0	0	0	0	0	0	NA	0	NA	NA	3.61	NA	NA	1.781	NA	NA
121671	2	34	4	3	3	1	166.137	135.8	49.2	137.5	0.794497	56	46	108	165	3.5	3.5	273	7	1	NA	NA	2	1	1	2	0	300	NA	0	0	0	1	0	0	0	0	0	0	NA	0	0	NA	1.43	0.72	NA	0.979	0.951	NA
87346	2	32	4	3	3	1	164.645	133.1	49.1	138.9	0.80731	NA	47	NA	132	2.7	4.8	296	7.2	1	NA	NA	2	1	3	2	0	240	NA	0	0	0	1	1	0	0	0	0	0	NA	0	NA	NA	0.5	NA	NA	0.146	NA	NA
110378	2	44	1	4	1	1	158.468	123.3	49.1	135.2	0.800974	98	47	110	177	1.7	3.4	261	6.6	3	NA	NA	2	1	3	2	0	360	NA	1	2	2	2	3	1	1	1	0	1	NA	0	0	NA	3.35	2.45	NA	1.453	4.021	NA
82748	2	43	4	4	3	1	160.992	127	49	130	0.765146	NA	43	NA	222	3.4	7	366	6.4	1	NA	NA	2	1	2	2	0	480	NA	1	1	0	3	3	0	0	0	0	0	NA	0	0	NA	1.97	0.89	NA	0.645	1.59	NA
115444	2	30	4	4	1	1	168.538	138.9	48.9	146	0.841005	54	48	110	169	2.6	4.5	249	7.6	3	NA	NA	2	1	1	2	0	360	NA	0	0	0	0	0	0	0	0	0	NA	NA	0	0	NA	1.26	3.43	NA	1.426	1.343	NA
119780	2	42	3	4	2	1	160.202	125.5	48.9	128.5	0.759213	212	43	112	197	2.8	4.7	273	7.1	1	NA	NA	2	1	3	2	0	540	NA	0	0	2	1	0	0	0	0	0	0	NA	0	0	NA	6.82	11.72	NA	1.913	3.526	NA
116163	2	37	3	3	1	1	161.726	127.9	48.9	118.9	0.699174	86	46	125	188	2.8	8.1	340	7.3	0	NA	NA	2	1	1	2	0	600	NA	0	0	1	0	0	0	1	0	0	0	NA	0	0	NA	3.29	0.59	NA	0.787	0.309	NA
112546	2	37	3	4	1	1	162.461	128.8	48.8	134	0.787259	NA	44	NA	231	3.5	4.4	376	6.6	1	NA	NA	2	1	5	2	0	900	NA	3	3	3	3	3	3	2	0	1	2	NA	0	0	NA	3.02	2.38	NA	2.773	1.818	NA
88000	2	43	1	2	1	1	160.658	125.7	48.7	139.4	0.824692	NA	39	NA	168	2.9	8.4	331	7.5	0	NA	NA	1	1	5	2	0	600	NA	1	1	3	3	1	3	3	1	0	1	NA	0	0	NA	1.43	6.79	NA	1.908	2.094	NA
91887	2	28	1	3	1	1	167.16	135.8	48.6	137.9	0.800892	NA	45	NA	156	3	4.8	282	7.2	3	NA	NA	2	1	3	1	0	180	NA	0	0	0	0	0	0	0	0	0	NA	NA	0	0	NA	3.65	2.67	NA	0.861	1.525	NA
88211	2	44	4	3	3	1	168.131	137.1	48.5	140.9	0.81707	NA	39	NA	173	3.7	6.3	390	7.8	0	NA	NA	2	1	2	2	0	360	NA	0	0	0	1	0	0	0	0	0	0	NA	0	0	NA	0.33	4.38	NA	0.676	1.105	NA
85118	2	45	3	4	1	1	154.746	115.9	48.4	137	0.829241	NA	40	NA	193	3.9	7.2	273	7.2	0	NA	NA	2	1	4	2	1	840	NA	0	0	2	0	0	0	0	0	0	0	NA	0	0	NA	0.49	0	NA	0.136	0.304	NA
118759	2	34	3	4	3	1	161.412	126.1	48.4	124	0.734893	123	25	115	165	2.8	5.6	182	6.8	1	NA	NA	2	1	1	2	0	180	NA	0	1	1	1	1	0	0	0	0	0	NA	0	0	NA	2.82	61.53	NA	1.328	0.76	NA
112382	2	32	3	3	1	1	163.194	128.9	48.4	121.6	0.716723	97	55	76	150	1.5	4.4	273	6.7	1	NA	NA	2	1	2	2	0	780	NA	0	0	0	0	0	0	0	0	0	NA	NA	0	0	NA	7.72	1.68	NA	3.935	1.023	NA
85859	2	35	3	5	1	1	164.733	130.8	48.2	142.1	0.835935	NA	47	NA	201	2.9	6.4	208	6.5	1	NA	NA	2	1	3	2	0	120	NA	0	0	0	0	0	0	0	0	0	NA	NA	0	0	NA	5.47	1.39	NA	2.095	1.709	NA
89183	2	24	1	4	1	1	149.342	107.5	48.2	133.6	0.825439	46	42	74	125	2.6	3.1	344	6.6	0	NA	NA	2	1	2	2	0	240	NA	0	1	0	1	0	1	0	0	0	0	NA	0	0	NA	2.16	1.94	NA	0.82	0.685	NA
121731	2	42	3	3	3	1	163.278	128.5	48.2	135.7	0.801834	238	30	114	192	1.7	4.7	313	7	0	NA	NA	2	1	4	2	0	180	NA	0	0	3	0	0	0	0	0	0	0	NA	0	0	NA	4.72	2.59	NA	1.652	0.814	NA
113143	2	28	4	4	1	1	162.322	127	48.2	125.2	0.741966	NA	NA	NA	NA	1.9	3.3	181	NA	1	NA	NA	2	1	5	2	0	240	NA	0	0	1	1	0	0	0	0	0	0	NA	23	0	NA	6.19	3.62	NA	4.18	3.617	NA
86802	2	30	4	4	1	1	169.075	137.5	48.1	130.4	0.758243	NA	40	NA	145	2.6	2.9	344	6.7	0	NA	NA	2	1	3	2	0	300	NA	0	0	0	0	0	0	0	0	0	NA	NA	0	0	NA	1.31	0.05	NA	0.464	0.15	NA
121532	2	27	2	3	3	3	153.865	113.4	47.9	127	0.776266	NA	NA	NA	NA	NA	NA	NA	NA	1	NA	NA	2	1	3	1	0	348	NA	0	0	0	0	0	0	0	0	0	NA	NA	0	0	NA	1.68	1.8	NA	1.084	0.749	NA
111708	2	44	3	4	2	1	160.086	122.5	47.8	136.3	0.8179	NA	43	NA	178	3.3	5.8	290	7.3	1	NA	NA	1	1	6	1	0	300	NA	2	2	2	3	2	2	3	2	0	3	NA	0	NA	NA	4.28	NA	NA	0.506	NA	NA
90586	2	24	4	4	1	1	160.933	123.8	47.8	132	0.790009	NA	72	NA	185	2.4	4.7	265	6.8	1	NA	NA	2	1	3	2	0	960	NA	1	0	0	2	3	0	2	0	0	0	NA	0	0	NA	5.64	4.17	NA	1.388	0.89	NA
92363	2	27	4	3	3	1	169.913	138	47.8	134.7	0.784578	54	55	101	167	2.1	3	256	7.1	1	NA	NA	2	1	1	2	0	300	NA	3	3	0	2	3	2	3	0	0	1	NA	0	0	NA	1.98	6.43	NA	0.952	1.466	NA
79215	2	28	5	4	1	1	171.685	140.6	47.7	145.2	0.842534	NA	76	NA	258	1.5	8	201	5.4	1	NA	NA	2	1	1	2	1	300	NA	0	2	1	3	3	2	0	0	0	1	NA	0	0	NA	3.57	1.16	NA	1.403	1.085	NA
93535	2	31	2	2	1	1	160.842	123.4	47.7	132.7	0.795535	NA	54	NA	172	2.5	4.4	284	7.1	0	NA	NA	2	1	3	1	0	180	NA	0	0	0	0	0	0	0	0	0	NA	NA	0	0	NA	2.07	1.42	NA	0.394	1.233	NA
113504	2	30	4	3	3	1	166.274	131.6	47.6	132.3	0.781165	32	50	80	136	1.8	4	251	7.2	1	NA	NA	2	1	6	2	0	360	NA	0	0	0	0	0	0	0	0	0	NA	NA	0	0	NA	7.47	3.86	NA	2.125	1.059	NA
83959	2	22	3	4	3	1	162.891	126.3	47.6	129.7	0.773724	NA	41	NA	198	1.8	3.6	273	6.5	3	NA	NA	1	1	1	2	0	900	NA	0	1	1	1	1	0	0	0	0	0	NA	0	0	NA	4.43	2.76	NA	0.825	1.678	NA
119871	2	39	4	2	1	1	164.048	128.1	47.6	127	0.754942	108	43	124	189	3.1	7	540	8	3	NA	NA	1	1	2	2	0	360	NA	1	1	1	3	2	1	1	1	0	1	NA	0	NA	NA	4.66	NA	NA	1.835	NA	NA
113386	2	24	4	3	3	1	160.498	122.1	47.4	114	0.687045	97	55	130	204	1.3	2.3	215	7.7	1	NA	NA	2	1	4	2	0	600	NA	0	0	1	1	0	0	0	0	0	0	NA	0	0	NA	1.9	0.63	NA	1.529	0.422	NA
124473	2	44	4	2	3	1	149.134	105.2	47.3	122.1	0.764457	24	52	89	146	0.5	3.6	232	7.3	0	NA	NA	1	1	2	1	0	360	NA	0	0	3	0	0	0	0	1	0	0	NA	0	0	NA	3.22	0.64	NA	0.63	0.396	NA
89774	2	32	3	5	1	1	168.052	133.3	47.2	130.4	0.770184	120	39	120	183	1.7	4.5	204	7	1	NA	NA	2	1	3	1	0	180	NA	0	0	0	1	0	0	0	0	0	0	NA	0	NA	NA	3.74	NA	NA	1.653	NA	NA
78203	2	44	5	4	3	1	164.207	127	47.1	138	0.825726	58	51	140	203	3	5.9	245	7.5	3	NA	NA	2	1	2	2	1	720	NA	1	0	0	1	0	0	0	0	0	1	NA	0	0	NA	2.24	0.54	NA	1.712	1.518	NA
112235	2	40	4	4	2	1	159.684	120.1	47.1	131.1	0.795472	68	49	94	157	3.1	7.1	335	7.8	1	NA	NA	2	1	5	2	0	240	NA	2	2	2	1	0	2	1	0	0	1	NA	0	0	NA	7.74	7.67	NA	4.878	3.27	NA
122619	2	31	3	4	1	1	161.575	122.7	47	126.1	0.761722	NA	66	NA	218	2.5	6.4	321	7.5	1	NA	NA	2	1	1	2	1	360	NA	0	0	0	0	0	0	0	0	0	NA	NA	0	0	NA	2.85	2.49	NA	1.38	1.936	NA
111651	2	39	4	3	1	3	164.446	127.1	47	117.6	0.704147	NA	NA	NA	NA	NA	NA	NA	NA	1	NA	NA	2	1	4	2	0	60	NA	0	0	0	0	0	0	0	0	0	NA	NA	0	0	NA	0.99	11.44	NA	0.566	2.116	NA
113478	2	31	4	3	3	1	142.473	95.2	46.9	126.2	0.812977	NA	74	NA	155	2.8	4.1	273	6.8	1	NA	NA	2	1	1	2	1	720	NA	1	1	1	1	2	1	1	0	0	1	NA	46.2	54.1	NA	4.34	0.5	NA	2.802	0.664	NA
123435	2	35	2	4	3	1	171.781	138.1	46.8	133.5	0.784327	202	46	169	255	2.3	4.9	254	7.3	1	NA	NA	2	1	3	2	0	5	NA	1	0	2	1	3	0	0	3	0	3	NA	NA	NA	NA	NA	NA	NA	NA	NA	NA
82342	2	25	4	4	3	1	175.36	143.3	46.6	147	0.857225	NA	38	NA	151	1.9	2.2	260	7	1	NA	NA	2	1	1	2	0	480	NA	0	0	1	1	1	0	0	0	0	0	NA	0	0	NA	3.56	4.14	NA	2.274	1.537	NA
81506	2	22	3	4	1	1	159.268	117.7	46.4	126.6	0.776886	162	42	140	214	3.1	3.6	283	6.8	0	NA	NA	2	1	2	2	0	300	NA	2	2	1	1	2	2	3	1	0	1	NA	0	0	NA	3.67	2.04	NA	0.69	1.026	NA
91566	2	25	3	4	1	1	148.048	101.7	46.4	116.7	0.742776	NA	51	NA	159	4.6	9.1	298	6.4	1	NA	NA	2	1	1	2	0	480	NA	0	0	0	1	1	0	0	0	0	0	NA	0	0	NA	3.76	6.92	NA	1.37	3.51	NA
90745	2	32	3	4	3	1	168.775	131.6	46.2	147.8	0.883608	179	47	90	173	3.1	7.1	264	7.2	1	NA	NA	1	1	1	2	0	720	NA	1	1	2	2	1	1	3	0	0	1	NA	0	0	NA	8.33	9.79	NA	4.687	2.542	NA
88380	2	41	2	4	1	1	149.168	102.8	46.2	125.7	0.799349	NA	NA	NA	NA	NA	NA	NA	NA	1	NA	NA	2	1	3	1	1	720	NA	0	0	0	1	0	0	0	0	0	0	NA	NA	NA	NA	NA	NA	NA	NA	NA	NA
78805	2	41	4	4	1	1	159.477	117.5	46.2	118.1	0.726339	NA	NA	NA	NA	NA	NA	NA	NA	3	NA	NA	2	1	3	2	0	180	NA	1	1	0	0	0	0	0	0	0	0	NA	0	0	NA	0.35	7.22	NA	1.096	1.528	NA
118369	2	42	4	4	3	1	172.515	137.2	46.1	133	0.787598	NA	31	NA	180	2.8	2.7	327	7.8	0	NA	NA	1	1	2	2	0	15	NA	1	1	1	1	1	0	0	0	0	3	NA	0	0	NA	1.57	2.11	NA	1.381	0.747	NA
84547	2	37	2	4	1	1	153.343	108.4	46.1	105.4	0.662025	NA	77	NA	187	2.9	8.2	172	7.1	3	NA	NA	2	1	4	2	0	180	NA	1	1	0	1	1	2	0	1	0	0	NA	0	NA	NA	0.12	NA	NA	0.996	NA	NA
117387	2	31	3	4	1	1	163.122	122.4	46	118.8	0.724528	NA	40	NA	194	3	6.8	373	7.2	1	NA	NA	2	1	2	2	0	300	NA	0	0	1	1	2	0	0	0	0	0	NA	12.4	0	NA	2.64	1.28	NA	0.96	0.762	NA
79434	2	22	5	4	3	1	171.752	135.4	45.9	143.3	0.852942	NA	60	NA	157	2.6	9.4	254	6.1	1	NA	NA	2	1	1	2	0	600	NA	0	1	0	1	0	1	1	0	0	0	NA	0	0	NA	1.76	3.88	NA	1.624	1.347	NA
84419	2	35	1	5	1	1	157.768	114	45.8	133.7	0.83153	NA	51	NA	168	3.8	10.5	368	7.2	1	NA	NA	2	1	3	2	0	600	NA	0	0	0	1	0	0	0	0	0	0	NA	0	0	NA	6.97	2.83	NA	2.277	2.585	NA
122044	2	41	5	4	1	1	158.596	115.2	45.8	127.3	0.789656	175	54	118	207	2.1	4.4	309	7.4	1	NA	NA	2	1	6	2	0	240	NA	0	0	1	1	1	0	0	0	0	0	NA	0	0	NA	2.41	3.71	NA	0.588	2.394	NA
77464	2	36	5	4	3	1	167.045	127.8	45.8	129.3	0.781517	NA	27	NA	194	4.4	8.1	491	6.4	1	NA	NA	1	1	8	2	0	480	NA	0	0	2	2	1	0	0	0	0	0	NA	0	0	NA	1.32	0	NA	1.735	0.113	NA
82719	2	35	5	4	1	1	158.114	114.5	45.8	125.6	0.780299	NA	22	NA	240	3.2	2.8	352	6.2	1	NA	NA	1	1	5	2	0	1080	NA	3	2	3	3	3	3	3	2	0	3	NA	0	0	NA	1.32	1.44	NA	0.292	0.408	NA
78247	2	24	1	2	1	1	168.661	130	45.7	139.5	0.840343	NA	34	NA	174	3.7	7.5	355	6.9	0	NA	NA	2	1	1	2	0	360	NA	0	0	1	0	1	0	0	0	0	0	NA	0	0	NA	0.47	2.21	NA	0.401	0.847	NA
82965	2	38	1	1	1	1	159.426	115.9	45.6	141.5	0.878012	NA	39	NA	195	3.4	6.4	214	7	0	NA	NA	2	1	4	1	0	480	NA	0	0	0	0	0	0	0	0	0	NA	NA	0	NA	NA	2.99	NA	NA	2.377	NA	NA
88890	2	21	3	1	1	1	165.434	124.8	45.6	143	0.871058	90	40	88	146	3.9	6.7	324	7.4	1	NA	NA	2	1	1	2	1	360	NA	0	0	1	3	0	0	0	0	0	0	NA	0	0	NA	2.87	2.14	NA	1.114	0.689	NA
92802	2	38	3	4	1	2	169.688	131.3	45.6	128	0.769854	NA	58	NA	201	2	3	240	7.2	3	NA	NA	2	1	9	1	0	180	NA	0	0	0	1	1	0	0	0	0	0	NA	NA	NA	NA	NA	NA	NA	NA	NA	NA
119383	2	34	3	5	1	2	161.313	118.4	45.5	131.6	0.81298	NA	69	NA	194	5.2	5.8	306	7.7	1	NA	NA	2	1	1	1	1	600	NA	0	0	1	1	0	0	0	0	0	0	NA	0	0	NA	3.27	0.43	NA	1.574	0.723	NA
123411	2	39	4	5	1	1	160.259	116.6	45.4	137.5	0.85347	83	48	73	138	2.3	4.4	359	6.6	3	NA	NA	2	1	3	1	0	420	NA	0	0	0	1	1	0	0	0	0	0	NA	NA	NA	NA	NA	NA	NA	NA	NA	NA
114034	2	45	3	4	1	1	154.948	109	45.4	115.7	0.73036	NA	59	NA	239	3	4.6	266	6.9	1	NA	NA	2	1	4	2	0	420	NA	0	0	0	3	2	0	0	0	0	0	NA	0	0	NA	7.32	14.34	NA	4.541	14.502	NA
80281	2	44	4	4	3	1	158.706	114.1	45.3	140.2	0.875761	NA	48	NA	160	3.8	8.3	346	7.3	1	NA	NA	2	1	5	2	0	600	NA	0	0	0	0	0	0	0	0	0	NA	NA	0	0	NA	1.59	0.71	NA	0.805	0.802	NA
84429	2	45	4	2	3	3	163.907	121.7	45.3	140	0.860527	NA	48	NA	151	3.7	4.2	183	7.5	1	NA	NA	2	1	3	2	0	360	NA	0	0	1	0	1	0	0	0	0	0	NA	NA	NA	NA	NA	NA	NA	NA	NA	NA
76641	2	42	3	5	1	1	167.438	127	45.3	133.5	0.811875	125	31	117	173	2.4	5.5	200	7.3	1	NA	NA	2	1	2	2	0	180	NA	0	1	2	2	3	1	0	0	0	0	NA	0	0	NA	8.41	4.64	NA	2.866	2.051	NA
80217	2	28	4	4	3	1	160.229	116.3	45.3	123.8	0.769635	43	69	73	151	3.3	3.1	242	7.1	1	NA	NA	2	1	2	2	0	420	NA	1	0	0	0	0	0	0	0	0	0	NA	0	0	NA	1.04	5.23	NA	0.943	1.122	NA
91630	2	29	1	2	1	1	163.885	121.4	45.2	139.5	0.858773	114	35	94	152	3	6.5	322	6.8	0	NA	NA	1	1	3	2	1	300	NA	0	0	2	2	0	0	0	0	0	0	NA	0	0	NA	7.96	6.96	NA	2.741	2.073	NA
91443	2	45	4	5	2	3	163.683	121.1	45.2	136.6	0.841441	72	36	122	172	3	7.1	364	6.8	1	NA	NA	2	1	6	2	0	960	NA	1	0	1	2	1	0	0	0	0	0	NA	0	0	NA	5.97	3.83	NA	1.566	1.22	NA
90121	2	44	3	5	1	1	163.818	121.3	45.2	126.8	0.780752	148	57	138	225	2	4.7	314	7.4	1	NA	NA	2	1	2	2	1	480	NA	0	0	0	1	0	0	0	0	0	0	NA	18.3	0	NA	5.49	4.24	NA	2.09	1.758	NA
74195	2	26	3	4	1	1	165.279	123.2	45.1	138.6	0.850884	59	34	95	141	1.7	5	213	7.1	1	NA	NA	2	1	5	2	0	180	NA	0	0	0	2	0	0	1	0	0	1	NA	0	0	NA	1.24	1.9	NA	0.455	2.409	NA
110411	2	39	3	4	1	1	169.125	129	45.1	135.5	0.82234	NA	58	NA	180	3	3.8	211	6.9	1	NA	NA	2	1	2	2	0	300	NA	1	1	1	1	1	1	1	0	0	0	NA	0	0	NA	3.23	2.09	NA	2.035	0.661	NA
92904	2	34	4	2	3	1	161.066	117	45.1	127.6	0.793531	NA	NA	NA	NA	NA	NA	NA	NA	1	NA	NA	2	1	2	2	0	240	NA	0	0	0	1	0	0	0	0	0	0	NA	0	0	NA	6.61	4.29	NA	1.554	1.35	NA
83459	2	31	3	5	1	1	161.89	118.2	45.1	118.2	0.733201	NA	NA	NA	NA	NA	NA	NA	NA	1	NA	NA	2	1	1	2	0	180	NA	0	0	0	0	0	0	0	0	0	NA	NA	0	NA	NA	7.89	NA	NA	3.191	NA	NA
118283	2	37	3	5	1	1	171.005	131.3	44.9	135.4	0.819627	113	41	114	178	2.6	8.2	366	6.8	1	NA	NA	1	1	2	2	1	480	NA	0	0	0	0	0	0	0	0	0	NA	NA	0	NA	NA	1.54	NA	NA	1.018	NA	NA
91477	2	35	1	4	1	1	152.485	104.4	44.9	124.2	0.796179	58	55	87	154	2.8	4.2	249	7	0	NA	NA	2	1	3	2	1	720	NA	1	0	2	3	3	0	0	0	0	0	NA	0	0	NA	0.87	1.56	NA	1.355	0.77	NA
80357	2	42	3	2	1	1	161.425	117	44.9	119.5	0.744536	50	57	77	144	1.2	3.2	295	6.4	1	NA	NA	2	1	2	2	0	120	NA	0	0	1	2	0	0	0	0	0	0	NA	0	0	NA	12.44	1.95	NA	4.193	0.982	NA
111431	2	40	3	3	1	3	168.248	127.1	44.9	115.6	0.705481	NA	35	NA	192	2.8	4.9	246	7.6	1	NA	NA	2	1	9	2	0	120	NA	0	0	0	0	0	0	0	0	0	NA	NA	0	0	NA	0.48	2.5	NA	0.15	1.414	NA
80305	2	32	4	4	3	3	163.39	119.6	44.8	131.1	0.813088	NA	39	NA	211	2.5	4.1	264	7.3	1	NA	NA	2	1	3	2	0	420	NA	0	0	0	1	3	0	0	0	0	0	NA	135.6	0	NA	1.92	1.49	NA	1.33	1.04	NA
112834	2	45	3	5	1	1	165.629	122.9	44.8	119.2	0.73427	NA	37	NA	177	3.1	5.9	275	6.9	1	NA	NA	2	1	8	2	1	780	NA	0	0	1	1	0	0	0	0	0	0	NA	0	0	NA	6.66	2.81	NA	2.538	1.108	NA
116333	2	36	3	4	1	1	168.955	127.6	44.7	140.5	0.858194	NA	48	NA	215	2.4	4.6	171	7.1	1	NA	NA	2	1	2	2	0	180	NA	1	0	3	1	0	0	0	0	0	0	NA	0	0	NA	3.64	5.54	NA	0.767	1.008	NA
109789	2	32	3	5	1	2	158.785	112.7	44.7	117.1	0.737816	NA	63	NA	182	3.6	5.5	196	7.5	1	NA	NA	2	1	2	2	0	240	NA	0	0	0	0	0	0	0	0	0	NA	NA	0	0	NA	2.51	1.24	NA	0.922	0.858	NA
119192	2	44	4	5	2	2	142.684	90.8	44.6	127.8	0.85072	NA	78	NA	179	2.6	3.6	309	7	1	NA	NA	2	1	1	2	0	240	NA	1	1	3	2	1	3	3	1	0	0	NA	104.2	97.8	NA	3.22	1.12	NA	1.753	0.875	NA
93093	2	45	3	4	1	1	155.324	107.6	44.6	127.7	0.814732	80	54	131	201	2	3.6	252	7	1	NA	NA	2	1	2	2	0	840	NA	0	0	0	0	0	0	0	0	0	NA	NA	0	0	NA	1.73	9.11	NA	1.403	2.4	NA
112213	2	39	3	4	3	1	170.136	129.1	44.6	114.6	0.698603	144	48	94	171	2.2	6.2	284	6.9	1	NA	NA	2	1	4	2	0	240	NA	2	2	3	3	3	3	3	2	1	2	NA	0	0	NA	4.02	4.65	NA	1.432	1.15	NA
120723	2	38	3	4	1	2	158.504	111.8	44.5	128	0.809623	173	36	111	182	2.1	2.5	245	6.6	1	NA	NA	2	1	1	2	0	720	NA	0	0	1	1	1	0	0	0	0	0	NA	0	0	NA	1.5	3.48	NA	0.678	0.737	NA
121814	2	41	3	4	3	1	166.322	123.1	44.5	123.5	0.762581	NA	46	NA	151	4	7.4	248	7	1	NA	NA	2	1	1	2	0	360	NA	0	0	0	0	1	1	0	0	0	0	NA	0	0	NA	2.37	2.64	NA	0.369	0.502	NA
124408	2	42	4	4	3	1	163.529	119	44.5	120.8	0.752252	NA	NA	NA	NA	NA	NA	NA	NA	1	NA	NA	2	1	4	2	0	240	NA	0	0	0	1	0	0	0	0	0	0	NA	0	0	NA	1.39	3.06	NA	1.097	1.856	NA
77584	2	35	4	3	3	1	161.914	116.4	44.4	130	0.81479	58	40	123	175	1.9	4.2	304	6.9	1	NA	NA	2	1	3	2	0	360	NA	2	0	0	2	0	0	2	0	0	0	NA	0	0	NA	7.52	1.99	NA	1.101	2.262	NA
117953	2	41	3	4	1	1	155.094	106.8	44.4	122.2	0.782562	75	66	125	206	2.8	4.8	346	7	1	NA	NA	2	1	1	2	0	120	NA	0	0	0	2	1	0	0	0	0	0	NA	0	0	NA	5.6	6.31	NA	2.396	1.541	NA
121293	2	25	3	4	1	1	166.967	123.5	44.3	139	0.859204	94	69	85	173	1.9	5	276	7.7	0	NA	NA	2	1	4	2	0	480	NA	1	1	1	1	0	1	0	0	0	0	NA	0	0	NA	7.86	2.93	NA	3.552	1.223	NA
91922	2	39	4	4	1	1	170.181	128.3	44.3	135.4	0.829011	NA	43	NA	236	2.5	4.7	393	7.3	1	NA	NA	2	1	2	2	0	480	NA	0	0	0	1	0	0	0	0	0	0	NA	0	0	NA	2.81	3	NA	1.455	1.72	NA
88674	2	27	4	2	1	1	162.861	117.5	44.3	130.3	0.815518	NA	56	NA	214	2.1	5.8	233	6.8	1	NA	NA	2	1	3	2	1	180	NA	0	0	3	0	0	0	0	0	0	0	NA	56.2	14.4	NA	0.96	0.46	NA	1.017	0.236	NA
114520	2	43	4	3	1	1	164.516	119.9	44.3	130.2	0.810783	62	47	134	193	2	6	374	6.8	0	NA	NA	2	1	4	2	0	180	NA	0	0	0	0	0	0	0	0	0	NA	NA	0	0	NA	3.23	0.52	NA	1.911	0.803	NA
117571	2	41	4	4	2	1	167.911	124.9	44.3	119.7	0.737823	NA	79	NA	145	1.6	2.2	361	6.8	1	NA	NA	2	1	3	2	0	120	NA	0	0	0	2	0	0	0	0	0	0	NA	22.3	43.3	NA	0.67	1.81	NA	1.534	1.803	NA
84734	2	36	3	3	1	1	167.629	124.2	44.2	135.8	0.839029	NA	26	NA	145	3.3	8.5	396	6.9	1	NA	NA	2	1	4	2	0	780	NA	1	1	2	2	2	1	1	0	0	1	NA	119	0	NA	3	2.96	NA	2.143	1.06	NA
74997	2	43	3	3	1	1	174.052	133.9	44.2	134	0.812488	NA	52	NA	218	2.3	2.8	199	6.8	1	NA	NA	2	1	18	2	1	480	NA	2	1	2	3	2	1	1	0	0	2	NA	0	0	NA	1.69	3.54	NA	0.394	1.33	NA
111590	2	40	3	4	1	1	169.04	126.3	44.2	131.3	0.807832	NA	59	NA	188	2.9	7.5	270	7	1	NA	NA	2	1	3	2	0	180	NA	0	0	1	1	0	1	1	0	0	1	NA	0	0	NA	1.76	4.92	NA	0.92	0.468	NA
123475	2	26	4	4	3	1	171.696	130.3	44.2	123.3	0.752722	58	33	62	107	2.2	2.3	412	6.9	1	NA	NA	2	1	1	2	0	60	NA	0	1	0	0	1	0	0	0	0	0	NA	0	0	NA	2.28	4.8	NA	0.648	1.556	NA
123847	2	29	4	4	1	1	165.661	121.3	44.2	118.8	0.738344	156	31	63	125	2.7	5.4	313	7.2	1	NA	NA	2	1	11	2	1	480	NA	0	1	0	2	2	0	0	0	0	0	NA	0	0	NA	8.25	1.19	NA	1.255	1.241	NA
79757	2	40	1	5	1	2	154.055	104.9	44.2	114.5	0.737937	115	51	140	214	2	5.8	260	6.1	1	NA	NA	2	1	3	2	1	480	NA	0	0	1	1	1	0	0	0	0	0	NA	0	0	NA	2.39	8.4	NA	1.231	8.025	NA
118024	2	35	4	5	1	1	175.546	135.9	44.1	137	0.828386	NA	NA	NA	NA	NA	NA	NA	NA	1	NA	NA	2	1	4	2	1	300	NA	0	0	1	1	0	0	0	0	0	0	NA	NA	NA	NA	NA	NA	NA	NA	NA	NA
93185	2	44	4	4	1	1	160.144	113.1	44.1	129.1	0.817293	NA	46	NA	183	1.8	3.3	318	7.5	0	NA	NA	2	1	3	1	0	240	NA	0	0	1	2	3	0	0	0	0	0	NA	0	0	NA	2.26	2.08	NA	0.623	1.976	NA
114691	2	34	4	4	1	3	165.78	121.2	44.1	129.6	0.806393	NA	77	NA	213	2	3.4	155	6.4	1	NA	NA	2	1	4	2	0	300	NA	0	1	1	1	0	1	0	0	0	0	NA	0	0	NA	5.69	3.11	NA	2.936	1.917	NA
90307	2	42	4	4	1	2	157.032	108.5	44	137.7	0.881667	NA	38	NA	151	3.5	7.2	186	7.2	0	NA	NA	3	1	4	2	0	420	NA	0	0	1	1	0	0	0	0	0	0	NA	0	NA	NA	4.27	NA	NA	1.158	NA	NA
88531	2	40	4	3	1	1	165.831	121	44	129.5	0.806866	NA	58	NA	148	1.7	5.2	390	7.5	0	NA	NA	2	1	3	2	0	180	NA	0	0	0	0	0	0	0	0	0	NA	NA	0	0	NA	1.96	1.88	NA	2.928	0.654	NA
81681	2	42	1	3	1	1	162.019	115.5	44	124	0.781635	NA	40	NA	153	2.5	7.7	339	6.8	1	NA	NA	1	1	2	2	0	600	NA	1	2	1	1	0	1	1	1	0	1	NA	0	0	NA	6.72	1.27	NA	2.346	2.368	NA
110529	2	43	4	4	2	1	167.06	122.8	44	125.5	0.779062	NA	NA	NA	NA	2.2	4.8	223	NA	1	NA	NA	2	1	6	2	0	360	NA	0	0	2	0	0	0	0	0	0	0	NA	0	0	NA	1.97	2.22	NA	0.915	1.473	NA
91091	2	22	4	4	1	1	154.552	105.1	44	119.7	0.772541	NA	63	NA	152	1.6	6.2	328	7.2	1	NA	NA	2	1	3	2	0	480	NA	0	1	1	1	1	0	0	0	0	0	NA	0	0	NA	4.24	2.48	NA	1.373	1.721	NA
114993	2	36	3	4	1	1	168.269	124.3	43.9	136	0.842483	55	41	78	130	1.9	2.4	246	6.4	0	NA	NA	2	1	5	2	1	300	NA	0	0	0	1	0	0	0	0	0	0	NA	0	0	NA	3.19	1.84	NA	1.403	0.443	NA
121841	2	30	3	4	1	1	155.169	105.7	43.9	127.3	0.821201	NA	48	NA	160	3.2	4.2	240	7.3	0	NA	NA	2	1	3	2	0	300	NA	0	0	0	0	0	0	0	0	0	NA	NA	0	0	NA	3.07	2.03	NA	1.079	0.883	NA
89833	2	36	4	4	1	1	163.229	116.7	43.8	127.2	0.801257	NA	50	NA	159	2.4	3.7	227	7.2	1	NA	NA	2	1	7	2	0	240	NA	0	1	3	3	0	1	0	0	0	1	NA	0	0	NA	3.12	1.9	NA	1.342	1.303	NA
117178	2	25	1	4	1	1	163.626	117	43.7	130.5	0.8223	89	49	72	139	4	7	311	7.8	1	NA	NA	2	1	2	1	0	120	NA	0	1	0	0	1	1	0	0	1	1	NA	0	0	NA	3.88	0.58	NA	1.344	1.528	NA
113951	2	36	4	5	3	1	159.16	110.7	43.7	112.7	0.720034	50	55	121	186	1.8	2.2	193	7	1	NA	NA	2	1	2	2	0	480	NA	0	0	0	0	0	0	0	0	0	NA	NA	0	0	NA	3.58	1.92	NA	1.823	1.034	NA
87636	2	42	4	4	1	1	168.314	123.8	43.7	110.1	0.684027	NA	61	NA	164	2.4	2.9	294	8.2	3	NA	NA	2	1	4	2	0	120	NA	0	0	1	3	2	0	0	0	0	0	NA	0	0	NA	1.9	2.08	NA	0.715	0.867	NA
114785	2	28	3	4	3	1	163.323	116.3	43.6	121.2	0.765576	NA	63	NA	159	3.3	5.9	323	7.4	1	NA	NA	2	1	2	2	0	360	NA	0	0	0	0	0	0	0	0	0	NA	NA	NA	NA	NA	NA	NA	NA	NA	NA	NA
111766	2	33	4	5	1	2	163.463	116.5	43.6	117.4	0.741254	NA	55	NA	201	1.8	3.1	250	7.6	1	NA	NA	2	1	2	2	0	240	NA	0	0	1	0	0	0	0	0	0	0	NA	0	0	NA	5.22	16.84	NA	5.146	7.533	NA
109568	2	32	4	4	1	1	161.131	113.2	43.6	116	0.737695	99	51	94	165	2.2	2.7	279	7.4	1	NA	NA	2	1	6	2	0	480	NA	0	0	0	0	0	0	0	0	0	NA	NA	0	0	NA	1.54	6.33	NA	1.77	2.196	NA
87163	2	44	3	5	1	1	166.713	120.9	43.5	134.2	0.840315	123	54	166	245	1.9	5.3	236	6.8	1	NA	NA	2	1	4	2	0	600	NA	0	0	0	1	1	0	0	0	0	0	NA	0	0	NA	2.25	0.41	NA	0.88	1.073	NA
85515	2	21	4	4	3	1	167.949	122.7	43.5	133.2	0.830977	45	56	140	205	1.9	2.6	303	7.3	1	NA	NA	2	1	2	2	0	120	NA	0	0	0	0	0	0	1	0	0	0	NA	0	0	NA	1.13	1.29	NA	0.993	0.417	NA
114095	2	42	1	3	1	1	164.841	118.2	43.5	127.2	0.800993	NA	35	NA	214	3.7	6.8	451	7.1	0	NA	NA	2	1	3	2	0	120	NA	0	0	0	1	1	0	0	0	0	0	NA	0	0	NA	7.89	4.76	NA	2.998	2.479	NA
78145	2	44	4	4	3	1	177.337	136.8	43.5	126.6	0.768614	46	67	83	159	2	2.4	218	7	1	NA	NA	1	1	4	2	0	600	NA	0	0	1	0	0	0	0	0	0	0	NA	0	0	NA	5.24	16.54	NA	3.756	3.335	NA
123766	2	35	4	4	3	1	156.503	106.3	43.4	124.7	0.807134	NA	28	NA	158	3.5	5.2	216	6.7	1	NA	NA	2	1	8	2	0	480	NA	0	0	0	1	0	0	0	0	0	0	NA	0	0	NA	3.34	1.25	NA	1.134	0.644	NA
115675	2	23	3	3	1	1	158.332	108.8	43.4	121.7	0.783152	NA	58	NA	190	2.4	5.1	400	7.2	1	NA	NA	2	1	2	2	0	240	NA	0	0	0	3	1	0	3	0	0	2	NA	0	0	NA	2.41	3.98	NA	0.658	2.218	NA
92124	2	42	4	4	1	1	158.623	109.2	43.4	121.2	0.779219	127	50	109	184	1.5	2.2	178	7.6	3	NA	NA	3	1	6	2	0	420	NA	2	3	1	1	1	0	0	0	0	0	NA	0	0	NA	14.06	5.35	NA	4.399	1.486	NA
116264	2	39	3	5	3	2	159.348	110.2	43.4	119	0.763333	159	60	108	200	2.5	4.8	363	6.9	1	NA	NA	2	1	1	2	0	660	NA	0	0	1	1	0	0	0	0	0	0	NA	0	0	NA	5.12	1.73	NA	2.584	1.312	NA
113055	2	27	1	3	1	1	158.768	109.4	43.4	113.2	0.727453	NA	40	NA	162	3.4	5.6	360	7.5	1	NA	NA	2	1	3	2	0	360	NA	0	0	0	0	0	0	0	0	0	NA	NA	14	0	NA	6.98	3.86	NA	1.42	1.779	NA
88748	2	38	4	4	3	1	160.686	111.8	43.3	137.7	0.880955	NA	34	NA	152	2.1	3.2	225	6.8	1	NA	NA	2	1	3	2	0	900	NA	0	0	1	0	0	0	0	0	0	0	NA	0	NA	NA	0.1	NA	NA	1.269	NA	NA
88182	2	38	5	4	3	1	165.779	119	43.3	138.2	0.870465	NA	42	NA	274	3.2	4.1	297	7.8	1	NA	NA	2	1	2	3	0	120	NA	1	1	1	2	0	1	0	0	0	1	NA	18.7	18.7	NA	2.11	5.21	NA	1.413	2.454	NA
93392	2	26	3	4	1	1	171.126	126.8	43.3	139.5	0.864817	NA	81	NA	203	2.9	15.5	347	7.2	1	NA	NA	2	1	3	1	0	180	NA	0	0	1	1	0	0	0	0	0	0	NA	0	0	NA	14.08	2.31	NA	6.238	1.318	NA
88529	2	35	2	3	1	1	162.827	114.8	43.3	135.4	0.860524	59	77	135	224	1.9	3.7	378	7.3	1	NA	NA	2	1	4	2	0	660	NA	1	1	2	3	1	0	3	1	0	0	NA	0	NA	NA	2.83	NA	NA	0.805	NA	NA
112377	2	44	4	5	2	1	161.831	113.4	43.3	122.3	0.779656	NA	77	NA	199	2.7	2.1	258	6.7	0	NA	NA	2	1	6	2	0	480	NA	0	0	0	0	0	0	0	0	0	NA	NA	0	0	NA	4.42	1.65	NA	3.4	2.209	NA
84765	2	44	2	2	1	1	154.382	103.2	43.3	113.8	0.742767	NA	40	NA	263	2.6	5	250	8	1	NA	NA	1	1	5	2	0	480	NA	0	0	0	1	3	1	0	1	0	0	NA	159.7	0	NA	1.18	4.4	NA	1.25	1.735	NA
110511	2	23	4	4	1	1	153.482	102	43.3	112.2	0.734468	NA	33	NA	157	2.6	3.9	418	6.9	1	NA	NA	1	1	2	2	1	720	NA	0	0	3	3	0	0	0	0	0	1	NA	0	0	NA	2.14	8.26	NA	1.001	3.485	NA
79685	2	41	4	4	1	1	168.611	123.1	43.3	112.6	0.703241	86	45	96	158	2.4	4.5	203	7.1	1	NA	NA	2	1	4	2	0	480	NA	0	0	0	0	0	0	0	0	0	NA	NA	0	NA	NA	1.11	NA	NA	0.208	NA	NA
82724	2	28	1	4	3	1	166.249	119.4	43.2	138.7	0.873723	191	39	101	178	2.2	5.6	332	6.6	1	NA	NA	2	1	2	2	0	300	NA	0	0	0	0	0	0	0	0	0	NA	NA	0	0	NA	1.93	4.52	NA	0.606	1.34	NA
80975	2	26	4	3	1	1	166.944	120.4	43.2	126.3	0.793954	64	44	83	140	1.6	3.6	253	6.8	1	NA	NA	2	1	3	2	1	180	NA	2	0	0	1	1	0	1	1	0	0	NA	0	0	NA	0.67	9.26	NA	0.416	3.552	NA
118738	2	42	1	1	2	1	155.382	104.3	43.2	115.9	0.755198	102	54	137	211	1	4.1	329	6.9	3	NA	NA	2	1	6	2	1	120	NA	0	2	0	1	0	0	0	0	0	0	NA	0	0	NA	0.88	0.79	NA	0.516	1.293	NA
118586	2	37	1	2	1	1	150.385	97.7	43.2	112.8	0.747109	51	50	119	179	2	3.6	234	6.2	0	NA	NA	2	1	3	2	0	60	NA	0	0	0	1	0	0	0	0	0	0	NA	0	0	NA	1.09	2.12	NA	0.982	1.151	NA
75047	2	38	3	4	3	1	158.151	107.8	43.1	134	0.866798	NA	48	NA	245	2.4	4.2	230	7	0	NA	NA	2	1	7	2	0	600	NA	1	0	3	1	0	0	0	0	0	1	NA	NA	NA	NA	NA	NA	NA	NA	NA	NA
82838	2	26	4	4	3	1	167.969	121.6	43.1	134.6	0.84485	NA	42	NA	210	2.2	2.6	323	7.3	0	NA	NA	2	1	3	1	0	480	NA	0	0	1	1	0	0	0	1	0	0	NA	0	NA	NA	21.23	NA	NA	3	NA	NA
76181	2	45	4	3	3	1	163.772	115.6	43.1	127.2	0.808566	NA	26	NA	168	3.4	4.3	258	7.8	1	NA	NA	2	1	5	2	0	60	NA	0	0	0	0	0	0	0	0	0	NA	NA	0	0	NA	2.6	0.16	NA	1.691	0.143	NA
78161	2	34	2	3	2	1	157.93	107.5	43.1	120.6	0.780662	NA	41	NA	256	3.1	8.3	325	7.4	1	NA	NA	1	1	1	1	0	480	NA	0	1	0	0	0	0	0	0	0	0	NA	0	NA	NA	3.26	NA	NA	1.102	NA	NA
84927	2	43	3	5	1	1	174.476	130.9	43	135.6	0.836398	101	40	85	145	2.2	5.9	315	7.2	1	NA	NA	2	1	2	2	1	720	NA	0	0	0	1	2	0	0	0	0	0	NA	0	0	NA	2.27	4.51	NA	1.676	1.881	NA
90020	2	33	2	4	3	1	173.272	129.1	43	133.7	0.827538	NA	51	NA	194	3.2	13.2	286	7.1	1	NA	NA	2	1	4	1	0	360	NA	0	0	0	2	3	0	0	0	0	0	NA	0	0	NA	13.42	5.84	NA	2.528	1.812	NA
109628	2	39	2	2	2	1	162.036	112.9	43	122.4	0.783423	NA	57	NA	274	2.9	4.9	481	7.1	0	NA	NA	2	1	4	2	0	120	NA	0	0	1	3	0	1	0	0	0	0	NA	0	NA	NA	2.21	NA	NA	1.612	NA	NA
115028	2	38	1	5	1	1	160.74	111.1	43	120.6	0.775009	NA	39	NA	172	3	4.7	350	6.9	1	NA	NA	2	1	3	2	0	720	NA	0	0	0	0	0	0	0	0	0	NA	NA	0	0	NA	4.9	2.17	NA	1.995	1.597	NA
88992	2	27	3	5	1	1	167.263	120.3	43	111.9	0.704939	NA	44	NA	163	2.3	5.3	206	7.2	1	NA	NA	2	1	1	2	0	300	NA	0	0	1	1	0	0	0	0	0	0	NA	42.1	0	NA	4.46	3.02	NA	1.387	1.233	NA
88205	2	23	1	3	3	1	176.604	133.8	42.9	138.3	0.849215	NA	57	NA	146	2.3	7.8	310	6.8	1	NA	NA	2	1	1	2	1	300	NA	3	3	3	3	3	3	0	0	1	0	NA	28.1	11.7	NA	1.93	4.48	NA	1.195	0.875	NA
113915	2	36	4	2	2	1	169.739	123.6	42.9	127.1	0.796068	103	41	120	182	2.8	4.3	287	7.2	1	NA	NA	2	1	6	2	0	180	NA	0	0	0	0	0	0	0	0	0	NA	NA	0	0	NA	1.56	1.22	NA	0.504	1.057	NA
110381	2	40	5	3	3	1	168.001	120.8	42.8	133.4	0.841145	86	53	106	176	3.8	8.2	300	7.3	1	NA	NA	2	1	4	2	0	240	NA	1	0	2	2	1	1	2	2	0	1	NA	0	0	NA	4.1	2.41	NA	1.011	0.489	NA
116724	2	43	1	4	1	1	159.071	108.3	42.8	114.5	0.741959	NA	51	NA	188	2.4	5.8	499	6.9	1	NA	NA	1	1	2	2	1	480	NA	1	3	3	3	3	3	3	1	1	1	NA	0	0	NA	2.81	1.78	NA	1.363	0.691	NA
121810	2	31	3	5	1	1	175.622	131.7	42.7	142.5	0.880184	NA	56	NA	196	2.2	11.9	305	6.2	1	NA	NA	2	1	1	1	0	480	NA	0	0	0	3	0	0	0	0	0	1	NA	0	0	NA	9.64	3.83	NA	3.857	2.164	NA
88786	2	43	4	3	1	1	175.222	131.1	42.7	139.5	0.862638	NA	31	NA	139	2.8	3.7	269	6.4	1	NA	NA	2	1	1	1	1	240	NA	0	0	0	1	1	0	0	0	0	0	NA	0	0	NA	2.86	4.06	NA	0.372	2.111	NA
120000	2	29	5	3	1	1	156.663	104.8	42.7	128.5	0.840365	130	47	114	187	3.6	8.6	459	7.5	1	NA	NA	1	1	1	2	0	120	NA	0	0	1	1	0	0	0	0	0	0	NA	0	0	NA	2.11	1.56	NA	1.072	0.668	NA
115269	2	36	4	4	1	1	172.188	126.6	42.7	129.3	0.806576	NA	50	NA	205	2.5	2.7	211	7.5	1	NA	NA	2	1	6	2	0	360	NA	2	0	1	3	3	0	1	0	0	0	NA	11.9	0	NA	8.99	1.83	NA	2.272	2.876	NA
92922	2	30	4	2	3	1	163.658	114.1	42.6	134.1	0.859383	NA	35	NA	137	NA	NA	NA	7.2	1	NA	NA	2	1	7	2	0	360	NA	2	3	0	2	3	3	3	0	3	2	NA	61.6	0	NA	17.85	0.34	NA	3.412	0.472	NA
88504	2	22	3	2	3	1	156.622	104.5	42.6	122	0.799208	67	37	138	188	2	6	214	7.3	1	NA	NA	2	1	2	2	0	300	NA	3	3	1	2	1	3	2	1	1	1	NA	0	0	NA	1.68	6.31	NA	0.659	4.445	NA
111110	2	45	3	4	1	1	189.266	152.6	42.6	133.7	0.79675	NA	52	NA	193	2.3	3.5	143	7.3	1	NA	NA	2	1	2	2	0	420	NA	0	0	0	0	0	0	0	0	0	NA	NA	0	0	NA	3.72	2.67	NA	1.283	0.52	NA
80656	2	33	2	1	1	1	154.053	101.1	42.6	118.5	0.782726	NA	29	NA	188	2.8	4.3	248	7.1	3	NA	NA	2	1	3	2	0	120	NA	0	1	1	2	1	1	0	0	0	0	NA	0	0	NA	5.21	1.72	NA	2.412	0.831	NA
118977	2	45	2	4	2	1	169.437	122.3	42.6	123.4	0.777209	NA	NA	NA	NA	2.4	4	273	NA	1	NA	NA	2	1	11	2	1	180	NA	0	0	2	1	1	0	0	0	0	0	NA	0	0	NA	10.36	2.29	NA	2.38	0.791	NA
112972	2	26	4	3	3	3	162.073	111.9	42.6	117.2	0.754744	81	49	75	140	2.4	1.7	225	7.1	1	NA	NA	2	1	5	2	0	120	NA	3	3	2	3	2	3	0	0	0	3	NA	53.9	0	NA	1.05	3.21	NA	0.646	1.223	NA
86510	2	36	2	4	1	1	172.797	126.9	42.5	132.6	0.828291	99	67	100	187	1.9	4.3	222	6.8	1	NA	NA	2	1	4	2	1	240	NA	1	0	1	1	1	0	0	0	0	0	NA	0	0	NA	0.53	8.59	NA	0.998	1.24	NA
124274	2	36	4	4	3	3	162.191	111.8	42.5	124.4	0.802074	83	48	72	137	1.7	5	315	6	0	NA	NA	1	1	5	1	0	240	NA	0	0	3	1	1	0	0	0	0	0	NA	0	0	NA	1.94	0.85	NA	2.181	0.724	NA
77779	2	36	4	5	1	1	176.502	132.4	42.5	125.7	0.776905	NA	41	NA	160	2.5	7.6	358	7.9	0	NA	NA	2	1	3	2	1	360	NA	0	0	0	1	1	0	2	0	0	1	NA	0	0	NA	8.26	2.68	NA	1.382	1.918	NA
78548	2	36	4	5	1	3	161.026	110.2	42.5	115.9	0.749968	87	52	28	97	2.4	7.9	292	6.6	1	NA	NA	2	1	2	2	0	660	NA	0	0	0	0	0	0	0	0	0	NA	NA	0	0	NA	10.69	4.52	NA	2.575	1.193	NA
90074	2	42	4	4	1	3	159.926	108.7	42.5	114.8	0.7454	NA	60	NA	188	1.4	3.3	258	7.3	1	NA	NA	2	1	3	2	0	300	NA	3	2	3	3	0	0	0	0	0	0	NA	0	0	NA	2.35	1.87	NA	1.658	0.906	NA
88334	2	39	4	4	1	1	166.257	117.2	42.4	135.1	0.861697	206	33	150	224	1.8	4.9	568	8	1	NA	NA	1	1	5	1	0	480	NA	0	0	0	0	1	0	0	0	0	0	NA	37	0	NA	1.56	10.67	NA	1.011	1.157	NA
76793	2	45	1	4	1	1	162.164	111.5	42.4	130.2	0.840859	NA	32	NA	212	2	5.3	354	7.1	1	NA	NA	1	1	6	1	0	360	NA	0	0	0	0	0	0	0	0	0	NA	NA	0	0	NA	2.02	1.37	NA	0.761	0.817	NA
115064	2	45	5	4	3	1	171.563	124.8	42.4	132.8	0.833826	94	51	144	214	2.1	3.9	188	7	1	NA	NA	2	1	3	2	0	10	NA	0	0	3	1	3	0	0	1	0	0	NA	0	13.4	NA	0.85	0.63	NA	1.451	1.029	NA
116241	2	28	3	2	1	1	153.42	99.8	42.4	125.5	0.833282	110	38	119	179	2.3	5.9	298	6.4	1	NA	NA	2	1	3	2	0	300	NA	0	0	0	1	0	0	0	0	0	0	NA	0	0	NA	0.91	1.28	NA	0.178	0.266	NA
116148	2	40	1	3	1	1	161.289	110.3	42.4	118.5	0.767371	NA	66	NA	215	2.5	3.4	279	6.5	1	NA	NA	2	1	5	1	1	240	NA	0	0	0	0	0	0	0	0	0	NA	NA	51	0	NA	3.49	13.32	NA	1.315	3.396	NA
80387	2	42	4	5	3	1	159.746	108.2	42.4	117.5	0.764561	48	83	51	144	1.4	4.4	481	7.7	1	NA	NA	3	1	4	2	0	420	NA	0	2	3	1	1	1	2	0	0	1	NA	0	0	NA	2.94	5.3	NA	1.422	1.738	NA
86087	2	31	1	4	1	1	154.034	100.6	42.4	114.4	0.758067	NA	94	NA	197	2.9	3	293	7.2	1	NA	NA	1	1	5	1	0	240	NA	0	0	1	1	1	0	1	0	0	0	NA	0	NA	NA	3.76	NA	NA	1.442	NA	NA
124051	2	23	3	5	1	1	166.612	117.7	42.4	118.3	0.75374	54	55	96	162	1.9	5.7	322	7.3	1	NA	NA	2	1	1	2	1	60	NA	0	0	1	1	2	0	0	0	0	1	NA	NA	NA	NA	NA	NA	NA	NA	NA	NA
89106	2	44	4	5	1	1	164.833	115.2	42.4	117.1	0.75011	NA	52	NA	165	3	4.5	330	8	1	NA	NA	2	1	4	2	0	360	NA	0	0	0	1	0	0	0	0	0	0	NA	54.1	0	NA	0.64	1.29	NA	1.241	1.322	NA
112146	2	31	4	4	3	1	169.828	122	42.3	123.5	0.780612	131	53	128	207	3.9	8.2	302	7.3	1	NA	NA	2	1	4	2	0	240	NA	0	0	0	1	0	0	0	1	0	0	NA	0	0	NA	3.64	2.62	NA	1.05	0.742	NA
115979	2	24	2	4	2	3	157.477	104.9	42.3	115.8	0.760104	NA	35	NA	196	3.6	6.8	281	7.3	1	NA	NA	2	1	1	2	0	300	NA	2	3	1	1	2	3	3	3	9	1	NA	14	0	NA	1.4	0	NA	0.356	0.283	NA
82946	2	45	3	4	1	1	162.356	111.5	42.3	108.1	0.69882	NA	43	NA	188	2.7	8.1	286	7.5	0	NA	NA	2	1	3	2	1	300	NA	0	0	0	0	1	0	0	0	0	0	NA	0	0	NA	2.2	6.12	NA	1.673	0.893	NA
88497	2	42	3	4	3	1	151.431	97	42.3	101.7	0.680748	NA	45	NA	198	2.2	4.9	214	7.3	1	NA	NA	2	1	3	2	0	720	NA	0	0	0	1	0	0	0	0	0	0	NA	0	NA	NA	10.33	NA	NA	3.341	NA	NA
76482	2	42	4	4	3	1	164.792	114.6	42.2	133.2	0.856041	NA	60	NA	234	2	2.5	294	6.9	1	NA	NA	2	1	2	2	1	480	NA	1	0	0	0	1	0	1	0	0	0	NA	0	0	NA	3.7	2.46	NA	0.935	2.045	NA
85822	2	43	3	4	2	1	166.864	117.5	42.2	131.5	0.839852	NA	53	NA	226	2.9	5.9	387	7.4	1	NA	NA	3	1	2	2	0	720	NA	1	2	3	2	0	2	0	0	0	0	NA	0	0	NA	4.28	0.83	NA	1.096	0.94	NA
112608	2	44	4	5	1	1	164.432	114.1	42.2	130.3	0.838319	56	36	104	151	2.2	3.5	325	6.4	1	NA	NA	2	1	3	2	0	360	NA	3	2	1	2	0	1	1	0	0	1	NA	NA	NA	NA	NA	NA	NA	NA	NA	NA
120018	2	30	4	4	3	3	164.72	114.5	42.2	130.2	0.836943	39	67	60	135	2.3	2.1	384	7	0	NA	NA	2	1	3	2	0	360	NA	2	2	3	3	2	2	0	0	0	1	NA	0	0	NA	1.06	4.77	NA	1.688	1.596	NA
112063	2	41	4	4	1	1	158.638	106.2	42.2	120.9	0.791921	77	80	157	252	2.1	3.6	662	6.5	1	NA	NA	2	1	5	2	0	120	NA	0	0	0	0	0	0	0	0	0	NA	NA	50.5	0	NA	4.56	4.08	NA	0.886	1.319	NA
111321	2	43	1	2	1	3	159.085	106.8	42.2	118.2	0.773145	NA	100	NA	252	1.6	4.2	294	7.5	1	NA	NA	2	1	3	2	0	60	NA	0	1	0	0	0	1	0	0	0	0	NA	28.8	NA	NA	1.74	NA	NA	1.793	NA	NA
113083	2	43	1	2	1	1	151.085	96.1	42.1	129	0.867211	NA	50	NA	175	2.1	5.4	270	6.9	1	NA	NA	2	1	3	2	0	180	NA	0	0	2	2	1	0	1	0	0	1	NA	0	0	NA	5.86	5.33	NA	1.044	1.203	NA
82281	2	41	4	2	1	1	157.021	103.8	42.1	121.5	0.801203	54	65	95	171	1.3	2.8	263	6.9	1	NA	NA	2	1	1	2	1	180	NA	1	1	0	3	3	2	3	1	0	0	NA	NA	NA	NA	NA	NA	NA	NA	NA	NA
84716	2	44	3	2	1	1	161.716	110.1	42.1	120.6	0.783639	156	39	141	211	1.8	4.4	281	7.1	0	NA	NA	2	1	6	2	0	180	NA	0	2	2	2	0	0	0	0	0	0	NA	0	NA	NA	4.44	NA	NA	1.856	NA	NA
115386	2	40	5	3	1	1	163.832	113	42.1	107	0.690764	94	59	97	175	2.9	2.9	217	6.9	0	NA	NA	2	1	2	2	0	360	NA	2	0	3	3	3	3	3	0	0	2	NA	0	NA	NA	3.85	NA	NA	2.382	NA	NA
119386	2	37	4	4	3	1	154.766	100.6	42	124.6	0.828924	58	66	132	210	1.7	4.5	351	7	1	NA	NA	2	1	4	2	0	660	NA	2	0	0	0	0	0	0	0	0	0	NA	0	0	NA	1.67	1.13	NA	0.857	2.915	NA
110610	2	29	2	1	1	1	146.466	90.1	42	113.9	0.778912	118	56	113	193	2.2	4.6	288	7.2	1	NA	NA	2	1	4	2	0	60	NA	3	0	0	0	0	0	0	0	0	0	NA	0	0	NA	1.35	0.72	NA	1.443	2.379	NA
83301	2	30	3	4	1	1	157.435	104.1	42	113.5	0.748651	NA	36	NA	185	2.9	3.6	290	6.9	3	NA	NA	2	1	4	1	1	240	NA	0	1	1	1	1	0	0	0	0	1	NA	0	0	NA	2.86	1.25	NA	0.524	1.197	NA
92203	2	40	1	1	1	1	156.254	102.3	41.9	134.2	0.889941	NA	37	NA	150	4	5.6	426	7.7	3	NA	NA	2	1	6	2	0	360	NA	0	0	0	0	3	0	0	0	0	0	NA	0	0	NA	8.16	1.08	NA	3.578	0.636	NA
92573	2	42	3	2	2	1	156.559	102.7	41.9	132.3	0.876485	NA	46	NA	172	1.3	7.4	408	7.1	1	NA	NA	1	1	6	1	0	120	NA	2	2	2	3	3	3	3	3	0	2	NA	0	0	NA	9.32	4.85	NA	3.125	4.041	NA
117676	2	45	3	3	3	1	159.204	106.2	41.9	115.3	0.757488	362	42	58	172	1.9	5.4	276	6.6	1	NA	NA	2	1	2	2	0	840	NA	3	1	2	3	3	0	1	2	0	0	NA	0	0	NA	1.03	1.92	NA	1.227	1.974	NA
81962	2	38	3	4	1	1	175.6	129.2	41.9	117	0.731893	133	52	104	183	2.5	5.8	340	7.2	3	NA	NA	1	1	4	2	0	240	NA	0	0	0	1	0	0	0	0	0	0	NA	0	0	NA	4.53	5.42	NA	1.726	2.205	NA
109865	2	33	4	2	3	1	163.909	112.3	41.8	126	0.817119	118	47	186	257	2.7	3.4	288	7.8	1	NA	NA	2	1	7	2	0	10	NA	3	1	2	1	1	0	3	0	0	1	NA	0	0	NA	7.32	3.1	NA	1.47	1.084	NA
90470	2	44	1	3	1	1	147.386	90.8	41.8	113.6	0.776903	NA	45	NA	240	2.9	5.5	383	6.7	3	NA	NA	2	1	5	2	0	180	NA	0	0	0	1	1	0	0	0	0	0	NA	0	0	NA	5.97	6.17	NA	2.912	2.489	NA
88589	2	37	4	4	1	1	162.416	110	41.7	130.6	0.852194	NA	44	NA	141	2.5	4.3	351	7.5	1	NA	NA	1	1	4	2	0	900	NA	0	0	1	1	1	0	0	0	0	0	NA	0	0	NA	7.98	3.32	NA	3.202	1.49	NA
120519	2	32	4	4	3	1	161.156	108.3	41.7	128.8	0.843727	100	61	87	168	2.5	2.1	319	7.6	1	NA	NA	1	1	1	2	1	180	NA	0	1	3	2	0	0	0	0	0	0	NA	0	0	NA	3.6	4.98	NA	2.097	1.948	NA
114677	2	41	4	5	3	2	177.175	130.9	41.7	135	0.843417	NA	51	NA	255	3.4	4.2	583	7.7	3	NA	NA	1	1	4	1	1	600	NA	1	1	1	1	1	0	1	0	0	0	NA	0	0	NA	1.84	1.73	NA	0.516	0.747	NA
93325	2	28	3	4	1	1	165.197	113.8	41.7	123.6	0.799698	71	58	91	163	1.8	3.5	395	7	1	NA	NA	2	1	3	2	0	360	NA	0	0	2	3	0	0	0	0	0	0	NA	0	NA	NA	2.89	NA	NA	0.647	NA	NA
92307	2	35	3	4	1	1	169.92	120.4	41.7	106.2	0.677503	39	58	81	147	1.9	7.4	339	7.8	1	NA	NA	2	1	3	2	0	240	NA	0	0	1	2	0	0	0	0	0	0	NA	0	8	NA	3.54	10.66	NA	0.912	3.535	NA
116892	2	37	3	2	1	1	173.898	125.8	41.6	134.5	0.849532	81	62	92	170	3.3	5.3	339	6.4	1	NA	NA	2	1	4	1	1	60	NA	1	0	1	3	0	1	1	0	0	0	NA	0	0	NA	7.33	2.64	NA	1.484	0.738	NA
76347	2	32	3	3	3	1	164.156	112.1	41.6	130.4	0.847723	NA	37	NA	168	1.9	8.4	310	6.9	1	NA	NA	2	1	2	1	0	300	NA	2	1	1	1	1	1	2	2	0	1	NA	0	0	NA	1.32	4.78	NA	0.783	1.59	NA
111058	2	32	1	1	1	3	152.227	96.4	41.6	121.9	0.822929	66	50	89	152	2.3	3.4	382	6.7	3	NA	NA	2	1	4	2	0	420	NA	0	0	0	0	0	0	1	0	0	0	NA	0	0	NA	5.58	6.68	NA	2.869	3.256	NA
122792	2	45	4	5	3	1	171.882	122.9	41.6	122.3	0.776991	NA	58	NA	198	1.6	3	278	7	1	NA	NA	2	1	1	2	0	960	NA	0	0	0	0	0	0	0	0	0	NA	NA	0	0	NA	5.29	3.45	NA	2.414	1.475	NA
92419	2	45	3	4	1	1	167.059	116.1	41.6	117.9	0.759772	89	45	94	157	2.9	7.2	331	7.2	1	NA	NA	2	1	1	2	0	300	NA	0	0	0	0	0	0	0	0	0	NA	NA	0	0	NA	0.98	0.87	NA	1.999	0.334	NA
116520	2	45	4	4	1	3	166.771	115.7	41.6	117.3	0.756558	NA	58	NA	215	2.6	2.1	348	8.3	1	NA	NA	1	1	1	2	0	360	NA	0	1	0	3	0	0	0	3	0	1	NA	0	0	NA	2.87	1.08	NA	0.743	1.855	NA
110645	2	43	4	4	1	1	169.549	119.3	41.5	119.2	0.763712	NA	28	NA	212	2.8	5.5	269	6.7	1	NA	NA	2	1	5	2	1	240	NA	1	1	1	1	1	0	0	0	0	0	NA	14.4	0	NA	1.61	6.91	NA	1.461	0.933	NA
79039	2	34	3	4	3	2	157.961	103.3	41.4	133.5	0.887577	NA	35	NA	195	3.6	8.3	303	6.9	1	NA	NA	1	1	1	1	0	60	NA	0	0	0	0	0	0	0	0	0	NA	NA	0	0	NA	1.08	1.23	NA	1.122	1.074	NA
80009	2	42	3	5	1	1	162.112	108.8	41.4	122	0.800668	NA	39	NA	163	1.9	4.5	215	7	1	NA	NA	3	1	4	1	0	480	NA	1	0	1	2	0	1	0	0	0	1	NA	0	0	NA	3.38	4.23	NA	2.83	1.912	NA
90125	2	39	1	5	1	1	162.855	109.8	41.4	117.6	0.770028	NA	45	NA	201	2	6.7	245	6.8	1	NA	NA	2	1	6	2	0	300	NA	1	0	0	2	3	0	0	0	0	0	NA	22.4	0	NA	3.15	4.69	NA	1.629	1.715	NA
113965	2	39	4	5	1	1	165.284	113.1	41.4	112.8	0.733151	NA	84	NA	189	3	2.6	256	6.8	3	NA	NA	2	1	1	2	1	240	NA	0	0	0	0	0	0	0	0	0	NA	NA	0	0	NA	3.01	6.26	NA	1.558	2.076	NA
92812	2	37	1	4	1	1	158.534	103.8	41.3	123.9	0.823587	59	42	85	139	1.6	4.9	294	7	3	NA	NA	1	1	5	1	1	120	NA	1	0	1	1	0	0	0	0	0	0	NA	0	0	NA	8.77	1.85	NA	2.54	1.427	NA
85019	2	36	4	2	3	1	165.264	112.8	41.3	123.5	0.804039	42	49	129	186	1.4	2.5	256	8.3	3	NA	NA	2	1	11	2	0	300	NA	1	0	0	0	0	1	0	0	0	0	NA	0	0	NA	1.28	3.35	NA	0.73	0.871	NA
78275	2	24	1	3	1	1	152.937	96.6	41.3	117.2	0.793178	NA	51	NA	218	3.1	7.9	182	6.9	0	NA	NA	2	1	2	2	0	300	NA	0	3	1	1	3	1	1	1	0	1	NA	0	0	NA	0.74	1.02	NA	0.184	0.594	NA
87555	2	31	3	4	1	1	148.601	91.2	41.3	112.2	0.770339	85	47	115	179	2.1	3.7	223	7.3	1	NA	NA	2	1	5	2	0	360	NA	0	0	0	1	1	0	0	0	0	0	NA	0	19.1	NA	3.22	2.53	NA	1.426	1.041	NA
91803	2	37	3	3	1	1	167.231	115.5	41.3	118.5	0.766938	NA	53	NA	198	4.7	7.9	295	7.5	3	NA	NA	2	1	1	2	0	660	NA	2	1	0	3	3	1	0	0	0	2	NA	0	0	NA	11.19	1.17	NA	2.571	0.715	NA
121052	2	24	2	3	1	1	160.884	106.9	41.3	113.4	0.748266	NA	37	NA	149	3.6	7.9	306	7.1	1	NA	NA	2	1	1	2	1	420	NA	1	1	0	2	2	1	3	1	0	1	NA	NA	NA	NA	NA	NA	NA	NA	NA	NA
77265	2	41	4	5	1	1	161.41	107.6	41.3	109.4	0.720695	77	39	130	184	1.6	5.5	294	7.4	1	NA	NA	2	1	2	3	0	480	NA	0	0	1	1	0	0	0	0	0	0	NA	29.3	0	NA	3.6	7.95	NA	1.773	2.753	NA
78862	2	36	4	3	1	1	159.413	104.7	41.2	120.2	0.798075	NA	45	NA	194	2.4	2.7	235	6.9	0	NA	NA	2	1	6	2	1	720	NA	0	0	0	1	0	0	0	0	0	0	NA	0	0	NA	6.98	1.39	NA	1.306	0.662	NA
79147	2	38	3	4	2	1	161.155	107	41.2	115.9	0.765356	NA	49	NA	346	2.6	5.2	247	7.6	1	NA	NA	2	1	5	2	0	600	NA	1	1	1	1	0	1	0	0	0	2	NA	33.5	NA	NA	7.34	NA	NA	1.833	NA	NA
85566	2	42	3	4	1	1	161.501	107.2	41.1	116.1	0.767095	107	65	167	253	1.9	6	295	6.6	1	NA	NA	2	1	4	2	1	240	NA	0	0	0	0	0	0	0	0	0	NA	NA	14.4	0	NA	1.75	0.84	NA	0.702	0.202	NA
93661	2	27	2	4	1	1	157.573	101.8	41	127	0.85089	NA	42	NA	138	2.1	4.9	303	7.1	1	NA	NA	2	1	3	2	0	480	NA	1	1	3	1	1	0	0	0	0	1	NA	0	0	NA	0.65	2.57	NA	0.23	0.723	NA
122333	2	39	1	2	1	1	157.03	101.1	41	124.7	0.836923	NA	39	NA	141	2.7	7	291	6.5	1	NA	NA	2	1	6	1	0	240	NA	1	0	1	3	2	0	3	0	0	0	NA	NA	NA	NA	NA	NA	NA	NA	NA	NA
121088	2	31	3	4	1	1	161.623	107.1	41	121	0.800469	150	35	122	187	2.4	5.1	269	7	1	NA	NA	2	1	1	2	0	240	NA	0	1	0	2	1	0	0	0	0	1	NA	0	0	NA	0.86	8.76	NA	1.819	2.457	NA
118737	2	26	1	3	1	1	152.38	95.2	41	106.4	0.724918	NA	51	NA	150	3	2.3	260	7.5	1	NA	NA	2	1	3	2	1	180	NA	1	0	0	0	0	0	0	0	0	0	NA	0	0	NA	2.14	1.57	NA	2.595	1.325	NA
117942	2	36	1	4	1	1	155.266	98.6	40.9	119.8	0.809909	64	48	90	151	1.8	3.2	271	6.8	3	NA	NA	2	1	3	1	0	240	NA	0	0	0	0	0	0	0	0	0	NA	NA	0	0	NA	2.56	0.98	NA	2.032	1.068	NA
112251	2	27	1	2	1	1	153.524	96.4	40.9	115.2	0.783217	48	48	118	176	1.9	3.4	262	7.3	1	NA	NA	2	1	4	2	0	300	NA	0	0	0	0	0	0	0	0	0	NA	NA	0	0	NA	5.02	0.21	NA	1.339	0.241	NA
118729	2	43	1	2	1	1	156.677	100.4	40.9	111.1	0.747703	49	54	60	124	3	2.9	291	7.3	1	NA	NA	2	1	3	2	0	300	NA	3	3	3	2	3	1	1	0	0	0	NA	0	0	NA	2.66	3.62	NA	1.998	0.96	NA
112884	2	27	4	4	1	1	165.757	112.1	40.8	123	0.806112	70	50	204	268	2.4	5	342	7.1	1	NA	NA	2	1	2	2	0	240	NA	0	0	0	0	0	0	0	0	0	NA	NA	0	0	NA	2.31	4.86	NA	0.929	1.229	NA
121592	2	29	4	2	3	1	177.607	128.7	40.8	124.3	0.786988	NA	52	NA	146	1.6	2.5	134	7.2	0	NA	NA	1	1	2	1	0	240	NA	0	0	0	0	0	0	0	0	0	NA	NA	0	0	NA	2.06	1.6	NA	2.012	0.799	NA
85676	2	32	4	4	3	1	165.239	111.4	40.8	112.3	0.73714	48	45	94	149	2.4	5.8	293	7	1	NA	NA	2	1	5	2	0	180	NA	3	3	3	3	3	2	3	2	0	0	NA	23.4	0	NA	9.27	4.25	NA	1.404	1.171	NA
118196	2	27	4	5	1	1	156.556	100	40.8	107.1	0.722239	NA	NA	NA	NA	NA	NA	NA	NA	1	NA	NA	2	1	3	2	0	720	NA	0	0	1	1	2	0	0	0	0	0	NA	42.1	0	NA	2.55	6.6	NA	1.049	2.424	NA
123064	2	44	4	3	1	2	165.219	111.1	40.7	123.8	0.814006	NA	81	NA	210	1.7	3.9	345	6.8	0	NA	NA	2	1	2	2	0	360	NA	0	0	3	3	3	0	0	0	0	0	NA	0	0	NA	3.69	6.67	NA	1.023	1.457	NA
80302	2	33	4	2	3	1	158.386	102.1	40.7	117.7	0.790416	NA	55	NA	123	2	4.2	336	6.5	1	NA	NA	2	1	3	2	1	60	NA	0	0	1	1	1	0	0	0	0	0	NA	0	0	NA	5.47	1.05	NA	1.604	1.15	NA
81023	2	22	4	4	1	1	161.077	105.6	40.7	114	0.759145	NA	50	NA	152	2.4	2.4	324	6.4	0	NA	NA	2	1	1	2	0	480	NA	0	1	0	1	2	0	0	0	0	0	NA	0	0	NA	1.3	4.28	NA	0.952	3.073	NA
115354	2	34	3	5	3	1	175.6	125.5	40.7	112.4	0.716871	45	62	82	153	3	4.2	252	6	1	NA	NA	2	1	2	2	0	540	NA	2	1	2	3	1	1	0	0	0	2	NA	0	0	NA	4.18	0.37	NA	0.877	0.923	NA
117290	2	45	3	4	1	1	162.871	107.7	40.6	134	0.888857	101	44	101	165	3.7	5.7	314	6.9	1	NA	NA	2	1	3	2	0	300	NA	0	0	0	1	0	0	0	0	0	0	NA	0	0	NA	1.38	0.98	NA	1.363	0.527	NA
115958	2	38	3	2	1	1	162.038	106.6	40.6	128.6	0.855229	NA	33	NA	211	2.5	5.2	221	NA	1	NA	NA	2	1	3	2	0	240	NA	0	0	0	0	0	0	0	0	0	NA	NA	0	0	NA	6.86	4.67	NA	1.85	2.51	NA
118069	2	28	3	4	1	1	166.165	112.1	40.6	123.1	0.808421	NA	37	NA	224	3.2	3.9	271	7.4	1	NA	NA	1	1	1	2	1	180	NA	1	1	0	1	2	2	0	0	0	1	NA	0	NA	NA	3.92	NA	NA	1.456	NA	NA
111676	2	24	4	5	3	1	165.794	111.6	40.6	122.6	0.806037	NA	53	NA	157	3.4	4.6	295	7.8	1	NA	NA	2	1	2	2	0	360	NA	0	0	0	0	0	0	0	0	0	NA	NA	0	0	NA	4.13	0.44	NA	1.574	3.563	NA
110034	2	35	4	5	3	1	163.851	109	40.6	119.8	0.792284	NA	NA	NA	NA	NA	NA	NA	NA	1	NA	NA	2	1	2	2	0	240	NA	0	0	1	1	0	0	0	0	0	0	NA	0	0	NA	3.56	9.12	NA	1.513	2.824	NA
80043	2	38	3	4	3	1	153.289	95.4	40.6	108.5	0.741863	NA	53	NA	165	2.7	5.3	334	6.9	1	NA	NA	2	1	4	2	0	240	NA	0	0	1	1	0	0	0	0	0	0	NA	79	0	NA	1.64	2	NA	1.73	0.601	NA
77159	2	38	5	4	1	1	168.447	115.2	40.6	111.5	0.727265	NA	39	NA	166	2.7	4.4	357	8.2	0	NA	NA	2	1	3	2	0	240	NA	0	0	0	0	0	0	0	0	0	NA	NA	NA	NA	NA	NA	NA	NA	NA	NA	NA
110167	2	29	4	4	3	1	158.932	102.3	40.5	127.8	0.859585	NA	55	NA	168	2.3	4	183	6.5	1	NA	NA	2	1	2	2	0	600	NA	0	0	1	1	0	0	0	0	0	0	NA	0	0	NA	2.61	0.87	NA	0.844	0.867	NA
113628	2	37	3	4	3	1	155.079	97.4	40.5	125.7	0.855899	226	34	60	139	1.7	6.6	308	7.2	1	NA	NA	2	1	3	1	0	540	NA	1	0	3	3	3	0	0	0	0	0	NA	59.5	0	NA	6.39	6.62	NA	5.881	2.334	NA
115800	2	45	3	4	1	2	167.406	113.5	40.5	129.8	0.850654	57	50	146	207	2.6	5	322	7	0	NA	NA	2	1	4	2	1	360	NA	0	0	1	1	0	0	0	0	0	0	NA	0	0	NA	4.99	2.98	NA	1.441	1.524	NA
83144	2	34	3	2	1	1	159.32	102.8	40.5	121.5	0.816216	116	34	146	203	1.5	3.4	267	6.8	1	NA	NA	2	1	4	2	0	240	NA	0	1	2	3	0	0	0	0	0	0	NA	0	0	NA	3.42	4.31	NA	1.493	1.098	NA
76140	2	27	3	2	1	1	160.862	104.8	40.5	112	0.748781	NA	37	NA	183	4.5	7.2	260	6.6	1	NA	NA	2	1	4	2	0	240	NA	1	0	0	2	0	0	1	0	0	1	NA	0	28.1	NA	9.98	5.54	NA	1.343	1.36	NA
122107	2	34	4	4	2	1	159.629	103.2	40.5	110.4	0.740928	50	50	109	169	2.9	6.6	357	7.3	1	NA	NA	2	1	2	2	0	300	NA	1	1	0	1	3	0	0	0	0	0	NA	42.1	23.4	NA	5.12	0.64	NA	1.032	1.293	NA
89476	2	44	4	4	3	1	161.78	106	40.5	106.8	0.711987	50	63	107	180	1.7	2.9	426	7.8	3	NA	NA	2	1	7	2	0	540	NA	0	0	0	0	1	0	0	0	0	0	NA	0	0	NA	1.61	2.8	NA	0.301	1.007	NA
77912	2	34	4	2	2	1	163.148	107.8	40.5	103	0.683769	NA	77	NA	186	2.6	4.2	295	7.1	1	NA	NA	2	1	6	2	0	300	NA	0	0	0	0	0	0	0	0	0	NA	NA	0	0	NA	0.39	9.88	NA	0.153	2.805	NA
112059	2	43	5	2	1	1	162.133	106.2	40.4	140.4	0.936506	90	51	119	188	1.9	5	246	7.6	3	NA	NA	2	1	4	2	1	120	NA	0	0	0	1	0	1	0	0	0	0	NA	0	NA	NA	2.29	NA	NA	1.039	NA	NA
81170	2	24	3	2	1	1	162.819	107.1	40.4	126.7	0.843342	70	49	73	136	1.7	6.4	265	6.5	1	NA	NA	2	1	2	2	1	360	NA	1	0	3	3	0	0	0	0	0	0	NA	0	0	NA	2.2	3.87	NA	1.806	2.366	NA
80653	2	35	3	5	1	1	168.937	115.3	40.4	126.7	0.82793	NA	61	NA	164	3.3	5	238	7	1	NA	NA	2	1	3	2	0	600	NA	0	0	0	0	0	0	0	0	0	NA	NA	0	0	NA	10.18	7.37	NA	3.91	3.131	NA
77581	2	31	3	4	1	1	163.804	108.4	40.4	123.3	0.818239	161	41	109	182	1.9	5.1	203	7.2	1	NA	NA	2	1	6	2	0	180	NA	0	0	3	1	0	0	0	0	0	1	NA	0	NA	NA	1.74	NA	NA	0.532	NA	NA
77960	2	37	3	4	3	1	163.804	108.4	40.4	121.4	0.80563	NA	32	NA	201	3.7	6.8	360	6.7	1	NA	NA	2	1	5	2	0	600	NA	0	0	0	0	0	0	0	0	0	NA	NA	0	11.2	NA	0.94	3.59	NA	1.837	3.191	NA
114069	2	27	4	4	3	1	163.426	107.9	40.4	120.5	0.800583	NA	24	NA	183	2.4	1.8	337	7	1	NA	NA	3	1	2	2	0	180	NA	0	0	0	0	0	0	0	0	0	NA	NA	0	71.8	NA	1.62	3.24	NA	0.766	0.669	NA
88496	2	37	3	4	1	1	164.858	109.8	40.4	118	0.780559	60	50	114	176	2.2	4.9	271	7.2	3	NA	NA	2	1	3	2	0	300	NA	0	0	1	1	0	0	0	0	0	0	NA	0	0	NA	1.86	2.5	NA	0.755	1.082	NA
76740	2	40	3	5	1	1	161.674	105.6	40.4	109.3	0.730094	NA	41	NA	173	1.2	2.6	249	7	1	NA	NA	2	1	2	2	0	600	NA	0	0	1	1	1	1	0	0	0	0	NA	0	0	NA	0.42	0.78	NA	0.742	1.886	NA
112330	2	37	4	4	3	1	169.586	115.9	40.3	138.6	0.905452	75	42	81	138	2.7	3.2	219	7.3	1	NA	NA	2	1	2	2	1	600	NA	0	1	1	1	0	0	0	0	0	0	NA	0	0	NA	5.46	5.43	NA	1.028	1.297	NA
113350	2	26	3	2	1	1	159.679	102.5	40.2	125.5	0.846321	NA	46	NA	137	2.3	5.8	190	6.4	1	NA	NA	2	1	3	2	0	60	NA	1	1	0	3	1	1	1	0	0	1	NA	0	0	NA	3.66	7.66	NA	1.908	2.027	NA
85354	2	45	4	3	1	1	166.318	111.2	40.2	127.8	0.844456	165	65	115	213	1.6	2.7	121	6.7	1	NA	NA	2	1	6	2	0	540	NA	0	0	2	2	0	0	0	0	0	1	NA	14	0	NA	0.79	0.57	NA	0.92	1.438	NA
110070	2	41	3	3	1	1	168.399	114	40.2	126.8	0.832656	141	41	70	139	3.8	5.6	325	7.1	1	NA	NA	1	1	4	1	0	360	NA	0	3	3	2	0	2	0	0	0	1	NA	0	0	NA	2.93	0.88	NA	1.814	1.247	NA
79760	2	35	4	4	1	2	166.468	111.4	40.2	124.4	0.821621	NA	52	NA	175	2.3	2.6	221	6.9	1	NA	NA	2	1	2	2	0	180	NA	0	0	0	0	0	0	0	0	0	NA	NA	0	0	NA	2.02	5.32	NA	2.092	2.338	NA
111155	2	45	4	4	1	1	157.956	100.3	40.2	116.2	0.787868	NA	NA	NA	NA	2	5.9	447	NA	3	NA	NA	2	1	5	2	0	240	NA	0	2	0	1	0	0	0	0	0	0	NA	0	0	NA	16.16	1.54	NA	1.133	1.218	NA
77620	2	28	3	4	1	1	159.991	102.9	40.2	112	0.754548	48	57	86	153	2.2	3.9	250	7	1	NA	NA	2	1	5	2	0	60	NA	0	0	0	0	0	0	0	0	0	NA	NA	0	0	NA	5.17	6.12	NA	1.106	2.367	NA
113801	2	45	3	4	1	1	161.893	105.1	40.1	125.3	0.840569	NA	54	NA	194	2.9	4.4	322	7.2	1	NA	NA	2	1	4	2	0	180	NA	1	1	1	2	1	2	0	0	0	1	NA	0	0	NA	3.03	0.65	NA	0.984	0.784	NA
84879	2	35	1	2	3	1	164.036	107.9	40.1	119.5	0.796408	NA	52	NA	196	4.3	7.2	405	7	1	NA	NA	2	1	3	2	0	480	NA	1	0	1	3	1	1	0	1	0	2	NA	0	0	NA	5.5	4.43	NA	1.243	1.843	NA
91592	2	25	4	3	1	1	159.41	101.9	40.1	117.1	0.791656	NA	70	NA	173	3.3	8.5	246	7	0	NA	NA	2	1	3	2	0	660	NA	1	0	0	2	1	0	0	0	0	0	NA	0	0	NA	3.73	2.94	NA	1.72	1.953	NA
124349	2	21	1	3	1	1	158.39	100.6	40.1	113	0.766394	28	48	75	129	2.9	4.8	206	6.7	1	NA	NA	2	1	3	2	0	120	NA	1	0	0	1	0	0	0	0	0	0	NA	0	0	NA	3.91	15.62	NA	1.43	2.995	NA
83491	2	39	4	2	1	1	175.713	123.5	40	128	0.825597	75	57	141	213	3.4	3.7	367	7.4	1	NA	NA	2	1	4	2	0	480	NA	0	0	0	0	0	0	0	0	0	NA	NA	0	0	NA	4.96	4.27	NA	1.32	1.405	NA
114062	2	33	5	4	3	1	156.924	98.5	40	120.8	0.824485	76	52	93	160	2.7	2.2	319	7.6	3	NA	NA	2	1	1	2	0	348	NA	0	0	1	0	0	0	0	0	0	0	NA	0	0	NA	3.7	10.2	NA	0.884	1.346	NA
77887	2	27	2	2	1	1	154.029	94.9	40	114.5	0.788795	NA	46	NA	161	2.8	5.6	305	6.8	1	NA	NA	2	1	2	2	0	300	NA	1	0	1	1	1	0	0	0	0	0	NA	0	0	NA	11.79	4.74	NA	1.33	1.764	NA
85243	2	43	2	4	3	1	161.941	104.9	40	116.9	0.785409	NA	35	NA	223	3.3	6.5	397	7	1	NA	NA	2	1	5	2	0	720	NA	3	3	3	3	1	1	3	0	0	2	NA	0	0	NA	2.64	2.41	NA	0.999	0.656	NA
93610	2	28	4	4	3	3	170.66	116.5	40	118.6	0.776208	NA	68	NA	155	4.2	5.9	243	7.7	0	NA	NA	2	1	2	2	0	300	NA	0	0	2	3	0	0	0	0	0	0	NA	0	0	NA	5.23	2.38	NA	1.962	1.306	NA
91317	2	36	4	4	3	3	176.644	124.5	39.9	121	0.779688	NA	54	NA	131	2.5	5.1	224	6.6	1	NA	NA	2	1	6	2	0	600	NA	0	0	0	0	0	0	0	0	0	NA	NA	0	12.7	NA	5.06	1.89	NA	1.767	2.369	NA
92510	2	33	3	4	1	1	164.271	107.4	39.8	127.7	0.854716	NA	35	NA	232	3.1	4.3	272	7.3	1	NA	NA	2	1	2	2	1	600	NA	2	0	0	1	0	0	0	0	0	0	NA	0	0	NA	2.45	0.87	NA	2.422	2.178	NA
78334	2	28	4	3	3	1	164.805	108.1	39.8	126.5	0.84531	73	46	160	221	1.4	2.1	323	6.4	1	NA	NA	2	1	2	2	0	300	NA	0	0	0	0	0	0	3	0	0	0	NA	0	0	NA	5.63	5.31	NA	1.902	0.927	NA
117637	2	36	3	3	3	1	168.499	113	39.8	127.2	0.84062	51	53	101	164	2.2	7.1	293	6.7	1	NA	NA	2	1	2	2	0	600	NA	1	1	0	1	1	1	0	0	1	1	NA	0	NA	NA	0.61	NA	NA	1.06	NA	NA
81659	2	38	1	4	2	1	162.734	105.4	39.8	116.7	0.784771	NA	45	NA	195	1.6	6	223	7	1	NA	NA	2	1	5	2	0	60	NA	0	1	0	0	1	1	0	1	0	0	NA	0	0	NA	2.23	1.49	NA	0.644	0.599	NA
78253	2	23	3	3	1	1	163.811	106.8	39.8	104.9	0.703096	148	40	101	171	1.6	6.7	298	7.6	1	NA	NA	2	1	1	2	1	360	NA	0	0	0	2	0	0	0	0	0	0	NA	0	0	NA	3.51	1.83	NA	0.789	0.576	NA
114647	2	44	4	5	1	1	157.275	98.2	39.7	126.6	0.867447	NA	68	NA	206	2.8	3.7	312	7	1	NA	NA	2	1	5	1	0	240	NA	1	1	3	3	0	0	0	0	0	1	NA	0	0	NA	0.97	1.59	NA	0.926	0.335	NA
89886	2	38	3	5	1	1	160.054	101.7	39.7	118.8	0.806907	NA	44	NA	220	2.5	5.3	248	7.1	1	NA	NA	2	1	3	1	0	600	NA	0	1	0	1	0	0	0	0	0	0	NA	14	0	NA	3.2	5.06	NA	1.038	1.094	NA
73763	2	31	2	4	1	1	160.917	102.8	39.7	105.5	0.714647	72	58	115	187	2.4	6.3	291	7.2	3	NA	NA	2	1	4	2	0	240	NA	0	0	0	0	0	0	0	0	0	NA	NA	0	0	NA	0.94	0.21	NA	1.2	1.029	NA
115668	2	34	1	3	1	3	157.072	97.7	39.6	122.8	0.84337	NA	39	NA	124	5.6	4.6	266	7.6	1	NA	NA	1	1	2	3	0	180	NA	0	0	1	2	0	0	0	0	0	0	NA	0	NA	NA	5.65	NA	NA	2.293	NA	NA
116119	2	37	1	4	1	1	159.069	100.2	39.6	121.3	0.827823	109	67	116	205	2.3	6.4	232	5.9	1	NA	NA	2	1	5	1	0	240	NA	0	0	0	0	0	0	0	0	0	NA	NA	0	0	NA	4.19	3.77	NA	1.965	0.841	NA
80583	2	24	4	4	3	1	165.831	108.9	39.6	119.6	0.799407	103	48	79	148	2.9	8.3	236	6.8	1	NA	NA	2	1	4	2	0	120	NA	1	1	1	2	1	1	1	0	0	0	NA	0	0	NA	3.27	4.29	NA	0.96	1.401	NA
124057	2	39	2	4	1	1	158.513	99.5	39.6	116.5	0.79646	NA	62	NA	175	2	6.3	378	7.2	0	NA	NA	2	1	3	2	1	660	NA	0	1	3	3	1	0	2	0	0	0	NA	0	0	NA	8.14	2.85	NA	2.334	1.599	NA
89919	2	40	1	2	3	3	162.369	104.4	39.6	114.1	0.770733	NA	43	NA	201	2.1	4.2	221	6.8	3	NA	NA	2	1	3	1	0	120	NA	0	0	0	0	0	0	0	0	0	NA	NA	0	0	NA	1.41	0.6	NA	0.764	0.475	NA
86460	2	37	3	4	1	1	167.347	110.9	39.6	113.8	0.757187	NA	59	NA	239	2.6	5	270	7.1	0	NA	NA	2	1	8	2	0	240	NA	0	0	0	0	0	0	0	0	0	NA	NA	0	0	NA	2.3	3.68	NA	1.531	0.531	NA
88216	2	28	4	2	1	1	150.756	90	39.6	104.4	0.731869	NA	52	NA	131	3.2	2.5	169	7.5	1	NA	NA	2	1	4	2	0	360	NA	0	1	0	2	0	0	0	0	0	1	NA	0	0	NA	2.02	0.33	NA	0.825	0.322	NA
112881	2	42	4	4	3	1	162.885	104.8	39.5	128.5	0.868089	NA	40	NA	244	2.5	3.2	314	7	1	NA	NA	1	1	4	2	0	360	NA	0	2	3	2	1	0	0	1	0	0	NA	0	29.8	NA	3.81	11.22	NA	2.461	5.669	NA
121255	2	33	4	3	1	1	176.678	123.3	39.5	130.8	0.848434	49	75	84	169	2.8	6.4	331	6.6	1	NA	NA	2	1	3	2	0	420	NA	0	1	0	0	1	0	0	0	0	0	NA	10.8	80.6	NA	9.28	7.16	NA	2.895	4.478	NA
77774	2	25	3	4	1	1	164.586	107	39.5	124.2	0.834693	NA	NA	NA	NA	3.9	8.7	293	NA	1	NA	NA	2	1	2	2	0	120	NA	0	0	0	0	0	0	0	0	0	NA	NA	0	0	NA	4.17	3.53	NA	0.766	0.683	NA
123606	2	31	5	3	3	1	171.147	115.7	39.5	123.6	0.814585	NA	32	NA	172	2.9	6.9	818	6.7	0	NA	NA	2	1	6	2	0	348	NA	1	0	0	3	1	0	0	0	0	0	NA	0	NA	NA	3.38	NA	NA	1.223	NA	NA
82450	2	34	1	3	1	1	156.787	97.1	39.5	114.7	0.789787	50	60	100	170	2.2	2.9	199	7	1	NA	NA	2	1	4	2	0	180	NA	0	0	0	1	0	0	0	0	0	0	NA	0	0	NA	11.63	2.7	NA	4.679	1.285	NA
120598	2	29	4	4	1	1	164.432	106.8	39.5	116.6	0.783984	NA	37	NA	164	1.9	1.5	373	7.3	1	NA	NA	2	1	4	2	0	540	NA	0	0	1	0	0	0	0	0	0	0	NA	22.2	0	NA	4.84	1.99	NA	4.213	1.876	NA
112650	2	43	5	4	1	1	162.652	104.5	39.5	114.6	0.774741	97	45	176	240	2	3.6	278	6.5	1	NA	NA	2	1	3	1	0	300	NA	0	0	0	3	1	0	0	0	0	0	NA	0	0	NA	1.55	8.72	NA	1.297	2.419	NA
92397	2	32	2	2	1	3	159.949	100.8	39.4	131.1	0.895256	NA	69	NA	220	1.7	6	201	6.8	0	NA	NA	2	1	10	2	1	180	NA	0	1	1	2	0	0	0	1	0	0	NA	0	0	NA	6.56	3.23	NA	1.901	2.374	NA
87007	2	45	3	4	1	1	164.409	106.5	39.4	122.2	0.823083	247	33	186	268	2.5	5.3	198	6.2	1	NA	NA	2	1	2	1	1	240	NA	0	0	0	0	0	0	0	0	0	NA	NA	0	NA	NA	3.49	NA	NA	1.141	NA	NA
82425	2	43	4	4	2	1	172.397	117.1	39.4	119	0.78274	NA	46	NA	174	2.7	1.7	213	7.3	3	NA	NA	2	1	3	2	0	120	NA	0	0	3	1	1	0	0	0	0	0	NA	0	0	NA	3.52	9.24	NA	1.678	4.557	NA
75908	2	24	4	4	3	1	164.178	106.2	39.4	112.3	0.756935	NA	42	NA	149	2.7	4.2	326	6.8	1	NA	NA	2	1	1	2	0	300	NA	0	1	0	1	0	0	0	0	0	1	NA	0	0	NA	0.18	4.38	NA	0.867	4.753	NA
118409	2	37	3	5	1	2	163.713	105.6	39.4	109	0.735733	47	66	95	170	2.2	3.4	262	6.7	0	NA	NA	2	1	1	2	0	180	NA	2	2	3	3	3	1	1	0	0	1	NA	0	0	NA	3.59	3.66	NA	1.154	2.148	NA
91622	2	34	1	2	3	1	164.927	106.9	39.3	119.7	0.806342	NA	35	NA	169	2	6.8	255	7.2	1	NA	NA	2	1	3	2	0	360	NA	0	1	1	2	2	2	1	0	0	1	NA	0	0	NA	2.33	1.5	NA	0.726	1.098	NA
88351	2	41	3	4	3	1	162.518	103.8	39.3	118.8	0.806189	NA	46	NA	159	5.4	8.6	443	7.5	1	NA	NA	2	1	3	1	0	300	NA	3	3	3	3	3	2	3	2	2	3	NA	149.6	0	NA	1.13	2.6	NA	0.523	0.585	NA
88164	2	45	2	4	1	1	158.556	98.8	39.3	113.8	0.781849	238	37	117	202	4	5.3	225	6.8	0	NA	NA	1	1	4	2	0	600	NA	0	0	0	3	2	0	0	0	0	0	NA	0	0	NA	2.9	1.8	NA	2.066	0.294	NA
111534	2	32	2	3	3	1	157.832	97.9	39.3	110.1	0.758161	NA	41	NA	188	2.6	3.1	212	7.1	3	NA	NA	2	1	2	2	0	120	NA	0	1	0	0	0	0	0	0	0	0	NA	0	0	NA	0.56	0.32	NA	0.874	0.652	NA
80466	2	25	2	4	1	3	159.037	99.4	39.3	107.4	0.736762	92	122	96	236	3.1	14.4	252	6.4	3	NA	NA	2	1	1	2	0	480	NA	0	0	0	0	0	0	0	0	0	NA	NA	0	0	NA	6.59	2.27	NA	3.256	2.128	NA
85337	2	43	4	4	3	2	158.678	98.7	39.2	118.7	0.816587	NA	87	NA	208	3.1	3.5	331	7.6	1	NA	NA	2	1	1	2	0	600	NA	0	0	3	1	0	0	0	0	0	0	NA	0	0	NA	0.89	0.45	NA	0.838	1.351	NA
111397	2	29	2	2	3	1	157.872	97.7	39.2	116	0.800046	116	47	114	184	1.6	4.7	280	6.9	3	NA	NA	2	1	5	2	0	240	NA	0	0	0	0	0	0	0	0	0	NA	NA	0	NA	NA	1.71	NA	NA	0.301	NA	NA
120696	2	39	4	3	2	1	165.6	107.5	39.2	117.2	0.789235	NA	51	NA	150	2.7	8.1	503	7	1	NA	NA	2	1	4	2	0	30	NA	1	1	1	3	3	1	1	2	0	1	NA	0	0	NA	2.75	1.45	NA	1.61	1.32	NA
88625	2	33	4	4	3	1	159.639	99.9	39.2	113.1	0.775715	78	51	97	164	2.3	2.6	233	7.1	1	NA	NA	2	1	1	2	0	480	NA	0	0	0	0	0	0	0	0	0	NA	NA	0	0	NA	1.99	4.84	NA	0.992	2.626	NA
111985	2	42	4	3	1	1	165.985	108	39.2	111.6	0.750653	NA	NA	NA	NA	NA	NA	NA	NA	1	NA	NA	2	1	3	2	0	180	NA	0	0	0	1	0	0	0	0	0	0	NA	14.4	0	NA	3.14	3.84	NA	0.724	1.24	NA
120160	2	27	4	4	3	1	163.975	105.4	39.2	108.7	0.735614	65	47	114	174	2.3	2.3	397	6.6	1	NA	NA	2	1	2	2	0	120	NA	0	0	0	0	0	0	0	0	0	NA	NA	0	21	NA	1.94	2.8	NA	0.67	2.065	NA
109563	2	36	1	4	1	1	168.717	111.3	39.1	132.2	0.883488	NA	NA	NA	NA	1.9	4.7	322	NA	1	NA	NA	1	1	2	1	1	120	NA	0	0	0	1	0	0	0	0	0	0	NA	0	NA	NA	34.24	NA	NA	11.131	NA	NA
92846	2	23	3	3	3	1	161.515	102	39.1	123.6	0.844231	116	46	104	173	2.5	3.5	276	7.9	3	NA	NA	2	1	2	2	0	480	NA	2	1	3	2	0	1	1	2	0	1	NA	0	0	NA	5.52	2.91	NA	1.839	1.726	NA
121565	2	24	4	4	1	1	163.482	104.5	39.1	120.6	0.818769	NA	45	NA	161	2.7	4.9	351	8	0	NA	NA	2	1	2	2	0	600	NA	0	0	0	0	0	0	0	0	0	NA	NA	0	0	NA	1.84	3.99	NA	1.29	2.703	NA
112720	2	29	4	4	1	1	167.881	110.2	39.1	118.8	0.79591	NA	57	NA	186	2.1	2.4	207	7.6	1	NA	NA	2	1	5	2	0	60	NA	0	0	0	1	0	0	0	0	0	0	NA	0	0	NA	2.77	2.6	NA	2.681	2.34	NA
113820	2	35	3	3	3	1	166.735	108.7	39.1	117.4	0.78923	50	41	104	155	2	5	266	6.8	1	NA	NA	2	1	2	2	0	360	NA	2	0	1	3	2	0	1	0	0	1	NA	0	6	NA	2.08	5.61	NA	0.519	2.918	NA
113788	2	25	4	5	1	1	170.376	113.5	39.1	117.3	0.780085	51	59	85	154	1.6	3.9	287	7	1	NA	NA	2	1	1	2	0	660	NA	0	1	1	1	1	1	0	0	0	1	NA	10.8	0	NA	7.21	3.55	NA	2.635	1.366	NA
109284	2	44	1	2	1	3	152.641	91.1	39.1	103.1	0.724389	NA	60	NA	212	3.2	5.7	383	7.3	3	NA	NA	2	1	5	1	0	360	NA	0	0	0	0	0	0	0	0	0	NA	NA	0	0	NA	4.96	6.87	NA	1.368	2.77	NA
88818	2	28	1	3	1	1	151.742	89.8	39	122.4	0.86401	NA	48	NA	221	2.7	5.1	351	7.1	0	NA	NA	2	1	2	2	0	300	NA	0	0	1	1	3	0	0	0	0	0	NA	0	0	NA	1.73	5.73	NA	1.28	2.521	NA
109730	2	29	4	4	3	1	162.985	103.6	39	122	0.830953	61	49	85	146	2.3	2.3	293	7.7	1	NA	NA	2	1	5	2	1	240	NA	0	1	1	1	1	1	0	0	0	1	NA	0	0	NA	2.08	5.06	NA	1.14	1.52	NA
84948	2	41	4	5	3	1	162.512	103	39	117	0.798055	87	63	83	163	1.7	4.7	213	7.4	3	NA	NA	2	1	3	2	0	240	NA	0	0	0	1	0	0	1	0	0	0	NA	0	0	NA	1.41	6.58	NA	1.61	3.389	NA
85075	2	41	2	3	1	1	144.559	81.5	39	110.2	0.796982	115	52	140	215	2.5	7	458	7.4	3	NA	NA	2	1	3	2	0	120	NA	0	0	0	0	0	0	0	0	0	NA	NA	NA	NA	NA	NA	NA	NA	NA	NA	NA
90113	2	27	4	4	3	1	164.706	105.8	39	115.4	0.781881	103	44	189	254	3.4	6.1	323	5.9	1	NA	NA	2	1	1	2	0	600	NA	0	0	0	1	0	0	0	0	0	0	NA	0	NA	NA	2.81	NA	NA	1.362	NA	NA
92804	2	37	4	4	1	1	169.161	111.6	39	116.5	0.778872	NA	56	NA	227	1.8	5.4	248	7.1	1	NA	NA	2	1	2	2	0	240	NA	1	1	1	1	1	1	0	0	0	0	NA	0	NA	NA	9.91	NA	NA	2.503	NA	NA
77858	2	37	3	2	3	1	155.827	94.7	39	110.9	0.772504	NA	68	NA	247	2.3	6.3	366	7.5	0	NA	NA	2	1	3	2	0	480	NA	0	0	0	0	0	0	0	0	0	NA	NA	0	0	NA	1.71	5.87	NA	0.623	1.165	NA
89562	2	34	4	2	1	1	168.781	111.1	39	113.4	0.758999	NA	50	NA	179	4.4	3.9	265	7.1	1	NA	NA	2	1	1	2	0	420	NA	0	0	2	0	0	0	1	0	0	0	NA	0	0	NA	1.85	0.89	NA	1.056	1.022	NA
87598	2	27	2	1	1	3	155.002	93.7	39	102.7	0.717285	110	50	96	168	1.6	8.1	277	7.6	3	NA	NA	2	1	4	2	0	180	NA	0	1	2	1	3	0	1	0	0	0	NA	0	0	NA	2.82	2.78	NA	1.417	1.314	NA
110606	2	33	3	3	1	2	161.166	101.3	39	101.2	0.693162	121	48	101	173	3	3.6	407	7.1	1	NA	NA	2	1	2	2	0	600	NA	0	0	3	1	0	0	1	0	0	0	NA	1.8	0	NA	3.7	0	NA	0.884	0.04	NA
115680	2	28	3	5	3	1	168.007	109.8	38.9	119.5	0.803042	73	58	129	202	1.6	4	265	6.7	1	NA	NA	2	1	1	2	0	420	NA	0	1	1	1	0	0	0	0	0	1	NA	32.5	NA	NA	3.77	NA	NA	3.649	NA	NA
119953	2	29	4	3	3	1	168.998	111.1	38.9	118.9	0.796662	NA	49	NA	125	2.3	2.6	237	7.7	1	NA	NA	2	1	4	2	0	180	NA	0	0	3	2	0	0	0	0	0	0	NA	0	0	NA	4.22	1.92	NA	0.976	1.019	NA
91332	2	26	4	3	3	3	173.279	116.8	38.9	117.6	0.778158	NA	47	NA	135	1.6	3.9	122	5.8	0	NA	NA	2	1	8	2	0	300	NA	0	0	0	0	0	0	0	0	0	NA	NA	0	0	NA	17.13	5.33	NA	9.028	1.359	NA
83971	2	26	3	4	1	1	167.547	109.2	38.9	112.4	0.756365	NA	59	NA	190	2.5	9.6	272	6.5	0	NA	NA	3	1	2	2	0	720	NA	0	0	0	2	0	0	0	0	0	0	NA	0	0	NA	2.76	4.97	NA	1.065	2.439	NA
111317	2	45	1	3	1	1	155.615	94.2	38.9	106.5	0.743632	NA	54	NA	245	2	3.8	315	7.7	1	NA	NA	3	1	5	1	0	360	NA	0	0	0	0	0	0	0	0	0	NA	NA	0	0	NA	2.67	0.92	NA	0.823	0.803	NA
119608	2	24	4	5	3	1	162.8	103.1	38.9	107	0.730449	53	57	91	159	2.7	3	237	7.3	1	NA	NA	2	1	1	2	0	240	NA	0	0	3	3	2	0	0	0	0	0	NA	0	0	NA	2.01	0.91	NA	0.853	0.554	NA
88721	2	42	4	5	1	1	153.901	91.9	38.8	120.1	0.844697	58	51	80	143	3.2	4.5	298	7.7	1	NA	NA	3	1	6	1	0	180	NA	0	0	0	0	0	0	0	0	0	NA	NA	0	0	NA	2.14	1.24	NA	0.814	1.152	NA
115950	2	44	3	3	2	1	160.941	100.5	38.8	119.8	0.823952	NA	76	NA	221	3	5.1	180	6.9	1	NA	NA	2	1	4	2	0	360	NA	1	2	1	2	1	1	1	0	0	1	NA	0	0	NA	4.76	10.06	NA	2.448	2.857	NA
87645	2	42	3	2	1	1	164.348	104.8	38.8	121	0.823535	NA	38	NA	190	2.1	8.4	203	6.9	1	NA	NA	1	1	4	1	0	600	NA	0	0	1	1	1	0	1	0	0	0	NA	0	0	NA	3.65	1.9	NA	1.076	1.551	NA
74787	2	45	3	4	3	1	159.816	99.1	38.8	119	0.821326	214	56	101	200	2.8	7.7	309	6.5	1	NA	NA	2	1	11	1	0	480	NA	0	0	1	1	1	0	0	1	0	1	NA	47.5	47.5	NA	0.12	5.87	NA	0.411	2.294	NA
123440	2	39	5	3	1	1	168.835	110.6	38.8	120.1	0.806475	130	69	163	258	1.1	2.5	249	6.5	1	NA	NA	2	1	5	2	0	360	NA	0	0	0	0	0	0	0	0	0	NA	NA	57.6	15.9	NA	3.16	27.08	NA	1.973	6.766	NA
110581	2	40	3	2	1	1	161.181	100.8	38.8	116.9	0.803408	171	31	125	190	2.1	8.4	258	7.3	0	NA	NA	2	1	3	2	0	180	NA	0	0	1	1	2	0	0	0	0	0	NA	0	0	NA	0.41	5.86	NA	0.099	2.181	NA
90528	2	40	3	4	1	1	157.542	96.3	38.8	113.5	0.788998	NA	58	NA	195	2.7	5.5	217	7.6	1	NA	NA	2	1	3	2	0	180	NA	0	0	0	0	0	0	0	0	0	NA	NA	0	0	NA	0.72	0.93	NA	0.162	1.759	NA
119672	2	24	4	2	1	1	154.486	92.6	38.8	105.1	0.737797	NA	73	NA	153	2	4.1	351	7	1	NA	NA	2	1	5	2	0	120	NA	2	1	2	2	1	0	0	0	0	0	NA	65.5	14	NA	5.55	8.17	NA	1.487	2.207	NA
114239	2	20	4	2	1	1	150.086	87.4	38.8	103	0.733578	NA	54	NA	160	3.2	7.5	286	7.6	3	NA	NA	2	1	3	2	0	2	NA	0	0	3	0	0	0	0	0	0	1	NA	0	0	NA	3.39	1.84	NA	0.66	0.781	NA
91138	2	35	4	4	1	1	170.279	112.5	38.8	108.5	0.725485	NA	76	NA	160	3.4	4.8	210	7.1	1	NA	NA	2	1	4	2	0	300	NA	0	0	2	1	0	0	0	0	0	0	NA	0	NA	NA	5.03	NA	NA	2.607	NA	NA
82810	2	41	5	4	1	1	164.325	104.5	38.7	125.2	0.853648	NA	42	NA	227	3.2	4.7	279	7.9	1	NA	NA	1	1	2	2	0	720	NA	0	0	0	2	0	0	0	0	0	0	NA	0	0	NA	4.11	3.26	NA	2.895	2.461	NA
92497	2	29	1	1	1	3	140.229	76.1	38.7	106.8	0.788277	147	46	116	191	2	5.1	248	7.1	3	NA	NA	2	1	3	2	0	240	NA	0	0	0	0	0	0	0	0	0	NA	NA	0	NA	NA	0.67	NA	NA	1.12	NA	NA
80309	2	44	1	3	1	3	157.746	96.3	38.7	111.1	0.773146	NA	31	NA	175	2.8	5.2	208	7.1	3	NA	NA	2	1	4	2	0	480	NA	0	0	0	0	0	0	0	0	0	NA	NA	0	0	NA	2.06	2.94	NA	2	1.693	NA
115902	2	31	1	1	1	1	162.268	101.9	38.7	112.5	0.771903	NA	75	NA	149	2.3	4.8	281	6.7	1	NA	NA	2	1	4	2	0	120	NA	0	0	0	0	0	0	0	0	0	NA	NA	0	0	NA	0.84	7.79	NA	1.49	1.612	NA
119394	2	37	5	5	1	2	163.378	103.3	38.7	95.6	0.653712	53	59	110	180	2.2	3.2	256	7.1	1	NA	NA	2	1	1	2	1	180	NA	0	0	0	0	0	0	0	0	0	NA	NA	0	0	NA	2.21	2.27	NA	0.956	0.952	NA
91253	2	44	3	3	1	1	159.744	98.5	38.6	120.7	0.836123	97	53	98	170	2.7	8.3	365	7.2	1	NA	NA	2	1	3	2	0	240	NA	0	0	0	1	0	0	0	0	0	0	NA	0	0	NA	1.28	1.98	NA	0.94	1.29	NA
80851	2	35	3	4	3	1	169.501	110.9	38.6	120.5	0.810356	NA	61	NA	169	2.7	6	376	7	1	NA	NA	2	1	2	2	0	480	NA	0	0	0	1	0	0	0	0	0	0	NA	0	0	NA	1.54	0.95	NA	0.471	1.185	NA
114546	2	45	1	2	1	1	165.558	105.8	38.6	114.6	0.779803	60	47	143	202	3	4.2	355	6.9	3	NA	NA	2	1	3	2	0	120	NA	0	0	0	0	0	0	0	0	0	NA	NA	0	0	NA	1.94	3.73	NA	0.681	2.504	NA
74481	2	35	4	3	3	3	168.812	110	38.6	110.4	0.743948	NA	42	NA	191	1.6	2	186	7.3	1	NA	NA	2	1	5	1	0	480	NA	0	0	0	0	0	0	0	0	0	NA	NA	0	0	NA	2.22	0.21	NA	2.982	1.722	NA
80087	2	30	4	4	1	1	161.839	101.1	38.6	102.2	0.703372	NA	48	NA	230	2.2	3.4	273	7.6	1	NA	NA	2	1	3	2	0	600	NA	0	0	0	0	0	0	0	0	0	NA	NA	0	0	NA	1.2	1.98	NA	2.374	0.573	NA
124691	2	25	3	3	2	1	159.789	98.3	38.5	128.7	0.892959	NA	47	NA	167	1.4	4.8	266	6.6	1	NA	NA	2	1	2	1	0	240	NA	2	1	2	3	2	3	0	0	0	0	NA	0	0	NA	14.58	6.3	NA	4.138	1.349	NA
116426	2	43	4	4	3	1	168.415	109.2	38.5	124	0.838026	NA	44	NA	148	3.5	2.2	356	7	1	NA	NA	2	1	11	1	1	240	NA	0	0	1	0	0	0	1	1	0	0	NA	0	0	NA	10.85	2.83	NA	4.498	0.58	NA
81119	2	37	2	3	1	1	164.514	104.2	38.5	117.5	0.803456	127	63	112	200	2.8	7.1	362	6.9	1	NA	NA	2	1	3	1	0	600	NA	3	0	0	2	0	0	0	0	0	0	NA	0	0	NA	6.68	3.31	NA	3.189	1.346	NA
113577	2	42	4	4	2	1	177.428	121.2	38.5	118.2	0.778275	51	52	122	184	2.5	4.9	393	7.6	1	NA	NA	2	1	3	2	1	120	NA	1	1	0	2	0	0	1	1	0	0	NA	0	0	NA	3.79	1.76	NA	1.652	0.748	NA
81715	2	42	3	2	1	3	160.519	99.2	38.5	110.8	0.767014	264	35	121	209	2.5	8.2	341	6.9	0	NA	NA	2	1	2	2	0	480	NA	1	1	3	1	0	0	1	0	0	1	NA	0	0	NA	2.84	5.54	NA	2.639	2.147	NA
91291	2	32	5	3	1	1	163.857	103.1	38.4	127.9	0.877845	NA	58	NA	182	1.8	2.6	332	6.9	1	NA	NA	1	1	3	1	0	360	NA	1	1	1	2	2	0	0	0	0	0	NA	0	NA	NA	1.11	NA	NA	0.463	NA	NA
73985	2	43	2	2	1	1	165.202	104.8	38.4	125	0.85444	NA	44	NA	134	3.1	6.6	303	7.4	0	NA	NA	1	1	1	2	1	360	NA	0	0	0	1	0	0	0	0	0	0	NA	0	0	NA	9.81	3.29	NA	5.125	1.323	NA
124373	2	27	4	2	3	1	160.646	99.1	38.4	119.3	0.826959	50	28	107	145	4.9	3.3	294	6.9	3	NA	NA	2	1	2	2	0	180	NA	0	0	0	0	0	0	0	0	0	NA	NA	0	0	NA	3.11	3.7	NA	1.12	2.226	NA
79436	2	28	4	4	3	1	159.671	97.9	38.4	118.1	0.821138	NA	NA	NA	NA	NA	NA	NA	NA	1	NA	NA	2	1	3	2	1	360	NA	0	1	0	2	0	0	0	0	0	0	NA	NA	NA	NA	NA	NA	NA	NA	NA	NA
91788	2	42	1	5	1	1	161.132	99.7	38.4	115.9	0.80218	NA	45	NA	185	3.2	7.9	248	7.2	1	NA	NA	2	1	3	2	0	240	NA	0	0	1	1	1	0	0	0	0	0	NA	41	0	NA	3.11	2.13	NA	0.867	2.633	NA
84542	2	31	1	4	1	1	163.459	102.6	38.4	113.4	0.77927	NA	NA	NA	NA	NA	NA	NA	NA	1	NA	NA	2	1	3	2	0	480	NA	0	3	3	3	3	3	3	0	0	2	NA	112.3	0	NA	4.92	1.38	NA	2.551	0.554	NA
90062	2	34	4	2	3	1	175.079	117.4	38.3	121.1	0.805492	NA	44	NA	146	2.8	7	329	7.3	1	NA	NA	2	1	8	2	0	480	NA	3	3	3	3	2	3	3	0	2	3	NA	0	0	NA	2	1.09	NA	2.936	0.957	NA
119429	2	26	4	3	3	1	168.002	108.1	38.3	115.3	0.782901	79	38	134	188	4.7	4.1	281	7.4	1	NA	NA	2	1	3	2	0	360	NA	0	0	0	0	0	0	0	0	0	NA	NA	0	9.6	NA	5.09	10.15	NA	2.334	3.946	NA
83103	2	32	4	4	3	1	161.261	99.6	38.3	112	0.776224	NA	44	NA	219	2.1	3.3	300	7.3	1	NA	NA	3	1	6	1	0	240	NA	0	0	1	1	1	0	0	0	0	0	NA	0	0	NA	2.39	4.17	NA	1.898	1.463	NA
76342	2	43	1	4	1	1	164.706	103.9	38.3	112.9	0.774237	56	57	84	152	2.4	3.6	221	6.5	1	NA	NA	2	1	4	2	0	180	NA	2	0	0	0	0	0	0	0	0	0	NA	0	0	NA	5.14	4.46	NA	2.334	1.619	NA
85399	2	35	3	4	1	1	165.317	104.4	38.2	128.2	0.879063	69	50	130	194	1.8	5.8	239	6.4	1	NA	NA	2	1	3	2	0	180	NA	0	0	0	1	1	0	0	0	0	0	NA	0	NA	NA	0.51	NA	NA	0.702	NA	NA
91155	2	44	4	5	1	2	158.197	95.6	38.2	108.2	0.758437	NA	59	NA	182	2.2	4.7	287	7	1	NA	NA	2	1	2	2	0	420	NA	0	1	2	1	1	0	2	0	0	0	NA	84.1	0	NA	1.5	9.65	NA	0.833	1.957	NA
109390	2	44	4	5	1	1	166.658	106.1	38.2	111	0.758056	NA	38	NA	185	2.3	6.9	340	7	1	NA	NA	1	1	2	1	0	960	NA	1	0	1	1	1	0	0	0	0	0	NA	0	34.6	NA	2.41	0.99	NA	1.303	1.432	NA
119485	2	21	3	2	1	1	162.897	101.1	38.1	126.8	0.87743	87	63	102	182	1.5	5.1	260	6.9	1	NA	NA	2	1	2	2	1	360	NA	0	0	0	1	1	0	0	0	0	0	NA	0	0	NA	5.51	1.08	NA	2.138	1.031	NA
119201	2	25	1	4	1	1	161.603	99.5	38.1	119.6	0.830915	NA	39	NA	163	3.5	4.5	246	6.9	1	NA	NA	3	1	5	2	0	120	NA	1	1	2	2	1	1	0	1	0	1	NA	37	0	NA	6.93	8.63	NA	2.42	1.605	NA
120130	2	25	5	4	1	1	151.545	87.5	38.1	115	0.825044	NA	67	NA	187	2.3	9.8	227	6.6	1	NA	NA	2	1	3	2	1	300	NA	0	0	0	2	0	0	0	0	0	0	NA	0	0	NA	3.26	2.96	NA	1.474	1.501	NA
113384	2	40	4	5	1	1	159.642	97.1	38.1	116.8	0.816431	59	53	145	210	2.4	3.6	269	7.3	3	NA	NA	2	1	7	1	0	120	NA	0	0	0	0	0	0	0	0	0	NA	NA	0	0	NA	2.28	0.45	NA	1.988	0.319	NA
116269	2	34	3	5	1	1	171.377	111.9	38.1	120.7	0.814294	48	55	96	161	2.1	4.5	372	7.4	1	NA	NA	2	1	2	2	1	420	NA	0	0	1	1	0	0	0	0	0	0	NA	14	14	NA	1.47	0.75	NA	1.663	0.467	NA
84192	2	27	2	4	1	1	149.452	85.1	38.1	112	0.809127	NA	55	NA	171	2.4	4.5	284	7	3	NA	NA	2	1	2	2	0	600	NA	0	0	0	0	0	0	0	0	0	NA	NA	12.3	0	NA	3.58	1.19	NA	1.033	0.588	NA
89929	2	31	4	4	3	1	165.534	104.4	38.1	115.9	0.79559	NA	52	NA	154	3.2	2.7	265	7	1	NA	NA	2	1	5	2	0	240	NA	0	0	0	1	0	0	0	0	0	0	NA	0	0	NA	5.7	1.83	NA	2.605	1.226	NA
78676	2	39	4	5	1	2	165.772	104.7	38.1	113.5	0.778557	NA	48	NA	219	3.3	3.2	250	7.1	1	NA	NA	2	1	4	2	1	300	NA	1	1	2	3	3	1	1	0	0	1	NA	0	0	NA	2.15	3.08	NA	1.812	1.713	NA
81475	2	42	3	4	2	1	161.765	99.7	38.1	107.8	0.748559	NA	64	NA	149	1.7	2.8	216	7	1	NA	NA	2	1	6	2	0	540	NA	1	1	1	1	1	1	0	0	0	2	NA	0	28.1	NA	2.05	4.62	NA	0.468	1.409	NA
118482	2	38	3	4	1	1	161.846	99.8	38.1	106.3	0.737958	NA	39	NA	180	1.8	6.2	286	6.7	1	NA	NA	2	1	5	2	0	1080	NA	2	2	3	3	1	1	3	1	0	3	NA	0	0	NA	6.19	3.02	NA	1.729	1.921	NA
120717	2	36	4	4	2	1	168.13	107.7	38.1	107.2	0.730167	39	52	98	158	3.1	3.5	198	7.7	1	NA	NA	2	1	6	2	0	600	NA	0	0	0	3	0	0	0	0	0	0	NA	0	0	NA	1.57	7.45	NA	3.171	1.763	NA
87721	2	45	4	4	3	3	158.695	95.7	38	122.9	0.863139	82	36	127	179	1.9	4.1	228	7.2	0	NA	NA	2	1	2	1	0	360	NA	0	0	0	0	0	0	0	0	0	NA	NA	0	0	NA	0.76	0.48	NA	0.755	0.908	NA
79155	2	30	3	4	1	1	162.221	100	38	123.3	0.856485	121	35	113	172	2.8	6.4	257	6.7	1	NA	NA	2	1	4	2	0	480	NA	0	0	0	0	0	0	0	0	0	NA	NA	0	NA	NA	1.9	NA	NA	3.024	NA	NA
110527	2	39	4	2	3	1	164.157	102.4	38	115.7	0.798942	82	52	85	153	1.8	2	255	7.5	0	NA	NA	2	1	1	2	0	20	NA	1	2	1	1	1	2	1	1	0	1	NA	0	0	NA	1.43	0.47	NA	1.065	0.979	NA
75140	2	34	3	3	3	1	156.815	93.2	37.9	123	0.870532	NA	30	NA	196	3.9	8.9	309	7.1	1	NA	NA	2	1	3	1	0	480	NA	0	2	0	3	3	0	0	0	0	0	NA	0	0	NA	0.13	10.29	NA	0.958	3.464	NA
88348	2	26	2	3	3	1	165.811	104.2	37.9	118.2	0.81355	NA	75	NA	174	3.8	6.6	239	7.4	1	NA	NA	2	1	1	2	0	348	NA	1	1	3	1	2	0	0	0	0	0	NA	46.8	NA	NA	5.74	NA	NA	2.235	NA	NA
92083	2	23	5	2	3	1	164.854	103	37.9	115.8	0.799343	NA	NA	NA	NA	NA	NA	NA	NA	1	NA	NA	2	1	3	2	0	540	NA	0	0	2	2	2	0	0	0	0	0	NA	0	0	NA	4.02	1.08	NA	2.001	1.89	NA
121030	2	29	1	3	1	1	149.67	84.9	37.9	107.2	0.776607	NA	42	NA	176	3.1	4.3	370	7.1	3	NA	NA	2	1	2	2	0	60	NA	0	0	0	0	0	0	0	0	0	NA	NA	0	0	NA	3.94	7.94	NA	1.541	1.864	NA
89911	2	32	2	5	3	2	159.65	96.6	37.9	106.4	0.74633	NA	61	NA	186	2.6	8.1	223	7.2	1	NA	NA	2	1	1	2	0	360	NA	1	1	1	1	0	0	1	0	0	1	NA	0	0	NA	4.82	2.36	NA	1.354	2.873	NA
118762	2	34	4	3	3	1	178.323	120.2	37.8	126	0.837734	NA	35	NA	135	2	3.7	130	6.5	1	NA	NA	2	1	3	2	0	600	NA	0	0	0	1	0	0	0	0	0	0	NA	NA	NA	NA	NA	NA	NA	NA	NA	NA
122955	2	31	4	4	1	1	166.587	104.9	37.8	114.1	0.78488	79	41	131	188	2.3	5.7	308	7	1	NA	NA	2	1	4	2	0	720	NA	1	0	1	1	1	0	0	0	0	0	NA	0	0	NA	5.91	1.64	NA	2.811	1.442	NA
82638	2	29	4	3	3	1	159.861	96.6	37.8	109.6	0.769623	119	50	105	179	2.4	4.4	370	7	1	NA	NA	2	1	1	2	0	780	NA	0	0	1	1	1	0	0	0	0	0	NA	0	0	NA	0.16	0	NA	0.257	0.363	NA
90931	2	35	1	5	3	1	164.51	102.3	37.8	106.1	0.734443	208	45	108	195	3.5	3.5	335	6.9	1	NA	NA	2	1	2	2	0	660	NA	1	1	1	1	2	0	0	0	0	0	NA	0	0	NA	2.69	0.79	NA	2.383	0.312	NA
86260	2	26	3	3	1	1	161.146	97.9	37.7	111.6	0.781915	NA	32	NA	289	3.3	4.3	279	6.6	1	NA	NA	2	1	2	2	0	180	NA	2	1	1	3	0	0	0	0	0	1	NA	0	0	NA	5.41	13.69	NA	3.116	3.991	NA
88082	2	44	3	4	1	1	163.84	101.2	37.7	112.1	0.778936	NA	42	NA	200	3.4	6.3	265	6.5	1	NA	NA	2	1	2	2	0	540	NA	1	0	1	1	1	0	0	0	0	0	NA	0	0	NA	17.62	6.57	NA	4.784	2.384	NA
121641	2	44	3	4	1	1	157.82	93.9	37.7	110	0.778785	163	61	89	183	1.5	4.9	323	7.5	1	NA	NA	2	1	4	2	0	480	NA	0	0	0	1	0	0	0	0	0	0	NA	NA	NA	NA	NA	NA	NA	NA	NA	NA
87769	2	37	5	3	3	1	156.3	92.1	37.7	101.2	0.719957	110	50	95	167	2	4.2	187	7.1	1	NA	NA	2	1	3	2	0	840	NA	1	1	0	3	1	1	0	0	0	1	NA	0	0	NA	8.52	6.39	NA	4.266	1.102	NA
79645	2	23	3	3	1	1	167.268	105.2	37.6	119.4	0.822569	107	33	128	182	2.9	5.9	324	7.6	0	NA	NA	2	1	1	2	0	300	NA	0	0	0	3	0	0	0	0	0	0	NA	0	0	NA	5.09	2.34	NA	1.444	1.479	NA
73735	2	29	2	1	3	1	154.713	90	37.6	104.4	0.747845	NA	47	NA	130	2.4	6.7	402	7.3	3	NA	NA	2	1	2	2	0	60	NA	1	0	0	0	0	0	0	0	0	0	NA	0	0	NA	0.95	0.96	NA	0.184	0.505	NA
80520	2	40	4	4	3	1	166.453	103.9	37.5	126	0.871707	NA	70	NA	157	2.9	5.2	288	6.6	1	NA	NA	2	1	2	2	1	120	NA	0	0	2	0	2	0	0	1	0	0	NA	0	NA	NA	4.17	NA	NA	0.615	NA	NA
74243	2	33	1	4	1	1	168.523	106.5	37.5	124.7	0.857398	NA	48	NA	161	2.6	4.8	194	7.1	0	NA	NA	2	1	3	2	0	600	NA	0	0	0	1	1	1	0	0	0	0	NA	NA	NA	NA	NA	NA	NA	NA	NA	NA
85948	2	38	4	4	3	1	166.293	103.7	37.5	120.6	0.83475	78	64	120	200	2.2	5.3	374	7.5	1	NA	NA	1	1	1	2	1	300	NA	1	1	3	3	1	0	3	0	0	1	NA	0	0	NA	2.39	8.08	NA	0.978	1.36	NA
121240	2	44	4	5	2	2	161.576	97.9	37.5	116.1	0.815249	49	50	104	164	2	3.5	326	7.4	1	NA	NA	2	1	5	2	0	300	NA	0	0	0	0	1	0	1	0	0	0	NA	0	0	NA	6.97	10.27	NA	1.642	3.475	NA
112139	2	33	1	4	1	1	155.349	90.5	37.5	111.4	0.797768	117	36	136	195	2.5	5.2	323	6.9	1	NA	NA	2	1	1	2	0	780	NA	0	0	1	1	2	0	0	0	0	0	NA	0	0	NA	5.17	4.7	NA	1.644	3.598	NA
117429	2	41	4	3	2	1	153.449	88.3	37.5	110.6	0.796927	NA	45	NA	164	2.7	2.7	354	7.3	1	NA	NA	2	1	4	2	0	960	NA	0	0	0	1	1	0	0	0	0	0	NA	0	0	NA	1.93	27.82	NA	1.522	3.504	NA
79517	2	20	5	3	3	1	157.903	93.5	37.5	99.6	0.707473	NA	53	NA	158	2.5	7.2	317	7.2	1	NA	NA	2	1	1	2	0	480	NA	2	1	0	1	1	0	0	0	0	0	NA	0	NA	NA	3.19	NA	NA	1.633	NA	NA
86461	2	31	2	4	1	1	161.709	97.8	37.4	125	0.878946	NA	40	NA	205	3	5.3	308	7.1	1	NA	NA	2	1	2	2	0	420	NA	3	0	0	0	0	0	0	0	0	0	NA	0	0	NA	4.37	2.78	NA	1.763	1.549	NA
82735	2	23	1	2	1	1	159.125	94.7	37.4	121.4	0.860534	NA	41	NA	183	3.4	5.6	414	7.4	3	NA	NA	3	1	1	2	1	240	NA	0	1	0	1	0	0	0	0	0	0	NA	0	0	NA	4.85	2.46	NA	1.012	0.622	NA
86810	2	36	5	4	1	1	159.796	95.5	37.4	121.2	0.857311	33	34	122	163	2.1	3.7	246	7.4	1	NA	NA	2	1	6	2	0	120	NA	0	0	0	0	0	0	0	0	0	NA	NA	0	0	NA	0.62	2.52	NA	0.442	2.474	NA
86352	2	31	4	5	3	1	164.089	100.7	37.4	120.2	0.839042	NA	51	NA	162	2	2.3	245	7.4	1	NA	NA	2	1	2	2	0	360	NA	0	0	0	1	1	0	0	0	0	0	NA	0	0	NA	4.49	8.18	NA	1.402	2.25	NA
81919	2	45	3	4	3	1	169.932	108	37.4	119.8	0.821746	NA	34	NA	104	2.8	6.5	283	7.4	1	NA	NA	2	1	6	2	0	480	NA	0	0	1	1	1	0	1	0	0	0	NA	0	0	NA	12.15	5.96	NA	3.338	1.698	NA
120635	2	34	4	3	3	1	173.668	112.8	37.4	120	0.814218	51	58	80	148	1.7	3.6	213	7.2	1	NA	NA	2	1	7	2	0	360	NA	0	1	0	1	1	0	0	0	0	0	NA	14	NA	NA	5.02	NA	NA	1.368	NA	NA
110247	2	31	2	4	1	1	152.519	87	37.4	111.8	0.809466	NA	42	NA	181	2	5.5	258	7	1	NA	NA	2	1	4	1	1	600	NA	0	0	1	1	1	0	0	0	0	0	NA	0	0	NA	2.69	1.22	NA	1.166	1.06	NA
75289	2	42	3	2	1	1	160.214	96	37.4	113.8	0.803917	137	39	98	164	2.2	5.5	220	6.5	0	NA	NA	2	1	6	1	1	480	NA	3	3	3	3	0	1	0	3	0	1	NA	0	0	NA	0.49	2.72	NA	0.421	1.273	NA
114645	2	45	1	2	2	1	156.328	91.4	37.4	111	0.793822	154	44	131	206	1.7	4.1	306	6.4	1	NA	NA	1	1	3	2	0	348	NA	1	3	3	3	1	0	3	0	0	0	NA	0	0	NA	3.38	16.98	NA	0.614	4.677	NA
111370	2	34	5	4	1	1	163.599	100.1	37.4	111.7	0.780875	82	42	151	209	2	3.2	338	7.2	1	NA	NA	2	1	1	2	1	720	NA	1	1	2	2	1	2	1	1	0	0	NA	0	0	NA	1.55	3.32	NA	0.661	0.772	NA
119689	2	36	2	4	1	1	156.414	91.5	37.4	95.5	0.682787	NA	51	NA	204	3.1	8.9	357	7.1	1	NA	NA	2	1	3	2	0	30	NA	0	0	2	2	0	0	0	0	0	0	NA	0	0	NA	1.9	1.16	NA	0.649	1.68	NA
88744	2	27	1	2	1	3	153.686	88.1	37.3	124	0.895981	NA	32	NA	171	2.5	5.3	258	6.7	0	NA	NA	2	1	2	2	1	180	NA	0	0	0	0	1	0	0	0	0	0	NA	0	0	NA	2.41	0.63	NA	3.707	0.252	NA
77846	2	34	3	2	1	1	148.36	82.1	37.3	115	0.845733	NA	45	NA	171	2.6	5.2	263	7	3	NA	NA	2	1	2	2	0	348	NA	0	1	0	1	0	0	0	0	0	0	NA	0	0	NA	2.81	2.28	NA	1.051	0.58	NA
80881	2	30	5	3	1	3	165.366	102	37.3	117.4	0.817785	98	36	65	121	2.8	7.8	363	6.7	0	NA	NA	2	1	2	2	0	660	NA	0	0	0	0	0	0	0	0	0	NA	NA	0	0	NA	7.24	6.21	NA	1.423	2.005	NA
117505	2	36	5	4	1	1	162.998	99.1	37.3	115.3	0.80897	NA	43	NA	208	2.2	3.2	324	7.6	1	NA	NA	2	1	5	2	0	300	NA	0	0	1	1	1	0	0	0	0	0	NA	0	0	NA	5.26	0.86	NA	2.492	0.954	NA
117931	2	44	5	4	1	1	150.513	84.5	37.3	106.7	0.779061	NA	45	NA	171	2.4	5.7	272	7.1	1	NA	NA	2	1	2	2	0	120	NA	0	0	0	3	2	0	0	0	0	0	NA	0	0	NA	1.03	0.61	NA	0.484	0.554	NA
79068	2	36	5	5	1	2	154.729	89.3	37.3	106.5	0.766934	NA	57	NA	193	2.7	5.4	254	7	3	NA	NA	2	1	2	1	1	480	NA	0	0	0	0	0	0	0	0	0	NA	NA	0	0	NA	0.52	1.24	NA	2.713	1.199	NA
90533	2	34	4	5	1	1	157.562	92.6	37.3	106.9	0.762863	31	45	81	132	1.8	2.1	313	7.2	3	NA	NA	2	1	3	2	1	480	NA	0	0	1	1	0	0	0	0	0	0	NA	0	0	NA	12.12	1.47	NA	1.359	1.044	NA
115270	2	41	1	1	1	1	148.45	82.2	37.3	102.1	0.750636	NA	54	NA	161	2.2	7.1	238	6.6	3	NA	NA	2	1	3	2	0	60	NA	0	0	0	0	0	0	0	0	0	NA	NA	0	0	NA	8.74	5.63	NA	2.455	2.138	NA
76674	2	42	3	1	1	1	162.887	98.7	37.2	125.2	0.880303	NA	45	NA	232	4	14.4	304	7.7	1	NA	NA	1	1	4	1	0	360	NA	3	3	3	3	3	3	3	3	1	3	NA	0	0	NA	4.93	5.44	NA	1.291	1.556	NA
111720	2	35	3	4	1	1	157.859	92.7	37.2	122.5	0.87493	NA	44	NA	213	2.3	3	189	7.1	1	NA	NA	2	1	5	2	0	60	NA	0	0	0	1	1	0	0	0	0	0	NA	0	0	NA	2.32	2.54	NA	1.938	1.498	NA
84859	2	42	4	5	3	1	163.628	99.6	37.2	124.7	0.8748	32	45	83	134	1.2	1.6	185	7.2	3	NA	NA	2	1	4	2	0	480	NA	0	0	0	1	0	0	0	0	0	0	NA	0	0	NA	2	3.9	NA	0.376	1.353	NA
114991	2	37	3	1	1	3	163.217	99.1	37.2	121.7	0.854829	NA	35	NA	249	3.4	6.3	237	6.9	1	NA	NA	2	1	3	2	0	120	NA	0	0	0	0	0	0	0	0	0	NA	NA	NA	NA	NA	NA	NA	NA	NA	NA	NA
79950	2	37	2	3	1	1	154.241	88.5	37.2	118.2	0.854061	NA	52	NA	209	3.5	7	307	7.6	3	NA	NA	2	1	1	2	0	300	NA	0	0	0	1	0	0	0	0	0	0	NA	0	0	NA	2.97	10.59	NA	1.71	2.827	NA
122555	2	33	4	4	1	1	168.804	106	37.2	123.2	0.850925	NA	60	NA	179	3.1	4.7	291	7.3	1	NA	NA	2	1	3	2	0	240	NA	0	0	0	0	0	0	0	0	0	NA	NA	0	0	NA	5.18	3.08	NA	4.374	1.441	NA
112438	2	33	3	4	2	1	152.312	86.3	37.2	115	0.836185	114	64	118	205	3.5	6.4	256	7	1	NA	NA	2	1	4	2	1	480	NA	0	1	0	0	0	1	0	0	0	0	NA	0	0	NA	7.52	1.5	NA	2.754	0.324	NA
116706	2	42	1	5	1	2	159.046	94.1	37.2	115.7	0.823271	NA	42	NA	188	2.9	4	305	7	1	NA	NA	2	1	3	2	1	600	NA	0	0	0	1	0	0	0	0	0	0	NA	0	0	NA	4.85	4.53	NA	2.289	1.88	NA
74998	2	38	5	4	1	1	152.224	86.2	37.2	111.2	0.808789	74	41	127	183	3	3.7	255	7.6	3	NA	NA	2	1	5	2	0	360	NA	0	0	0	1	0	0	1	0	0	0	NA	0	0	NA	4.31	4.25	NA	2.126	2.175	NA
76755	2	42	3	3	1	1	169.598	107	37.2	115.7	0.79725	NA	48	NA	123	1.9	4.6	262	7	1	NA	NA	2	1	2	3	0	600	NA	0	1	0	1	0	1	0	0	0	0	NA	0	0	NA	1.68	0.66	NA	1.879	1.52	NA
84768	2	33	1	3	3	1	146.096	79.4	37.2	103.4	0.767666	NA	54	NA	175	3.9	4.9	293	7.5	1	NA	NA	2	1	3	1	0	480	NA	0	0	0	1	1	0	0	0	0	0	NA	0	NA	NA	2.44	NA	NA	1.162	NA	NA
78969	2	20	4	2	3	1	153.892	88.1	37.2	105.7	0.764607	NA	39	NA	194	2.9	3.7	182	7.4	3	NA	NA	2	1	1	1	0	600	NA	0	0	2	2	0	0	0	0	0	0	NA	0	0	NA	2.94	1.08	NA	1.222	2.65	NA
89511	2	45	3	4	1	1	166.317	102.9	37.2	108.2	0.752888	93	54	123	196	2.9	4.3	283	7	1	NA	NA	2	1	2	2	1	480	NA	1	2	2	3	1	0	2	2	0	3	NA	0	0	NA	2.3	2.69	NA	1.5	0.81	NA
111153	2	32	4	5	1	2	160.141	95.4	37.2	98	0.694938	NA	NA	NA	NA	NA	NA	NA	NA	1	NA	NA	2	1	1	2	0	360	NA	0	1	0	1	1	0	1	0	0	1	NA	38.2	NA	NA	2.66	NA	NA	0.908	NA	NA
88336	2	28	3	4	1	1	162.029	97.4	37.1	120.3	0.849611	NA	37	NA	164	3.5	9.9	297	7.5	1	NA	NA	2	1	1	2	0	600	NA	0	0	0	0	0	0	0	0	0	NA	NA	0	0	NA	3.32	5.84	NA	1.405	2.279	NA
123513	2	28	3	2	3	1	160.693	95.8	37.1	118.5	0.840371	132	44	138	208	3.7	3.3	170	7.1	0	NA	NA	2	1	4	1	0	420	NA	0	0	0	1	1	0	1	1	0	0	NA	14.4	NA	NA	2.18	NA	NA	1.063	NA	NA
117026	2	32	2	1	3	1	161.529	96.8	37.1	114.5	0.809899	NA	45	NA	231	3.4	4.6	263	7.5	1	NA	NA	2	1	1	2	1	120	NA	0	0	0	0	0	0	0	0	0	NA	NA	0	0	NA	1.84	1.77	NA	1.323	1.166	NA
82971	2	34	3	4	1	1	164.341	100.2	37.1	115	0.806446	NA	53	NA	226	1.8	7.6	246	7.2	1	NA	NA	2	1	4	1	0	120	NA	0	0	0	1	0	0	0	0	0	0	NA	0	0	NA	1.53	0.36	NA	0.647	1.063	NA
86882	2	41	1	1	1	1	162.278	97.7	37.1	112.2	0.791796	NA	41	NA	168	2.9	4.7	213	7.3	1	NA	NA	1	1	5	1	1	30	NA	0	0	0	0	0	0	0	0	0	NA	NA	14	NA	NA	2.34	NA	NA	1.368	NA	NA
81264	2	21	3	3	3	1	156.098	90.4	37.1	108.9	0.783574	NA	43	NA	145	2.8	3.6	277	6.9	1	NA	NA	2	1	1	2	0	660	NA	1	1	2	3	2	2	1	1	0	1	NA	0	0	NA	5.95	2.87	NA	1.762	1.547	NA
123096	2	39	4	5	1	2	155.406	89.6	37.1	108.6	0.783154	NA	66	NA	159	1.8	2.7	421	7.3	1	NA	NA	2	1	1	2	0	900	NA	0	0	0	0	0	0	0	0	0	NA	NA	NA	NA	NA	NA	NA	NA	NA	NA	NA
81231	2	44	4	4	3	1	172.503	110.4	37.1	111	0.759757	NA	42	NA	197	2.7	2.3	172	7.7	1	NA	NA	2	1	1	1	1	720	NA	0	2	2	1	0	3	1	0	2	0	NA	103.9	112.6	NA	67.99	2.25	NA	4.651	1.59	NA
78720	2	27	4	4	3	1	166.703	103.1	37.1	108.4	0.75476	56	83	76	170	1.1	3	231	6.8	1	NA	NA	2	1	5	2	0	480	NA	0	2	2	2	2	0	1	0	0	1	NA	25.9	0	NA	2.72	2.81	NA	0.88	3.703	NA
117040	2	35	3	4	1	1	168.712	105.6	37.1	108.4	0.750253	137	40	101	168	2.7	3.4	212	7.1	3	NA	NA	2	1	2	2	1	60	NA	0	0	1	1	0	0	0	0	0	0	NA	0	0	NA	1.61	1.7	NA	1.18	1.736	NA
91215	2	43	1	2	1	1	159.345	94.2	37.1	103.6	0.737804	116	51	127	201	2.2	5.3	358	7.8	3	NA	NA	2	1	4	2	0	240	NA	1	0	1	1	1	0	1	1	0	0	NA	0	0	NA	3.84	5.74	NA	4.877	1.895	NA
109665	2	42	3	2	1	1	167.735	104.1	37	118.6	0.824716	NA	36	NA	200	2.4	4.1	214	6.7	1	NA	NA	2	1	4	2	0	180	NA	0	0	1	0	0	0	0	0	0	0	NA	56.1	NA	NA	2.49	NA	NA	1.615	NA	NA
121364	2	27	4	3	1	1	171.243	108.5	37	119.4	0.821731	NA	48	NA	137	2.4	2.6	339	7.7	1	NA	NA	2	1	5	1	0	360	NA	0	0	1	0	1	0	0	0	0	0	NA	36.1	0	NA	1.16	2.34	NA	0.685	1.11	NA
113092	2	44	2	2	1	1	157.772	92.1	37	104.6	0.749979	NA	56	NA	152	2.2	4.1	356	7.5	3	NA	NA	2	1	3	2	0	120	NA	1	0	0	0	0	0	0	0	0	0	NA	0	0	NA	1.42	2.59	NA	1.278	1.106	NA
74097	2	40	3	4	1	1	172.109	109.6	37	104.6	0.718062	46	60	112	181	1.6	2.8	188	6.6	1	NA	NA	2	1	4	2	0	480	NA	0	0	2	0	0	0	0	0	0	1	NA	0	0	NA	1.74	3.68	NA	1.33	0.904	NA
115754	2	43	4	4	1	2	167.332	103.6	37	97.5	0.678809	NA	55	NA	217	2.2	2.8	339	7.2	1	NA	NA	2	1	4	2	0	900	NA	0	0	1	1	0	0	1	0	0	0	NA	0	0	NA	1.15	0.99	NA	1.633	0.61	NA
110314	2	37	4	4	3	3	177.761	116.6	36.9	126.3	0.854675	NA	74	NA	164	3.2	4.6	229	8.2	1	NA	NA	2	1	8	2	0	720	NA	3	3	3	3	3	3	3	0	0	3	NA	0	6.5	NA	1.47	11.42	NA	0.585	5.616	NA
122019	2	43	3	3	1	1	157.556	91.6	36.9	118.8	0.853916	111	46	154	222	2.2	6.9	236	7.3	1	NA	NA	2	1	2	3	0	240	NA	1	0	1	1	1	0	0	0	0	0	NA	0	0	NA	0.92	1.9	NA	0.53	0.74	NA
80231	2	36	4	4	3	1	161.547	96.3	36.9	113.7	0.807098	46	57	97	163	1.5	2.8	300	7.1	1	NA	NA	2	1	2	2	0	300	NA	0	0	0	0	0	0	0	0	0	NA	NA	0	0	NA	4.08	1.14	NA	1.313	1.322	NA
77643	2	24	1	2	1	1	149.977	83	36.9	109.5	0.806709	NA	39	NA	163	2.5	6.4	202	7.1	0	NA	NA	2	1	2	2	0	180	NA	3	0	1	1	0	1	1	1	0	0	NA	0	0	NA	4.17	0.48	NA	0.855	1.472	NA
86590	2	42	5	5	1	1	172.106	109.3	36.9	115.2	0.792264	334	37	102	206	2.5	5	272	6.9	0	NA	NA	2	1	2	2	0	600	NA	0	0	0	1	0	0	0	0	0	0	NA	0	0	NA	5.03	1.95	NA	1.712	1.169	NA
114422	2	38	1	4	3	1	173.908	111.6	36.9	108.1	0.739575	171	40	147	221	2	4	279	7.5	1	NA	NA	2	1	1	2	0	360	NA	0	0	1	1	0	0	0	0	0	0	NA	0	0	NA	5.02	2.19	NA	1.419	1.128	NA
113844	2	41	2	4	1	1	153.813	87.3	36.9	100.2	0.728931	135	42	117	186	2.6	4.9	278	7.2	1	NA	NA	2	1	5	1	0	120	NA	0	0	0	0	0	0	0	0	0	NA	NA	0	0	NA	6.26	2.48	NA	0.883	1.741	NA
117975	2	22	3	3	3	3	168.029	103.9	36.8	125.8	0.877183	217	54	114	211	2.6	10.7	255	6.9	1	NA	NA	2	1	2	2	0	180	NA	0	0	0	0	0	0	0	0	0	NA	NA	0	0	NA	3.86	10.09	NA	1.819	2.665	NA
123478	2	38	3	5	1	1	162.772	97.5	36.8	116.6	0.826059	NA	69	NA	210	2	3.9	251	6.5	1	NA	NA	2	1	3	2	0	120	NA	1	0	0	3	1	0	0	0	0	1	NA	0	NA	NA	0.97	NA	NA	1.224	NA	NA
111107	2	31	4	4	3	3	153.492	86.7	36.8	112.3	0.819291	46	64	117	190	2.6	4.2	325	7.2	1	NA	NA	2	1	4	2	1	480	NA	1	1	1	1	1	1	1	1	2	0	NA	0	0	NA	3.7	0.95	NA	1.043	1.261	NA
113366	2	26	1	3	1	1	161.178	95.6	36.8	114.7	0.816606	193	35	108	182	2.2	5.6	306	6.9	1	NA	NA	2	1	8	2	0	300	NA	1	0	0	1	1	1	0	0	0	0	NA	0	0	NA	1.75	2.95	NA	0.683	1.409	NA
122826	2	21	1	3	1	1	159.312	93.4	36.8	108.6	0.77769	296	50	145	254	2.5	6	204	6.6	1	NA	NA	2	1	2	2	0	120	NA	1	0	1	1	1	0	0	0	0	0	NA	0	0	NA	17.05	6.52	NA	5.216	1.402	NA
123052	2	20	4	3	3	1	168.594	104.6	36.8	107.8	0.750411	102	43	74	137	2.6	6.5	224	7.6	1	NA	NA	2	1	1	2	0	420	NA	2	0	1	2	3	0	0	0	0	0	NA	119.7	0	NA	14.09	8.43	NA	3.734	1.701	NA
84766	2	40	4	4	1	2	165.729	100.8	36.7	122	0.858125	NA	29	NA	129	2	4.9	298	6.3	1	NA	NA	2	1	3	2	1	600	NA	1	0	1	1	0	0	0	0	0	0	NA	0	17.7	NA	0.39	3	NA	1.851	1.525	NA
118340	2	34	4	4	3	1	166.221	101.4	36.7	120	0.842806	70	50	71	135	3.8	3.4	255	7.8	1	NA	NA	2	1	5	2	0	180	NA	0	1	0	0	0	0	0	0	0	0	NA	0	0	NA	4.17	2.06	NA	2.254	1.461	NA
87162	2	35	1	4	1	1	155.288	88.5	36.7	113.2	0.822558	156	48	119	198	2.1	3.3	373	7.1	1	NA	NA	2	1	3	2	0	480	NA	0	0	0	3	3	0	1	0	0	1	NA	0	0	NA	4.2	2.48	NA	1.329	1.326	NA
123446	2	37	1	4	1	1	158.157	91.8	36.7	113.9	0.820104	61	52	98	162	2.7	4.2	297	7.1	1	NA	NA	2	1	4	2	0	480	NA	0	0	0	0	0	0	0	0	0	NA	NA	0	0	NA	3.69	0.52	NA	0.772	1.329	NA
92768	2	34	2	1	3	1	161.313	95.5	36.7	110.1	0.784951	NA	32	NA	157	1.6	4.1	302	7.1	3	NA	NA	2	1	4	2	0	120	NA	1	1	0	0	0	0	1	0	0	0	NA	0	0	NA	3.51	2.61	NA	2.017	0.774	NA
85702	2	40	1	3	2	1	150.838	83.5	36.7	93.7	0.690834	78	43	98	157	2.1	3.8	291	7.6	0	NA	NA	2	1	7	2	0	240	NA	0	0	0	2	2	2	0	0	0	0	NA	0	0	NA	5.82	6.36	NA	2.84	1.365	NA
112284	2	30	3	4	1	1	157.854	91.2	36.6	119.2	0.860651	NA	34	NA	195	2	4.2	246	6.7	1	NA	NA	2	1	3	2	1	660	NA	2	3	1	2	3	3	2	0	0	0	NA	0	0	NA	4.58	0.59	NA	2.44	1.094	NA
84485	2	24	4	3	1	1	165.955	100.8	36.6	119.1	0.83868	58	45	140	197	2.7	6.2	278	7.7	3	NA	NA	2	1	4	2	0	600	NA	1	2	3	3	3	2	0	0	0	0	NA	0	0	NA	1.37	2.06	NA	0.183	0.553	NA
82805	2	34	3	5	1	2	165.79	100.6	36.6	110.2	0.776393	62	46	87	145	2.1	4.7	263	6.7	1	NA	NA	3	1	2	2	0	300	NA	0	0	1	1	0	0	0	0	0	0	NA	0	0	NA	2.07	6.61	NA	2.302	2.436	NA
89223	2	43	3	4	1	1	166.037	100.9	36.6	108.3	0.762439	NA	59	NA	162	2.2	6.8	269	7.2	1	NA	NA	1	1	4	1	0	420	NA	0	0	1	1	0	0	0	0	0	0	NA	72	0	NA	17.04	5.87	NA	15.646	2.279	NA
118932	2	39	4	4	1	1	161.585	95.3	36.5	122.2	0.87366	NA	54	NA	201	2.9	3.8	209	6.3	3	NA	NA	1	1	2	1	0	180	NA	0	0	2	2	0	0	0	0	0	0	NA	0	0	NA	1.08	1.09	NA	0.758	0.863	NA
92521	2	29	4	4	3	1	164.525	98.8	36.5	118.5	0.839603	76	39	110	164	2.6	4	236	7.7	1	NA	NA	2	1	1	2	1	600	NA	1	0	0	0	3	0	0	0	0	0	NA	17	NA	NA	12.74	NA	NA	4.544	NA	NA
123009	2	43	3	5	1	2	170.012	105.5	36.5	117.8	0.821064	91	41	99	158	2.3	3.5	402	7	1	NA	NA	1	1	1	1	1	600	NA	0	0	0	1	0	0	0	0	0	0	NA	0	NA	NA	2.1	NA	NA	0.537	NA	NA
90925	2	23	2	3	1	3	158.417	91.6	36.5	111	0.801482	NA	41	NA	243	3.2	5.1	330	7.3	1	NA	NA	2	1	2	2	0	480	NA	1	1	0	1	0	1	0	0	0	0	NA	0	0	NA	2.1	1.56	NA	1.272	2.162	NA
116099	2	41	1	3	1	1	152.603	85	36.5	108.4	0.797479	NA	41	NA	145	3.1	8.3	336	7.3	1	NA	NA	2	1	3	2	0	120	NA	0	0	1	0	0	0	0	0	0	0	NA	37	NA	NA	4.76	NA	NA	1.887	NA	NA
86520	2	39	3	5	1	2	168.799	104	36.5	113.2	0.791831	60	42	70	124	2.1	5.6	276	7.6	0	NA	NA	2	1	3	2	1	720	NA	0	0	0	0	0	0	0	0	0	NA	NA	0	0	NA	13.84	1.84	NA	4.666	0.911	NA
81828	2	45	1	3	1	1	161.415	95.1	36.5	108.5	0.776121	NA	42	NA	190	2.1	3.5	337	7.4	1	NA	NA	1	1	5	2	0	480	NA	0	0	0	0	0	0	0	0	0	NA	NA	0	0	NA	9.7	1.04	NA	3.126	0.641	NA
75125	2	32	3	4	2	1	171.935	107.9	36.5	111.5	0.772795	NA	27	NA	209	2.7	9.1	241	7.4	1	NA	NA	2	1	2	2	0	720	NA	2	2	1	3	3	1	1	0	1	1	NA	0	0	NA	13.39	1.99	NA	3.042	2.245	NA
114294	2	28	3	3	1	1	161.245	94.9	36.5	106.5	0.762215	57	42	105	158	2.6	4	263	6.3	1	NA	NA	2	1	2	1	0	60	NA	0	0	0	1	0	0	0	0	0	0	NA	0	0	NA	3.95	3.46	NA	1.788	2.291	NA
124507	2	45	4	4	3	1	164.941	99.3	36.5	103	0.728861	46	41	110	160	3.2	3	277	7.4	1	NA	NA	2	1	3	1	0	360	NA	0	0	1	1	1	0	1	0	0	0	NA	0	0	NA	3.15	0.63	NA	2.365	1.35	NA
79019	2	45	4	5	1	1	165.167	99.3	36.4	115.4	0.817541	91	54	126	198	2.4	3.1	293	7	1	NA	NA	2	1	5	2	1	30	NA	0	0	0	0	0	0	0	0	0	NA	NA	0	0	NA	4.44	3.34	NA	1.642	1.199	NA
121335	2	26	3	4	2	2	165.561	99.5	36.3	118.4	0.839334	NA	55	NA	272	2.2	5.4	213	7.5	1	NA	NA	2	1	1	2	0	720	NA	0	0	0	1	1	0	0	0	0	0	NA	0	61.4	NA	4.99	12.46	NA	1.818	4.96	NA
77872	2	42	1	1	1	1	146.587	78	36.3	111.2	0.837761	NA	67	NA	179	2.2	5.2	306	7.9	3	NA	NA	2	1	3	2	0	480	NA	0	0	0	0	0	0	0	0	0	NA	NA	0	0	NA	0.37	3.18	NA	0.676	1.721	NA
90926	2	28	5	5	1	2	150.938	82.7	36.3	109.9	0.815944	NA	56	NA	197	2.7	11.7	306	6.3	3	NA	NA	2	1	1	1	1	300	NA	0	0	1	1	0	0	0	0	0	0	NA	0	0	NA	1.97	1	NA	1.198	1.745	NA
111850	2	42	3	4	2	1	162.962	96.4	36.3	110.6	0.790269	66	40	102	155	2.4	5.5	431	7	1	NA	NA	2	1	2	2	0	300	NA	0	0	1	1	0	0	0	0	0	0	NA	54.5	0	NA	4.35	1.37	NA	0.898	0.862	NA
89642	2	37	3	4	1	2	168.611	103.2	36.3	112.5	0.790263	68	69	91	174	2	4	191	6.5	1	NA	NA	2	1	1	2	1	480	NA	0	0	0	1	0	0	0	0	0	0	NA	0	NA	NA	2.83	NA	NA	0.889	NA	NA
88700	2	21	1	3	3	1	159.286	92.1	36.3	109.1	0.788495	NA	34	NA	197	2.6	5	309	8	1	NA	NA	2	1	1	2	0	240	NA	0	0	0	0	0	0	0	0	0	NA	NA	0	NA	NA	4.34	NA	NA	1.061	NA	NA
79581	2	31	1	4	1	1	153.113	85.1	36.3	101.5	0.748208	53	47	78	136	1.8	5	160	6.7	1	NA	NA	2	1	2	2	0	480	NA	0	0	0	1	1	0	0	0	0	0	NA	0	0	NA	12.73	5.54	NA	2.398	1.933	NA
122282	2	25	1	5	3	1	156.582	89	36.3	102.6	0.747892	NA	59	NA	162	2.9	4.9	274	7.4	1	NA	NA	2	1	1	2	0	660	NA	0	0	0	0	0	0	0	0	0	NA	NA	0	0	NA	2.18	4	NA	1.904	1.099	NA
111675	2	35	4	4	1	1	174.867	111	36.3	106.8	0.736681	53	63	111	185	2.1	3.3	395	7.3	0	NA	NA	2	1	5	2	0	180	NA	0	0	2	2	1	0	0	0	0	0	NA	0	0	NA	0.88	0.53	NA	0.742	0.867	NA
89314	2	39	4	4	1	1	169.579	104.1	36.2	128.8	0.903839	164	45	159	237	2.2	2.7	207	NA	1	NA	NA	1	1	2	1	0	300	NA	1	0	0	2	0	0	1	0	0	0	NA	0	0	NA	1.39	6.11	NA	0.728	1.136	NA
76272	2	42	3	4	1	1	160.11	92.8	36.2	119.2	0.86085	86	38	82	137	2.1	7.8	284	6.7	3	NA	NA	2	1	2	1	0	480	NA	0	0	0	0	0	0	0	0	0	NA	NA	0	0	NA	2.07	3.23	NA	1.276	1.132	NA
110224	2	34	1	3	1	1	159.332	91.9	36.2	115.3	0.834716	NA	39	NA	184	3	4.2	336	7	1	NA	NA	2	1	3	2	0	300	NA	0	0	0	0	0	0	0	0	0	NA	NA	0	0	NA	9.11	3.34	NA	1.89	0.661	NA
114512	2	30	4	3	1	1	158.114	90.5	36.2	114.3	0.830658	75	42	94	151	2.2	2	316	6.8	1	NA	NA	1	1	3	1	0	60	NA	1	1	1	1	1	1	1	0	0	1	NA	0	NA	NA	4.11	NA	NA	1.824	NA	NA
118185	2	32	4	4	3	1	174.793	110.6	36.2	118.4	0.818372	NA	49	NA	162	3.2	2.5	290	8.2	1	NA	NA	2	1	2	1	0	600	NA	0	1	1	1	2	2	1	0	0	0	NA	0	NA	NA	1.55	NA	NA	0.678	NA	NA
93277	2	40	1	2	1	1	149.954	81.4	36.2	103.6	0.773111	102	57	126	203	2.4	3.2	272	6.9	1	NA	NA	2	1	3	2	0	300	NA	2	1	2	1	1	0	0	0	0	1	NA	0	0	NA	8.66	8.19	NA	2.696	3.163	NA
81956	2	35	2	4	1	1	158.288	90.7	36.2	104.3	0.757566	NA	54	NA	169	1.7	4	241	7	1	NA	NA	2	1	5	2	0	300	NA	0	0	1	1	1	1	0	0	0	0	NA	39.6	0	NA	3.91	0	NA	1.778	3.443	NA
88699	2	42	1	1	1	1	163.946	97.3	36.2	104.7	0.747234	NA	54	NA	136	2.5	6.1	308	6.8	3	NA	NA	2	1	4	2	0	40	NA	0	0	0	0	0	0	0	0	0	NA	NA	0	NA	NA	2.78	NA	NA	0.913	NA	NA
123260	2	39	1	4	3	1	166.289	100.1	36.2	102.5	0.726363	78	40	53	109	2.8	4.2	234	6.7	1	NA	NA	2	1	3	2	0	240	NA	1	1	1	2	1	1	1	1	0	1	NA	0	0	NA	1.45	1.44	NA	1.244	4.318	NA
116160	2	38	1	1	1	1	163.073	96	36.1	119.2	0.854569	NA	38	NA	229	3.7	7.4	231	7.3	1	NA	NA	2	1	2	2	0	300	NA	1	0	1	1	0	0	0	0	0	0	NA	0	0	NA	7.15	1.71	NA	3.503	1.635	NA
76042	2	27	3	5	1	1	177.08	113.2	36.1	119	0.818699	NA	47	NA	130	1.8	5.7	236	7.5	3	NA	NA	2	1	2	2	0	360	NA	0	0	0	1	0	1	0	0	0	0	NA	0	0	NA	5.44	2.2	NA	0.875	0.755	NA
80169	2	42	2	1	1	1	164.258	97.4	36.1	113.3	0.809336	4233	41	NA	612	NA	NA	NA	NA	3	NA	NA	1	1	3	1	0	180	NA	0	2	3	2	0	0	0	0	0	0	NA	0	0	NA	1.7	6.43	NA	1.25	1.561	NA
76290	2	42	5	3	1	1	164.763	98	36.1	113.2	0.807381	NA	32	NA	245	3.7	5.4	220	7.8	3	NA	NA	3	1	2	2	0	480	NA	0	0	0	0	0	0	0	0	0	NA	NA	0	0	NA	7.57	0.47	NA	1.92	1.722	NA
117677	2	38	4	5	1	2	157.103	89.1	36.1	108.5	0.792499	NA	62	NA	186	1.6	3	334	7.4	1	NA	NA	2	1	3	2	0	360	NA	0	0	0	1	0	0	1	0	0	0	NA	15.9	15.9	NA	0.3	0.57	NA	0.307	0.358	NA
74119	2	32	1	1	1	1	164.258	97.4	36.1	107	0.764333	214	59	110	212	2.2	4.4	208	6.9	1	NA	NA	2	1	3	2	0	300	NA	0	1	1	0	0	1	0	0	0	0	NA	0	12.3	NA	1.64	4.85	NA	1.477	1.81	NA
76882	2	33	3	4	3	1	173.045	108.1	36.1	105.6	0.73493	69	48	116	178	3.2	4.1	228	6.7	0	NA	NA	2	1	1	2	1	480	NA	3	3	1	3	3	2	3	2	0	3	NA	0	0	NA	3.52	2.6	NA	0.97	0.569	NA
75469	2	39	3	4	3	1	171.917	106.4	36	120.5	0.842931	NA	NA	NA	NA	NA	NA	NA	NA	1	NA	NA	2	1	2	2	0	720	NA	0	0	3	3	0	0	0	0	0	0	NA	0	0	NA	2.31	13.06	NA	0.563	6.275	NA
78410	2	45	2	2	1	3	151.015	82.1	36	112.1	0.836682	326	34	82	181	2.1	5.3	220	6.9	0	NA	NA	2	1	2	2	0	480	NA	0	0	1	1	0	0	0	0	0	0	NA	0	0	NA	2.68	6.43	NA	1.285	3.19	NA
86795	2	35	5	4	1	1	151.474	82.6	36	106.4	0.792934	98	42	157	219	1.7	3.9	273	7.6	0	NA	NA	2	1	2	2	1	300	NA	0	0	0	1	1	0	0	0	0	0	NA	0	0	NA	1.7	12.18	NA	1.047	8.217	NA
77251	2	26	4	4	1	1	168.984	102.8	36	109.4	0.771898	NA	28	NA	203	3.7	6.2	259	7.3	1	NA	NA	3	1	1	2	1	480	NA	1	2	3	3	3	2	3	2	0	1	NA	0	0	NA	2.56	0.3	NA	1.636	1.651	NA
113381	2	31	4	4	1	3	150.923	82	36	95.4	0.712255	NA	53	NA	186	3.7	8.6	374	7.5	1	NA	NA	2	1	3	2	0	300	NA	0	0	1	1	0	0	0	0	0	0	NA	0	NA	NA	1.63	NA	NA	1.227	NA	NA
119218	2	29	3	4	1	1	170.531	104.4	35.9	125.8	0.885216	NA	50	NA	186	4.2	9.1	545	6.8	1	NA	NA	2	1	1	1	1	780	NA	0	0	1	0	0	0	0	0	0	0	NA	0	0	NA	6.52	6.41	NA	2.108	3.109	NA
91711	2	34	5	5	1	1	148.999	79.7	35.9	109.2	0.822057	NA	38	NA	163	2.6	8.4	239	7.2	1	NA	NA	2	1	3	2	0	120	NA	0	0	0	0	0	0	0	0	0	NA	NA	8.4	0	NA	6.07	6.44	NA	1.214	2.202	NA
112902	2	35	3	4	1	1	171.508	105.6	35.9	117	0.820945	89	63	103	184	2.9	5.6	327	7	1	NA	NA	2	1	1	2	1	600	NA	0	0	1	2	0	0	0	0	0	0	NA	0	0	NA	1.97	6.58	NA	1.22	1.2	NA
74843	2	38	1	1	1	1	150.301	81.1	35.9	109.4	0.819985	45	89	109	207	1.3	3.7	130	6.9	1	NA	NA	2	1	6	2	0	15	NA	1	2	1	2	2	2	0	0	0	0	NA	0	0	NA	1.52	6.61	NA	1.877	1.744	NA
88677	2	31	1	4	1	2	148.343	79	35.9	108.2	0.816328	NA	71	NA	220	2.7	9.2	319	6.5	1	NA	NA	2	1	2	2	0	180	NA	0	0	0	0	0	0	0	0	0	NA	NA	0	0	NA	5.83	8.45	NA	2.101	1.709	NA
75828	2	43	3	3	1	1	166.899	100	35.9	112.8	0.80233	NA	39	NA	182	3.6	10.3	357	7.7	1	NA	NA	2	1	4	2	1	840	NA	0	0	1	1	1	0	0	0	0	0	NA	0	0	NA	2.9	3.41	NA	1.266	0.861	NA
109862	2	41	2	4	1	3	160.951	93	35.9	110.7	0.801809	NA	54	NA	209	2.4	3.7	323	6.9	1	NA	NA	2	1	3	2	0	360	NA	1	1	3	3	1	1	3	2	0	1	NA	0	0	NA	1.74	1.07	NA	0.716	0.792	NA
73580	2	38	4	3	1	3	161.383	93.5	35.9	107.4	0.776865	57	55	159	225	1.7	2.8	209	6.7	1	NA	NA	2	1	5	2	0	240	NA	0	0	0	1	0	0	0	0	0	0	NA	0	NA	NA	3.97	NA	NA	1.418	NA	NA
115796	2	40	4	3	3	3	172.722	107.1	35.9	111	0.776103	60	88	92	192	2.5	2.2	226	7	1	NA	NA	2	1	4	2	0	300	NA	1	0	0	1	0	0	0	0	0	0	NA	21	0	NA	2.36	1.85	NA	0.646	1.187	NA
85303	2	45	4	4	3	3	171.264	105.3	35.9	109.4	0.768164	88	49	110	177	1.7	3.1	253	7.2	1	NA	NA	2	1	1	2	0	180	NA	1	0	1	1	0	0	0	0	0	0	NA	0	0	NA	9.34	4.85	NA	0.761	2.14	NA
118292	2	41	1	1	1	1	150.301	81.1	35.9	101.5	0.760773	NA	44	NA	168	1.7	5.4	178	7.1	1	NA	NA	2	1	4	1	1	240	NA	2	0	1	1	3	0	0	0	0	0	NA	0	0	NA	4.47	5.03	NA	2.883	3.58	NA
115962	2	20	2	2	1	1	151.159	81.8	35.8	115.9	0.867848	NA	76	NA	274	1.9	13.6	232	6.4	1	NA	NA	2	1	3	2	0	240	NA	0	0	2	2	0	0	2	0	0	0	NA	0	0	NA	5.51	0.95	NA	3.428	1.27	NA
76574	2	38	1	4	1	1	169.208	102.5	35.8	120	0.849276	NA	42	NA	173	2.7	5.8	295	7.2	1	NA	NA	2	1	4	2	0	360	NA	0	1	1	1	1	0	1	1	0	1	NA	0	0	NA	0.47	0.95	NA	0.929	2.736	NA
78418	2	36	1	2	1	1	147.322	77.7	35.8	110.5	0.838119	NA	60	NA	185	1.9	5.9	204	5.9	1	NA	NA	2	1	6	2	0	180	NA	0	0	1	0	0	0	0	0	0	0	NA	9.4	0	NA	3.92	6.68	NA	2.654	2.203	NA
110234	2	40	4	3	2	1	179.773	115.7	35.8	119	0.817076	50	56	59	125	3.2	3.6	310	7.3	1	NA	NA	2	1	8	2	0	480	NA	0	0	0	1	0	0	0	0	0	0	NA	0	0	NA	2.2	0.71	NA	1.939	0.328	NA
86033	2	35	1	2	3	1	167.299	100.2	35.8	110.9	0.789339	NA	NA	NA	NA	NA	NA	NA	NA	1	NA	NA	2	1	7	2	0	360	NA	1	1	3	2	3	0	0	0	0	0	NA	0	0	NA	2.52	8.15	NA	2.472	1.141	NA
82671	2	30	3	2	1	1	157.05	88.3	35.8	106.2	0.780159	NA	38	NA	221	2.8	3.5	209	6.8	1	NA	NA	2	1	4	2	0	480	NA	1	0	1	1	0	0	0	0	0	0	NA	0	0	NA	2.75	1.62	NA	0.815	1.107	NA
113249	2	43	2	2	2	1	158.29	89.7	35.8	103.8	0.759535	NA	43	NA	157	2.4	4.6	302	7.1	1	NA	NA	2	1	6	2	0	240	NA	1	0	1	0	0	1	0	0	0	1	NA	0	0	NA	1.32	2.28	NA	3.284	1.324	NA
124272	2	43	2	4	3	1	167.549	100.5	35.8	106.2	0.755321	48	80	95	185	1.4	4.5	224	6.8	1	NA	NA	2	1	5	2	0	360	NA	3	1	3	3	3	2	3	2	0	2	NA	0	0	NA	1.47	1.47	NA	1.546	0.898	NA
80272	2	41	1	2	1	1	157.317	88.6	35.8	102.8	0.754542	156	38	158	227	3.3	2.5	267	7.6	1	NA	NA	2	1	2	2	0	360	NA	1	1	0	1	1	0	0	0	0	0	NA	0	0	NA	4.76	8.65	NA	2.487	5.048	NA
75636	2	35	3	4	1	1	162.556	94.6	35.8	96	0.693182	69	52	114	180	2.2	3.8	252	6.3	1	NA	NA	2	1	3	2	0	480	NA	2	0	2	1	2	0	0	0	0	0	NA	28.8	0	NA	5	3.74	NA	2.578	0.795	NA
110981	2	39	3	4	1	1	154.485	85.2	35.7	121.5	0.901615	46	44	119	172	2.2	2.5	281	6.9	1	NA	NA	2	1	2	1	0	300	NA	1	0	3	2	1	0	2	1	0	1	NA	0	0	NA	2.02	2.73	NA	0.399	0.905	NA
76637	2	42	3	4	1	1	162.87	94.7	35.7	121.3	0.876654	34	45	98	150	1.8	4.8	231	6.7	0	NA	NA	2	1	6	2	1	60	NA	0	0	0	1	1	0	0	0	0	0	NA	0	0	NA	3.57	4.62	NA	1.206	0.449	NA
123800	2	45	1	1	1	1	153.21	83.8	35.7	110.1	0.820411	163	50	93	176	2	4.2	202	6.9	1	NA	NA	2	1	3	2	0	60	NA	0	1	2	3	0	0	0	1	0	1	NA	0	0	NA	1.42	2.45	NA	1.822	2.199	NA
117937	2	29	3	5	1	2	157.448	88.5	35.7	107.8	0.792388	NA	53	NA	251	3.8	6.3	351	7	1	NA	NA	2	1	2	2	0	600	NA	0	0	2	2	1	0	0	0	0	0	NA	0	NA	NA	2.23	NA	NA	1.183	NA	NA
112941	2	38	4	4	3	1	157.448	88.5	35.7	107.4	0.789448	NA	NA	NA	NA	1.7	3.3	331	NA	1	NA	NA	2	1	4	2	0	180	NA	1	1	2	3	2	0	0	0	0	0	NA	0	0	NA	1.59	2.22	NA	1.263	1.836	NA
110626	2	33	1	3	1	1	157.715	88.8	35.7	105.6	0.77556	207	23	116	180	2.6	5.4	364	7.2	1	NA	NA	2	1	3	2	0	90	NA	1	0	0	1	0	0	0	0	0	0	NA	0	0	NA	1.77	5.95	NA	1.339	2.998	NA
74006	2	34	4	2	3	1	176.727	111.5	35.7	109.7	0.761102	68	40	81	135	2.1	4.9	280	7.7	1	NA	NA	2	1	1	2	0	480	NA	0	0	0	0	0	0	0	0	0	NA	NA	0	0	NA	3.56	2.65	NA	1.543	0.816	NA
109571	2	28	5	4	3	1	161.106	92.4	35.6	122.5	0.891827	59	58	103	173	1.8	4.3	256	7.2	1	NA	NA	2	1	5	2	0	180	NA	2	2	3	3	2	1	0	0	0	2	NA	0	14	NA	1.92	1.48	NA	2.567	0.924	NA
123736	2	23	3	2	1	1	159.793	90.9	35.6	116.8	0.853816	NA	57	NA	224	1.6	5	264	7.2	3	NA	NA	2	1	4	2	0	780	NA	0	0	1	1	1	0	0	0	0	0	NA	0	0	NA	0.95	6.26	NA	0.777	1.433	NA
92815	2	22	2	3	1	1	169.102	101.8	35.6	117.5	0.834956	NA	51	NA	146	5.2	8.4	294	7.5	0	NA	NA	2	1	1	2	0	120	NA	0	0	0	3	0	0	0	0	0	1	NA	0	0	NA	11.75	1.31	NA	1.735	0.958	NA
84316	2	45	3	5	1	1	164.3	96.1	35.6	112.2	0.808862	NA	48	NA	156	1.8	3.5	266	7.3	1	NA	NA	2	1	4	2	0	240	NA	0	0	0	0	0	0	0	0	0	NA	NA	0	0	NA	1.94	5.4	NA	1.425	1.622	NA
77936	2	43	1	2	1	3	153.791	84.2	35.6	107.2	0.798784	130	49	118	193	2.8	4.6	265	7.5	1	NA	NA	2	1	2	2	0	420	NA	0	1	1	1	1	3	0	0	0	0	NA	0	NA	NA	3.07	NA	NA	2.137	NA	NA
117216	2	23	4	2	1	1	147.736	77.7	35.6	105	0.798264	39	55	81	144	1.9	2.4	256	6.5	1	NA	NA	2	1	3	2	0	240	NA	1	1	0	1	1	0	0	1	0	0	NA	0	0	NA	0.67	0.53	NA	0.285	0.386	NA
110102	2	45	1	3	1	1	162.235	93.7	35.6	109.2	0.792228	198	34	116	190	1.8	3.1	185	7.5	1	NA	NA	2	1	3	2	0	180	NA	1	1	1	1	1	1	1	1	0	0	NA	0	0	NA	11.98	0.65	NA	2.813	0.506	NA
124121	2	39	3	5	1	2	172.392	105.8	35.6	112.1	0.788945	NA	50	NA	196	2.5	5.4	307	7	1	NA	NA	2	1	2	2	0	300	NA	1	0	1	1	0	0	1	0	0	1	NA	33.5	33.5	NA	1.14	6.78	NA	2.052	3.612	NA
113009	2	44	5	5	1	1	146.686	76.6	35.6	102.9	0.785092	NA	43	NA	162	5	5.9	374	7.5	3	NA	NA	2	1	1	2	0	180	NA	0	0	0	0	0	0	0	0	0	NA	NA	NA	NA	NA	NA	NA	NA	NA	NA	NA
75528	2	39	3	3	1	1	154.065	84.5	35.6	104.4	0.777229	121	54	135	213	2.5	5.6	314	7	1	NA	NA	2	1	6	2	0	540	NA	0	0	0	0	0	0	0	0	0	NA	NA	0	NA	NA	6.66	NA	NA	5.934	NA	NA
89620	2	27	5	3	1	1	166.929	99.2	35.6	108	0.772429	224	38	79	162	2.2	5.7	222	7.2	1	NA	NA	2	1	1	2	0	540	NA	2	3	3	2	3	3	2	2	1	1	NA	0	0	NA	17.61	0.9	NA	6.247	0.92	NA
86534	2	43	4	4	3	1	155.336	85.9	35.6	100.8	0.747351	100	62	138	220	3.4	6.5	335	7.3	1	NA	NA	2	1	6	2	0	480	NA	0	0	0	0	0	0	0	0	0	NA	NA	46.8	3.3	NA	4.63	0.65	NA	1.862	0.997	NA
114646	2	40	2	1	1	1	159.176	90.2	35.6	99.5	0.728759	NA	NA	NA	NA	3	7	218	NA	1	NA	NA	2	1	3	2	0	15	NA	1	0	3	1	0	0	0	0	0	0	NA	0	0	NA	0.47	0.03	NA	0.942	0.631	NA
80903	2	30	3	3	2	1	162.581	94.1	35.6	93	0.673982	82	57	130	203	1.8	6.5	293	6	1	NA	NA	2	1	1	2	0	480	NA	0	0	0	0	0	0	0	0	0	NA	NA	0	0	NA	1.25	2.67	NA	1.011	0.517	NA
81672	2	33	1	5	2	1	174.421	108	35.5	132	0.925315	105	77	92	190	1.5	2.6	310	7.5	1	NA	NA	2	1	5	2	0	180	NA	0	0	0	0	0	0	0	0	0	NA	NA	44.6	0	NA	5.92	5.14	NA	2.123	2.253	NA
74125	2	39	3	3	1	3	161.681	92.8	35.5	120.1	0.874435	NA	55	NA	169	2.9	6.3	294	6.9	1	NA	NA	2	1	4	1	1	120	NA	0	0	0	0	3	0	0	0	0	0	NA	0	0	NA	0.69	1.64	NA	0.224	1.068	NA
89230	2	31	3	4	1	1	163.5	94.9	35.5	119.4	0.864489	249	48	78	176	1.5	3.8	217	6.9	3	NA	NA	2	1	6	2	0	420	NA	0	0	1	0	0	1	0	0	0	0	NA	0	0	NA	7.43	11.26	NA	1.706	2.539	NA
109342	2	43	3	4	2	1	161.07	92.1	35.5	111.1	0.81044	90	61	161	240	2.9	4.6	237	7.5	1	NA	NA	2	1	3	2	0	600	NA	2	2	1	3	3	1	3	0	1	3	NA	12.6	0	NA	2.34	1.65	NA	1.944	0.347	NA
75213	2	40	4	2	3	1	167.836	100	35.5	113.1	0.808228	NA	NA	NA	NA	NA	NA	NA	NA	1	NA	NA	2	1	5	2	0	480	NA	0	0	3	3	2	0	0	0	0	0	NA	0	0	NA	8.14	1.54	NA	2.731	2.838	NA
75329	2	43	3	4	3	1	156.007	86.4	35.5	106.6	0.790133	72	70	130	214	2.6	8.8	352	7	1	NA	NA	2	1	3	2	0	120	NA	0	1	0	0	0	0	0	0	1	1	NA	35	0	NA	5.61	1.59	NA	0.99	1.434	NA
114060	2	25	4	4	1	1	156.547	87	35.5	105.5	0.780628	NA	60	NA	199	2.4	3.6	302	7	1	NA	NA	2	1	5	2	0	360	NA	0	0	1	1	1	0	0	0	0	0	NA	0	0	NA	2.95	2.25	NA	1.93	2.826	NA
111726	2	43	4	5	2	3	162.116	93.3	35.5	106.4	0.773647	NA	60	NA	169	1.8	4	236	6.7	1	NA	NA	2	1	2	2	0	540	NA	1	0	2	1	0	0	0	0	0	0	NA	0	14	NA	10.68	1.04	NA	2.562	0.791	NA
91834	2	39	4	4	3	1	167.164	99.2	35.5	106.5	0.762594	NA	66	NA	172	3.1	2.4	190	6.3	1	NA	NA	2	1	3	2	0	600	NA	0	0	0	0	0	0	0	0	0	NA	NA	NA	NA	NA	NA	NA	NA	NA	NA	NA
76351	2	43	2	1	1	1	150.047	79.7	35.4	110.7	0.838234	268	32	108	194	1.9	3.6	213	6.6	1	NA	NA	2	1	6	2	0	600	NA	3	3	3	3	3	3	0	1	2	3	NA	NA	NA	NA	NA	NA	NA	NA	NA	NA
92555	2	37	3	2	2	1	162.519	93.5	35.4	114	0.829438	NA	49	NA	141	4.2	11.4	247	5.8	1	NA	NA	2	1	3	2	0	360	NA	1	1	1	1	1	2	2	2	0	1	NA	0	0	NA	0.9	1.62	NA	0.248	0.765	NA
85779	2	35	1	3	1	3	168.493	100.5	35.4	115.4	0.824606	134	43	77	147	2.1	5	239	7.3	1	NA	NA	2	1	3	1	0	720	NA	0	0	1	1	1	0	0	0	0	0	NA	0	NA	NA	7.85	NA	NA	3.3	NA	NA
121114	2	29	1	4	1	1	167.737	99.6	35.4	114.1	0.817152	68	53	107	174	1.8	3.7	249	7.5	1	NA	NA	2	1	3	2	0	180	NA	0	0	0	0	0	0	1	0	0	0	NA	0	0	NA	1.28	3.02	NA	0.576	1.062	NA
89730	2	32	4	4	3	1	163.817	95	35.4	112	0.811651	NA	42	NA	190	3.1	2.9	197	7	0	NA	NA	2	1	4	2	1	600	NA	1	1	3	3	2	1	1	1	0	2	NA	0	0	NA	0.74	25.29	NA	0.925	1.439	NA
112077	2	25	5	3	1	1	169.746	102	35.4	113.2	0.805895	NA	47	NA	145	2.9	3.1	189	7.5	0	NA	NA	2	1	1	2	0	480	NA	0	0	0	0	0	0	0	0	0	NA	NA	0	0	NA	0.81	1.63	NA	2.051	1.059	NA
84915	2	45	1	4	1	1	161.385	92.2	35.4	110	0.803141	NA	28	NA	163	1.1	4.5	220	6.8	1	NA	NA	1	1	1	2	1	540	NA	0	0	0	0	0	0	0	0	0	NA	NA	0	0	NA	2.28	1.34	NA	1.962	0.846	NA
86322	2	39	2	4	3	1	161.298	92.1	35.4	103.1	0.752967	NA	45	NA	237	2.4	5.9	276	7.1	3	NA	NA	2	1	4	1	0	30	NA	0	0	1	1	0	0	0	0	0	0	NA	0	0	NA	2.73	1.53	NA	2.803	1.848	NA
93511	2	40	4	3	3	1	167.298	98.8	35.3	129.7	0.931847	107	43	114	178	1.8	3	283	8.3	3	NA	NA	1	1	5	2	0	120	NA	0	0	0	0	0	0	0	0	0	NA	NA	0	NA	NA	5.53	NA	NA	2.348	NA	NA
76193	2	39	2	4	1	1	147.404	76.7	35.3	111.3	0.851903	NA	56	NA	186	2.2	5.1	257	6.9	3	NA	NA	2	1	2	2	0	480	NA	2	1	0	1	2	0	0	1	0	0	NA	0	0	NA	6.67	3.49	NA	1.497	2.042	NA
92225	2	42	1	5	3	1	147.596	76.9	35.3	108.2	0.827636	NA	36	NA	171	2.3	3.4	300	6.4	1	NA	NA	2	1	4	2	1	480	NA	1	0	1	2	1	1	0	0	0	1	NA	0	0	NA	7.25	19.51	NA	2.408	6.162	NA
81122	2	37	4	4	1	1	155.904	85.8	35.3	110.8	0.824635	NA	55	NA	202	2.3	2.3	260	7.5	1	NA	NA	2	1	3	2	0	180	NA	0	0	0	1	0	0	0	0	0	0	NA	0	0	NA	2.36	7.42	NA	0.727	1.644	NA
89639	2	29	3	5	1	1	177.965	111.8	35.3	117.7	0.819898	111	40	103	165	2.5	4.5	293	7.6	1	NA	NA	1	1	3	1	1	480	NA	3	1	3	3	1	0	1	0	0	0	NA	0	0	NA	1.7	1.05	NA	0.607	1.406	NA
93676	2	35	4	5	3	1	161.614	92.2	35.3	110.9	0.810667	NA	NA	NA	NA	NA	NA	NA	NA	1	NA	NA	3	1	2	2	0	300	NA	0	0	1	1	0	0	0	0	0	0	NA	0	0	NA	4.36	3.57	NA	2.242	2.681	NA
87053	2	34	1	1	3	1	165.254	96.4	35.3	112.1	0.810364	NA	59	NA	173	1.5	2.5	165	6.9	1	NA	NA	2	1	3	2	0	360	NA	1	1	0	1	0	0	3	1	0	0	NA	0	0	NA	4.7	2.65	NA	2.127	0.514	NA
83851	2	37	3	3	1	1	155.266	85.1	35.3	106.5	0.794257	65	39	145	197	3.4	5.3	469	7.4	1	NA	NA	2	1	5	2	0	300	NA	0	0	0	0	0	0	0	0	0	NA	NA	0	0	NA	3.36	0.68	NA	1.875	1.86	NA
88138	2	44	2	5	3	1	158.427	88.6	35.3	107.1	0.790724	51	82	134	226	1.3	3.6	216	7	1	NA	NA	2	1	3	2	1	720	NA	0	0	1	1	0	0	0	0	0	0	NA	0	0	NA	1.62	0.82	NA	2.092	2.892	NA
76643	2	41	4	4	1	1	157.62	87.7	35.3	106.2	0.786083	59	54	116	182	2.5	3.8	279	7.2	1	NA	NA	2	1	3	1	1	720	NA	0	0	1	1	0	0	1	0	0	0	NA	8	0	NA	20.06	3.18	NA	2.385	2.02	NA
78821	2	38	2	3	1	1	155.54	85.4	35.3	104.2	0.776421	NA	41	NA	195	2.1	3.1	237	6.6	1	NA	NA	2	1	4	2	0	120	NA	0	0	0	3	3	0	0	0	0	0	NA	38.2	0	NA	2.38	0.47	NA	0.988	1.238	NA
111533	2	25	3	3	1	1	165.254	96.4	35.3	106.1	0.766991	78	52	86	154	2.4	4.1	254	7.3	1	NA	NA	2	1	3	1	1	120	NA	1	0	2	2	1	0	0	1	0	1	NA	0	0	NA	1.21	0.88	NA	1.675	1.16	NA
75422	2	41	3	2	3	1	162.401	93.1	35.3	102.8	0.749635	NA	37	NA	146	2.8	5.9	234	6.6	1	NA	NA	2	1	5	2	0	180	NA	0	0	0	1	2	0	2	0	0	0	NA	0	0	NA	2.63	1.92	NA	0.497	1.156	NA
120971	2	41	5	4	1	1	162.749	93.5	35.3	101.1	0.736448	NA	55	NA	178	3.3	8.6	431	7.6	1	NA	NA	2	1	5	2	0	360	NA	0	0	0	1	0	0	0	0	0	0	NA	0	NA	NA	2.11	NA	NA	1.281	NA	NA
81602	2	37	3	5	3	3	172.056	104.5	35.3	102.5	0.726171	80	74	165	255	1.4	3.3	252	7.8	1	NA	NA	2	1	1	2	0	300	NA	0	0	0	0	0	0	0	0	0	NA	NA	0	0	NA	8.67	4.23	NA	2.519	1.823	NA
112370	2	40	2	3	1	1	147.998	77.1	35.2	113.8	0.870935	NA	49	NA	160	3.8	4.5	247	7.3	1	NA	NA	2	1	4	1	1	60	NA	3	1	3	3	2	0	1	0	0	1	NA	0	0	NA	6.03	4.41	NA	4.096	3.546	NA
122684	2	26	2	4	1	3	154.571	84.1	35.2	112.2	0.840236	NA	65	NA	87	3	4.5	228	7.5	1	NA	NA	2	1	4	2	1	240	NA	0	1	1	2	0	1	0	0	0	0	NA	0	NA	NA	1.64	NA	NA	1.127	NA	NA
83837	2	45	1	2	1	1	148.381	77.5	35.2	107.6	0.822421	NA	52	NA	193	2.4	4.1	251	7.2	3	NA	NA	1	1	7	1	0	180	NA	0	0	1	1	1	0	0	0	0	0	NA	0	0	NA	1.92	2.66	NA	1.448	0.756	NA
123338	2	37	3	2	1	1	159.901	90	35.2	107.7	0.79298	63	41	81	135	2.3	4.3	328	7.1	1	NA	NA	2	1	7	2	0	300	NA	2	0	0	1	0	0	0	0	0	0	NA	0	0	NA	5.08	1.09	NA	2.351	1.611	NA
90700	2	40	4	5	3	1	168.55	100	35.2	110.5	0.792446	82	60	139	215	1.5	4.6	328	7.3	1	NA	NA	1	1	3	1	0	480	NA	0	0	1	1	0	0	0	0	0	0	NA	0	0	NA	1.23	4.84	NA	1.078	1.956	NA
88352	2	27	1	1	1	1	159.367	89.4	35.2	103.4	0.762594	NA	48	NA	274	3.2	5.6	302	7.6	1	NA	NA	1	1	1	1	1	30	NA	0	0	0	0	0	0	0	0	0	NA	NA	42.1	28.1	NA	0.78	3.61	NA	2.292	1.428	NA
123562	2	43	3	3	1	1	173.862	106.1	35.1	128	0.905531	163	39	90	162	2.6	3.9	205	7.2	0	NA	NA	1	1	2	2	0	300	NA	0	0	1	1	1	0	2	0	0	1	NA	0	0	NA	3.01	4.63	NA	2.26	2.057	NA
81669	2	39	3	4	2	1	142.425	71.2	35.1	102	0.797264	NA	24	NA	225	2.3	5	222	6.9	1	NA	NA	2	1	2	1	0	480	NA	0	0	2	3	0	0	0	0	0	0	NA	0	NA	NA	6.02	NA	NA	2.066	NA	NA
81966	2	31	5	4	1	1	165.638	96.3	35.1	107.2	0.776981	73	44	90	149	1.6	4.6	310	7.2	1	NA	NA	2	1	4	1	0	120	NA	1	1	1	1	1	1	1	1	0	2	NA	0	0	NA	3.77	4.32	NA	0.982	1.181	NA
115369	2	44	4	3	2	1	164.862	95.4	35.1	101.4	0.73667	NA	64	NA	251	3.2	2.6	276	7	0	NA	NA	2	1	3	2	0	120	NA	1	1	0	1	1	0	0	0	0	0	NA	0	0	NA	0.22	0.51	NA	0.704	0.834	NA
121350	2	42	1	4	2	1	155.25	84.6	35.1	98.3	0.735924	71	64	122	200	5.3	5.7	278	6.6	1	NA	NA	2	1	5	2	0	1080	NA	0	0	0	0	0	0	0	0	0	NA	NA	0	0	NA	0.57	0.94	NA	1.729	1.444	NA
120737	2	20	2	4	3	1	157.208	86.5	35	112.5	0.838565	92	55	119	192	1	7.3	217	6.9	1	NA	NA	2	1	2	2	0	40	NA	0	0	1	1	1	1	1	3	0	0	NA	NA	NA	NA	NA	NA	NA	NA	NA	NA
112248	2	32	5	4	3	1	161.068	90.8	35	110.9	0.816673	183	36	147	220	2	3.1	260	7.4	0	NA	NA	2	1	3	2	0	180	NA	1	1	1	1	1	1	0	0	0	1	NA	0	0	NA	0.33	1.2	NA	1.323	0.582	NA
118518	2	39	4	5	2	1	161.334	91.1	35	110.7	0.814529	70	61	79	154	2.5	3.9	185	6.6	1	NA	NA	1	1	9	1	0	600	NA	1	2	2	3	2	2	3	1	1	3	NA	0	0	NA	1.8	0	NA	0.903	0	NA
87969	2	38	1	5	1	2	152.503	81.4	35	106.5	0.805994	NA	54	NA	250	2.4	5.7	333	7.2	1	NA	NA	2	1	1	2	0	60	NA	0	0	1	1	0	0	0	0	0	0	NA	0	0	NA	2.35	4.09	NA	1.834	1.874	NA
84672	2	39	4	3	3	1	158.745	88.2	35	107.9	0.800373	NA	69	NA	175	4.2	5.2	314	7.5	1	NA	NA	2	1	2	2	0	600	NA	2	0	1	1	0	0	0	0	0	0	NA	0	NA	NA	4.47	NA	NA	1.733	NA	NA
112765	2	32	4	3	1	1	168.099	98.9	35	109.9	0.792204	NA	NA	NA	NA	NA	NA	NA	NA	1	NA	NA	2	1	2	2	0	240	NA	1	0	1	1	0	0	0	0	0	0	NA	14	0	NA	2.99	6.53	NA	1.854	2.181	NA
121382	2	38	4	4	3	3	170.126	101.3	35	110	0.788186	NA	45	NA	158	1.8	2.3	293	7.3	1	NA	NA	2	1	2	2	0	480	NA	0	0	0	1	1	0	0	0	0	0	NA	NA	NA	NA	NA	NA	NA	NA	NA	NA
116067	2	44	5	4	2	1	170.545	101.8	35	107.6	0.770041	NA	54	NA	171	2.3	5.5	238	6.8	1	NA	NA	2	1	5	2	1	120	NA	0	0	0	1	0	0	0	0	0	1	NA	0	0	NA	13.24	5.43	NA	2.096	1.428	NA
111060	2	23	4	4	3	1	168.268	99.1	35	106.1	0.764426	23	53	97	155	2.3	5.6	188	6.9	1	NA	NA	2	1	1	2	0	300	NA	1	1	0	1	2	0	1	0	0	1	NA	0	0	NA	1.91	1.28	NA	1.164	2.146	NA
119696	2	45	1	1	1	3	147.164	75.8	35	99.1	0.763475	75	44	113	172	2.5	5.9	366	7.1	1	NA	NA	2	1	4	2	0	120	NA	2	0	0	1	0	0	1	0	0	0	NA	0	0	NA	7.85	3.63	NA	1.449	1.387	NA
84780	2	29	2	4	1	1	146.007	74.4	34.9	113.6	0.880321	NA	84	NA	229	2.2	9.6	159	6.4	0	NA	NA	2	1	4	2	0	720	NA	0	1	0	3	0	0	1	0	0	0	NA	0	0	NA	9.99	3.25	NA	3.951	1.607	NA
111688	2	36	4	4	3	1	149.402	77.9	34.9	111.6	0.854941	NA	50	NA	236	1.5	1.9	305	6.7	1	NA	NA	2	1	3	2	0	180	NA	0	0	0	1	0	0	0	0	0	0	NA	0	0	NA	3.61	0.62	NA	1.74	0.901	NA
81885	2	30	3	4	1	3	163.767	93.6	34.9	115.2	0.842926	NA	62	NA	188	2.3	10.3	213	6.4	3	NA	NA	2	1	2	2	0	480	NA	3	1	3	3	0	0	2	0	0	0	NA	0	0	NA	7.29	6.04	NA	1.602	3.723	NA
86050	2	39	4	5	1	1	151.78	80.4	34.9	110.2	0.837575	NA	36	NA	220	3.1	5.4	191	7.3	3	NA	NA	2	1	5	9	1	180	NA	0	0	0	0	0	0	0	0	0	NA	NA	0	0	NA	12.85	15.24	NA	2.709	3.94	NA
78542	2	41	1	1	1	1	158.611	87.8	34.9	111.2	0.826775	NA	48	NA	228	3.3	6.1	243	7.4	1	NA	NA	1	1	5	1	0	480	NA	1	1	0	1	1	1	0	0	0	1	NA	0	NA	NA	4.75	NA	NA	2.537	NA	NA
80966	2	27	4	4	3	1	163.679	93.5	34.9	103.7	0.758983	139	65	149	242	2.3	2.6	194	6.9	1	NA	NA	2	1	1	2	0	660	NA	0	0	0	0	0	0	0	0	0	NA	NA	0	0	NA	5.63	7.63	NA	2.02	1.631	NA
119277	2	35	3	4	1	1	160.728	89.9	34.8	119.3	0.882827	149	41	129	200	1.6	4.1	213	7.1	1	NA	NA	2	1	2	1	0	180	NA	0	0	0	1	1	0	0	0	0	0	NA	0	0	NA	3.51	3.57	NA	1.15	0.968	NA
80564	2	45	3	5	1	2	159.11	88.1	34.8	110.9	0.824827	NA	72	NA	203	2.2	5.9	281	6.7	1	NA	NA	2	1	1	2	1	600	NA	0	0	0	0	0	0	0	0	0	NA	NA	0.1	15.5	NA	3.46	4.06	NA	2.594	1.516	NA
118419	2	31	4	4	1	1	153.034	81.5	34.8	108.3	0.821324	NA	29	NA	211	3.3	6.1	271	7.9	0	NA	NA	2	1	6	1	0	600	NA	0	0	0	0	0	0	0	0	0	NA	NA	0	0	NA	4.05	7.39	NA	2.417	1.333	NA
88868	2	38	4	2	3	1	165.311	95.1	34.8	111.9	0.816508	NA	66	NA	167	2.4	4.2	326	7.8	1	NA	NA	2	1	3	2	0	300	NA	1	3	0	0	0	0	0	0	0	0	NA	0	0	NA	1.98	5.48	NA	1.339	1.7	NA
76236	2	40	1	4	1	1	157.294	86.1	34.8	107	0.800402	117	63	94	180	2.5	4.6	339	6.7	1	NA	NA	1	1	2	2	0	780	NA	0	1	0	1	1	1	2	0	0	1	NA	0	0	NA	4.03	2.29	NA	1.001	0.969	NA
78263	2	41	1	2	1	1	151.05	79.4	34.8	104.6	0.798458	NA	43	NA	166	1.9	3.6	224	7.3	3	NA	NA	2	1	3	1	0	180	NA	0	0	0	0	1	0	0	0	0	0	NA	0	0	NA	1.33	2.49	NA	1.127	1.456	NA
92788	2	31	3	3	1	1	163.651	93.2	34.8	102.7	0.753168	101	57	135	212	3.3	3.4	231	6.9	1	NA	NA	2	1	3	1	1	600	NA	0	0	0	0	1	2	0	0	0	0	NA	0	0	NA	1.58	1.16	NA	0.842	0.772	NA
117685	2	40	4	5	1	2	163.475	93	34.8	97.6	0.716151	NA	60	NA	166	2.4	2.8	252	7.3	1	NA	NA	2	1	1	2	1	300	NA	0	0	0	0	0	0	0	0	0	NA	NA	0	0	NA	4.82	2.13	NA	1.912	1.179	NA
122318	2	25	3	2	1	1	159.61	88.4	34.7	115.2	0.857108	NA	45	NA	174	1.8	7.4	208	6.6	1	NA	NA	2	1	3	2	0	540	NA	3	3	3	3	2	3	0	0	0	1	NA	0	0	NA	6.66	0.25	NA	1.428	0.74	NA
115219	2	35	3	5	1	1	171.197	101.7	34.7	119.1	0.855613	NA	65	NA	176	2.2	4.4	325	7	3	NA	NA	2	1	2	2	1	300	NA	1	1	2	2	0	0	0	0	0	0	NA	0	0	NA	9.04	7.48	NA	4.452	3.311	NA
116890	2	41	4	5	3	1	178.127	110.1	34.7	120.6	0.849369	67	48	71	132	2.8	4	291	7.4	1	NA	NA	3	1	6	1	0	60	NA	0	0	0	1	0	0	0	0	0	0	NA	0	0	NA	5.36	6.88	NA	2.153	2.004	NA
113830	2	31	5	5	1	1	157.703	86.3	34.7	113.2	0.847305	158	105	171	308	2.1	6.3	246	6.3	0	NA	NA	2	1	7	2	0	480	NA	3	2	1	1	1	1	1	0	0	1	NA	0	0	NA	1.46	2.77	NA	1.456	1.5	NA
114327	2	39	3	5	1	3	171.281	101.8	34.7	116.7	0.838166	NA	40	NA	166	3.2	7.1	300	7.5	1	NA	NA	2	1	2	2	0	900	NA	1	0	0	0	0	0	1	0	0	1	NA	0	37.4	NA	6.12	4.76	NA	2.26	1.728	NA
88339	2	43	3	4	1	1	160.421	89.3	34.7	107.6	0.798538	47	71	104	184	2.5	4.3	269	6.4	1	NA	NA	2	1	4	2	0	120	NA	0	0	0	1	0	0	0	0	0	0	NA	28.1	0	NA	5.71	5.13	NA	1.743	1.664	NA
91921	2	45	5	3	3	1	154.192	82.5	34.7	103.2	0.7812	NA	48	NA	222	3.2	5.4	298	7	3	NA	NA	2	1	2	2	0	480	NA	0	0	0	0	1	0	0	0	0	0	NA	0	0	NA	5.45	5.13	NA	3.633	2.943	NA
111489	2	35	4	4	2	1	156.879	85.4	34.7	102.7	0.77073	34	48	76	131	3.3	3	230	6.9	1	NA	NA	2	1	2	2	0	120	NA	0	0	2	1	0	0	0	0	0	0	NA	0	0	NA	2.56	1.08	NA	1.127	0.981	NA
89601	2	30	3	4	1	1	160.69	89.6	34.7	103	0.763759	48	52	86	148	2.2	4.3	260	7	1	NA	NA	2	1	2	2	0	420	NA	0	0	0	1	2	1	0	0	0	0	NA	0	0	NA	5.33	3	NA	3.347	1.496	NA
115443	2	39	1	1	1	1	154.752	83.1	34.7	100.1	0.756362	195	39	129	207	2	4.6	313	7.2	3	NA	NA	1	1	3	1	0	40	NA	0	0	3	1	0	0	0	0	0	0	NA	0	0	NA	0.71	2.9	NA	0.898	1.903	NA
89233	2	31	3	3	1	1	158.114	86.5	34.6	118.5	0.887529	NA	26	NA	134	2.5	8.3	339	7.1	1	NA	NA	2	1	4	1	0	240	NA	1	1	2	2	0	1	2	2	0	1	NA	0	0	NA	1.93	3.66	NA	0.734	1.898	NA
111633	2	42	3	2	2	1	165.7	95	34.6	116.4	0.851609	171	29	106	169	2.6	7.8	430	6.9	1	NA	NA	2	1	8	2	0	300	NA	0	0	0	0	0	0	0	0	0	NA	NA	0	0	NA	2.18	5.82	NA	0.935	2.392	NA
81613	2	41	3	3	1	1	161.102	89.8	34.6	114.7	0.851065	NA	30	NA	326	2.7	2.7	285	6.7	1	NA	NA	2	1	3	2	0	480	NA	1	1	2	1	1	1	2	0	0	1	NA	0	0	NA	1.94	1.37	NA	0.489	0.381	NA
110780	2	37	4	4	3	1	170.005	100	34.6	111.5	0.805366	NA	43	NA	233	2.5	1.7	264	6.7	1	NA	NA	2	1	3	2	0	300	NA	0	0	1	1	0	0	1	0	0	0	NA	0	0	NA	3.72	3.11	NA	1.109	0.553	NA
109820	2	29	1	3	1	1	160.112	88.7	34.6	107.6	0.800847	NA	42	NA	236	2.6	4.3	225	6.9	1	NA	NA	2	1	3	2	0	120	NA	0	0	0	0	0	0	0	0	0	NA	NA	0	0	NA	1.41	0.79	NA	1.134	0.51	NA
73715	2	38	3	4	1	1	156.921	85.2	34.6	105.3	0.791656	NA	41	NA	155	2.5	5.7	212	6.4	1	NA	NA	1	1	4	2	1	120	NA	1	1	3	3	3	3	3	1	0	3	NA	20.7	0	NA	2.75	4.94	NA	1.862	1.863	NA
77285	2	29	4	2	1	1	163.831	92.6	34.5	111.6	0.822723	50	46	75	131	2.1	2.2	225	6.4	1	NA	NA	2	1	6	2	0	240	NA	0	0	0	1	0	0	0	0	0	0	NA	0	0	NA	0.91	1.85	NA	0.861	0.597	NA
112983	2	28	3	5	1	1	157.425	85.5	34.5	108.9	0.81899	320	41	128	233	3.5	4.9	334	7.4	1	NA	NA	2	1	1	2	0	180	NA	1	0	0	1	1	0	0	1	0	1	NA	0	0	NA	2.55	1.1	NA	2.363	2.172	NA
117605	2	32	4	5	1	1	157.425	85.5	34.5	107.8	0.810717	NA	NA	NA	NA	3.4	2.5	323	NA	1	NA	NA	2	1	5	2	1	180	NA	0	0	1	0	0	0	0	0	0	0	NA	0	0	NA	3.08	3.73	NA	1.3	1.445	NA
121256	2	23	3	2	2	1	162.32	90.9	34.5	108	0.79988	NA	64	NA	176	2.6	6.8	309	7.3	1	NA	NA	2	1	4	2	0	720	NA	2	3	3	3	2	2	1	2	0	3	NA	0	0	NA	1.16	0.7	NA	0.65	0.354	NA
86611	2	28	2	3	1	1	168.11	97.5	34.5	109.6	0.79763	NA	NA	NA	NA	NA	NA	NA	NA	1	NA	NA	2	1	2	2	1	180	NA	0	0	1	2	2	0	0	0	0	0	NA	0	0	NA	0.25	0.85	NA	0.389	0.276	NA
111872	2	38	3	1	2	1	159.71	88	34.5	103	0.769057	43	57	72	138	1.3	4.4	258	6.5	0	NA	NA	2	1	7	2	0	600	NA	0	0	0	0	0	0	0	0	0	NA	NA	0	0	NA	2.6	10.97	NA	1.09	2.005	NA
89284	2	42	1	2	1	1	163.742	92.5	34.5	101.9	0.751417	NA	42	NA	206	1.4	7.9	249	7	3	NA	NA	2	1	4	2	0	120	NA	0	0	0	0	0	0	0	0	0	NA	NA	0	0	NA	5.7	4.5	NA	2.531	1.573	NA
91804	2	45	3	4	1	1	170.931	100.8	34.5	104	0.750603	NA	39	NA	198	2.7	5.6	203	6.7	3	NA	NA	2	1	2	1	1	540	NA	1	1	1	3	0	0	2	1	0	1	NA	0	0	NA	3.87	0.57	NA	1.151	0.396	NA
87243	2	33	2	1	2	1	147.933	75.5	34.5	95	0.737019	67	54	105	172	2.3	3.8	273	6.8	1	NA	NA	2	1	4	2	0	180	NA	1	0	0	1	1	0	0	1	0	0	NA	0	NA	NA	1.21	NA	NA	0.691	NA	NA
116551	2	38	3	4	1	1	163.27	91.7	34.4	113.6	0.84053	NA	70	NA	203	2.8	6.2	448	7.1	1	NA	NA	2	1	3	2	0	540	NA	0	0	3	2	0	0	0	0	0	0	NA	0	0	NA	2.11	2.28	NA	0.518	0.79	NA
116076	2	32	2	4	1	1	168.785	98	34.4	112.7	0.820134	238	35	70	153	1.9	4.5	214	6.8	1	NA	NA	2	1	7	2	1	600	NA	0	0	0	0	1	0	0	0	0	0	NA	0	0	NA	0.95	0.72	NA	1.522	0.85	NA
89711	2	36	3	5	1	1	158.298	86.2	34.4	108.4	0.814554	54	69	101	181	1.8	3.2	173	6.8	1	NA	NA	2	1	2	2	0	480	NA	0	0	1	1	0	0	0	0	0	0	NA	0	0	NA	1.35	5.91	NA	1.257	1.558	NA
88485	2	40	1	1	1	3	152.499	80	34.4	106.3	0.813819	66	29	73	115	2.1	8.9	484	6.4	3	NA	NA	2	1	4	1	0	240	NA	0	0	0	0	0	0	0	0	0	NA	NA	0	0	NA	5.69	2.65	NA	1.819	0.689	NA
73846	2	24	4	4	3	1	155.985	83.7	34.4	105.8	0.800888	NA	47	NA	122	1.8	4	243	6.9	1	NA	NA	2	1	1	2	0	360	NA	0	0	0	0	0	0	0	0	0	NA	NA	18.6	0	NA	0.77	2.22	NA	0.564	0.74	NA
86838	2	44	3	4	1	2	163.892	92.4	34.4	107.9	0.796839	135	31	154	212	3	5.2	252	7.7	1	NA	NA	2	1	6	2	0	360	NA	0	0	0	0	0	0	0	0	0	NA	NA	0	NA	NA	2.32	NA	NA	2.763	NA	NA
118258	2	29	3	4	1	1	158.206	86.1	34.4	104.6	0.786227	101	66	122	208	2.9	3.9	236	7.2	1	NA	NA	2	1	1	2	0	120	NA	1	1	1	2	3	1	1	0	0	1	NA	57	0	NA	6.08	0.76	NA	1.89	0.537	NA
82095	2	40	4	5	3	1	171.009	100.6	34.4	107.1	0.774296	NA	67	NA	160	1.9	2.7	347	7.7	1	NA	NA	2	1	2	1	0	420	NA	0	0	1	0	0	0	0	0	0	0	NA	0	0	NA	4.45	0.94	NA	1.11	1.726	NA
78132	2	22	3	2	1	1	165.392	94.1	34.4	103.7	0.76234	68	42	73	129	1.8	6.5	256	7.1	1	NA	NA	2	1	1	2	0	240	NA	0	0	1	1	0	0	1	0	0	0	NA	23.4	0	NA	12.71	12.9	NA	11.731	13.635	NA
91530	2	26	4	4	3	1	165.305	94	34.4	103	0.757395	93	68	114	201	2	3.3	208	7.1	1	NA	NA	2	1	3	2	0	300	NA	0	0	0	0	0	0	0	0	0	NA	NA	0	NA	NA	1.51	NA	NA	1.042	NA	NA
80190	2	33	5	4	3	1	147.853	75.2	34.4	96	0.746421	NA	50	NA	200	2.8	5.1	416	7.1	1	NA	NA	2	1	7	2	0	360	NA	0	0	0	0	0	0	0	0	0	NA	NA	14	0	NA	3.57	1.23	NA	1.279	1.082	NA
83875	2	42	4	5	1	1	163.181	91.6	34.4	99.4	0.735665	NA	66	NA	117	1.9	2.7	250	6.6	3	NA	NA	2	1	4	2	0	180	NA	0	0	0	0	0	0	0	0	0	NA	NA	0	NA	NA	4.4	NA	NA	1.263	NA	NA
86384	2	37	3	1	3	1	160.175	88	34.3	116.1	0.868972	222	41	143	228	2	3.6	113	6.7	1	NA	NA	1	1	2	1	0	180	NA	0	0	1	1	1	0	0	0	0	0	NA	0	0	NA	2.07	2.76	NA	1.964	1.269	NA
121394	2	43	4	4	3	1	167.384	96.1	34.3	116	0.84932	152	44	121	195	3.2	3.9	288	7.7	1	NA	NA	1	1	10	1	0	480	NA	0	0	1	1	0	0	0	0	0	0	NA	0	NA	NA	2.54	NA	NA	0.563	NA	NA
111296	2	40	4	4	3	1	162.793	90.9	34.3	113.1	0.839684	NA	42	NA	209	2.2	8.1	225	6.5	1	NA	NA	2	1	5	2	0	600	NA	1	0	1	1	1	0	0	0	0	0	NA	42.1	NA	NA	0.44	NA	NA	0.295	NA	NA
75391	2	31	2	3	2	1	163.24	91.4	34.3	111.2	0.824446	212	34	130	206	2.5	4.5	274	6.8	0	NA	NA	2	1	5	2	0	480	NA	0	0	0	0	0	0	0	0	0	NA	NA	0	0	NA	3.04	2.91	NA	0.827	1.309	NA
118606	2	32	4	4	1	1	173.205	102.9	34.3	112.6	0.810455	97	92	112	223	1.9	4.1	284	6.6	1	NA	NA	2	1	7	2	0	30	NA	0	0	0	2	0	0	0	0	0	0	NA	0	0	NA	13.81	6.67	NA	5.257	2.435	NA
77001	2	40	3	4	1	1	158.712	86.4	34.3	107.2	0.806047	420	33	NA	212	2.3	7.7	247	6.1	1	NA	NA	1	1	6	2	0	120	NA	0	0	0	0	0	0	0	0	0	NA	NA	0	0	NA	3.45	5.81	NA	0.685	1.788	NA
122745	2	26	4	2	3	1	153.292	80.6	34.3	98.6	0.754375	NA	NA	NA	NA	NA	NA	NA	NA	1	NA	NA	2	1	3	2	0	240	NA	0	0	0	3	0	0	0	1	0	1	NA	0	0	NA	2.94	1.24	NA	0.566	0.404	NA
120464	2	24	4	4	3	3	180.459	111.7	34.3	104.4	0.736175	NA	66	NA	161	1.6	5.8	179	8.1	1	NA	NA	2	1	4	1	0	120	NA	0	2	2	2	2	0	0	0	0	0	NA	0	0	NA	3.1	4.85	NA	1.204	1.812	NA
74829	2	27	1	2	1	1	163.478	91.4	34.2	123.1	0.913785	NA	66	NA	188	2.1	5.6	234	6	0	NA	NA	2	1	7	1	0	180	NA	0	0	0	3	1	0	0	0	0	0	NA	0	0	NA	2.18	4.77	NA	1.115	2.081	NA
119984	2	41	3	4	3	1	159.22	86.7	34.2	116.6	0.877034	NA	34	NA	227	2.8	7.3	194	7.1	1	NA	NA	2	1	1	1	1	60	NA	0	0	2	2	0	0	0	2	0	1	NA	0	0	NA	1.41	1	NA	0.299	1.996	NA
116001	2	45	5	4	1	1	161.68	89.4	34.2	115.5	0.862125	158	41	129	202	2.9	4	318	7.4	3	NA	NA	3	1	3	2	0	480	NA	0	1	0	1	0	0	0	0	0	0	NA	0	NA	NA	3.32	NA	NA	1.408	NA	NA
75538	2	36	1	1	1	1	143.576	70.5	34.2	106.2	0.841201	NA	36	NA	153	2.1	3.2	238	7.3	3	NA	NA	2	1	3	2	0	480	NA	0	0	0	1	0	0	0	0	0	0	NA	0	0	NA	6.34	5.43	NA	4.821	4.111	NA
91938	2	32	1	2	1	1	146.199	73.1	34.2	103.3	0.810855	NA	32	NA	211	3.5	4.4	263	7.2	1	NA	NA	2	1	2	2	0	60	NA	1	0	0	1	0	0	0	0	0	0	NA	0	0	NA	3.36	2.1	NA	1.559	2.051	NA
74652	2	40	1	3	1	1	159.678	87.2	34.2	105	0.788647	242	51	134	233	2.1	3.9	369	6.4	1	NA	NA	2	1	7	2	0	240	NA	0	0	0	1	1	0	0	0	0	0	NA	0	0	NA	4.42	4.02	NA	2.184	1.916	NA
116947	2	27	4	3	3	1	144.793	71.7	34.2	97.5	0.769037	NA	47	NA	161	1.8	3.1	286	7	1	NA	NA	2	1	5	2	0	300	NA	0	0	1	1	0	0	0	0	0	0	NA	0	0	NA	1.57	3.02	NA	0.998	1.125	NA
91893	2	33	5	4	1	1	155.691	82.9	34.2	100.4	0.763691	64	41	150	204	1.8	3	209	7	1	NA	NA	2	1	3	2	1	180	NA	0	0	1	1	1	0	0	0	0	0	NA	0	NA	NA	0.24	NA	NA	1.876	NA	NA
84989	2	37	5	3	1	1	172.016	100.9	34.1	115.2	0.83528	74	51	126	192	2.7	6.7	225	6.3	1	NA	NA	2	1	5	2	1	240	NA	2	1	0	1	1	0	1	1	0	1	NA	0	0	NA	6.3	1.91	NA	2.176	0.687	NA
110266	2	29	4	4	1	3	156.013	83	34.1	108.4	0.8253	NA	55	NA	163	2.1	3.1	318	7.7	0	NA	NA	2	1	5	2	0	600	NA	0	0	0	1	0	0	0	0	0	0	NA	0	0	NA	4.45	2.31	NA	2.301	1.695	NA
113687	2	45	4	4	1	2	158.16	85.3	34.1	105.3	0.796239	NA	40	NA	167	2.6	3.3	395	7	1	NA	NA	1	1	4	2	0	240	NA	0	0	0	0	0	0	0	0	0	NA	NA	0	0	NA	10.87	5.12	NA	2.576	1.729	NA
84349	2	39	3	4	3	1	160.735	88.1	34.1	104.8	0.786085	NA	57	NA	159	2.6	3	239	6.4	1	NA	NA	2	1	3	2	0	720	NA	0	0	1	1	0	0	0	0	0	0	NA	14.4	0	NA	1.24	2.98	NA	6.277	1.682	NA
80820	2	36	2	4	1	1	166.295	94.3	34.1	105.8	0.780207	NA	53	NA	201	2.1	5.5	372	7.5	1	NA	NA	2	1	2	2	0	600	NA	0	0	0	0	0	0	0	0	0	NA	NA	0	0	NA	2.84	3.91	NA	0.839	0.666	NA
89994	2	45	2	2	1	1	158.623	85.8	34.1	100.5	0.758834	NA	42	NA	132	2.5	5.2	266	7.6	3	NA	NA	2	1	5	2	0	180	NA	0	0	0	0	0	0	0	0	0	NA	NA	0	0	NA	4.24	2.36	NA	2.195	2.28	NA
118628	2	44	4	3	1	1	172.098	100.7	34	113.6	0.825097	98	51	88	159	2.2	4.4	265	6.3	1	NA	NA	2	1	8	2	0	480	NA	0	0	0	0	0	0	0	0	0	NA	NA	0	0	NA	0.7	2.8	NA	0.766	0.712	NA
123566	2	37	1	2	1	1	154.824	81.5	34	106.2	0.81324	85	50	107	174	2.4	3.7	263	8	1	NA	NA	2	1	7	2	0	360	NA	1	1	1	1	0	0	1	0	0	1	NA	0	0	NA	14.35	4.04	NA	3.384	1.266	NA
87080	2	33	2	1	1	1	145.723	72.2	34	102.2	0.806678	115	46	116	185	3.4	4.1	273	7	3	NA	NA	2	1	2	2	0	240	NA	0	0	1	1	0	0	0	0	0	0	NA	0	0	NA	0.12	1.93	NA	0.356	0.502	NA
78430	2	37	1	1	1	1	150.977	77.5	34	103.7	0.80415	209	43	141	226	2.5	4.8	403	7.4	3	NA	NA	2	1	3	2	0	420	NA	0	0	0	0	0	0	0	0	0	NA	NA	0	0	NA	0.77	2.55	NA	3.214	3.441	NA
75506	2	25	1	4	1	1	169.168	97.3	34	109.4	0.801443	78	43	56	115	3.4	2.5	168	7.3	1	NA	NA	2	1	1	2	0	240	NA	0	0	0	0	0	0	0	0	0	NA	NA	0	0	NA	1.97	3.74	NA	1.393	1.665	NA
119892	2	24	4	3	2	1	165.031	92.6	34	107.5	0.797333	25	59	97	161	2	3.4	271	7	1	NA	NA	2	1	4	2	0	180	NA	0	0	0	0	0	0	1	0	0	0	NA	0	0	NA	3.3	4.65	NA	1.581	0.775	NA
91852	2	24	4	3	3	3	164.853	92.4	34	106.1	0.787374	NA	42	NA	147	2.1	3.1	302	7	1	NA	NA	2	1	4	2	0	600	NA	0	0	0	0	0	0	0	0	0	NA	NA	0	0	NA	5.47	0.38	NA	1.136	0.646	NA
89685	2	41	1	2	1	1	158.949	85.9	34	103.4	0.781459	NA	54	NA	207	1.7	5.8	264	7	1	NA	NA	2	1	1	2	0	120	NA	1	1	1	1	1	0	0	1	0	1	NA	0	18.1	NA	3.79	1.6	NA	2.113	1.356	NA
74686	2	32	1	2	1	1	153.967	80.6	34	100.6	0.772499	NA	45	NA	243	1.9	2.2	316	7.8	1	NA	NA	2	1	2	2	0	480	NA	0	0	0	2	2	0	0	0	0	0	NA	0	0	NA	1.72	5.09	NA	0.948	1.775	NA
79213	2	31	3	3	1	1	168.034	96	34	95.3	0.700501	52	53	63	126	1.7	2.2	269	6.8	1	NA	NA	3	1	1	2	0	600	NA	0	0	0	1	0	0	0	0	0	0	NA	0	0	NA	3.13	6.76	NA	2.003	1.771	NA
90366	2	28	4	2	3	1	164.2	91.4	33.9	114.6	0.853817	NA	41	NA	144	0.6	3	268	7.6	3	NA	NA	2	1	5	2	0	240	NA	3	0	0	0	0	0	0	0	0	0	NA	0	0	NA	7.26	2.05	NA	1.248	0.683	NA
115235	2	45	4	2	3	1	169.765	97.7	33.9	115	0.842638	NA	67	NA	280	3	2	266	7.4	0	NA	NA	2	1	2	2	0	300	NA	3	2	3	1	2	3	3	0	1	3	NA	0	0	NA	0.94	0.37	NA	0.996	0.958	NA
84641	2	28	4	2	3	1	165.72	93.1	33.9	113	0.838027	NA	38	NA	168	2.1	2.7	260	7.4	3	NA	NA	1	1	2	2	0	180	NA	0	3	0	0	0	0	3	0	0	2	NA	18.2	0	NA	3.4	10.79	NA	1.417	0.924	NA
84062	2	45	1	4	1	1	154.003	80.4	33.9	107.6	0.82778	195	43	119	201	2.4	5.1	238	7.9	3	NA	NA	2	1	6	1	0	120	NA	0	0	0	1	0	0	0	1	0	0	NA	0	0	NA	4.59	0.31	NA	2.576	1.002	NA
110503	2	34	3	3	1	1	164.649	91.9	33.9	109.8	0.81694	175	35	153	223	2.6	5.1	319	7.1	1	NA	NA	2	1	4	2	0	60	NA	0	0	1	3	0	0	0	0	0	0	NA	0	0	NA	3.16	4.08	NA	0.906	1.501	NA
112590	2	43	4	5	1	1	167.05	94.6	33.9	101.5	0.749739	117	55	125	203	2.3	3.8	289	7	1	NA	NA	2	1	3	2	0	180	NA	0	0	0	0	0	0	0	0	0	NA	NA	154.3	37	NA	0.92	2.18	NA	1.064	1.647	NA
92998	2	39	2	4	1	2	162.847	89.9	33.9	100	0.74813	72	54	93	161	1.4	3.6	251	6.9	1	NA	NA	2	1	3	2	1	840	NA	0	0	0	1	0	0	0	0	0	0	NA	0	0	NA	1.26	1.45	NA	0.654	0.439	NA
117606	2	33	4	4	1	3	151.102	77.4	33.9	92.3	0.716858	60	43	142	197	1.6	4.4	315	6.8	1	NA	NA	2	1	5	2	0	360	NA	0	0	0	1	1	0	0	0	0	0	NA	0	0	NA	0.31	1.91	NA	0.273	0.843	NA
86686	2	37	4	5	1	1	165.364	92.7	33.9	95.1	0.706037	41	93	65	166	2	7.6	312	6.8	1	NA	NA	2	1	4	2	0	600	NA	0	0	0	0	0	0	2	0	0	0	NA	0	0	NA	5.73	2.45	NA	1.853	1.257	NA
124486	2	36	3	4	3	1	164.982	92	33.8	116.1	0.864643	364	46	128	247	2.2	4.7	305	7.1	1	NA	NA	2	1	1	2	0	540	NA	0	0	1	1	0	0	0	0	0	0	NA	0	0	NA	0.93	2.83	NA	0.728	1.936	NA
81152	2	34	4	3	1	1	173.632	101.9	33.8	119	0.863883	NA	74	NA	236	1.2	5.9	126	6.1	0	NA	NA	2	1	5	2	0	300	NA	1	0	0	3	0	0	0	2	0	0	NA	0	0	NA	5.95	2.69	NA	2.147	0.968	NA
83914	2	23	2	4	3	1	171.402	99.3	33.8	115.4	0.843179	NA	80	NA	290	1.6	7.7	367	6	1	NA	NA	2	1	1	2	0	360	NA	1	0	1	1	3	0	0	0	0	0	NA	0	0	NA	6.21	1.67	NA	2.515	0.89	NA
111970	2	35	3	4	1	1	155.567	81.8	33.8	109	0.835968	NA	62	NA	201	2.1	6.5	353	7.2	1	NA	NA	2	1	5	2	0	480	NA	1	1	1	2	3	1	0	0	0	1	NA	0	0	NA	3.75	5.67	NA	2.607	1.485	NA
77607	2	42	3	1	1	1	164.263	91.2	33.8	108.1	0.806823	NA	45	NA	206	2.6	2.5	383	6.9	1	NA	NA	2	1	5	2	0	600	NA	3	2	3	3	3	1	1	0	0	2	NA	0	0	NA	3.06	0.01	NA	0.289	0.193	NA
79850	2	39	4	5	1	1	157.927	84.3	33.8	105.5	0.803058	NA	NA	NA	NA	NA	NA	NA	NA	0	NA	NA	2	1	7	2	0	300	NA	0	0	0	1	0	0	0	0	0	0	NA	0	0	NA	2.09	0	NA	0.625	0	NA
79023	2	42	3	4	1	2	163.088	89.9	33.8	107.2	0.802983	NA	53	NA	195	1.8	3.1	219	6.9	1	NA	NA	2	1	3	1	0	420	NA	0	1	0	1	0	1	0	0	0	1	NA	0	0	NA	1.61	1.5	NA	0.92	2.364	NA
81186	2	42	3	4	3	1	177.174	106.1	33.8	111.1	0.79843	NA	57	NA	185	2.7	5.7	324	7.2	1	NA	NA	2	1	1	2	0	180	NA	0	0	0	0	0	0	0	0	0	NA	NA	0	0	NA	8.32	2.72	NA	4.789	0.948	NA
90588	2	35	1	2	1	1	152.688	78.8	33.8	102.8	0.795816	NA	56	NA	184	2.2	5.1	256	6.6	1	NA	NA	2	1	8	2	0	180	NA	0	0	0	0	0	0	0	0	0	NA	NA	11.2	0	NA	5.06	3.85	NA	2.983	3.342	NA
121714	2	27	4	1	3	1	165.071	92.1	33.8	104	0.774319	NA	54	NA	180	2.5	4	288	6.8	1	NA	NA	2	1	6	2	0	120	NA	0	0	0	0	0	0	0	0	0	NA	NA	0	0	NA	1.35	1.56	NA	1.601	2.028	NA
88361	2	36	5	3	3	1	163.45	90.3	33.8	102.8	0.76917	115	36	158	217	2.4	4.9	377	7.1	1	NA	NA	2	1	5	2	1	348	NA	3	0	3	3	3	0	0	0	0	0	NA	0	0	NA	20.45	14.44	NA	6.962	5.36	NA
120373	2	24	3	4	1	1	159.326	85.8	33.8	101.3	0.767696	201	39	145	224	2.1	8.5	299	6.8	1	NA	NA	2	1	1	2	0	180	NA	0	0	0	1	0	0	0	0	0	0	NA	0	0	NA	1.66	1.45	NA	1.186	1.249	NA
75664	2	31	4	3	3	1	162.269	89	33.8	99.6	0.747934	101	38	172	230	2.3	4.8	76	7.2	1	NA	NA	2	1	1	2	0	300	NA	0	0	3	0	3	3	2	0	0	1	NA	0	0	NA	1.21	3.53	NA	0.497	2.073	NA
92413	2	45	1	4	1	2	153.365	79.5	33.8	93.7	0.723768	434	56	NA	280	2.4	4.9	322	7.2	1	NA	NA	2	1	2	2	0	720	NA	0	0	0	0	0	0	0	0	0	NA	NA	0	0	NA	2.43	0.59	NA	3.46	3.46	NA
119693	2	37	5	3	2	1	170.616	98.1	33.7	115.2	0.845323	86	44	132	193	2.2	4.7	274	6.8	0	NA	NA	2	1	5	2	0	60	NA	1	2	2	2	2	2	2	2	1	2	NA	0	0	NA	2.51	0.26	NA	1.197	1.584	NA
117687	2	45	5	5	1	1	158.536	84.7	33.7	111	0.844967	NA	67	NA	217	3.2	7	412	7.7	1	NA	NA	3	1	2	2	1	420	NA	0	0	1	0	1	0	0	0	0	0	NA	0	0	NA	1.68	1.37	NA	1.948	2.015	NA
77830	2	43	2	2	1	1	151.941	77.8	33.7	107.2	0.833561	94	41	78	138	2.1	3.5	152	7.7	1	NA	NA	2	1	7	2	0	60	NA	0	0	0	1	0	0	0	0	0	0	NA	0	0	NA	3.01	0.08	NA	1.435	0.913	NA
121877	2	33	5	5	1	1	155.321	81.3	33.7	106.5	0.819058	NA	31	NA	138	2.4	3.5	235	7	1	NA	NA	2	1	2	1	1	480	NA	0	1	0	2	2	1	0	0	0	0	NA	0	0	NA	2.53	2.38	NA	2.14	2.504	NA
121486	2	35	4	4	3	1	160.396	86.7	33.7	107.1	0.810536	44	81	81	171	1.6	4.6	281	8	1	NA	NA	2	1	5	2	0	240	NA	0	2	3	1	3	1	0	3	0	0	NA	28.1	NA	NA	1	NA	NA	0.165	NA	NA
88607	2	21	3	4	1	1	148.484	74.3	33.7	102.6	0.807026	NA	77	NA	267	1.9	6.1	275	6.4	1	NA	NA	2	1	4	2	0	720	NA	0	0	0	0	0	0	0	0	0	NA	NA	0	0	NA	0.72	6.27	NA	1.567	2.479	NA
87482	2	29	1	4	1	1	153.978	79.9	33.7	104	0.803312	NA	45	NA	149	3.2	6.2	258	7.3	1	NA	NA	2	1	1	2	1	360	NA	0	0	0	0	0	0	0	0	0	NA	NA	0	11.2	NA	4.78	82.86	NA	3.61	2.099	NA
113792	2	25	2	2	3	3	152.623	78.5	33.7	101.3	0.785922	NA	30	NA	122	2.1	3.7	252	7	1	NA	NA	2	1	3	2	1	240	NA	0	0	0	1	1	0	0	0	0	0	NA	0	0	NA	2.84	2.42	NA	1.161	1.264	NA
75188	2	35	4	5	1	1	166.479	93.4	33.7	102.6	0.762164	38	48	107	163	2.8	3.4	278	7.4	1	NA	NA	2	1	4	2	0	600	NA	0	0	0	1	0	0	0	0	0	0	NA	0	0	NA	3.12	5.71	NA	1.475	2.071	NA
93459	2	44	2	1	1	1	155.512	81.5	33.7	98.9	0.760141	NA	66	NA	177	2.6	3	311	7	3	NA	NA	2	1	5	2	0	348	NA	0	0	0	0	1	0	0	0	0	0	NA	0	0	NA	1	0	NA	1.112	0.953	NA
121345	2	34	4	4	3	1	158.909	85.1	33.7	96.6	0.734484	43	54	139	202	3.2	4.2	280	6.8	1	NA	NA	2	1	1	2	0	120	NA	0	0	1	1	0	0	0	0	0	0	NA	0	0	NA	5.85	1.67	NA	1.543	0.801	NA
117038	2	30	4	5	1	1	169.306	96.6	33.7	95.4	0.702735	NA	48	NA	138	1.9	2.3	297	7.7	1	NA	NA	2	1	5	2	0	540	NA	0	1	2	2	0	0	1	0	0	0	NA	0	0	NA	2.12	1.73	NA	1.284	1.264	NA
92742	2	22	1	4	3	1	145.149	71	33.7	87.6	0.696911	NA	66	NA	166	3.1	5.4	348	7.2	1	NA	NA	2	1	2	2	0	300	NA	1	1	3	1	0	1	1	1	0	1	NA	0	0	NA	0.47	2.53	NA	0.856	0.901	NA
124631	2	28	3	3	1	1	180.69	109.7	33.6	119.4	0.853057	NA	39	NA	245	3.6	8.3	225	7	1	NA	NA	1	1	1	2	1	360	NA	0	1	2	2	0	0	1	0	0	1	NA	0	NA	NA	1.57	NA	NA	1.055	NA	NA
119158	2	44	5	4	1	1	160.82	86.9	33.6	112.5	0.851967	201	44	105	189	3.1	3.8	329	7	3	NA	NA	2	1	4	1	0	120	NA	0	0	0	1	0	0	0	0	0	0	NA	0	0	NA	9.61	8.54	NA	2.224	1.973	NA
115325	2	27	2	2	3	1	158.302	84.2	33.6	109.5	0.835817	NA	49	NA	166	2.6	4.7	352	7.5	3	NA	NA	2	1	4	2	0	180	NA	2	0	1	1	0	0	0	0	0	0	NA	0	0	NA	7.11	2.13	NA	1.528	0.44	NA
82684	2	42	2	4	3	1	167.261	94	33.6	111.5	0.827977	NA	76	NA	231	1.8	5.3	206	8	1	NA	NA	2	1	3	2	0	120	NA	0	0	0	1	0	0	0	0	0	0	NA	28	0	NA	1.8	5.25	NA	0.89	2.839	NA
80739	2	30	3	4	2	1	164.208	90.6	33.6	104.8	0.785425	95	39	82	140	2.9	2.8	229	6.8	1	NA	NA	2	1	2	2	1	120	NA	2	2	1	2	1	1	1	2	0	2	NA	NA	NA	NA	NA	NA	NA	NA	NA	NA
87427	2	22	2	4	2	1	166.011	92.6	33.6	103.9	0.774441	68	44	59	117	3.4	5.6	275	7.6	1	NA	NA	2	1	1	2	0	20	NA	0	1	2	1	2	0	1	1	0	1	NA	46.2	0	NA	3.44	7.39	NA	3.403	1.086	NA
109635	2	40	1	3	1	3	158.114	84	33.6	101.1	0.772159	84	54	92	163	2.9	3.1	229	7.5	1	NA	NA	2	1	3	2	0	120	NA	0	0	0	0	2	0	2	0	0	0	NA	0	0	NA	1.86	2.28	NA	0.933	0.784	NA
110427	2	28	5	4	2	1	164.389	90.8	33.6	103	0.771509	102	34	80	134	2.4	4.9	307	7.3	1	NA	NA	2	1	2	2	0	600	NA	1	0	1	1	0	0	0	0	0	0	NA	0	0	NA	5.05	6.23	NA	0.59	1.92	NA
90515	2	27	5	4	3	1	159.799	85.8	33.6	97.5	0.740727	NA	33	NA	152	2.8	4.5	219	7.4	3	NA	NA	2	1	1	2	0	300	NA	0	0	0	0	0	0	0	0	0	NA	NA	35	NA	NA	2.51	NA	NA	2.034	NA	NA
84033	2	41	5	4	3	1	163.39	89.7	33.6	96	0.721271	81	45	83	144	1.6	4.5	305	6.3	1	NA	NA	2	1	2	2	1	120	NA	0	0	1	1	0	0	0	3	0	1	NA	0	0	NA	3.84	28.45	NA	1.795	2.522	NA
90033	2	44	4	4	3	1	158.584	84.5	33.6	88	0.67111	NA	NA	NA	NA	NA	NA	NA	NA	1	NA	NA	2	1	5	1	0	360	NA	0	0	0	1	0	0	0	0	0	0	NA	0	0	NA	3.12	1.55	NA	0.491	1.125	NA
83711	2	38	3	3	1	1	156.358	81.9	33.5	112	0.86191	126	43	141	209	2	3.5	204	6.5	3	NA	NA	2	1	2	2	0	540	NA	0	0	0	0	0	0	0	0	0	NA	NA	0	0	NA	4.15	5.64	NA	1.413	1.687	NA
90069	2	40	4	5	3	2	166.258	92.6	33.5	113.8	0.849286	211	47	80	169	4.1	6.2	372	7	1	NA	NA	1	1	1	2	0	480	NA	1	0	1	1	1	0	0	0	0	0	NA	0	0	NA	1.45	4.19	NA	1.067	2.013	NA
117320	2	34	2	4	1	1	157.215	82.8	33.5	109	0.836534	NA	52	NA	187	4.1	8.4	315	6.8	1	NA	NA	2	1	1	2	1	420	NA	0	0	0	0	0	0	0	0	0	NA	NA	0	0	NA	12.71	3.4	NA	2.147	1.109	NA
111958	2	38	5	2	1	1	165.177	91.4	33.5	108.6	0.813126	142	35	161	224	2	5	280	6.6	0	NA	NA	2	1	1	2	0	900	NA	3	2	3	3	3	1	1	2	0	1	NA	0	0	NA	0.42	0.71	NA	0.065	0.116	NA
90061	2	45	2	3	2	1	162.168	88.1	33.5	105.7	0.798722	NA	62	NA	216	2	3.9	273	7.8	1	NA	NA	2	1	3	2	0	150	NA	1	0	0	1	0	0	0	0	0	0	NA	18.7	0	NA	2.08	0.89	NA	1.023	0.804	NA
110552	2	34	1	2	1	1	150.621	76	33.5	100	0.784082	161	46	91	169	2.4	3	338	7	1	NA	NA	2	1	4	2	0	720	NA	0	0	0	0	0	0	0	0	0	NA	NA	0	0	NA	4.22	1.88	NA	1.418	0.843	NA
86453	2	36	5	5	1	2	157.12	82.7	33.5	101.5	0.77921	NA	39	NA	196	1.6	3.2	210	6.9	1	NA	NA	2	1	2	1	0	180	NA	0	1	0	0	0	0	0	0	0	0	NA	0	0	NA	2.21	3.02	NA	0.604	1.392	NA
83933	2	31	3	2	1	1	164.634	90.8	33.5	102.2	0.766468	NA	45	NA	208	2.1	8.1	241	7.7	0	NA	NA	2	1	4	2	0	120	NA	0	0	0	3	0	3	0	0	0	0	NA	0	0	NA	1.87	1.33	NA	1.146	1.413	NA
119737	2	22	1	4	1	1	158.726	84.4	33.5	99.4	0.759216	NA	32	NA	140	2.3	5.1	269	6.5	1	NA	NA	2	1	2	2	0	600	NA	0	0	1	2	0	0	0	0	0	0	NA	0	0	NA	3.16	3.38	NA	2.015	1.436	NA
88986	2	22	2	5	3	1	153.856	79.3	33.5	97.7	0.757951	85	51	77	145	2.9	3.1	273	7.3	1	NA	NA	2	1	1	2	0	540	NA	1	2	1	2	1	2	0	1	0	1	NA	0	0	NA	2.8	1.47	NA	2.619	2.296	NA
88568	2	23	1	1	1	1	168.753	95.4	33.5	97	0.718537	23	45	105	155	2.1	3.1	275	7	1	NA	NA	2	1	2	2	0	300	NA	0	0	0	1	0	0	0	0	0	0	NA	0	0	NA	3.75	0.94	NA	1.464	1.001	NA
123120	2	43	4	4	2	1	168.488	95.1	33.5	96	0.71169	79	49	137	202	1.7	2.9	255	6.8	1	NA	NA	2	1	7	2	0	600	NA	0	1	0	1	0	0	0	0	0	0	NA	0	0	NA	3.36	6.19	NA	1.225	2.374	NA
119428	2	38	2	5	2	3	168.576	95.2	33.5	95.1	0.704833	NA	NA	NA	NA	NA	NA	NA	NA	1	NA	NA	2	1	6	2	0	360	NA	0	0	0	0	0	0	0	0	0	NA	NA	0	0	NA	0.72	0	NA	0.481	0.1	NA
124690	2	28	3	3	1	1	177.643	105.4	33.4	119.7	0.865944	NA	34	NA	200	2.8	4.6	280	7.9	0	NA	NA	2	1	3	2	0	480	NA	3	2	1	3	0	0	0	0	0	0	NA	0	NA	NA	3.2	NA	NA	1.408	NA	NA
78568	2	29	4	2	3	1	158.303	83.7	33.4	107.2	0.821522	64	43	120	176	2	5	234	7.2	1	NA	NA	2	1	3	2	0	480	NA	1	0	0	3	2	0	0	0	0	0	NA	0	20.2	NA	0.35	2.21	NA	0.978	1.097	NA
122906	2	26	3	3	3	1	150.647	75.8	33.4	103.5	0.813071	61	47	63	122	2.5	6.3	479	6.7	1	NA	NA	2	1	3	2	0	360	NA	0	0	0	1	0	0	0	0	0	0	NA	0	0	NA	13.86	8.93	NA	5.575	4.74	NA
111828	2	39	1	5	1	3	162.779	88.5	33.4	105	0.793522	NA	51	NA	204	2.5	4.7	273	7.2	1	NA	NA	2	1	3	2	0	180	NA	1	1	1	1	1	0	0	0	0	0	NA	0	0	NA	0.79	12.18	NA	0.594	2.806	NA
84291	2	36	4	3	1	1	154.958	80.2	33.4	101	0.782318	NA	NA	NA	NA	NA	NA	NA	NA	1	NA	NA	2	1	4	2	0	240	NA	1	0	0	1	0	0	0	0	0	0	NA	0	0	NA	4.33	1.72	NA	1.672	0.829	NA
78468	2	30	4	5	3	1	159.903	85.4	33.4	101	0.770127	NA	38	NA	187	3.3	5.8	262	7	1	NA	NA	2	1	2	2	0	600	NA	0	0	0	1	1	0	0	0	0	0	NA	0	0	NA	4.05	4.32	NA	1.661	1.656	NA
84880	2	44	4	5	1	1	170.68	97.3	33.4	101.1	0.746154	NA	61	NA	194	1.4	1.6	329	6.8	1	NA	NA	2	1	5	2	0	360	NA	1	1	1	1	0	1	0	1	0	0	NA	14	0	NA	3.9	0.29	NA	0.705	1.028	NA
124113	2	44	3	4	1	2	165.605	91.6	33.4	96.1	0.720038	NA	66	NA	211	2.7	4.7	157	7	1	NA	NA	2	1	3	2	0	540	NA	0	0	1	0	1	0	0	0	0	0	NA	0	0	NA	4.82	5.55	NA	2.782	2.385	NA
82369	2	37	4	3	3	1	164.153	90	33.4	94.4	0.710423	NA	48	NA	143	1.9	15.6	312	7.8	1	NA	NA	2	1	8	2	0	1200	NA	1	1	1	2	2	0	1	2	0	1	NA	42.1	0	NA	2.37	1.79	NA	2.013	1.171	NA
78631	2	28	5	3	3	1	165.854	91.6	33.3	111.6	0.837218	NA	37	NA	179	2.5	6.9	267	7.8	0	NA	NA	2	1	7	1	0	360	NA	3	0	0	0	0	0	0	0	0	0	NA	0	0	NA	2.98	0.18	NA	0.68	0.332	NA
84618	2	23	1	4	1	1	153.537	78.5	33.3	106.7	0.831946	59	56	120	188	2.9	4.4	159	6.8	0	NA	NA	2	1	2	1	0	900	NA	1	1	1	2	1	0	1	0	0	1	NA	0	0	NA	6.09	6.59	NA	3.449	2.243	NA
118286	2	45	2	3	1	1	168.28	94.3	33.3	111.1	0.827436	145	52	149	230	2.4	6.4	268	7.3	1	NA	NA	2	1	5	2	0	45	NA	3	3	3	3	3	2	3	1	0	2	NA	0	0	NA	4.01	3.53	NA	1.747	1.62	NA
112183	2	34	4	2	3	1	157.686	82.8	33.3	106.4	0.81862	NA	69	NA	156	2.1	5.9	266	7.3	1	NA	NA	2	1	5	2	0	180	NA	0	0	0	0	0	0	0	0	0	NA	NA	168.5	74.9	NA	3.84	4.26	NA	3.51	2.656	NA
76466	2	39	2	2	1	1	152.359	77.3	33.3	102.7	0.803848	NA	45	NA	193	3.1	4.6	290	7.3	3	NA	NA	2	1	4	2	0	120	NA	0	1	0	1	0	0	0	0	0	0	NA	0	0	NA	5.16	3.59	NA	0.817	0.704	NA
84006	2	45	4	2	1	1	159.767	85	33.3	104	0.794926	NA	38	NA	277	3.3	3.5	440	6.8	1	NA	NA	1	1	3	2	0	600	NA	1	1	1	1	0	0	0	0	0	0	NA	0	0	NA	5.45	2.25	NA	1.082	0.695	NA
114931	2	40	1	1	1	3	153.537	78.5	33.3	101.6	0.792181	244	39	76	164	1.4	3.9	224	7.2	1	NA	NA	2	1	3	2	0	120	NA	1	1	1	1	3	0	0	0	0	0	NA	0	0	NA	2.17	2.48	NA	1.917	1.589	NA
121063	2	42	2	4	3	1	158.635	83.8	33.3	100.3	0.769375	NA	59	NA	153	2.3	6.2	312	7.5	1	NA	NA	2	1	3	2	0	120	NA	1	1	1	1	1	0	1	0	0	1	NA	13	0	NA	5.93	1.4	NA	2.555	0.895	NA
114889	2	39	2	4	2	1	163.85	89.4	33.3	101.2	0.763826	149	34	109	173	2.4	2.3	283	7.8	1	NA	NA	2	1	4	2	0	420	NA	0	0	0	0	0	0	0	0	0	NA	NA	0	0	NA	0.39	2.72	NA	0.806	2.253	NA
91983	2	38	3	4	1	1	163.575	89.1	33.3	101	0.762957	NA	35	NA	173	2.9	8	342	7.6	1	NA	NA	2	1	4	2	0	360	NA	0	0	0	1	0	0	0	0	0	0	NA	0	0	NA	3.72	3.23	NA	0.95	0.984	NA
115450	2	26	5	4	1	1	148.162	73.1	33.3	94.2	0.747687	56	47	101	159	2.8	4.8	380	7.2	0	NA	NA	2	1	3	2	0	240	NA	0	0	0	1	0	1	0	0	0	0	NA	0	0	NA	9.92	0.21	NA	1.806	0.752	NA
124265	2	35	5	5	2	1	154.512	79.5	33.3	89.9	0.698741	67	68	165	246	1.6	3.6	316	7.8	1	NA	NA	2	1	3	2	0	480	NA	0	0	0	0	0	0	0	0	0	NA	NA	0	0	NA	1.24	0.67	NA	1.904	1.677	NA
114999	2	20	2	1	1	3	145.812	70.8	33.3	86.6	0.69288	NA	48	NA	155	3.8	9.5	360	6.3	0	NA	NA	2	1	1	2	0	120	NA	1	1	1	1	1	0	0	0	0	1	NA	0	NA	NA	4.2	NA	NA	1.71	NA	NA
124024	2	45	4	4	1	3	170.135	96.1	33.2	120	0.890621	75	54	158	227	1.1	2	173	7.2	1	NA	NA	2	1	2	2	0	60	NA	2	2	0	2	2	0	2	0	0	2	NA	0	0	NA	1.25	0.85	NA	1.31	0.589	NA
78129	2	39	3	3	1	1	165.831	91.3	33.2	115.2	0.866019	NA	76	NA	196	2.2	6.1	182	7.4	1	NA	NA	2	1	4	2	0	300	NA	0	0	3	1	1	0	0	0	0	0	NA	25.9	NA	NA	2.2	NA	NA	1.63	NA	NA
84046	2	45	3	5	1	2	165.012	90.4	33.2	114.5	0.862891	NA	59	NA	290	2.2	6.2	271	7	1	NA	NA	2	1	1	2	0	720	NA	0	0	0	1	0	0	0	0	0	0	NA	0	33.4	NA	7.71	7.58	NA	2.887	2.355	NA
87961	2	44	2	1	1	1	150.301	75	33.2	106.1	0.837804	NA	48	NA	180	2.1	3.9	166	7.4	0	NA	NA	2	1	3	1	0	60	NA	0	0	0	0	0	0	0	0	0	NA	NA	0	0	NA	2.24	3.69	NA	0.575	2.448	NA
77234	2	24	4	5	3	1	166.647	92.2	33.2	109.9	0.824152	NA	55	NA	198	2.1	3.1	323	6.6	1	NA	NA	2	1	1	2	0	720	NA	0	1	1	1	1	0	0	0	0	0	NA	14.4	0	NA	2	3.81	NA	1.471	1.653	NA
93206	2	44	2	4	1	1	152.489	77.2	33.2	101.2	0.793357	51	71	121	202	2	1.9	255	7.4	1	NA	NA	2	1	5	2	0	5	NA	0	1	0	1	0	0	0	0	0	0	NA	17.7	0	NA	7.99	2.22	NA	6.986	0.461	NA
85138	2	31	3	4	3	1	160.852	85.9	33.2	103.1	0.78696	NA	43	NA	186	2	5.6	177	6.8	1	NA	NA	2	1	1	1	0	420	NA	1	1	1	1	1	2	0	0	0	2	NA	10.5	14.1	NA	1.74	2.03	NA	1.106	1.153	NA
121149	2	43	2	2	1	1	167.997	93.7	33.2	105	0.784236	103	38	121	180	3	5.2	302	7.3	1	NA	NA	2	1	6	2	0	480	NA	0	1	0	1	0	0	0	0	0	0	NA	0	21.6	NA	0.77	2.55	NA	0.784	1.441	NA
120984	2	39	3	4	1	1	167.188	92.8	33.2	104.4	0.781639	227	32	136	213	2.6	5.5	276	7.6	1	NA	NA	2	1	3	2	0	600	NA	0	1	0	1	0	0	0	0	0	1	NA	0	0	NA	7.09	9.28	NA	1.894	2.584	NA
119635	2	38	1	3	1	3	153.474	78.2	33.2	99.9	0.78065	NA	48	NA	149	3.4	3.2	198	6.6	1	NA	NA	2	1	4	2	0	60	NA	0	0	0	0	0	0	0	0	0	NA	NA	NA	NA	NA	NA	NA	NA	NA	NA	NA
115801	2	45	1	2	3	1	150.501	75.2	33.2	98.6	0.778063	NA	47	NA	208	2	4.9	335	6.8	3	NA	NA	2	1	4	2	0	120	NA	0	0	3	2	1	0	0	1	0	0	NA	0	0	NA	3.46	104.08	NA	2.843	2.665	NA
81176	2	38	1	3	1	1	157.492	82.1	33.1	112.8	0.87189	NA	53	NA	145	3.8	4.7	300	7.3	3	NA	NA	2	1	5	2	0	240	NA	0	0	0	0	0	1	0	0	0	0	NA	0	0	NA	5.1	5.82	NA	1.272	2.425	NA
79084	2	42	1	2	1	3	167.26	92.6	33.1	114.9	0.861798	108	43	122	187	2.8	4.2	235	7.2	1	NA	NA	2	1	8	1	0	540	NA	0	1	1	1	0	0	0	0	0	1	NA	0	26.9	NA	7.23	2.97	NA	4.204	0.762	NA
117795	2	31	5	2	3	1	162.03	86.9	33.1	111	0.845875	NA	47	NA	190	3.1	9.2	320	7.1	1	NA	NA	2	1	3	2	0	300	NA	0	0	1	1	1	0	0	0	0	0	NA	0	0	NA	1.68	2.24	NA	0.58	1.464	NA
87147	2	20	5	2	1	1	158.924	83.6	33.1	108.9	0.837943	NA	77	NA	176	1.8	9.7	186	6.1	3	NA	NA	2	1	1	2	0	420	NA	0	0	1	2	0	0	0	0	0	0	NA	0	0	NA	9.88	3.98	NA	2.038	2.212	NA
119385	2	43	5	3	2	1	157.396	82	33.1	105.8	0.818032	NA	56	NA	216	1.6	3.5	317	7.3	1	NA	NA	2	1	5	2	1	600	NA	1	2	3	1	3	1	1	0	0	1	NA	0	0	NA	3.39	4.22	NA	1.376	1.746	NA
84171	2	30	3	4	1	2	156.433	81	33.1	105	0.814341	NA	37	NA	193	3.6	4.8	181	6.7	1	NA	NA	2	1	5	2	0	480	NA	0	0	0	0	0	0	0	0	0	NA	NA	0	0	NA	6.33	6.21	NA	2.577	2.448	NA
123391	2	40	2	5	1	2	157.108	81.7	33.1	101	0.781635	NA	63	NA	163	2.1	4.4	311	6.9	1	NA	NA	1	1	2	1	0	720	NA	0	0	1	1	0	0	0	0	0	0	NA	0	NA	NA	5.48	NA	NA	1.505	NA	NA
117485	2	20	2	4	3	1	175.113	101.5	33.1	106	0.777012	68	45	115	174	1.5	1.9	353	7.8	1	NA	NA	2	1	3	2	0	60	NA	0	2	3	3	3	3	2	0	2	2	NA	0	0	NA	5.07	1.94	NA	1.951	0.916	NA
109716	2	25	4	2	3	1	154.88	79.4	33.1	99.4	0.774764	NA	47	NA	145	3.1	3.6	476	7.5	1	NA	NA	2	1	7	2	0	300	NA	1	1	1	2	1	1	0	0	0	0	NA	0	0	NA	0.85	1.52	NA	0.303	1.614	NA
111963	2	20	1	4	1	1	158.066	82.7	33.1	99.9	0.770775	71	34	69	117	3.4	5.2	422	7.4	3	NA	NA	2	1	1	2	0	90	NA	0	0	0	2	0	0	0	0	0	0	NA	0	0	NA	1.95	4.63	NA	0.439	1.898	NA
124715	2	23	3	4	1	1	163.145	88.1	33.1	99.4	0.754885	49	80	97	187	3.5	4	259	6.6	1	NA	NA	2	1	2	2	0	120	NA	0	0	0	0	0	0	0	0	0	NA	NA	0	0	NA	3.5	2.9	NA	0.786	1.759	NA
111154	2	26	4	3	3	1	161.189	86	33.1	91.5	0.699093	NA	49	NA	151	2.7	3.4	317	6.7	1	NA	NA	2	1	2	2	0	120	NA	0	0	0	0	0	0	0	0	0	NA	NA	28.7	0	NA	0.9	0.51	NA	1.917	1.515	NA
110467	2	33	4	4	1	1	165.444	90.6	33.1	91.7	0.691553	34	76	63	146	1.8	1.5	202	7	1	NA	NA	2	1	2	2	0	300	NA	1	2	0	1	1	1	0	0	0	0	NA	0	0	NA	5.77	9.25	NA	2.339	4.163	NA
91234	2	39	2	4	1	1	155.505	79.8	33	112	0.872978	NA	44	NA	165	1.7	4.2	311	7.1	1	NA	NA	2	1	9	2	0	660	NA	0	0	1	3	3	1	0	0	0	1	NA	0	0	NA	3.12	5.29	NA	1.134	2.04	NA
116703	2	42	4	4	3	1	161.995	86.6	33	108.1	0.825529	135	54	123	204	2.5	2.2	327	6.8	1	NA	NA	2	1	4	2	0	660	NA	0	0	1	1	1	1	1	1	0	0	NA	18.5	NA	NA	5.34	NA	NA	0.938	NA	NA
88689	2	41	1	2	1	3	147.402	71.7	33	100.7	0.806187	NA	47	NA	121	2.4	4.7	499	7.4	3	NA	NA	1	1	4	2	0	420	NA	0	0	0	1	0	0	0	0	0	0	NA	0	NA	NA	5.23	NA	NA	1.993	NA	NA
117832	2	41	3	2	1	1	163.207	87.9	33	105	0.798873	177	49	120	204	2.1	5.9	323	6.9	1	NA	NA	2	1	4	2	0	540	NA	0	1	0	1	1	0	0	0	0	0	NA	0	0	NA	3.27	5.02	NA	2.202	1.865	NA
79153	2	29	1	4	3	1	162.835	87.5	33	104.8	0.798261	56	70	88	169	1.7	5.1	180	7.8	1	NA	NA	2	1	4	2	0	780	NA	2	1	0	1	0	0	0	0	0	0	NA	0	0	NA	15.44	2.71	NA	6.281	2.441	NA
114728	2	40	4	4	3	1	155.797	80.1	33	100.8	0.784943	NA	47	NA	141	3.5	6	415	6.8	1	NA	NA	2	1	3	2	0	480	NA	0	0	0	0	0	0	0	0	0	NA	NA	0	0	NA	0.59	0.47	NA	0.502	0.73	NA
114199	2	34	3	4	2	1	155.797	80.1	33	100.3	0.78105	NA	24	NA	213	3.6	4.4	386	7.3	1	NA	NA	2	1	4	2	1	120	NA	0	0	0	1	0	0	0	0	0	0	NA	0	0	NA	3.59	4.81	NA	1.546	2.314	NA
84490	2	28	1	4	1	1	151.688	75.7	32.9	113.2	0.895174	NA	44	NA	187	2.6	4.6	320	7.4	1	NA	NA	2	1	3	2	0	300	NA	0	0	2	1	0	0	0	0	0	0	NA	0	NA	NA	0.32	NA	NA	1.361	NA	NA
110789	2	36	1	2	1	1	154.271	78.3	32.9	104.9	0.822565	NA	39	NA	171	3.5	8.8	297	7.3	1	NA	NA	1	1	5	1	0	180	NA	0	0	0	0	0	0	0	0	0	NA	NA	0	0	NA	14.84	14.99	NA	2.784	3.457	NA
88879	2	32	4	3	3	1	171.884	97.2	32.9	108.4	0.805282	NA	95	NA	301	1.5	4	309	6.6	3	NA	NA	2	1	7	2	0	240	NA	0	0	0	0	0	0	0	0	0	NA	NA	0	0	NA	0.52	0.41	NA	0.657	0.525	NA
115944	2	43	4	4	2	1	165.579	90.2	32.9	106.3	0.804575	101	52	142	214	6	15.3	482	7.1	1	NA	NA	2	1	5	2	0	16	NA	2	1	2	2	2	0	3	1	0	2	NA	0	0	NA	1.67	1.46	NA	0.555	2.376	NA
85408	2	30	5	4	3	1	165.579	90.2	32.9	105.8	0.800791	NA	59	NA	129	2.9	3.4	306	6.4	1	NA	NA	2	1	2	2	0	240	NA	0	0	0	2	2	0	0	0	0	0	NA	0	0	NA	0.32	1.06	NA	1.936	1.724	NA
78008	2	33	4	5	3	1	163.826	88.3	32.9	104	0.791367	175	65	51	151	3.2	3.1	307	6.6	1	NA	NA	2	1	1	2	0	540	NA	0	0	0	1	0	0	0	0	0	0	NA	0	49.4	NA	1.62	3.63	NA	1.357	1.157	NA
121286	2	29	3	5	1	1	166.403	91.1	32.9	103.8	0.783705	NA	48	NA	185	2.3	5.3	250	7.2	1	NA	NA	2	1	1	2	0	780	NA	0	0	1	1	1	1	0	0	0	0	NA	0	0	NA	1.52	2.38	NA	0.426	0.918	NA
111608	2	34	4	3	3	3	158.258	82.4	32.9	99.9	0.773426	NA	45	NA	190	2.8	4.4	219	7.7	1	NA	NA	2	1	1	2	0	20	NA	0	0	0	0	0	0	0	0	0	NA	NA	0	0	NA	4.7	1.38	NA	1.268	0.64	NA
76751	2	36	1	2	1	1	151.988	76	32.9	96.1	0.759198	87	46	116	179	3.5	6.1	343	7.4	1	NA	NA	2	1	1	1	1	480	NA	1	1	0	1	1	0	0	0	0	0	NA	0	0	NA	9.63	5.08	NA	3.717	1.316	NA
85319	2	42	2	3	3	1	150.985	75	32.9	94	0.745071	NA	42	NA	172	2.4	4.3	278	7.5	1	NA	NA	2	1	4	2	0	240	NA	0	0	0	0	0	2	0	0	0	0	NA	0	0	NA	6.86	6.88	NA	2.269	1.308	NA
122578	2	22	1	4	3	1	159.787	84	32.9	95.7	0.737356	103	40	119	180	2.8	3.7	216	7.4	1	NA	NA	2	1	1	2	0	300	NA	0	0	0	0	0	0	0	0	0	NA	NA	0	0	NA	2.47	3.88	NA	1.505	1.754	NA
77007	2	45	3	4	1	1	168.295	92.9	32.8	118.4	0.890705	120	50	151	225	2.2	8.4	252	7.1	1	NA	NA	2	1	6	2	0	840	NA	0	0	0	1	0	0	0	0	0	0	NA	37.2	0	NA	2.11	0.36	NA	0.767	0.528	NA
122265	2	22	3	3	1	1	160.221	84.2	32.8	110.4	0.851191	37	51	53	111	1.3	3.8	283	6.7	1	NA	NA	2	1	2	2	0	180	NA	0	0	0	0	0	0	0	0	0	NA	NA	0	NA	NA	3.79	NA	NA	0.865	NA	NA
122319	2	31	4	2	1	1	173.029	98.2	32.8	114	0.845791	NA	36	NA	183	6	6.8	344	7.1	1	NA	NA	2	1	2	1	0	60	NA	0	0	0	0	0	0	0	0	0	NA	NA	0	0	NA	2	4.6	NA	0.308	2.99	NA
74731	2	27	1	4	1	1	160.506	84.5	32.8	109.3	0.841961	65	41	110	164	1.3	3.6	171	7.4	1	NA	NA	2	1	4	2	0	480	NA	0	0	0	0	0	0	0	0	0	NA	NA	0	NA	NA	5.46	NA	NA	1.095	NA	NA
90328	2	35	1	5	1	1	157.824	81.7	32.8	106.5	0.827332	NA	34	NA	251	2.9	4	278	8.1	0	NA	NA	2	1	6	1	0	180	NA	0	0	0	0	0	0	0	0	0	NA	NA	0	0	NA	2.6	0.13	NA	0.975	1.27	NA
83448	2	43	5	5	1	1	153.714	77.5	32.8	104.5	0.822577	71	64	82	160	2.4	5.9	374	7.3	1	NA	NA	2	1	2	1	0	480	NA	0	1	0	1	0	1	0	0	0	1	NA	0	0	NA	3.88	1.68	NA	1.415	1.466	NA
122513	2	28	4	4	3	1	155.685	79.5	32.8	102.6	0.802493	NA	61	NA	191	2.6	5.2	344	7.3	0	NA	NA	2	1	3	2	0	60	NA	0	1	0	1	1	0	0	1	0	0	NA	0	0	NA	6.54	2.57	NA	1.881	0.845	NA
123693	2	38	1	3	1	1	150.811	74.6	32.8	100.6	0.799464	NA	78	NA	215	3.1	7.5	306	7.4	3	NA	NA	2	1	2	2	0	300	NA	0	0	0	0	0	0	0	0	0	NA	NA	0	0	NA	1.24	0.26	NA	1.774	0.529	NA
84887	2	42	1	1	1	3	145.878	69.8	32.8	97	0.783779	NA	46	NA	190	4.4	6.1	309	7.3	1	NA	NA	2	1	3	2	0	360	NA	1	2	1	3	3	1	0	0	0	1	NA	0	0	NA	11.29	6.73	NA	2.15	3.009	NA
88451	2	34	1	1	1	1	154.801	78.6	32.8	99.5	0.780465	63	41	108	162	1.4	3.9	254	7.8	3	NA	NA	2	1	5	2	0	180	NA	0	1	0	1	0	0	0	0	0	0	NA	0	0	NA	8.3	1.78	NA	2.425	1.533	NA
116417	2	27	1	2	2	1	158.499	82.4	32.8	100.5	0.779059	NA	49	NA	185	3.6	5.8	342	7.8	1	NA	NA	2	1	1	2	0	360	NA	2	1	3	3	2	1	3	0	1	2	NA	0	0	NA	0.64	0.05	NA	0.96	0.699	NA
89854	2	37	1	5	1	1	158.114	82	32.8	99.2	0.769917	NA	47	NA	166	2.2	5.6	353	6.7	3	NA	NA	2	1	3	2	0	180	NA	0	0	0	0	0	0	0	3	0	0	NA	0	0	NA	2.38	14.37	NA	4.404	3.454	NA
86805	2	31	2	3	3	1	156.953	80.8	32.8	98.1	0.764191	NA	40	NA	145	2.7	5.6	239	6.7	1	NA	NA	2	1	4	2	0	180	NA	0	0	0	0	0	0	0	0	0	NA	NA	14.4	NA	NA	1.25	NA	NA	0.246	NA	NA
113023	2	38	5	5	1	3	155.489	79.3	32.8	97.6	0.763866	NA	43	NA	220	4.5	3.2	266	6.7	3	NA	NA	2	1	4	2	0	180	NA	0	0	0	0	0	0	0	0	0	NA	NA	0	0	NA	1.05	2.38	NA	1.281	1.648	NA
115780	2	41	4	4	2	1	159.553	83.5	32.8	96.3	0.74403	NA	58	NA	159	3.5	2.7	229	6.9	1	NA	NA	2	1	3	2	0	600	NA	0	1	0	1	1	0	0	0	0	0	NA	0	0	NA	0	0.49	NA	1.145	1.156	NA
124044	2	44	1	1	3	1	156.953	80.8	32.8	94.7	0.737706	NA	54	NA	234	2.1	5.1	375	7.6	1	NA	NA	2	1	4	2	0	348	NA	0	0	0	0	0	0	0	0	0	NA	NA	22.3	0	NA	3.62	2.48	NA	2.202	1.83	NA
109541	2	35	4	4	3	1	164.419	88.4	32.7	114.9	0.876285	69	42	135	191	1.8	2.3	361	7	1	NA	NA	2	1	4	2	0	300	NA	0	1	0	1	2	0	0	0	0	0	NA	0	0	NA	5.07	3.99	NA	2.394	2.577	NA
119841	2	45	3	4	2	1	152.552	76.1	32.7	109.5	0.866975	NA	62	NA	187	1.7	4	229	6.5	1	NA	NA	1	1	3	2	0	240	NA	0	1	0	3	0	0	0	0	0	0	NA	29.6	0	NA	3.4	0.42	NA	1.089	0.171	NA
90640	2	41	3	4	3	1	163.018	86.9	32.7	111.9	0.857065	NA	52	NA	132	3.2	5.4	193	7.2	1	NA	NA	2	1	4	2	0	720	NA	0	0	0	0	0	0	0	0	0	NA	NA	0	22.3	NA	7.8	1.77	NA	3.317	0.815	NA
86167	2	36	1	4	1	2	160.561	84.3	32.7	107.8	0.831956	152	52	126	208	3.6	2.9	303	7.4	1	NA	NA	1	1	3	2	1	180	NA	0	0	0	0	0	0	0	0	0	NA	NA	0	0	NA	2.43	1.62	NA	0.569	1.557	NA
110711	2	40	1	4	1	2	157.387	81	32.7	101.8	0.793533	NA	79	NA	264	2.6	2.9	237	7.5	0	NA	NA	2	1	4	1	1	600	NA	0	0	0	0	0	0	0	0	0	NA	NA	0	0	NA	0.95	1.57	NA	0.698	2.18	NA
110824	2	37	4	2	3	1	149.617	73.2	32.7	99.1	0.79229	NA	62	NA	173	1.4	7	335	6.6	1	NA	NA	2	1	3	2	0	240	NA	1	1	1	1	0	1	0	0	0	0	NA	0	0	NA	3.37	0.33	NA	1.149	0.3	NA
121429	2	39	4	2	1	1	167.734	92	32.7	102.5	0.773954	34	76	114	197	2.8	5.3	273	8.5	1	NA	NA	2	1	6	2	0	240	NA	1	0	0	1	0	0	0	1	0	0	NA	0	0	NA	11.52	4.7	NA	1.418	3.504	NA
113947	2	31	4	4	3	1	158.645	82.3	32.7	93.2	0.72361	NA	55	NA	160	2.7	2.3	424	7.1	1	NA	NA	2	1	3	2	0	240	NA	0	0	0	0	0	0	0	0	0	NA	NA	0	NA	NA	3.31	NA	NA	3.146	NA	NA
74725	2	37	1	4	1	1	166.891	90.8	32.6	106.4	0.807073	NA	49	NA	207	2.7	5.2	230	6.6	1	NA	NA	2	1	5	2	0	540	NA	0	0	0	0	0	0	2	0	0	0	NA	NA	NA	NA	NA	NA	NA	NA	NA	NA
76552	2	31	1	4	1	1	162.42	86	32.6	104.5	0.803497	NA	NA	NA	NA	NA	NA	NA	NA	0	NA	NA	2	1	5	2	0	120	NA	0	0	1	0	0	0	0	0	0	0	NA	0	0	NA	3.13	3.59	NA	1.483	2.023	NA
124574	2	37	1	1	1	1	144.214	67.8	32.6	97.4	0.794775	111	52	113	187	2.4	5.9	245	7.6	1	NA	NA	2	1	2	2	0	180	NA	0	0	0	0	0	0	0	0	0	NA	NA	0	0	NA	8.09	1.82	NA	2.034	0.932	NA
92695	2	21	4	4	3	1	167.899	91.9	32.6	104.4	0.789522	NA	55	NA	202	2.1	4.3	257	6.9	1	NA	NA	2	1	2	2	0	300	NA	3	2	2	2	3	0	0	0	0	1	NA	NA	NA	NA	NA	NA	NA	NA	NA	NA
84285	2	44	5	4	1	1	162.609	86.2	32.6	102.1	0.784588	93	41	163	223	2	7.9	254	6.5	1	NA	NA	1	1	6	1	0	120	NA	0	0	1	3	3	0	3	3	0	0	NA	0	0	NA	4.08	6.34	NA	1.876	1.716	NA
114808	2	39	3	5	1	1	170.887	95.2	32.6	104.6	0.784089	43	60	105	174	1.9	4.6	274	7.1	1	NA	NA	2	1	4	2	0	360	NA	0	0	0	0	0	1	0	0	0	0	NA	29.9	0	NA	5.07	2.77	NA	3.101	2.233	NA
85073	2	41	1	1	3	1	169.987	94.2	32.6	104	0.781652	NA	35	NA	163	2	4.8	331	6.6	3	NA	NA	2	1	4	2	0	360	NA	0	0	0	1	0	0	0	0	0	0	NA	0	0	NA	5.31	6.84	NA	3.258	2.529	NA
88621	2	40	1	4	3	1	160.807	84.3	32.6	100.4	0.775835	NA	NA	NA	NA	1.9	4.1	276	NA	3	NA	NA	2	1	3	2	0	120	NA	0	0	0	1	0	0	0	0	0	0	NA	0	0	NA	1.38	1.34	NA	1.234	1.797	NA
75706	2	44	4	4	3	1	163.268	86.9	32.6	100.3	0.769199	93	50	106	175	1.8	2.8	266	7.2	1	NA	NA	2	1	2	2	0	720	NA	0	0	1	1	0	0	0	0	0	0	NA	0	0	NA	4.96	0.65	NA	1.617	1.896	NA
122236	2	29	5	5	1	3	151.475	74.8	32.6	93.6	0.745235	NA	NA	NA	NA	NA	NA	NA	NA	1	NA	NA	2	1	4	2	0	240	NA	0	0	0	0	0	0	0	0	0	NA	NA	0	11.5	NA	5.01	2.94	NA	2.122	1.903	NA
81316	2	43	3	3	1	1	174.088	98.8	32.6	99.8	0.741198	81	55	137	208	2.3	4.3	329	6.8	1	NA	NA	2	1	6	2	0	480	NA	0	0	1	1	0	0	0	0	0	0	NA	0	0	NA	20.77	2.17	NA	10.202	1.091	NA
84229	2	43	4	1	3	1	159.615	82.8	32.5	120.2	0.934212	61	71	180	263	1.4	1.7	266	7.1	1	NA	NA	2	1	5	2	0	420	NA	3	1	1	1	2	0	1	1	0	1	NA	0	0	NA	2.33	8.78	NA	1.884	2.45	NA
121758	2	30	3	4	3	1	167.883	91.6	32.5	117.6	0.891214	NA	34	NA	169	3.2	6.8	308	6.5	1	NA	NA	2	1	1	2	1	300	NA	0	0	2	0	1	0	0	0	0	0	NA	0	0	NA	3.72	4.72	NA	3.549	4.463	NA
115300	2	42	2	3	1	1	152.214	75.3	32.5	105.2	0.83727	NA	60	NA	171	1.9	4.8	354	7.1	3	NA	NA	2	1	4	2	0	600	NA	0	0	0	0	0	0	0	0	0	NA	NA	NA	NA	NA	NA	NA	NA	NA	NA	NA
76719	2	39	4	3	1	1	170.79	94.8	32.5	111.3	0.836261	57	49	108	168	2.3	4	274	6.6	1	NA	NA	2	1	8	2	1	600	NA	0	0	0	0	0	0	0	0	0	NA	NA	14	0	NA	3.17	3.51	NA	1.888	1.451	NA
88081	2	36	4	5	1	1	154.522	77.6	32.5	105.6	0.834156	NA	25	NA	200	1.7	3.7	325	7.7	1	NA	NA	2	1	3	2	0	1020	NA	1	1	1	1	0	1	0	0	0	0	NA	14	19.2	NA	4	0.45	NA	1.357	0.621	NA
78305	2	43	3	3	3	1	165.204	88.7	32.5	108.8	0.831183	68	52	117	183	1.7	9.3	313	7	1	NA	NA	2	1	1	2	0	660	NA	0	1	1	1	0	0	0	0	0	0	NA	0	0	NA	4.65	1.36	NA	1.39	1.393	NA
124092	2	38	3	4	1	3	165.297	88.8	32.5	108.6	0.829421	NA	47	NA	197	3.9	5.4	290	6.8	1	NA	NA	2	1	1	2	0	600	NA	0	0	0	1	0	0	0	0	0	0	NA	0	0	NA	2.8	1.79	NA	1.609	0.892	NA
122883	2	44	1	1	1	1	156.5	79.6	32.5	103.8	0.814737	NA	48	NA	182	2.1	4.3	199	7.3	3	NA	NA	2	1	5	2	0	120	NA	2	2	2	3	3	3	3	3	0	1	NA	0	0	NA	9.2	4.42	NA	3.061	1.778	NA
116164	2	33	5	3	3	1	167.791	91.5	32.5	106.2	0.805041	123	50	127	202	2.9	7.1	298	7.3	1	NA	NA	2	1	3	2	0	360	NA	0	0	1	2	0	0	0	0	0	0	NA	0	0	NA	2.31	7.22	NA	0.76	4.037	NA
112877	2	37	4	3	1	1	171.509	95.6	32.5	103.2	0.773773	NA	63	NA	161	3.1	5.5	367	7.6	1	NA	NA	2	1	4	2	0	240	NA	0	0	0	0	3	0	0	0	0	0	NA	0	0	NA	8.77	4.88	NA	3.083	2.037	NA
77339	2	41	5	4	1	1	158.939	82.1	32.5	96.8	0.753942	NA	41	NA	348	2.3	2.6	370	7.7	1	NA	NA	2	1	3	2	0	840	NA	2	1	3	1	2	0	0	0	0	1	NA	22.3	12.7	NA	3.23	2	NA	2.065	3.49	NA
78967	2	41	2	4	3	2	162.575	85.9	32.5	94.8	0.73006	56	58	108	177	2.2	3.6	249	6.3	1	NA	NA	2	1	3	2	1	600	NA	0	0	0	0	0	0	0	0	0	NA	NA	18.5	NA	NA	3.18	NA	NA	1.519	NA	NA
75919	2	23	3	4	1	1	162.066	85.1	32.4	112.7	0.871059	NA	77	NA	282	2.2	8.9	214	6	1	NA	NA	2	1	5	2	0	180	NA	0	0	1	2	0	0	0	0	0	1	NA	0	0	NA	4.02	2.75	NA	2.832	0.611	NA
82319	2	35	1	4	3	1	157.919	80.8	32.4	105.6	0.826832	NA	NA	NA	NA	NA	NA	NA	NA	1	NA	NA	2	1	4	1	0	720	NA	1	1	1	1	0	0	0	0	0	1	NA	0	0	NA	3.34	22.07	NA	1.792	7.697	NA
124183	2	33	2	1	1	3	156.446	79.3	32.4	102.8	0.808688	99	39	92	151	2.2	2.7	235	7	1	NA	NA	3	1	6	2	0	240	NA	1	2	3	1	3	3	2	1	0	1	NA	0	0	NA	1.74	2.19	NA	1.563	0.84	NA
82057	2	36	4	4	3	1	168.783	92.3	32.4	105.7	0.800536	NA	53	NA	147	2	3.1	220	7.3	1	NA	NA	2	1	2	2	1	300	NA	0	0	3	3	0	0	0	0	0	0	NA	0	0	NA	4.65	0.79	NA	2.767	2.065	NA
121242	2	41	4	4	3	1	163.583	86.7	32.4	102.7	0.790082	NA	44	NA	208	2.3	1.4	292	7.3	1	NA	NA	2	1	1	2	0	480	NA	0	0	2	0	0	0	0	0	0	0	NA	NA	NA	NA	NA	NA	NA	NA	NA	NA
84394	2	45	2	2	1	1	159.378	82.3	32.4	98.9	0.770819	NA	70	NA	191	2.5	4.5	224	7.1	1	NA	NA	2	1	7	1	0	300	NA	2	1	0	1	1	1	0	1	0	0	NA	0	0	NA	0.73	3.16	NA	0.962	1.304	NA
89278	2	25	3	3	1	2	158.406	81.3	32.4	96.5	0.754416	NA	50	NA	140	2.4	5.4	283	7.6	1	NA	NA	2	1	3	2	1	180	NA	0	0	2	2	1	0	0	0	0	0	NA	0	NA	NA	2.72	NA	NA	1.225	NA	NA
118370	2	43	3	3	3	1	176.13	100.2	32.3	123.2	0.915291	125	32	73	130	2.6	4.9	301	7.6	1	NA	NA	2	1	2	2	0	720	NA	0	0	0	0	0	0	0	0	0	NA	NA	0	0	NA	2.01	0.19	NA	0.998	0.154	NA
89813	2	40	3	4	1	1	152.584	75.2	32.3	109.2	0.871633	188	36	170	244	1.8	4.3	307	7.3	1	NA	NA	1	1	5	1	1	360	NA	0	1	1	2	1	0	0	0	0	0	NA	0	15.5	NA	4.55	1.92	NA	0.975	0.988	NA
73668	2	30	3	4	3	1	160.398	83.1	32.3	108.8	0.847021	90	49	93	160	1.9	4.4	225	7.1	1	NA	NA	2	1	8	1	0	360	NA	0	0	0	1	0	0	0	0	0	0	NA	0	0	NA	1.02	3.56	NA	1.358	1.311	NA
83150	2	43	2	2	3	1	152.38	75	32.3	105.8	0.845057	NA	32	NA	186	3	4.2	276	7.3	1	NA	NA	2	1	7	2	0	480	NA	3	3	3	3	0	3	1	1	1	3	NA	7.4	NA	NA	6	NA	NA	1.174	NA	NA
123959	2	27	1	4	1	1	160.302	83	32.3	108	0.841046	116	44	119	186	2	3.8	235	7.4	1	NA	NA	2	1	1	2	1	180	NA	0	0	0	2	0	0	0	0	0	0	NA	0	NA	NA	2.67	NA	NA	0.421	NA	NA
87905	2	42	1	2	3	1	149.405	72.1	32.3	102.4	0.826003	93	31	80	130	2.4	4.9	258	6.6	1	NA	NA	3	1	4	1	0	240	NA	0	0	0	1	0	0	0	2	0	0	NA	0	NA	NA	0.48	NA	NA	0.26	NA	NA
79181	2	34	3	5	2	1	155.796	78.4	32.3	104.4	0.824683	117	49	134	206	2.5	4.2	193	7.3	1	NA	NA	2	1	2	1	0	240	NA	0	1	0	0	1	0	0	0	0	0	NA	0	0	NA	4.3	1.57	NA	1.693	0.528	NA
120837	2	38	1	5	1	3	170.775	94.2	32.3	108.8	0.820884	58	34	94	140	2.1	4.9	283	6.7	1	NA	NA	1	1	3	1	0	360	NA	0	0	1	1	1	0	0	0	0	0	NA	37.4	71.8	NA	6.2	7.26	NA	1.835	2.507	NA
83140	2	44	5	1	1	1	144.454	67.4	32.3	99.8	0.818712	NA	44	NA	149	2.4	5.7	288	7.6	1	NA	NA	2	1	3	2	0	240	NA	0	0	0	0	0	0	0	0	0	NA	NA	NA	NA	NA	NA	NA	NA	NA	NA	NA
92642	2	34	3	4	1	1	164.024	86.9	32.3	104.4	0.803732	NA	53	NA	181	2.9	3.4	286	6.9	1	NA	NA	2	1	2	2	1	180	NA	0	0	0	0	0	0	0	0	0	NA	NA	0	0	NA	4.06	2.86	NA	1.2	0.797	NA
78884	2	26	2	2	1	1	157.083	79.7	32.3	100.7	0.792192	198	36	108	184	3	7.9	321	7.7	3	NA	NA	2	1	1	2	0	60	NA	0	1	0	1	0	0	0	0	0	0	NA	0	NA	NA	11.27	NA	NA	3.798	NA	NA
119234	2	41	3	4	1	1	155.597	78.2	32.3	97.5	0.77067	NA	NA	NA	NA	NA	NA	NA	NA	1	NA	NA	2	1	4	2	0	360	NA	1	1	3	2	0	1	0	0	1	1	NA	56.1	0	NA	3.58	3.56	NA	2.346	1.486	NA
84072	2	27	2	4	1	1	164.024	86.9	32.3	99.5	0.766009	124	81	61	167	2.2	7.1	288	5.9	1	NA	NA	2	1	3	2	0	660	NA	0	0	1	1	0	0	0	0	0	0	NA	0	0	NA	1.46	4.81	NA	0.687	1.369	NA
82079	2	29	4	5	3	1	165.901	88.9	32.3	98.4	0.753243	NA	NA	NA	NA	2.7	4	312	NA	3	NA	NA	2	1	1	2	0	300	NA	0	2	2	1	2	0	0	0	0	0	NA	0	0	NA	3.45	0.1	NA	1.588	0.023	NA
121924	2	29	4	4	3	1	163.741	86.6	32.3	87.6	0.674979	52	64	63	137	1.3	4.6	212	7	1	NA	NA	2	1	2	2	0	348	NA	3	0	0	3	2	0	0	0	0	0	NA	0	0	NA	0.77	6.13	NA	1.228	4.917	NA
84305	2	36	1	3	3	1	153.125	75.5	32.2	110.7	0.883868	NA	56	NA	212	NA	NA	NA	7.2	1	NA	NA	2	1	2	2	0	120	NA	1	0	0	0	0	1	0	0	0	0	NA	0	NA	NA	3.67	NA	NA	0.971	NA	NA
82338	2	31	3	5	1	1	162.76	85.3	32.2	111.8	0.865827	144	47	164	240	2.5	4.2	258	6.9	0	NA	NA	2	1	2	2	1	240	NA	1	0	1	1	1	0	0	0	0	0	NA	0	0	NA	1.38	1.08	NA	0.463	1.86	NA
90461	2	37	4	4	1	3	174.456	98	32.2	112	0.837796	80	74	104	194	1.7	3	214	6.8	1	NA	NA	2	1	3	2	0	30	NA	1	1	3	3	0	1	0	0	0	0	NA	0	0	NA	2.75	13.08	NA	1.626	5.475	NA
123186	2	28	2	4	2	1	152.617	75	32.2	102.8	0.822157	NA	62	NA	209	2.1	4.2	259	7.5	1	NA	NA	2	1	5	2	0	180	NA	0	0	0	0	1	0	0	0	0	0	NA	0	0	NA	1.13	1.03	NA	0.54	0.816	NA
75888	2	44	3	4	3	1	162.09	84.6	32.2	101.3	0.786129	123	46	146	217	1.6	4.3	206	6.9	1	NA	NA	3	1	2	1	0	480	NA	0	0	3	3	3	0	3	0	0	0	NA	0	0	NA	6.05	7.48	NA	0.92	1.059	NA
113658	2	37	1	2	1	3	152.922	75.3	32.2	97.2	0.776594	106	58	171	250	2.6	4.9	238	7.4	1	NA	NA	1	1	2	2	1	75	NA	1	1	3	1	0	0	1	0	0	1	NA	0	0	NA	12.65	5.65	NA	3.628	1.383	NA
123354	2	34	4	3	3	3	166.159	88.9	32.2	97.1	0.744253	NA	62	NA	115	1.5	1.8	283	6.8	1	NA	NA	2	1	1	2	0	300	NA	0	0	0	0	0	0	0	0	0	NA	NA	0	39.5	NA	2.27	0.77	NA	1.266	0.721	NA
121581	2	27	2	4	3	1	168.387	91.3	32.2	97.4	0.741597	NA	59	NA	159	3.1	3.7	309	7.5	1	NA	NA	2	1	1	2	0	480	NA	0	0	0	1	0	0	0	0	0	0	NA	0	0	NA	2.15	2.82	NA	0.891	5.238	NA
90260	2	45	4	5	3	2	173.832	97.3	32.2	97.4	0.72989	NA	59	NA	218	2.5	3.6	289	7.4	1	NA	NA	2	1	1	2	0	540	NA	0	0	3	0	0	0	0	0	0	0	NA	12.7	0	NA	5.6	1.87	NA	1.095	0.66	NA
79808	2	33	4	3	3	1	165.127	87.8	32.2	94.9	0.729658	NA	52	NA	169	3.5	4.9	262	7.4	1	NA	NA	2	1	4	2	0	480	NA	0	0	1	0	1	0	1	0	0	0	NA	0	0	NA	4.57	0.4	NA	1.071	2.842	NA
122701	2	27	4	4	3	1	162.055	84.3	32.1	112.8	0.877287	130	84	50	160	3.2	8.9	195	6.3	1	NA	NA	2	1	6	2	1	720	NA	0	0	0	0	0	0	1	1	0	0	NA	0	0	NA	2.07	3.68	NA	0.499	1.555	NA
91596	2	42	4	3	2	1	160.121	82.3	32.1	110.2	0.862226	68	83	97	194	2.1	2.3	221	6.3	0	NA	NA	2	1	6	2	0	420	NA	0	0	1	1	0	0	0	0	0	0	NA	0	0	NA	2.95	7	NA	1.712	2.855	NA
77428	2	33	4	2	3	1	158.655	80.8	32.1	108.4	0.852052	NA	62	NA	190	2.3	7.7	310	6.9	1	NA	NA	2	1	4	2	0	240	NA	0	1	1	0	0	0	0	0	0	0	NA	NA	NA	NA	NA	NA	NA	NA	NA	NA
87664	2	34	3	4	3	1	171.306	94.2	32.1	111.9	0.846461	NA	84	NA	200	3.2	5.6	236	7.3	1	NA	NA	2	1	2	2	0	600	NA	0	0	0	0	0	0	0	0	0	NA	NA	0	0	NA	2.29	6.18	NA	0.936	1.861	NA
87892	2	29	4	4	3	1	162.917	85.2	32.1	108.5	0.841607	83	60	79	156	3.4	1.1	242	6	1	NA	NA	2	1	8	2	1	480	NA	1	1	1	1	2	0	0	0	0	0	NA	46.2	NA	NA	5.87	NA	NA	3.326	NA	NA
119896	2	43	4	5	2	1	162.247	84.5	32.1	106.5	0.827799	130	151	87	264	1.9	0.9	155	6.6	1	NA	NA	2	1	6	2	0	360	NA	0	0	1	1	1	0	1	0	0	1	NA	23.4	0	NA	0.25	4.43	NA	1.121	2.149	NA
87090	2	34	2	3	1	1	164.818	87.2	32.1	106.3	0.819773	98	54	106	180	1.8	3.4	245	7.3	1	NA	NA	2	1	2	2	0	300	NA	0	0	0	0	0	0	0	0	0	NA	NA	0	0	NA	5.02	2.18	NA	0.905	1.312	NA
120239	2	23	4	3	3	1	148.303	70.6	32.1	97	0.788606	58	29	120	161	2.3	3.3	396	7.3	1	NA	NA	2	1	1	2	0	120	NA	0	1	0	0	0	0	0	0	0	0	NA	0	0	NA	3.39	5.25	NA	1.14	2.077	NA
110319	2	34	1	4	1	1	166.511	89	32.1	101.4	0.778001	57	48	87	146	1.6	3.1	237	6.8	1	NA	NA	2	1	4	2	0	420	NA	0	0	0	0	0	0	0	0	0	NA	NA	0	0	NA	1.12	12.59	NA	1.658	6.021	NA
111320	2	43	3	1	1	1	170.752	93.3	32	110.4	0.83821	NA	45	NA	191	1	3	275	7.5	1	NA	NA	1	1	5	2	0	240	NA	1	1	1	1	1	1	1	0	0	1	NA	0	0	NA	3.65	1.14	NA	0.807	0.755	NA
80694	2	34	3	3	1	1	164.507	86.6	32	108	0.835408	NA	40	NA	206	2.3	6.6	206	7.1	0	NA	NA	2	1	4	2	0	420	NA	2	0	3	2	0	0	0	0	0	0	NA	0	0	NA	3.23	0.92	NA	0.599	0.276	NA
116336	2	40	3	3	1	1	155.724	77.6	32	104.8	0.833201	NA	42	NA	232	4.9	8.1	271	6.6	1	NA	NA	2	1	7	2	1	480	NA	1	0	3	3	3	0	0	0	0	1	NA	0	0	NA	4.57	1.86	NA	1.021	0.517	NA
121162	2	42	3	4	3	1	167.332	89.6	32	108.4	0.831393	NA	72	NA	170	1.7	7.8	180	7	1	NA	NA	2	1	3	2	0	420	NA	0	0	0	1	1	0	1	0	0	0	NA	0	42.1	NA	2.52	9.38	NA	1.847	2.923	NA
91144	2	30	1	4	3	1	159.393	81.3	32	102.5	0.805481	43	56	80	145	1.5	3.5	232	7	1	NA	NA	2	1	4	2	0	120	NA	0	0	1	1	1	0	0	0	0	0	NA	0	NA	NA	0.79	NA	NA	0.644	NA	NA
90454	2	20	3	3	1	1	169.742	92.2	32	105.3	0.801862	NA	37	NA	141	2	4	231	7.1	3	NA	NA	2	1	3	2	0	840	NA	0	0	0	1	1	0	0	0	0	0	NA	0	NA	NA	2.76	NA	NA	0.795	NA	NA
80805	2	37	3	5	3	1	170.66	93.2	32	105.5	0.801222	143	59	131	219	1.3	2.8	248	7.5	1	NA	NA	2	1	1	2	0	360	NA	0	1	0	0	0	0	0	0	0	1	NA	223.2	NA	NA	2.64	NA	NA	3.571	NA	NA
112869	2	24	3	4	1	1	164.602	86.7	32	102.3	0.791088	106	51	143	215	1.8	3.4	267	7.7	3	NA	NA	2	1	1	2	0	240	NA	0	0	0	0	0	0	0	0	0	NA	NA	0	0	NA	4.09	4.04	NA	1.596	2.033	NA
121488	2	26	4	4	3	1	159.197	81.1	32	100.5	0.790251	51	48	102	160	1.9	3.6	250	6.8	1	NA	NA	2	1	3	2	0	1020	NA	0	0	0	1	0	0	0	0	0	0	NA	0	0	NA	0.71	1.62	NA	0.573	0.377	NA
74745	2	33	1	2	3	1	158.213	80.1	32	96.6	0.761944	NA	43	NA	218	2.1	5.7	235	6.9	1	NA	NA	2	1	2	2	0	660	NA	0	0	0	0	0	0	0	0	0	NA	NA	NA	NA	NA	NA	NA	NA	NA	NA	NA
73931	2	37	1	2	1	1	146.735	68.9	32	91	0.745317	83	42	95	154	2.3	1.6	299	6.6	3	NA	NA	2	1	3	2	0	480	NA	0	0	1	1	1	0	0	0	0	0	NA	0	0	NA	5.92	3.52	NA	2.324	1.49	NA
112239	2	38	4	3	3	1	161.922	83.9	32	95.5	0.74459	NA	79	NA	198	2.7	3.2	316	6.9	1	NA	NA	2	1	5	2	0	180	NA	0	0	0	0	0	0	0	0	0	NA	NA	0	0	NA	0.19	1.93	NA	0.08	2.37	NA
74642	2	45	4	3	3	1	170.477	93	32	97.8	0.743143	NA	63	NA	199	1.2	5.2	288	8	3	NA	NA	2	1	6	2	0	480	NA	0	0	0	0	0	0	0	0	0	NA	NA	0	0	NA	3.01	5.6	NA	0.864	1.291	NA
86249	2	24	5	1	2	1	170.469	92.7	31.9	122.5	0.932796	NA	41	NA	109	2.3	5.8	333	6.6	1	NA	NA	2	1	3	2	0	180	NA	0	0	0	0	0	0	0	0	0	NA	NA	0	0	NA	3.37	0	NA	0.98	0.019	NA
93483	2	42	3	4	1	1	169.084	91.2	31.9	110.8	0.847153	NA	41	NA	134	1.6	3.5	234	7.1	1	NA	NA	2	1	5	2	0	240	NA	0	0	3	2	0	0	0	0	0	0	NA	0	0	NA	13.65	5.71	NA	4.868	2.527	NA
117379	2	41	4	4	3	1	161.692	83.4	31.9	106.2	0.830335	NA	83	NA	196	2.5	3.7	253	7	1	NA	NA	2	1	5	2	1	300	NA	2	2	1	1	2	1	2	2	0	1	NA	83.5	161.7	NA	2.54	4.46	NA	1.903	3.691	NA
75928	2	31	3	5	1	2	168.713	90.8	31.9	107.8	0.825121	117	40	124	187	2.1	7.6	312	7.3	1	NA	NA	3	1	1	2	0	660	NA	0	0	1	1	0	0	0	0	0	0	NA	0	0	NA	13.65	1.22	NA	3.021	0.982	NA
76792	2	38	5	3	1	1	156.57	78.2	31.9	103.2	0.819971	582	27	NA	177	2.5	8.3	344	7.6	0	NA	NA	1	1	9	1	0	840	NA	0	0	1	3	2	1	0	1	0	3	NA	0	0	NA	0.8	1.9	NA	0.698	1.564	NA
84073	2	39	2	3	3	1	158.559	80.2	31.9	103.1	0.814021	147	40	78	147	2.4	6.7	218	6.9	1	NA	NA	2	1	2	2	0	120	NA	0	0	0	0	0	0	0	0	0	NA	NA	0	0	NA	4.32	5.01	NA	1.639	1.589	NA
76095	2	41	5	3	1	1	161.012	82.7	31.9	102.5	0.803097	NA	48	NA	204	2.9	8.4	284	6.7	3	NA	NA	2	1	1	1	0	240	NA	0	0	0	2	0	0	0	0	0	0	NA	0	0	NA	7.13	4.35	NA	1.882	0.92	NA
82780	2	28	5	3	1	3	167.126	89.1	31.9	104.3	0.802113	NA	49	NA	156	3.3	1.9	221	6.9	1	NA	NA	2	1	2	2	0	300	NA	0	0	0	0	2	1	0	0	0	0	NA	0	0	NA	6.03	4.47	NA	2.875	2.432	NA
89211	2	29	3	3	1	1	153.026	74.7	31.9	98.5	0.791638	NA	42	NA	193	3.4	3.4	173	6.7	1	NA	NA	2	1	3	2	0	360	NA	0	0	0	0	0	0	0	0	0	NA	NA	7	0	NA	0.82	0.69	NA	0.883	0.522	NA
110186	2	27	4	4	3	1	153.128	74.8	31.9	98.1	0.78816	NA	55	NA	185	3.1	2.8	289	6.5	1	NA	NA	2	1	3	2	0	840	NA	1	1	1	1	0	0	0	0	0	0	NA	0	0	NA	1.61	6.91	NA	0.666	3.177	NA
122041	2	33	2	2	1	1	160.231	81.9	31.9	98	0.769707	33	55	86	148	1.7	3.7	361	7.7	0	NA	NA	2	1	4	2	0	120	NA	0	0	0	0	2	2	0	0	0	0	NA	0	0	NA	2.93	1.05	NA	1.998	1.025	NA
80107	2	44	3	5	1	2	167.781	89.8	31.9	99.3	0.762168	51	92	124	226	1.5	2.2	289	6.5	1	NA	NA	2	1	1	2	1	120	NA	0	0	0	0	1	1	0	0	0	1	NA	76.6	0	NA	11.2	2.33	NA	2.929	2.234	NA
80005	2	40	2	3	3	1	155.162	76.8	31.9	95.2	0.759831	64	46	118	177	2.7	4.7	254	7.1	1	NA	NA	2	1	4	2	0	300	NA	3	0	0	1	1	0	0	0	0	0	NA	0	0	NA	2.14	1.9	NA	1.216	1.307	NA
110342	2	34	4	4	1	1	162.755	84.5	31.9	96.2	0.74969	NA	63	NA	169	2.2	2.4	241	7	0	NA	NA	2	1	2	2	0	300	NA	0	0	1	0	1	0	0	0	0	0	NA	0	0	NA	3.65	5.13	NA	1.464	1.777	NA
113807	2	28	2	2	1	1	165.784	87.4	31.8	115	0.889833	77	51	152	218	2.2	4.4	248	6.9	1	NA	NA	2	1	6	1	0	120	NA	0	1	1	0	1	1	0	0	0	0	NA	0	0	NA	6.76	9.03	NA	4.707	3.967	NA
114124	2	36	3	4	2	2	159.697	81.1	31.8	109.8	0.865637	NA	46	NA	215	2.5	3.7	333	7.4	1	NA	NA	2	1	3	2	0	480	NA	0	0	1	1	0	0	0	0	0	0	NA	0	0	NA	3.64	2.91	NA	1.051	2.263	NA
119097	2	40	5	1	1	1	165.214	86.8	31.8	110.4	0.855712	NA	51	NA	276	2	7.8	236	6.3	3	NA	NA	2	1	5	2	0	120	NA	0	0	0	0	0	0	0	0	0	NA	NA	0	0	NA	0.52	0.63	NA	0.479	0.529	NA
75755	2	41	3	5	1	2	165.499	87.1	31.8	107.6	0.833291	NA	42	NA	139	2.6	5.1	192	7.5	1	NA	NA	2	1	3	2	0	720	NA	0	0	0	0	0	0	0	0	0	NA	NA	0	0	NA	7.95	2.89	NA	2.433	1.053	NA
75393	2	30	4	4	3	1	176.086	98.6	31.8	110.8	0.831877	87	58	91	166	2.3	4.3	298	7.3	1	NA	NA	2	1	4	2	0	600	NA	1	1	3	1	0	0	0	1	0	1	NA	42.4	12.7	NA	4.87	9.08	NA	1.307	2.807	NA
80740	2	39	3	4	3	1	158.014	79.4	31.8	104.8	0.830606	NA	48	NA	219	3.8	5.1	341	6.6	3	NA	NA	2	1	6	2	0	480	NA	0	0	1	0	0	1	0	0	0	0	NA	0	0	NA	1.32	1.23	NA	0.208	0.248	NA
118344	2	45	3	3	1	1	150.993	72.5	31.8	102.2	0.828619	NA	39	NA	181	2.3	6.1	174	6.4	0	NA	NA	2	1	2	2	0	120	NA	0	0	0	0	0	0	0	0	0	NA	NA	0	0	NA	6.57	6.68	NA	2.63	2.327	NA
76453	2	42	3	5	1	2	164.928	86.5	31.8	105.5	0.818441	NA	95	NA	231	1.8	3.7	173	6.8	1	NA	NA	2	1	1	2	1	480	NA	0	0	2	2	0	2	2	0	0	1	NA	106.8	NA	NA	2.42	NA	NA	0.636	NA	NA
77795	2	34	4	4	3	1	161.654	83.1	31.8	100.4	0.786724	127	52	59	136	2.9	3.1	251	6.9	1	NA	NA	2	1	2	2	0	720	NA	0	0	0	0	0	0	0	0	0	NA	NA	0	0	NA	8.32	6.88	NA	2.786	1.46	NA
117191	2	36	1	5	1	1	147.196	68.9	31.8	95	0.780113	101	38	90	148	2.2	4.4	261	7.2	1	NA	NA	2	1	2	2	0	660	NA	1	0	0	1	0	0	1	0	0	0	NA	0	0	NA	3.26	2.79	NA	1.011	0.943	NA
121401	2	35	1	3	1	1	163.684	85.2	31.8	99.4	0.774043	96	54	71	144	2.2	3.1	246	6.5	1	NA	NA	2	1	4	2	0	60	NA	0	0	0	1	0	0	0	0	0	0	NA	0	0	NA	5.23	7.94	NA	0.946	2.624	NA
85343	2	21	1	3	3	1	164.355	85.9	31.8	99.2	0.770907	92	52	77	147	3.3	3	276	7.3	1	NA	NA	2	1	1	2	0	240	NA	0	1	2	1	2	1	2	0	0	1	NA	0	0	NA	3.01	2.27	NA	0.401	1.424	NA
109926	2	45	4	5	1	3	160.679	82.1	31.8	96.1	0.755312	NA	66	NA	255	2.7	2.5	265	7.3	1	NA	NA	2	1	4	2	0	840	NA	0	0	0	0	0	0	0	0	0	NA	NA	0	0	NA	1.48	1.95	NA	1.021	0.953	NA
81319	2	38	4	4	3	1	164.833	86.4	31.8	97.2	0.754269	43	63	95	167	2.6	2.7	317	8.1	1	NA	NA	2	1	7	1	0	120	NA	0	0	0	1	0	0	0	0	0	0	NA	0	0	NA	8.09	1.51	NA	1.64	0.974	NA
109545	2	36	5	3	1	3	156.314	77.7	31.8	93	0.741082	165	55	113	201	2.1	4.2	198	7.4	3	NA	NA	2	1	5	2	0	120	NA	0	0	0	1	0	0	0	1	0	0	NA	0	0	NA	2.24	4.38	NA	2.252	1.488	NA
89927	2	41	3	4	1	1	160.539	81.7	31.7	120.6	0.950277	116	43	132	198	2.1	3.8	284	6.7	0	NA	NA	2	1	7	2	0	240	NA	0	0	0	1	0	0	1	0	0	0	NA	0	0	NA	2.57	2.18	NA	1.128	0.892	NA
124561	2	29	3	4	1	1	165.95	87.3	31.7	117.2	0.908307	NA	56	NA	206	2.8	6.7	296	7	1	NA	NA	2	1	1	1	1	360	NA	2	1	2	2	3	0	0	0	0	1	NA	11.2	18.7	NA	2.98	2.07	NA	1.099	1.645	NA
124517	2	39	2	1	1	1	155.245	76.4	31.7	111.1	0.890224	289	44	137	239	2.1	4.3	268	7	1	NA	NA	2	1	2	2	0	120	NA	2	2	1	3	0	0	0	0	0	1	NA	0	0	NA	0.32	1.85	NA	2.172	0.882	NA
111946	2	29	3	4	1	1	158.164	79.3	31.7	110	0.873239	NA	41	NA	205	2.1	5.3	458	7.1	1	NA	NA	2	1	2	2	0	240	NA	1	1	1	1	1	1	0	0	0	1	NA	NA	NA	NA	NA	NA	NA	NA	NA	NA
80519	2	36	1	3	1	1	150.499	71.8	31.7	107	0.870786	154	45	129	205	3	3.1	261	6.6	1	NA	NA	2	1	2	1	0	240	NA	0	0	0	0	2	0	0	0	0	0	NA	58.9	0	NA	4.05	4.58	NA	2.569	2.206	NA
109866	2	28	3	4	1	1	165.665	87	31.7	111.5	0.864876	NA	57	NA	177	1.9	4.6	220	7.2	1	NA	NA	2	1	4	2	1	720	NA	1	1	1	2	0	1	0	0	0	1	NA	80.6	14	NA	2	2.46	NA	1.83	1.556	NA
82803	2	23	1	4	1	1	162.006	83.2	31.7	107.1	0.840073	98	46	126	192	2.1	5.1	287	7.8	3	NA	NA	2	1	1	2	0	420	NA	0	0	0	0	0	0	0	0	0	NA	NA	0	0	NA	6.57	11.35	NA	3.43	4.517	NA
83083	2	23	2	2	1	1	171.834	93.6	31.7	110	0.837785	NA	45	NA	190	2.5	5.7	310	7.3	1	NA	NA	2	1	1	2	0	840	NA	0	0	1	1	1	0	0	0	0	0	NA	14	0	NA	7.22	3.9	NA	3.62	3.648	NA
87665	2	44	1	2	1	3	148.812	70.2	31.7	102	0.834785	NA	27	NA	200	2.7	7	377	7.4	3	NA	NA	1	1	7	2	1	300	NA	0	0	2	0	0	0	0	2	0	0	NA	0	0	NA	2.48	4.32	NA	1.443	2.151	NA
80590	2	43	3	3	2	1	165.283	86.6	31.7	106.6	0.827821	68	43	79	136	1.8	4.5	163	6.1	1	NA	NA	2	1	2	2	0	240	NA	0	0	0	3	0	0	0	0	0	0	NA	0	0	NA	3.32	8.39	NA	1.124	2.184	NA
88333	2	43	4	4	1	1	166.803	88.2	31.7	106.8	0.825587	NA	52	NA	218	2.1	4.3	307	7.2	3	NA	NA	2	1	2	2	0	180	NA	1	0	1	1	0	0	0	0	0	0	NA	0	0	NA	6.07	3.54	NA	1.186	0.907	NA
110116	2	35	3	4	1	1	165.569	86.9	31.7	105.7	0.820122	NA	56	NA	182	2	6.2	239	7.3	1	NA	NA	2	1	3	2	0	120	NA	0	0	0	1	0	0	0	0	0	0	NA	0	0	NA	4.41	2.47	NA	0.751	0.574	NA
111833	2	26	4	4	1	1	154.43	75.6	31.7	102	0.819461	NA	67	NA	175	2.2	3.1	259	7.4	1	NA	NA	2	1	3	2	0	480	NA	0	0	0	1	0	0	0	0	0	0	NA	0	0	NA	3.53	1.42	NA	1.488	0.533	NA
124759	2	33	1	3	1	3	155.954	77.1	31.7	101.7	0.813048	89	68	126	212	1.2	5.6	260	7.2	1	NA	NA	2	1	2	2	0	240	NA	0	0	0	0	0	0	0	0	0	NA	NA	2	0	NA	2.26	0.32	NA	0.777	0.387	NA
111504	2	32	3	4	1	1	160.736	81.9	31.7	103	0.811101	56	39	95	145	1.2	5	163	6.6	1	NA	NA	2	1	8	2	1	120	NA	0	0	1	1	0	0	0	0	0	0	NA	0	59.5	NA	1.48	1.65	NA	2.264	2.4	NA
91261	2	44	3	5	3	1	162.88	84.1	31.7	102.8	0.804179	82	59	70	145	1.8	3.5	249	6.7	1	NA	NA	2	1	3	2	0	120	NA	0	0	0	1	0	1	0	0	0	0	NA	0	0	NA	4.68	8.29	NA	2.004	1.613	NA
88440	2	39	3	3	1	1	166.709	88.1	31.7	103.2	0.797984	NA	39	NA	167	2.8	4.8	416	6.9	1	NA	NA	3	1	4	1	0	240	NA	0	0	0	0	0	0	0	0	0	NA	NA	0	NA	NA	10.22	NA	NA	5.211	NA	NA
89829	2	39	1	1	2	1	150.394	71.7	31.7	95.6	0.778282	NA	63	NA	203	2.1	5.4	331	6.2	1	NA	NA	2	1	8	2	0	60	NA	0	0	0	3	3	0	0	0	0	0	NA	0	0	NA	4.22	3.86	NA	1.057	2.744	NA
80808	2	23	4	3	1	2	165.188	86.5	31.7	97.9	0.760479	NA	NA	NA	NA	NA	NA	NA	NA	1	NA	NA	2	1	1	2	0	420	NA	0	1	0	0	0	0	0	0	0	0	NA	0	0	NA	3.58	2.87	NA	1.358	0.771	NA
84090	2	26	3	5	3	1	167.652	89.1	31.7	98.6	0.760267	NA	NA	NA	NA	NA	NA	NA	NA	1	NA	NA	2	1	1	2	0	120	NA	0	0	0	1	0	0	0	0	0	0	NA	0	0	NA	5	1.7	NA	1.622	1.636	NA
110419	2	35	4	4	1	1	166.992	88.4	31.7	96.8	0.747861	57	45	127	183	2.8	1.7	286	6.9	1	NA	NA	2	1	3	2	0	120	NA	0	0	0	1	1	0	0	0	0	0	NA	0	0	NA	4.22	5.47	NA	2.611	2.105	NA
79169	2	32	3	4	1	1	170.535	91.9	31.6	118.2	0.905564	222	34	110	188	3.3	6	324	7	3	NA	NA	2	1	3	2	0	180	NA	0	0	0	0	0	0	0	0	0	NA	NA	0	0	NA	5.33	6.24	NA	2.207	2.117	NA
115105	2	22	4	3	3	1	159.509	80.4	31.6	110.4	0.874552	NA	47	NA	115	3.3	4.1	329	6.9	1	NA	NA	2	1	1	2	0	360	NA	0	0	2	2	0	0	0	0	0	0	NA	0	0	NA	10.24	4.76	NA	1.581	0.818	NA
85781	2	37	1	4	1	1	158.813	79.7	31.6	109.1	0.866145	NA	30	NA	188	3.3	5.5	251	7.6	1	NA	NA	2	1	3	2	1	180	NA	1	0	3	2	3	0	1	0	0	1	NA	0	0	NA	2.03	14.65	NA	2.44	4.912	NA
81050	2	38	5	2	1	1	167.067	88.2	31.6	111.2	0.860732	NA	42	NA	148	4.9	2.7	420	7.8	1	NA	NA	2	1	9	2	0	300	NA	0	0	1	1	2	0	0	0	0	1	NA	23.4	0	NA	3.46	3	NA	1.319	2.037	NA
111673	2	25	3	3	1	3	169.885	91.2	31.6	111.4	0.8551	NA	35	NA	204	3	5.9	290	7.8	1	NA	NA	2	1	1	2	0	600	NA	1	1	0	0	0	1	2	2	0	1	NA	0	0	NA	6.98	1.75	NA	0.551	4.087	NA
89705	2	34	4	4	1	1	164.682	85.7	31.6	107.1	0.834977	NA	78	NA	239	2.3	3.1	213	7.1	3	NA	NA	2	1	4	2	0	180	NA	0	0	0	0	0	0	0	0	0	NA	NA	0	0	NA	6.42	4.04	NA	3.394	2.453	NA
117308	2	36	4	4	3	1	165.353	86.4	31.6	104.8	0.815386	NA	39	NA	168	2.1	3.2	314	6.9	1	NA	NA	2	1	6	2	0	240	NA	1	1	1	1	1	1	0	1	1	2	NA	40.9	0	NA	2.36	1.98	NA	1.5	1.174	NA
117923	2	41	3	2	1	1	176.284	98.2	31.6	107.3	0.808541	NA	48	NA	170	1.7	3.2	306	7.3	1	NA	NA	2	1	5	2	0	480	NA	0	1	0	1	0	1	2	0	0	0	NA	138.6	166.3	NA	3.87	1.83	NA	3.17	3.005	NA
114802	2	41	1	2	1	1	153.132	74.1	31.6	99.1	0.801216	296	30	76	165	3.4	3.9	365	7	1	NA	NA	2	1	3	2	0	480	NA	0	0	0	0	0	0	0	0	0	NA	NA	0	0	NA	3.66	1.66	NA	1.603	2.421	NA
120149	2	42	3	5	1	2	162.165	83.1	31.6	99.3	0.780152	NA	52	NA	237	2.4	3.6	237	6.6	1	NA	NA	2	1	1	2	0	600	NA	0	1	0	1	0	1	0	0	0	0	NA	0	0	NA	7.72	0.41	NA	1.734	0.464	NA
114701	2	38	3	5	1	1	171.091	92.5	31.6	97.8	0.748055	NA	45	NA	166	2.6	4.5	258	6.6	1	NA	NA	2	1	4	2	0	240	NA	0	0	0	0	0	0	0	0	0	NA	NA	0	0	NA	8.4	3.88	NA	8.167	2.081	NA
119501	2	39	1	4	1	1	161.54	82.2	31.5	109.9	0.866929	NA	45	NA	138	1.9	3.9	260	7.1	1	NA	NA	2	1	4	1	0	660	NA	0	0	0	0	0	0	0	0	0	NA	NA	0	0	NA	2.13	1.65	NA	0.513	0.491	NA
77304	2	21	3	4	1	1	153.582	74.3	31.5	105.6	0.85432	163	46	145	224	2.1	7.4	399	6.9	1	NA	NA	2	1	3	2	0	900	NA	0	0	2	1	0	0	0	0	0	1	NA	0	0	NA	2.02	3.26	NA	0.871	1.758	NA
74537	2	23	4	3	3	1	155.431	76.1	31.5	104.1	0.83716	97	36	78	133	2.6	6.1	338	6.8	3	NA	NA	2	1	1	2	0	720	NA	0	0	0	0	0	0	0	0	0	NA	NA	0	0	NA	4.34	7.64	NA	0.615	2.468	NA
82139	2	39	1	2	1	3	152.649	73.4	31.5	102.2	0.829337	NA	43	NA	187	2	3.4	212	7	3	NA	NA	2	1	3	2	0	480	NA	0	0	1	1	0	0	0	0	0	2	NA	0	31.4	NA	11.66	8.57	NA	3.414	3.586	NA
78689	2	21	3	2	1	1	156.651	77.3	31.5	103.4	0.828285	NA	64	NA	260	1.8	8.7	133	6.3	3	NA	NA	2	1	1	2	0	360	NA	0	1	3	3	0	0	1	1	0	0	NA	0	0	NA	6.34	3.04	NA	1.766	0.812	NA
91323	2	26	4	4	3	1	172.102	93.3	31.5	106.9	0.81698	64	46	77	136	1.4	2.7	211	5.9	1	NA	NA	2	1	2	2	0	300	NA	0	0	0	0	0	0	0	0	0	NA	NA	43.3	0	NA	5.62	3.19	NA	0.981	1.916	NA
112309	2	39	3	3	1	1	170.154	91.2	31.5	104.2	0.80089	NA	47	NA	189	2	4.6	200	7	1	NA	NA	2	1	4	2	0	60	NA	0	0	0	0	0	0	0	0	0	NA	NA	22.3	0	NA	3.51	2.49	NA	1.249	1.2	NA
117662	2	38	4	4	2	1	176.923	98.6	31.5	101.2	0.762808	NA	36	NA	194	3.1	5.1	297	7.2	1	NA	NA	2	1	4	2	0	480	NA	0	1	0	2	0	0	0	0	0	0	NA	0	0	NA	4.6	1.43	NA	1.237	1.064	NA
81849	2	44	1	2	1	1	157.002	77.4	31.4	102.5	0.821898	128	65	149	240	2	4.5	342	7.6	0	NA	NA	1	1	3	1	0	300	NA	0	0	1	0	0	0	0	0	0	0	NA	0	0	NA	5.32	3.18	NA	2.082	1.377	NA
75504	2	33	3	3	1	1	170.798	91.6	31.4	105.3	0.809532	NA	46	NA	235	2.4	4.3	257	6.9	0	NA	NA	2	1	2	2	0	600	NA	0	0	1	1	0	0	0	0	0	0	NA	0	0	NA	1.26	4.87	NA	1.022	1.048	NA
90036	2	36	5	5	1	2	161.008	81.4	31.4	101.7	0.805275	69	71	151	236	1.5	4.5	308	7.1	3	NA	NA	2	1	3	2	0	420	NA	0	0	0	0	0	0	0	0	0	NA	NA	0	0	NA	5.08	16.38	NA	2.829	2.566	NA
75546	2	37	4	4	1	1	172.006	92.9	31.4	105	0.804386	NA	55	NA	146	2.7	5.5	238	7.5	1	NA	NA	2	1	7	2	0	480	NA	0	0	0	0	2	1	0	0	0	0	NA	0	0	NA	1.68	1.14	NA	1.152	0.52	NA
79707	2	31	3	4	1	1	165.013	85.5	31.4	102.8	0.804046	NA	58	NA	198	2.6	6.2	290	6.8	1	NA	NA	2	1	1	2	0	480	NA	1	0	2	3	3	1	1	0	0	1	NA	14.4	0	NA	1.63	1.37	NA	0.86	0.831	NA
92625	2	38	5	4	1	1	172.098	93	31.4	102.7	0.786555	115	36	142	201	2.6	4.2	284	6.9	1	NA	NA	2	1	3	2	0	240	NA	0	0	0	1	0	0	0	0	0	0	NA	22.3	0	NA	0.9	0.62	NA	1.495	1.352	NA
88099	2	42	2	3	1	1	153.515	74	31.4	96.7	0.784148	65	50	97	160	0.9	3.1	208	7.4	3	NA	NA	2	1	3	2	1	360	NA	0	1	1	3	1	0	3	0	0	0	NA	0	0	NA	4.02	8.41	NA	1.678	3.507	NA
113413	2	32	4	3	1	1	161.107	81.5	31.4	97.3	0.770199	26	57	81	143	2.2	4.2	229	7.5	1	NA	NA	2	1	4	2	0	300	NA	0	0	0	0	0	0	0	0	0	NA	NA	0	0	NA	0.46	2.12	NA	0.689	0.98	NA
77800	2	24	4	2	3	1	158.817	79.2	31.4	91.4	0.728692	NA	39	NA	143	1.5	2.2	169	6.4	1	NA	NA	2	1	7	2	0	960	NA	2	2	1	3	1	1	1	1	0	1	NA	10.8	NA	NA	6.74	NA	NA	1.867	NA	NA
113828	2	42	1	2	1	1	170.238	91	31.4	93.9	0.723077	52	63	126	199	2	3.6	164	7.1	1	NA	NA	2	1	3	2	0	240	NA	1	1	1	1	1	1	1	0	0	0	NA	0	0	NA	5.39	9.5	NA	3.631	2.642	NA
118378	2	23	3	4	1	1	160.57	80.7	31.3	105.2	0.835899	136	72	98	197	2.1	5.4	253	7	1	NA	NA	2	1	3	2	0	240	NA	0	0	1	2	0	0	0	0	0	0	NA	0	0	NA	6.18	3.07	NA	1.209	0.795	NA
122840	2	39	4	5	1	1	155.105	75.3	31.3	103	0.832712	74	49	124	188	1.5	1	275	7.1	0	NA	NA	2	1	3	2	0	600	NA	0	0	0	1	1	0	0	0	0	0	NA	0	0	NA	0.76	1.37	NA	0.939	0.849	NA
122602	2	22	3	4	1	1	158.467	78.6	31.3	103.3	0.82623	48	45	122	177	2.9	3.2	319	6.6	1	NA	NA	2	1	1	2	1	180	NA	1	3	3	3	3	2	3	1	0	2	NA	0	0	NA	3.01	110.69	NA	0.927	1.656	NA
76905	2	33	4	3	3	1	161.562	81.7	31.3	103.4	0.819071	39	60	112	180	1.6	3.8	144	6.9	0	NA	NA	2	1	3	2	0	720	NA	0	0	0	0	0	0	0	0	0	NA	NA	0	NA	NA	3.43	NA	NA	1.013	NA	NA
123108	2	35	1	4	1	1	154.071	74.3	31.3	99.3	0.805487	NA	55	NA	227	2.7	1.9	313	6.7	1	NA	NA	2	1	3	2	0	420	NA	0	0	0	0	0	0	0	0	0	NA	NA	0	0	NA	3.88	3.4	NA	0.828	1.23	NA
115307	2	29	3	5	1	1	172.651	93.3	31.3	103.5	0.793097	57	36	119	166	2.5	7.3	239	7.2	1	NA	NA	2	1	1	2	0	360	NA	0	0	0	0	0	0	0	0	0	NA	NA	0	0	NA	12.52	5.94	NA	2.858	1.323	NA
78309	2	36	1	2	2	1	156.54	76.7	31.3	98.5	0.792673	50	56	139	205	2.6	3.6	276	6.7	1	NA	NA	2	1	4	2	0	300	NA	0	0	0	2	2	2	1	0	0	0	NA	0	0	NA	7.34	4.58	NA	2.706	2.483	NA
77221	2	39	3	4	1	1	167.58	87.9	31.3	100	0.777785	393	28	38	145	1.9	4.6	194	7.2	1	NA	NA	2	1	1	2	1	420	NA	0	0	0	0	0	0	0	0	0	NA	NA	0	0	NA	1.94	3.2	NA	2.366	2.384	NA
81836	2	36	4	5	1	1	173.113	93.8	31.3	100.5	0.769081	70	54	140	208	2.5	4.2	283	6.8	1	NA	NA	2	1	7	2	0	600	NA	0	0	0	2	0	0	0	0	0	0	NA	0	0	NA	3.11	2.98	NA	1.247	2.386	NA
75890	2	43	3	2	1	1	158.769	78.9	31.3	94.6	0.755924	80	59	142	217	2.9	2.9	247	7.5	0	NA	NA	2	1	2	1	1	720	NA	0	0	1	2	1	3	2	0	0	0	NA	0	0	NA	0.92	4.26	NA	1.966	1.305	NA
77176	2	41	1	2	1	1	161.126	81	31.2	113	0.898241	238	40	115	203	2	3.2	238	7.3	1	NA	NA	1	1	6	1	0	480	NA	0	0	1	3	2	0	1	0	0	0	NA	0	0	NA	0.6	1.87	NA	1.405	2.872	NA
75399	2	27	5	5	1	1	151.171	71.3	31.2	106.4	0.873182	NA	48	NA	218	3.7	5.5	281	7.7	3	NA	NA	2	1	3	2	0	240	NA	0	0	0	2	0	0	0	0	0	0	NA	0	0	NA	4.12	3.46	NA	1.805	1.932	NA
79605	2	22	1	2	2	3	159.828	79.7	31.2	107.2	0.85559	NA	51	NA	212	2.6	4.9	189	7.7	1	NA	NA	2	1	3	2	0	120	NA	0	0	0	0	0	0	0	0	0	NA	NA	0	0	NA	1.13	5.05	NA	0.906	1.259	NA
117287	2	44	4	4	2	1	176.686	97.4	31.2	112	0.850186	NA	35	NA	136	2.7	5	261	7	1	NA	NA	1	1	2	2	0	348	NA	1	0	1	1	0	1	1	0	0	1	NA	0	0	NA	5.21	0.91	NA	1.09	0.467	NA
78149	2	38	4	2	3	1	160.428	80.3	31.2	104	0.828495	180	40	124	200	2.3	2.8	335	6.8	1	NA	NA	2	1	5	2	0	660	NA	0	1	2	1	1	1	0	0	0	1	NA	0	0	NA	5.24	4.53	NA	2.062	2.184	NA
88110	2	32	1	4	3	1	164.18	84.1	31.2	104.8	0.825273	NA	43	NA	146	2	5.1	215	7	1	NA	NA	2	1	1	2	0	480	NA	0	0	0	1	0	0	0	0	0	0	NA	0	0	NA	1.29	1.77	NA	0.801	1.808	NA
85244	2	43	2	1	2	1	152.962	73	31.2	99.6	0.812576	NA	37	NA	206	2.7	3.3	280	7.5	1	NA	NA	2	1	3	2	0	240	NA	3	1	3	3	3	3	2	3	1	1	NA	0	0	NA	1.99	3.08	NA	0.393	1.079	NA
117209	2	35	1	3	1	1	150.958	71.1	31.2	98.2	0.806454	NA	42	NA	207	3	5	319	8	0	NA	NA	2	1	6	2	0	480	NA	0	0	1	2	0	0	1	0	0	0	NA	0	0	NA	2.54	2.54	NA	1.076	1.263	NA
113680	2	36	3	5	2	1	176.505	97.2	31.2	105.8	0.803535	NA	46	NA	168	2	4.2	248	6.9	1	NA	NA	2	1	2	2	0	480	NA	0	0	0	0	0	0	0	0	0	NA	NA	0	0	NA	6.09	2.64	NA	2.121	1.301	NA
89980	2	33	2	4	1	1	168.23	88.3	31.2	103.1	0.802055	NA	42	NA	171	2	3.4	297	7.3	1	NA	NA	2	1	3	2	0	240	NA	0	0	0	1	0	0	0	0	0	0	NA	0	NA	NA	13.44	NA	NA	10.682	NA	NA
91366	2	28	1	4	1	1	155.353	75.3	31.2	98.9	0.800632	50	47	112	169	1.6	2.3	257	6.5	1	NA	NA	2	1	1	2	0	300	NA	0	0	1	1	1	0	1	0	0	0	NA	0	0	NA	4.73	3.81	NA	2.232	1.165	NA
114112	2	23	2	4	1	1	166.217	86.2	31.2	101	0.79046	NA	NA	NA	NA	NA	NA	NA	NA	1	NA	NA	2	1	1	2	0	840	NA	1	0	3	1	2	1	0	0	0	0	NA	0	0	NA	3.77	2.25	NA	3.134	1.925	NA
124603	2	22	4	3	1	1	164.375	84.3	31.2	99.1	0.779924	NA	NA	NA	NA	NA	NA	NA	NA	0	NA	NA	2	1	1	2	0	348	NA	1	2	1	3	1	0	0	0	0	0	NA	0	0	NA	1.35	11.31	NA	1.02	3.877	NA
89175	2	44	1	1	1	1	144.781	65.4	31.2	92	0.771488	154	46	124	201	3.1	3.9	292	6.9	3	NA	NA	2	1	1	2	0	180	NA	1	1	1	1	0	0	0	0	0	0	NA	0	0	NA	1.26	1.78	NA	0.536	1.353	NA
75949	2	40	1	4	1	1	165.904	85.6	31.1	111.2	0.872977	185	48	148	233	3.1	5.3	283	7.3	0	NA	NA	2	1	4	2	0	300	NA	3	2	1	3	1	1	1	0	0	2	NA	0	0	NA	0.66	1.21	NA	1.442	1.827	NA
90184	2	36	4	4	3	1	165.516	85.2	31.1	109.7	0.86221	NA	60	NA	178	2.2	2.1	194	7	1	NA	NA	2	1	2	2	0	480	NA	1	1	1	0	1	1	1	0	0	0	NA	0	0	NA	6.86	1.3	NA	2.021	1.573	NA
86308	2	22	2	2	1	1	146.448	66.7	31.1	102.3	0.854792	150	48	95	173	3.3	5.4	382	7.2	3	NA	NA	2	1	2	2	0	300	NA	0	0	0	0	0	0	0	0	0	NA	NA	0	0	NA	7.3	3.49	NA	2.235	1.656	NA
78705	2	37	1	2	1	1	172.274	92.3	31.1	110.6	0.852062	NA	41	NA	184	3.9	9.2	367	7.3	0	NA	NA	2	1	4	2	0	300	NA	0	1	0	0	0	0	0	0	0	0	NA	0	NA	NA	2.41	NA	NA	0.705	NA	NA
114425	2	43	2	4	1	1	154.774	74.5	31.1	104.2	0.846925	NA	43	NA	197	3.1	7.5	263	7.8	3	NA	NA	2	1	4	2	0	660	NA	0	0	0	2	0	0	0	0	0	0	NA	0	0	NA	2.2	1.27	NA	1.215	1.117	NA
120428	2	45	3	4	1	1	160.185	79.8	31.1	105.8	0.845282	NA	46	NA	238	1.7	5.2	316	7.5	1	NA	NA	2	1	5	2	0	360	NA	0	0	0	1	0	0	1	0	0	0	NA	42.1	29.8	NA	6.05	4.31	NA	1.833	1.715	NA
75858	2	20	4	3	3	1	168.214	88	31.1	107.7	0.839676	NA	108	NA	239	1.6	6.8	143	6.3	0	NA	NA	2	1	2	2	0	300	NA	0	0	0	1	0	0	0	0	0	0	NA	0	0	NA	3.55	6.05	NA	2.778	3.259	NA
85476	2	30	2	3	1	1	163.463	83.1	31.1	105.9	0.837553	NA	88	NA	203	1.1	5.6	215	6.8	0	NA	NA	2	1	4	2	0	180	NA	0	0	1	2	1	0	0	0	0	0	NA	0	0	NA	4.83	1.58	NA	2.418	1.285	NA
109972	2	41	1	3	1	1	152.893	72.7	31.1	102.1	0.834946	NA	NA	NA	NA	NA	NA	NA	NA	1	NA	NA	2	1	6	2	0	30	NA	1	0	2	1	1	0	1	1	0	1	NA	0	0	NA	3.69	2.58	NA	1.43	1.618	NA
111871	2	43	3	3	1	1	159.077	78.7	31.1	99.9	0.800918	NA	41	NA	241	4.7	5.4	146	7.1	1	NA	NA	2	1	1	1	0	300	NA	0	0	0	0	0	0	0	0	0	NA	NA	0	0	NA	1.63	1.82	NA	0.401	2.051	NA
119829	2	35	4	5	3	1	155.189	74.9	31.1	98.6	0.800337	153	48	153	232	2.3	4	182	6.5	1	NA	NA	2	1	1	2	0	660	NA	2	3	2	2	0	2	3	0	0	1	NA	0	18.6	NA	5.61	6.35	NA	0.754	0.944	NA
121642	2	34	3	4	1	1	163.069	82.7	31.1	100.7	0.797388	NA	89	NA	217	2	2.9	203	7.1	1	NA	NA	2	1	3	2	0	240	NA	0	0	0	1	1	0	0	0	0	0	NA	0	0	NA	1.98	3.1	NA	0.556	0.994	NA
90153	2	34	1	2	1	1	148.519	68.6	31.1	94.7	0.785752	NA	52	NA	168	3.4	6.5	303	7.2	1	NA	NA	2	1	6	2	0	180	NA	0	0	0	0	0	0	0	0	0	NA	NA	0	18.5	NA	3.86	5.93	NA	1.634	3.667	NA
82430	2	24	2	4	1	1	161.285	80.9	31.1	96.8	0.770734	153	43	86	160	2.3	7.2	350	7.4	1	NA	NA	2	1	2	2	0	480	NA	0	0	3	1	0	0	0	0	0	0	NA	0	0	NA	2.16	9.1	NA	1.185	2.192	NA
117628	2	39	3	2	2	1	158.976	78.6	31.1	94.3	0.756262	NA	50	NA	161	1.3	5	175	7.4	1	NA	NA	1	1	6	1	0	120	NA	2	3	3	3	2	2	3	1	1	1	NA	33.5	0	NA	1.29	0.7	NA	1.097	0.471	NA
76388	2	43	3	4	2	1	154.462	74.2	31.1	92.5	0.752588	NA	68	NA	175	2.5	3.5	196	6.7	1	NA	NA	2	1	6	2	0	360	NA	1	0	0	1	0	0	1	0	0	1	NA	0	3.8	NA	1.8	1.92	NA	0.75	0.596	NA
123875	2	20	3	4	3	1	165.516	85.2	31.1	94.7	0.744315	NA	NA	NA	NA	NA	NA	NA	NA	1	NA	NA	2	1	1	2	0	300	NA	0	0	1	1	0	0	3	0	0	0	NA	0	NA	NA	4.04	NA	NA	2.023	NA	NA
87131	2	27	2	3	3	1	165.1	84.5	31	107.5	0.8478	NA	56	NA	185	2.3	3	212	7	1	NA	NA	2	1	3	2	0	660	NA	0	0	0	1	1	0	0	0	0	0	NA	112.3	0	NA	4.08	2.66	NA	1.98	3.512	NA
119161	2	29	4	4	3	1	166.268	85.7	31	104.2	0.818883	55	60	102	173	1.8	5.7	187	7.2	1	NA	NA	2	1	3	1	0	300	NA	0	0	2	2	2	0	0	0	0	1	NA	0	NA	NA	3.89	NA	NA	2.275	NA	NA
91156	2	29	5	5	1	1	166.656	86.1	31	103.4	0.81165	NA	52	NA	186	2.2	4.1	284	7.1	1	NA	NA	2	1	2	3	1	480	NA	0	0	0	1	0	0	0	0	0	0	NA	0	NA	NA	2.97	NA	NA	0.574	NA	NA
121343	2	45	5	4	3	1	165.977	85.4	31	103	0.810162	NA	67	NA	192	2.5	5.6	243	6.2	1	NA	NA	2	1	8	2	0	480	NA	0	0	0	0	0	0	0	0	0	NA	NA	44.6	22.3	NA	7.7	4.65	NA	2.665	1.84	NA
113486	2	27	5	4	3	1	155.543	75	31	98	0.796269	183	37	115	189	2.8	4.9	273	7.7	1	NA	NA	2	1	1	2	0	600	NA	1	0	1	1	1	0	0	0	0	0	NA	0	0	NA	2.21	6.74	NA	0.538	2.209	NA
75820	2	43	5	4	1	2	158.623	78	31	98.2	0.790109	NA	53	NA	200	4.1	5.3	230	7.2	3	NA	NA	2	1	2	2	0	180	NA	0	0	0	0	0	0	0	0	0	NA	NA	0	0	NA	3.44	6.92	NA	2.275	1.987	NA
74196	2	36	3	4	1	2	174.781	94.7	31	101.1	0.774931	72	57	120	191	1.1	3.4	202	6.8	1	NA	NA	2	1	1	1	1	360	NA	0	0	3	1	0	0	0	0	0	0	NA	0	0	NA	5.51	2.83	NA	1.597	2.033	NA
115229	2	20	3	4	3	1	166.365	85.8	31	97.7	0.767577	110	44	89	155	3.1	4.6	219	6.6	1	NA	NA	2	1	1	2	0	60	NA	0	1	1	0	1	0	0	1	0	0	NA	0	0	NA	1.44	2.49	NA	0.45	1.39	NA
76316	2	45	3	4	1	1	170.199	89.8	31	98.5	0.765097	317	39	92	194	2.4	4.7	207	6.8	1	NA	NA	2	1	2	1	1	300	NA	3	2	1	1	0	1	1	0	0	1	NA	0	0	NA	3.87	5.92	NA	1.426	1.799	NA
109727	2	42	3	3	3	3	153.56	73.1	31	92.1	0.753147	NA	66	NA	172	2	4.8	343	6.5	1	NA	NA	2	1	2	2	0	30	NA	0	0	0	0	0	0	0	0	0	NA	NA	0	0	NA	2.47	1.87	NA	1.934	0.975	NA
74148	2	42	3	5	1	1	164.484	83.6	30.9	109.4	0.866263	NA	45	NA	221	2.4	4.8	238	8.4	1	NA	NA	2	1	6	2	1	348	NA	2	1	3	1	3	2	3	3	1	3	NA	0	0	NA	2.4	1.17	NA	0.858	0.416	NA
79857	2	41	2	2	3	1	159.996	79.1	30.9	105.9	0.850229	NA	54	NA	246	2.7	5.5	239	7.5	1	NA	NA	1	1	3	1	0	180	NA	0	1	1	1	1	1	1	1	1	1	NA	0	0	NA	3.18	1.05	NA	0.555	0.753	NA
117168	2	44	5	3	3	1	166.44	85.6	30.9	107	0.842266	76	67	90	172	2.3	2.4	220	7.3	1	NA	NA	2	1	5	2	0	120	NA	0	0	1	1	0	0	0	0	0	0	NA	16.4	0	NA	1.2	0.56	NA	0.866	0.195	NA
84021	2	29	5	4	1	1	162.405	81.5	30.9	105.6	0.841508	NA	60	NA	170	1.9	4.1	190	7.2	1	NA	NA	2	1	4	2	0	120	NA	0	0	0	0	0	0	0	0	0	NA	NA	0	NA	NA	8.49	NA	NA	2.088	NA	NA
87130	2	42	3	4	3	1	169.427	88.7	30.9	101.8	0.794238	NA	40	NA	195	1.8	3.9	264	7.5	0	NA	NA	2	1	4	1	0	600	NA	0	0	3	3	0	0	0	0	0	0	NA	0	0	NA	1.28	2.67	NA	1.56	1.038	NA
91479	2	37	4	3	2	1	161.706	80.8	30.9	99.2	0.792215	NA	56	NA	188	2.6	6.6	268	7	1	NA	NA	2	1	4	2	1	600	NA	0	0	2	0	2	0	0	0	0	0	NA	0	0	NA	1.1	2.04	NA	1.244	1.788	NA
120017	2	45	5	3	1	1	153.492	72.8	30.9	94.8	0.777069	NA	58	NA	259	2.6	4.5	429	8.4	3	NA	NA	2	1	7	2	0	30	NA	0	0	0	0	0	0	0	0	0	NA	NA	0	0	NA	1.38	3.1	NA	0.747	3.206	NA
78652	2	42	1	4	1	3	161.806	80.9	30.9	97.2	0.776002	NA	31	NA	225	2.3	5.7	317	7	3	NA	NA	2	1	4	2	0	300	NA	1	1	1	1	1	0	0	0	0	0	NA	0	0	NA	1.57	4.5	NA	1.641	2.538	NA
113125	2	44	5	4	1	1	160.602	79.7	30.9	89.4	0.716402	65	85	138	236	1.4	4.3	398	6.7	1	NA	NA	2	1	3	2	0	360	NA	0	0	0	0	0	0	0	0	0	NA	NA	NA	NA	NA	NA	NA	NA	NA	NA	NA
90323	2	45	1	3	3	1	154.018	73.3	30.9	87.1	0.712732	NA	73	NA	170	1.8	6.6	315	7.6	1	NA	NA	2	1	3	2	0	720	NA	0	0	1	0	0	0	0	0	0	0	NA	0	0	NA	4.57	0.19	NA	0.984	0.403	NA
91581	2	35	3	5	1	2	155.839	74.8	30.8	102.8	0.838085	NA	63	NA	248	2.1	3.8	236	6.7	1	NA	NA	2	1	2	2	1	600	NA	0	1	0	0	1	0	0	0	0	0	NA	11.2	22.3	NA	2.49	2.78	NA	1.393	2.053	NA
120203	2	41	4	4	1	1	165.831	84.7	30.8	106	0.837733	111	46	144	212	3.2	7.7	330	7.2	1	NA	NA	2	1	2	2	0	120	NA	1	0	0	1	1	1	0	0	0	0	NA	0	4.1	NA	4.47	3.38	NA	3.074	1.708	NA
87487	2	43	1	4	3	1	170.275	89.3	30.8	106.3	0.829069	NA	55	NA	155	3.4	5.5	245	7.6	1	NA	NA	1	1	2	2	0	600	NA	1	1	1	1	1	1	1	0	1	1	NA	0	0	NA	6.52	2.44	NA	2.378	1.126	NA
117556	2	39	3	3	1	1	171.51	90.6	30.8	104.8	0.814423	119	34	87	145	2.3	4.7	339	6.8	1	NA	NA	2	1	7	2	0	180	NA	0	0	2	1	0	0	0	0	0	0	NA	0	0	NA	1.42	2.71	NA	0.155	0.905	NA
114070	2	35	4	4	1	1	159.647	78.5	30.8	100	0.805477	NA	NA	NA	NA	NA	NA	NA	NA	0	NA	NA	2	1	3	2	0	600	NA	0	0	0	0	0	0	0	0	0	NA	NA	0	0	NA	6.96	5.02	NA	2.855	3.138	NA
76523	2	30	3	2	1	3	157.394	76.3	30.8	97.5	0.790941	NA	60	NA	160	2.2	7.4	221	6.8	1	NA	NA	2	1	4	2	0	480	NA	3	3	3	3	3	3	3	0	2	2	NA	0	0	NA	10.04	1.7	NA	4.56	5.492	NA
112847	2	23	3	2	1	1	163.266	82.1	30.8	98.2	0.782161	80	42	80	138	2.6	10.9	367	6.4	1	NA	NA	2	1	4	2	0	120	NA	0	0	0	1	0	0	1	0	0	0	NA	NA	NA	NA	NA	NA	NA	NA	NA	NA
109602	2	43	2	1	3	3	157.6	76.5	30.8	95.9	0.777452	55	42	138	191	2.2	2.5	272	7	1	NA	NA	2	1	4	1	0	240	NA	0	0	0	0	0	0	0	0	0	NA	NA	0	0	NA	2.38	10.15	NA	2.225	4.069	NA
87901	2	38	3	3	3	3	164.356	83.2	30.8	96.4	0.765274	79	56	103	175	1.8	5.4	197	7.1	1	NA	NA	2	1	2	2	0	360	NA	0	0	0	0	0	0	0	0	0	NA	NA	0	0	NA	0.53	0.97	NA	0.731	2.114	NA
112622	2	43	2	5	2	1	158.524	77.4	30.8	94.3	0.762249	53	68	71	150	1.6	5.6	212	7.2	1	NA	NA	2	1	2	2	0	60	NA	0	0	0	0	0	0	0	0	0	NA	NA	11.5	0	NA	1.98	0.95	NA	1.144	0.3	NA
79473	2	27	3	2	3	1	164.554	83.4	30.8	95.9	0.760848	150	38	109	177	2.9	5.7	199	6.7	1	NA	NA	2	1	1	2	0	360	NA	0	0	1	1	0	0	0	0	0	0	NA	0	0	NA	2.4	3.79	NA	1.75	0.715	NA
84539	2	25	3	3	3	3	169.415	88.4	30.8	96.4	0.753762	56	60	49	120	1.4	4.6	196	6.6	1	NA	NA	2	1	3	2	0	180	NA	0	0	0	0	0	0	0	0	0	NA	NA	42.1	24.6	NA	3.2	10.6	NA	2.136	1.958	NA
117629	2	43	1	1	2	1	154.097	72.9	30.7	102.3	0.840529	NA	43	NA	267	2.7	5.7	263	7.9	1	NA	NA	2	1	7	2	0	120	NA	1	1	1	1	1	1	0	0	1	1	NA	0	0	NA	3.75	5.35	NA	1.358	1.851	NA
124069	2	23	1	3	1	1	155.884	74.6	30.7	102.8	0.839784	182	43	115	194	2.4	3.7	252	7	3	NA	NA	1	1	3	1	0	240	NA	0	0	0	1	0	0	0	0	0	1	NA	0	0	NA	5.39	14.2	NA	4.326	6.26	NA
81101	2	38	3	5	1	1	159.294	77.9	30.7	103	0.832361	96	67	157	243	2.4	4.8	273	6.9	1	NA	NA	2	1	2	2	0	540	NA	1	1	1	0	1	1	0	0	0	0	NA	59.7	22.3	NA	3.92	3.82	NA	2.48	2.906	NA
115346	2	39	5	4	3	1	158.987	77.6	30.7	101.6	0.82184	134	31	91	149	2.1	3.2	297	7.6	1	NA	NA	2	1	3	2	0	300	NA	1	0	1	1	1	0	0	1	0	1	NA	0	NA	NA	1.57	NA	NA	1.28	NA	NA
122806	2	45	5	5	1	1	166.297	84.9	30.7	101	0.798828	NA	49	NA	200	1.8	5.9	210	7	1	NA	NA	2	1	4	2	1	240	NA	1	1	1	2	1	0	1	0	0	1	NA	0	0	NA	5.99	9.77	NA	1.815	1.582	NA
83911	2	43	4	4	1	1	172.262	91.1	30.7	101.6	0.789538	42	63	78	149	1.1	2.2	320	7.7	1	NA	NA	1	1	3	2	0	360	NA	0	0	0	1	0	0	0	0	0	0	NA	0	0	NA	1.69	2.02	NA	0.923	2.681	NA
112236	2	36	4	4	1	1	164.128	82.7	30.7	97.6	0.77702	NA	44	NA	166	3.1	4.9	199	6.9	1	NA	NA	2	1	5	2	0	300	NA	0	0	0	0	0	0	0	0	0	NA	NA	18.6	64.3	NA	4.47	5.22	NA	2.08	1.108	NA
85483	2	32	3	4	3	1	148.06	67.3	30.7	90.8	0.761099	208	34	84	160	2.2	2.8	228	7.2	1	NA	NA	2	1	3	2	1	300	NA	0	0	2	0	0	0	0	0	0	0	NA	0	0	NA	1.2	3.8	NA	1.738	2.001	NA
110492	2	39	4	3	3	1	173.768	92.7	30.7	97.3	0.752839	NA	83	NA	192	2.6	5.8	339	8.1	1	NA	NA	2	1	3	2	0	240	NA	0	0	0	1	0	0	0	0	0	0	NA	84.2	37.4	NA	0.21	0.37	NA	0.589	0.838	NA
84677	2	43	4	5	3	1	166.981	85.6	30.7	95.1	0.750622	NA	52	NA	172	2	2.5	249	6.5	1	NA	NA	2	1	5	2	0	900	NA	1	0	1	2	1	0	1	0	0	1	NA	0	0	NA	1.74	1.33	NA	0.897	0.652	NA
82372	2	44	3	3	1	1	158.011	76.4	30.6	111.1	0.903421	128	47	177	250	2.2	8.9	359	6.5	0	NA	NA	1	1	3	1	0	120	NA	2	3	3	3	3	0	0	0	0	2	NA	0	0	NA	1.52	0.87	NA	1.082	1.703	NA
111846	2	23	5	4	1	1	166.765	85.1	30.6	107.9	0.85406	NA	46	NA	158	2.9	8.2	279	7.2	1	NA	NA	2	1	1	2	0	360	NA	0	0	0	1	1	0	0	0	0	0	NA	0	0	NA	2.52	2.79	NA	1.644	1.177	NA
111301	2	35	3	3	1	1	158.527	76.9	30.6	105	0.852427	143	54	128	211	2.7	5.6	435	6.6	0	NA	NA	2	1	7	1	0	420	NA	0	0	0	0	0	0	0	0	0	NA	NA	0	0	NA	3.15	7.12	NA	0.458	1.348	NA
124008	2	39	2	1	2	3	158.63	77	30.6	102.9	0.835107	208	48	135	225	1.7	3.8	256	7.1	1	NA	NA	2	1	2	2	0	120	NA	2	2	2	2	1	0	2	2	0	0	NA	0	0	NA	2.29	4.39	NA	0.521	1.294	NA
80244	2	35	3	5	1	2	169.39	87.8	30.6	105.3	0.826997	96	86	108	213	1.7	9.1	207	6	0	NA	NA	1	1	2	2	0	420	NA	0	0	1	1	0	1	0	0	0	0	NA	0	0	NA	4.73	1.13	NA	1.57	1.333	NA
83961	2	44	3	4	1	1	154.666	73.2	30.6	97.5	0.801357	NA	44	NA	192	2.3	3.6	316	6.7	1	NA	NA	2	1	3	2	0	180	NA	0	0	0	0	0	0	0	0	0	NA	NA	37.4	0	NA	4.38	2.14	NA	3.033	1.591	NA
112316	2	42	4	5	2	1	163.699	82	30.6	99.7	0.79651	NA	NA	NA	NA	NA	NA	NA	NA	1	NA	NA	2	1	1	1	0	720	NA	1	2	3	3	2	1	2	1	1	2	NA	0	0	NA	0.01	0.46	NA	0.022	0.84	NA
91734	2	36	4	4	3	1	174.24	92.9	30.6	102.6	0.794498	NA	56	NA	138	1.1	3.2	184	7.6	1	NA	NA	2	1	4	2	0	300	NA	0	1	0	1	2	1	1	0	0	1	NA	0	NA	NA	3.71	NA	NA	1.767	NA	NA
115067	2	29	4	2	1	3	173.582	92.2	30.6	102	0.791347	56	52	118	181	1.6	3.1	177	7.5	1	NA	NA	2	1	3	2	0	420	NA	1	1	2	2	3	1	0	0	0	0	NA	0	0	NA	0.81	5.86	NA	1.244	1.533	NA
109931	2	40	4	4	1	1	173.676	92.3	30.6	101.8	0.789581	91	42	100	160	1.2	1.4	251	7.2	1	NA	NA	2	1	7	2	0	600	NA	0	0	0	0	0	0	0	0	0	NA	NA	0	0	NA	1.56	3.5	NA	2.846	1.839	NA
109691	2	26	5	4	1	1	167.352	85.7	30.6	99.8	0.78856	77	56	60	131	1.6	3.3	260	6.8	1	NA	NA	2	1	1	2	0	300	NA	0	1	1	1	1	0	0	0	0	0	NA	NA	NA	NA	NA	NA	NA	NA	NA	NA
111519	2	32	2	2	2	1	152.753	71.4	30.6	94	0.777415	124	32	102	159	1.8	5.1	225	7.5	1	NA	NA	2	1	3	2	0	180	NA	1	1	0	3	1	0	0	0	0	0	NA	0	0	NA	0.88	2.47	NA	0.963	2.892	NA
118597	2	28	1	4	1	1	146.082	65.3	30.6	91.4	0.772978	83	40	68	125	1.8	4.1	215	6.9	1	NA	NA	2	1	3	2	1	180	NA	0	0	1	3	0	0	0	0	0	0	NA	0	0	NA	8.69	3.96	NA	2.276	0.526	NA
122390	2	41	4	2	2	1	171.594	90.1	30.6	98	0.764706	NA	40	NA	140	1.6	1.8	252	6.7	1	NA	NA	2	1	4	2	0	480	NA	0	0	0	0	0	0	0	0	0	NA	NA	0	0	NA	3.48	1.95	NA	2.311	3.16	NA
80645	2	22	4	3	3	1	166.448	84.5	30.5	108.5	0.861504	141	52	140	220	3.6	1.9	255	7.6	1	NA	NA	2	1	2	2	1	720	NA	1	0	0	1	3	0	0	0	0	0	NA	0	0	NA	7.47	4.01	NA	2.322	2.991	NA
90924	2	33	5	5	1	1	153.11	71.5	30.5	103	0.852712	NA	46	NA	186	2.9	9.4	217	5.9	3	NA	NA	2	1	2	1	0	360	NA	0	0	0	0	2	0	0	0	0	0	NA	0	0	NA	1.75	8.67	NA	1.765	1.61	NA
80916	2	39	3	3	1	2	180.437	99.3	30.5	111.6	0.851077	NA	71	NA	236	1.9	5.9	239	6.9	1	NA	NA	2	1	2	2	0	540	NA	0	0	0	0	0	0	0	0	0	NA	NA	159.8	93	NA	6.98	2.24	NA	1.43	1.986	NA
112469	2	45	1	1	2	1	152.681	71.1	30.5	101.5	0.841473	NA	44	NA	145	1.5	3.1	257	7.1	3	NA	NA	1	1	6	1	0	60	NA	0	0	0	0	2	0	0	0	0	0	NA	0	0	NA	1.42	1.84	NA	1.384	1.043	NA
78439	2	30	5	5	1	2	172.921	91.2	30.5	107.9	0.840552	NA	40	NA	245	3	4.1	175	6.5	1	NA	NA	2	1	1	2	0	600	NA	0	0	1	1	0	1	0	0	0	1	NA	14.9	19.8	NA	9	6.49	NA	2.189	2.41	NA
76375	2	30	3	4	3	1	151.928	70.4	30.5	100.2	0.832753	NA	48	NA	200	2.4	6.1	219	7.6	1	NA	NA	2	1	1	2	0	480	NA	0	1	1	1	0	1	0	0	0	0	NA	0	NA	NA	2.41	NA	NA	0.88	NA	NA
73633	2	43	3	5	1	1	158.683	76.8	30.5	100.3	0.815647	49	43	142	195	2.1	5	210	6.7	3	NA	NA	2	1	2	2	0	360	NA	0	0	0	1	0	0	0	0	0	0	NA	0	0	NA	3.76	2.2	NA	1.167	2.894	NA
83214	2	42	1	5	1	2	154.495	72.8	30.5	96.7	0.796958	NA	60	NA	189	3	5.9	389	6.8	1	NA	NA	2	1	7	2	0	600	NA	0	0	1	0	0	0	0	0	0	0	NA	0	NA	NA	1.56	NA	NA	0.813	NA	NA
109693	2	25	1	4	1	1	156.813	75	30.5	97	0.793502	NA	39	NA	221	2.9	4.5	293	7.8	1	NA	NA	2	1	2	1	0	240	NA	0	0	0	0	0	0	1	0	0	0	NA	0	0	NA	2.96	1.04	NA	2.091	1.358	NA
88302	2	44	4	4	3	1	162.259	80.3	30.5	98	0.788114	NA	69	NA	187	3.1	4.4	250	7	1	NA	NA	1	1	5	2	0	480	NA	0	1	1	1	0	0	0	0	0	0	NA	0	0	NA	5.82	1.06	NA	1.602	1.39	NA
79306	2	39	2	5	1	1	162.864	80.9	30.5	96.2	0.7722	NA	30	NA	272	2.1	6.8	329	7.5	1	NA	NA	2	1	3	2	0	600	NA	3	3	3	3	3	3	3	2	1	1	NA	0	0	NA	6.23	7.6	NA	1.494	4.048	NA
120106	2	30	4	3	1	3	167.038	85.1	30.5	96.9	0.768039	84	39	111	167	1.9	4.4	279	7.8	1	NA	NA	2	1	5	2	1	120	NA	0	0	0	0	0	0	0	0	0	NA	NA	0	0	NA	3.66	1.76	NA	1.092	0.282	NA
87315	2	30	5	5	1	2	162.662	80.7	30.5	95.5	0.767055	67	77	107	197	1.9	4.3	243	7.1	0	NA	NA	2	1	2	2	0	360	NA	0	1	0	2	0	0	0	0	0	0	NA	0	0	NA	14.68	12.24	NA	3.251	3.257	NA
73852	2	40	1	2	1	1	161.143	79.2	30.5	88.4	0.713366	58	60	104	176	2	5.2	278	6.7	1	NA	NA	2	1	3	2	0	300	NA	1	1	0	1	1	1	1	0	0	1	NA	9.9	NA	NA	1.31	NA	NA	0.478	NA	NA
79934	2	44	3	5	3	1	160.078	77.9	30.4	109	0.88446	105	77	148	246	2.3	4.6	255	7.5	1	NA	NA	2	1	2	2	0	240	NA	0	0	0	0	0	0	0	0	0	NA	NA	57.1	0	NA	5.14	3.94	NA	1.271	1.514	NA
84535	2	21	3	3	3	1	161.408	79.2	30.4	107	0.864646	62	46	70	128	2.9	4.1	212	7.1	3	NA	NA	2	1	2	2	0	360	NA	0	0	3	1	0	0	0	0	0	0	NA	0	0	NA	7.21	4.15	NA	1.594	0.804	NA
87906	2	22	4	4	1	1	170.526	88.4	30.4	106.9	0.840428	63	62	178	253	3.3	3.1	275	7.5	3	NA	NA	2	1	3	2	0	600	NA	0	0	1	1	0	0	0	0	0	0	NA	0	0	NA	7.26	6.12	NA	2.565	2.084	NA
91796	2	31	1	3	1	3	162.12	79.9	30.4	103.5	0.834526	NA	NA	NA	NA	NA	NA	NA	NA	0	NA	NA	2	1	3	1	1	300	NA	0	0	0	0	0	0	0	0	0	NA	NA	NA	NA	NA	NA	NA	NA	NA	NA	NA
78446	2	28	3	5	1	2	170.622	88.5	30.4	104.9	0.824472	NA	57	NA	155	2.4	4.3	268	7.1	1	NA	NA	2	1	1	2	0	480	NA	0	0	0	1	1	0	0	0	0	1	NA	0	0	NA	1.93	6.07	NA	1.579	2.259	NA
89792	2	30	1	4	1	2	155.703	73.7	30.4	98.7	0.812057	NA	41	NA	191	2.9	3.3	299	6.9	1	NA	NA	2	1	5	1	0	120	NA	0	0	0	0	0	0	0	0	0	NA	NA	0	NA	NA	3.3	NA	NA	1.137	NA	NA
76206	2	38	1	4	1	1	164.637	82.4	30.4	100.9	0.807319	80	44	96	156	2	4.4	272	7.8	1	NA	NA	2	1	3	1	1	480	NA	0	0	0	1	1	0	0	0	0	0	NA	0	0	NA	4.77	2.67	NA	1.987	1.891	NA
78128	2	24	1	2	3	1	158.01	75.9	30.4	98.6	0.80529	108	38	78	138	2.8	6.8	271	7.6	0	NA	NA	2	1	1	2	0	60	NA	0	0	0	1	0	0	1	0	0	0	NA	0	0	NA	2.34	3.44	NA	1.196	3.393	NA
123769	2	41	4	4	2	1	159.047	76.9	30.4	98.9	0.805102	NA	52	NA	167	3.3	3.6	384	7.3	1	NA	NA	2	1	2	2	0	240	NA	2	3	2	2	2	2	3	2	0	1	NA	0	0	NA	2.21	0.95	NA	1.76	1.034	NA
121851	2	29	1	5	1	2	166.82	84.6	30.4	101	0.802814	199	113	149	302	1.8	8.2	246	6	1	NA	NA	2	1	1	2	0	480	NA	0	0	0	1	0	0	0	0	0	0	NA	0	0	NA	1.77	0.92	NA	1.09	1.739	NA
80542	2	36	1	3	1	1	156.756	74.7	30.4	97.4	0.798665	171	52	93	179	2	3.4	283	6.5	1	NA	NA	2	1	3	2	1	600	NA	1	1	2	1	1	1	0	0	0	0	NA	0	0	NA	7.77	6.7	NA	1.345	2.246	NA
111692	2	38	2	2	1	1	161.204	79	30.4	98.5	0.796463	NA	60	NA	187	3.8	5.1	301	7.4	0	NA	NA	2	1	3	2	0	180	NA	0	1	0	0	0	0	0	0	0	0	NA	0	NA	NA	3.19	NA	NA	1.602	NA	NA
74942	2	44	3	5	1	1	171.391	89.3	30.4	100.9	0.791251	102	55	92	167	3	4.1	207	7.1	1	NA	NA	2	1	4	1	1	60	NA	0	0	1	1	0	0	0	0	0	0	NA	43.3	0	NA	3.75	3.23	NA	1.7	1.099	NA
82053	2	43	3	4	1	2	155.703	73.7	30.4	95.6	0.786551	120	57	89	170	1.6	6.6	242	7.1	1	NA	NA	2	1	2	2	0	600	NA	0	0	0	0	0	0	0	0	0	NA	NA	0	0	NA	4.69	3.55	NA	2.692	1.596	NA
92551	2	25	4	5	3	2	167.509	85.3	30.4	95.8	0.759914	NA	52	NA	134	3.2	5.5	419	7.4	1	NA	NA	2	1	2	2	0	480	NA	0	0	0	3	0	0	1	0	0	0	NA	14	0	NA	14.55	2.14	NA	8.566	0.618	NA
117993	2	32	3	3	1	1	158.01	75.9	30.4	92.1	0.752203	43	38	122	169	2	4.5	204	6.7	1	NA	NA	2	1	5	2	0	60	NA	2	3	3	3	2	3	3	2	1	1	NA	0	NA	NA	1.84	NA	NA	0.239	NA	NA
80289	2	37	2	4	1	3	162.93	80.7	30.4	93.1	0.748803	55	46	89	146	2.3	7.5	273	7.1	1	NA	NA	2	1	6	2	0	120	NA	0	0	0	1	1	0	0	0	0	0	NA	0	0	NA	0.73	17.32	NA	0.278	6.034	NA
80257	2	31	4	3	3	1	167.312	85.1	30.4	92	0.730199	NA	39	NA	176	3.7	4.4	280	6.8	1	NA	NA	2	1	4	2	0	480	NA	0	0	0	0	1	0	0	0	0	0	NA	18.5	0	NA	2.77	1.25	NA	1.783	2.183	NA
118205	2	44	2	2	2	1	163.897	81.5	30.34	95.7	0.768451	79	58	113	187	2.8	4.1	276	6.6	1	NA	NA	2	1	6	2	0	10	NA	1	1	1	1	0	0	0	0	1	1	NA	0	0	NA	0.52	1.16	NA	1.075	1.113	NA
80679	2	43	1	3	1	1	144.898	63.7	30.34	89.8	0.766893	NA	54	NA	199	2.8	5.3	303	6.9	3	NA	NA	2	1	3	2	0	180	NA	0	0	0	0	0	0	0	0	0	NA	NA	0	0	NA	6.51	5.64	NA	2.617	2.622	NA
109431	2	45	2	4	1	2	148.591	66.9	30.3	106.9	0.902305	NA	64	NA	203	2.2	9	199	7.4	1	NA	NA	2	1	3	2	1	180	NA	0	0	0	0	0	1	0	0	0	0	NA	8	19.1	NA	3.46	2.73	NA	1.27	1.083	NA
110984	2	44	3	5	1	2	162.184	79.7	30.3	104	0.840235	NA	77	NA	179	2.9	3.9	307	6.7	1	NA	NA	1	1	4	1	0	360	NA	0	0	1	1	0	0	1	0	0	0	NA	19	0	NA	10.06	12.2	NA	3.013	4.293	NA
80154	2	35	3	2	1	1	165.707	83.2	30.3	104.7	0.836851	107	42	103	166	1.3	2.8	167	6.8	1	NA	NA	2	1	8	1	0	180	NA	0	1	3	3	2	3	1	2	0	0	NA	0	0	NA	4.56	2.92	NA	1.362	1.334	NA
116115	2	42	4	2	1	1	168.863	86.4	30.3	102.4	0.810781	NA	NA	NA	NA	NA	NA	NA	NA	0	NA	NA	2	1	2	2	0	90	NA	0	0	0	0	0	0	0	0	0	NA	NA	0	8	NA	3.9	1.67	NA	2.484	0.814	NA
116121	2	34	4	3	3	1	157.748	75.4	30.3	97.9	0.801996	39	71	120	199	2.3	3.1	220	7.4	1	NA	NA	2	1	3	2	0	600	NA	0	0	0	0	0	0	0	0	0	NA	NA	0	NA	NA	5.52	NA	NA	1.555	NA	NA
114932	2	42	1	2	2	1	156.804	74.5	30.3	95.7	0.78633	NA	52	NA	162	2.6	3.5	218	7.6	3	NA	NA	2	1	4	2	0	120	NA	1	1	1	0	0	0	0	0	0	0	NA	0	NA	NA	5.81	NA	NA	1.901	NA	NA
113182	2	28	1	3	1	1	164.106	81.6	30.3	97.5	0.783095	182	48	119	203	2.3	8.3	288	7.7	1	NA	NA	2	1	1	2	0	480	NA	0	1	1	0	2	1	1	0	0	1	NA	0	0	NA	5.83	12.2	NA	1.671	1.754	NA
124231	2	23	4	4	3	1	163.299	80.8	30.3	96.8	0.77939	71	51	113	178	2.3	4.6	310	7.2	1	NA	NA	2	1	1	2	0	720	NA	3	0	0	3	0	0	0	0	0	0	NA	0	0	NA	2.24	2.79	NA	1.167	1.119	NA
87283	2	42	4	2	1	1	163.501	81	30.3	96.7	0.778104	NA	55	NA	159	2.9	1.8	236	7.9	3	NA	NA	2	1	4	2	0	480	NA	0	0	0	0	0	0	0	0	0	NA	NA	0	0	NA	5.91	12.71	NA	1.267	5.159	NA
124468	2	23	1	4	1	1	159.31	76.9	30.3	95.4	0.777677	NA	45	NA	228	3.1	9.1	287	7.6	1	NA	NA	2	1	2	2	0	300	NA	0	0	0	1	0	0	0	0	0	0	NA	0	0	NA	2.21	1.6	NA	0.929	1.088	NA
113769	2	36	3	2	2	1	163.602	81.1	30.3	95.7	0.76982	NA	46	NA	183	2.7	3.7	391	6.6	0	NA	NA	2	1	5	2	0	240	NA	0	0	0	0	0	0	0	0	0	NA	NA	0	0	NA	1.5	4.39	NA	1.89	2.55	NA
84579	2	27	5	5	1	2	167.095	84.6	30.3	96.6	0.768895	NA	35	NA	197	4.3	4.8	299	NA	0	NA	NA	1	1	1	2	0	240	NA	0	0	0	0	0	0	0	0	0	NA	NA	0	0	NA	3.02	3.31	NA	1.476	1.115	NA
84795	2	38	3	5	1	2	162.996	80.5	30.3	94	0.75755	57	59	152	222	1.9	3.2	279	7.2	3	NA	NA	2	1	5	1	0	240	NA	0	0	0	0	0	0	0	0	0	NA	NA	0	0	NA	9.45	5.1	NA	4.429	3.16	NA
115418	2	39	4	2	3	1	167.194	84.7	30.3	92.1	0.73286	NA	48	NA	152	2	3.4	314	7.5	3	NA	NA	2	1	7	2	1	180	NA	0	0	3	3	0	0	3	0	0	0	NA	0	11.2	NA	0.79	0.7	NA	0.955	1.271	NA
80408	2	43	4	5	2	1	168.472	86	30.3	90.1	0.714221	64	95	96	204	1.9	2.4	304	7.1	1	NA	NA	2	1	1	2	0	240	NA	0	0	0	0	0	0	0	0	0	NA	NA	0	21.9	NA	1.06	0.31	NA	1.383	1.291	NA
114984	2	31	5	5	1	1	161.532	78.8	30.2	107.2	0.869748	58	34	174	220	1.6	3	340	6.5	1	NA	NA	2	1	3	2	0	180	NA	0	0	0	0	0	0	0	0	0	NA	NA	0	0	NA	3.07	2.41	NA	0.348	0.953	NA
79847	2	43	1	5	1	1	162.044	79.3	30.2	105.3	0.852983	230	68	119	233	2.5	5.6	346	6.9	1	NA	NA	2	1	2	2	0	60	NA	0	0	0	1	0	0	0	0	0	0	NA	NA	NA	NA	NA	NA	NA	NA	NA	NA
115245	2	39	2	3	1	1	167.767	85	30.2	105.8	0.842289	NA	88	NA	226	2.5	5.6	296	7.3	1	NA	NA	2	1	1	2	0	360	NA	0	0	1	1	1	1	0	0	0	0	NA	37.2	89.2	NA	9.03	6.23	NA	8.966	1.393	NA
78355	2	34	1	4	1	1	159.573	76.9	30.2	102.7	0.838338	NA	59	NA	264	2.3	5.9	264	7	1	NA	NA	2	1	3	2	1	240	NA	0	0	3	2	1	0	0	0	0	0	NA	0	0	NA	1.33	3.25	NA	0.848	1.489	NA
124012	2	36	1	4	1	1	155.048	72.6	30.2	99.7	0.825641	NA	43	NA	202	3.2	4	327	7.3	1	NA	NA	2	1	7	2	0	240	NA	0	0	0	0	0	0	0	0	0	NA	NA	0	0	NA	3.05	4.14	NA	1.926	2.581	NA
79487	2	42	1	3	1	1	159.262	76.6	30.2	98.3	0.803206	NA	43	NA	125	2.3	4.9	288	6.6	3	NA	NA	2	1	4	2	0	360	NA	0	0	0	1	0	0	0	0	0	0	NA	0	0	NA	1.75	2.13	NA	1.286	2.114	NA
122215	2	42	5	4	1	1	154.513	72.1	30.2	96.5	0.800523	NA	52	NA	190	2.3	5.2	314	6.9	1	NA	NA	2	1	2	2	0	180	NA	0	1	0	1	0	0	0	0	0	1	NA	0	0	NA	5.52	1.21	NA	3.868	0.947	NA
77368	2	43	1	3	1	1	155.368	72.9	30.2	95.3	0.788391	NA	41	NA	206	2.4	5	316	7.2	1	NA	NA	2	1	5	2	0	300	NA	0	0	0	0	0	0	0	0	0	NA	NA	0	0	NA	6.42	13.75	NA	1.917	3.378	NA
78772	2	30	1	1	1	1	145.916	64.3	30.2	91.3	0.779379	NA	36	NA	158	2.4	6.5	270	6.8	3	NA	NA	2	1	2	2	0	480	NA	0	0	0	0	0	0	0	0	0	NA	NA	0	0	NA	3.93	2.09	NA	1.446	2.414	NA
78768	2	34	4	4	1	1	161.942	79.2	30.2	94.8	0.76817	NA	72	NA	195	2.2	2.7	273	6.6	1	NA	NA	2	1	5	2	0	660	NA	0	0	0	0	0	0	0	0	0	NA	NA	0	0	NA	3.56	4.14	NA	2	1.719	NA
83518	2	33	4	4	3	2	161.737	79	30.2	94.3	0.764602	NA	48	NA	160	1.4	7.6	244	7.4	1	NA	NA	2	1	2	2	0	540	NA	0	0	3	1	0	0	0	0	0	0	NA	0	0	NA	3.67	2.35	NA	1.561	1.528	NA
122401	2	43	5	4	2	1	165.881	83.1	30.2	92.4	0.739779	74	47	79	141	1.8	4.5	152	7	1	NA	NA	2	1	2	2	0	180	NA	1	2	3	2	2	1	1	0	0	1	NA	0	0	NA	3.05	0.79	NA	0.83	0.786	NA
124702	2	31	4	4	3	1	149.613	67.6	30.2	86.2	0.726693	55	53	117	181	1.5	2	301	6.8	1	NA	NA	2	1	2	2	0	240	NA	2	0	0	1	0	0	0	0	0	0	NA	6	3.7	NA	1.62	3.83	NA	1.166	1.415	NA
90614	2	23	3	2	1	1	151.734	69.3	30.1	97.7	0.819675	NA	72	NA	208	2.1	10.3	230	6.2	1	NA	NA	2	1	2	2	0	360	NA	0	0	1	2	1	0	0	0	0	0	NA	0	0	NA	8.03	4.15	NA	4.293	1.838	NA
115122	2	41	1	4	1	2	151.296	68.9	30.1	97.5	0.819182	NA	52	NA	167	2.2	7.7	312	6.5	1	NA	NA	2	1	6	1	0	540	NA	0	0	3	2	0	0	1	3	0	0	NA	17	NA	NA	6	NA	NA	1.44	NA	NA
78710	2	36	3	4	1	1	155.945	73.2	30.1	97.2	0.804395	NA	32	NA	279	2.9	3.5	276	6.8	1	NA	NA	2	1	2	2	0	120	NA	0	1	3	3	3	1	2	1	0	1	NA	7.4	0	NA	0.3	0.07	NA	0.165	0.021	NA
123257	2	38	3	5	2	1	158.271	75.4	30.1	97.9	0.804212	NA	42	NA	207	2.6	4	325	6.7	1	NA	NA	2	1	2	1	1	300	NA	0	0	1	1	2	1	1	0	0	0	NA	0	0	NA	4.92	3.56	NA	1.655	1.503	NA
112553	2	37	4	4	1	1	167.748	84.7	30.1	96.9	0.773185	45	60	106	175	2.4	5.9	294	7.7	1	NA	NA	2	1	5	2	0	300	NA	0	0	0	2	1	0	0	0	0	0	NA	0	50.8	NA	5.27	16.16	NA	2.489	7.015	NA
91722	2	25	3	3	3	1	170.693	87.7	30.1	96.8	0.765695	NA	61	NA	184	1.7	2.6	331	8.2	1	NA	NA	2	1	1	2	0	360	NA	1	1	2	1	1	1	0	0	1	1	NA	0	0	NA	1.78	5.91	NA	0.559	1.122	NA
89839	2	36	3	4	3	1	168.539	85.5	30.1	96	0.764206	NA	48	NA	193	2.1	6.4	218	7.1	1	NA	NA	2	1	10	2	0	60	NA	0	0	0	1	0	0	0	0	0	0	NA	NA	NA	NA	NA	NA	NA	NA	NA	NA
80667	2	33	4	4	1	1	152.171	69.7	30.1	89	0.745611	41	51	102	161	4	11.3	278	7.4	1	NA	NA	2	1	4	2	0	720	NA	0	0	1	1	2	0	0	0	0	0	NA	14	NA	NA	2.29	NA	NA	0.699	NA	NA
76218	2	36	3	5	1	2	163.536	80.5	30.1	90.7	0.732975	NA	55	NA	183	1.9	4.7	290	6.5	1	NA	NA	2	1	3	2	0	180	NA	0	0	0	1	1	0	0	0	0	0	NA	0	0	NA	2.38	5.85	NA	0.439	1.457	NA
83683	2	33	1	1	1	1	159.687	76.5	30	106.4	0.872086	89	67	75	160	2.3	4.1	256	7.3	3	NA	NA	2	1	7	1	0	60	NA	2	0	1	1	3	0	0	0	0	0	NA	0	0	NA	0.18	7.07	NA	2.002	2.756	NA
117174	2	34	3	4	1	1	171.172	87.9	30	108.2	0.85657	NA	56	NA	162	2.5	4.9	253	6.8	1	NA	NA	2	1	2	2	1	600	NA	0	0	0	0	0	0	0	0	0	NA	NA	22.3	0	NA	13.09	0.1	NA	7.707	0.037	NA
82465	2	44	5	3	1	1	150.665	68.1	30	99.9	0.842969	NA	45	NA	197	3.7	4.4	256	7.1	3	NA	NA	3	1	8	1	0	600	NA	0	0	0	0	0	0	0	0	0	NA	NA	0	0	NA	2.73	3.4	NA	1.825	2.943	NA
89892	2	42	1	1	1	1	156.205	73.2	30	101.7	0.842803	NA	33	NA	172	1.6	3.5	177	7	3	NA	NA	2	1	4	2	0	120	NA	0	0	0	1	0	0	0	0	0	0	NA	0	0	NA	3.46	5.16	NA	0.662	1.763	NA
77263	2	44	1	1	1	3	152.096	69.4	30	96.2	0.807919	NA	43	NA	228	3	5.6	265	6.6	1	NA	NA	2	1	4	1	0	480	NA	0	0	0	0	0	0	0	0	0	NA	NA	0	0	NA	2.62	5.54	NA	1.904	2.121	NA
75224	2	27	4	2	3	1	161.245	78	30	97.5	0.795268	88	62	113	193	2.8	2.9	176	6.5	3	NA	NA	2	1	1	2	0	480	NA	0	0	0	0	0	0	0	0	0	NA	NA	0	0	NA	3.92	7.04	NA	1.161	2.753	NA
119646	2	36	3	4	1	1	166.733	83.4	30	97.1	0.778862	170	47	83	164	2.3	2.9	269	7.2	1	NA	NA	2	1	3	2	0	180	NA	0	0	1	0	0	0	0	0	0	0	NA	17.7	0	NA	4.67	0.62	NA	2.193	2.565	NA
109502	2	29	1	4	1	1	162.378	79.1	30	95.6	0.777046	NA	45	NA	164	3.6	4.8	220	6.7	1	NA	NA	2	1	1	1	1	180	NA	0	0	0	1	0	0	0	1	0	0	NA	0	30.2	NA	4.46	7.25	NA	3.281	3.644	NA
91536	2	37	5	4	1	1	162.07	78.8	30	94.8	0.771276	NA	50	NA	214	2	4.3	329	7.2	1	NA	NA	2	1	1	2	1	300	NA	0	0	1	2	0	0	0	0	0	0	NA	0	0	NA	1.52	2.94	NA	0.648	1.879	NA
121950	2	41	2	4	1	2	158.114	75	30	93.6	0.77098	47	63	85	157	1.1	5.4	263	6.7	1	NA	NA	2	1	3	2	0	120	NA	0	0	1	0	2	0	2	0	0	0	NA	0	0	NA	2.74	3.67	NA	1.686	2.28	NA
87005	2	31	1	4	1	1	158.43	75.3	30	92.4	0.760337	NA	32	NA	173	3.5	5.9	304	7.6	1	NA	NA	2	1	2	2	0	240	NA	0	0	0	0	0	0	0	0	0	NA	NA	0	0	NA	4.32	1.57	NA	1.88	1.586	NA
114048	2	30	3	5	1	1	161.761	78.5	30	91.7	0.746766	49	54	77	141	1.5	2.9	188	6.6	0	NA	NA	2	1	1	2	0	360	NA	0	0	1	1	0	0	0	0	0	0	NA	0	0	NA	8.91	2.16	NA	2.614	0.466	NA
80637	2	36	1	5	1	1	153.406	70.6	30	84.8	0.709133	NA	NA	NA	NA	NA	NA	NA	NA	1	NA	NA	2	1	3	2	0	360	NA	0	0	0	0	0	0	0	0	0	NA	NA	11.2	NA	NA	2.66	NA	NA	1.142	NA	NA
88261	2	31	2	3	1	1	162.238	78.7	29.9	109	0.888321	101	57	102	179	3	5.3	308	8.2	3	NA	NA	2	1	2	2	0	60	NA	1	1	3	3	1	0	0	0	0	0	NA	0	0	NA	0.44	4.01	NA	0.739	1.834	NA
93106	2	40	2	3	3	1	147.101	64.7	29.9	99.2	0.849029	202	52	165	257	1.5	3.6	263	6.1	3	NA	NA	2	1	4	2	1	120	NA	1	0	1	1	1	1	1	0	0	0	NA	0	NA	NA	4.42	NA	NA	1.988	NA	NA
80497	2	37	1	2	2	1	153.662	70.6	29.9	97.9	0.81982	192	60	107	205	1.8	9.2	299	7.3	3	NA	NA	2	1	7	2	0	300	NA	3	3	3	3	3	3	3	3	3	3	NA	0	0	NA	0.92	2.44	NA	0.685	0.522	NA
86436	2	30	3	5	1	1	170.578	87	29.9	102.6	0.815464	194	47	110	196	2	3.7	259	7.5	1	NA	NA	2	1	5	2	0	180	NA	0	0	0	2	2	0	0	0	0	0	NA	28.1	0	NA	2.94	3.67	NA	1.509	0.951	NA
80339	2	37	1	3	1	1	159.64	76.2	29.9	98.5	0.809253	NA	41	NA	184	3.1	4.8	336	8.9	3	NA	NA	2	1	1	2	0	240	NA	0	0	0	0	0	0	0	0	0	NA	NA	0	0	NA	2.2	1.7	NA	0.671	1.238	NA
81666	2	37	3	4	1	3	168.705	85.1	29.9	100.3	0.801596	NA	33	NA	124	2.6	3.8	396	6.8	1	NA	NA	2	1	3	2	0	960	NA	0	0	0	3	0	0	0	0	0	0	NA	18.7	0	NA	3.48	1.86	NA	0.778	1.079	NA
91336	2	25	3	4	3	1	163.879	80.3	29.9	98.2	0.796287	NA	41	NA	113	1.5	4.5	168	7.2	1	NA	NA	2	1	3	1	0	180	NA	0	0	0	0	0	0	0	0	0	NA	NA	0	0	NA	4.34	4.72	NA	1.372	0.87	NA
112306	2	21	4	3	3	1	169.398	85.8	29.9	99	0.789588	NA	NA	NA	NA	NA	NA	NA	NA	1	NA	NA	2	1	2	2	0	120	NA	0	0	0	0	0	0	0	0	0	NA	NA	0	0	NA	0.56	2.66	NA	0.378	1.308	NA
120104	2	38	1	5	3	1	156.786	73.5	29.9	94.8	0.785911	NA	55	NA	246	2.3	4.3	262	7.3	1	NA	NA	2	1	2	2	0	420	NA	1	1	0	1	2	1	0	0	0	1	NA	28.1	14	NA	6.72	2.21	NA	2.176	2.233	NA
81882	2	36	2	3	1	1	157.849	74.5	29.9	94.2	0.778303	NA	39	NA	156	2.7	4.1	252	7	1	NA	NA	2	1	2	2	0	240	NA	0	0	0	0	0	0	0	0	0	NA	NA	0	0	NA	2.58	1.19	NA	1.976	2.063	NA
121763	2	42	3	5	2	1	158.905	75.5	29.9	94	0.774066	NA	45	NA	226	2.5	5.1	281	6.7	1	NA	NA	2	1	5	1	0	180	NA	0	0	0	2	0	0	0	0	0	0	NA	28.1	NA	NA	1.52	NA	NA	1.05	NA	NA
78586	2	41	4	4	3	1	155.716	72.5	29.9	92	0.765315	NA	56	NA	240	1.6	3.9	212	7.5	1	NA	NA	2	1	1	2	1	600	NA	0	1	2	1	0	1	1	0	0	0	NA	0	13.8	NA	3.42	0.73	NA	0.785	0.665	NA
84363	2	36	1	1	1	1	152.789	69.8	29.9	86.3	0.724743	102	46	107	173	1.8	4.9	215	7	1	NA	NA	2	1	2	2	1	60	NA	0	0	0	0	0	0	0	0	0	NA	NA	0	0	NA	3.44	1.04	NA	2	2.3	NA
75776	2	21	3	4	1	1	167.392	83.5	29.8	111.9	0.899812	NA	77	NA	301	1.2	6.4	256	6.5	3	NA	NA	2	1	1	2	0	480	NA	0	0	2	3	0	0	0	0	0	1	NA	0	0	NA	4.11	3.54	NA	2.597	1.267	NA
92542	2	36	3	5	1	2	168.988	85.1	29.8	110.7	0.885948	NA	66	NA	196	NA	NA	NA	7.2	1	NA	NA	2	1	3	2	0	420	NA	0	0	1	0	0	0	0	0	0	0	NA	85	0	NA	3.07	2.4	NA	1.666	1.063	NA
89359	2	30	3	4	1	1	143.658	61.5	29.8	102	0.88537	80	49	70	135	1.7	3.1	276	7.5	3	NA	NA	2	1	4	2	0	360	NA	0	0	0	0	0	0	0	0	0	NA	NA	0	0	NA	2.92	3.8	NA	0.885	1.016	NA
77236	2	44	3	4	1	1	162.406	78.6	29.8	99.8	0.814738	65	53	99	165	1.7	4.9	218	6.9	1	NA	NA	2	1	3	2	0	600	NA	0	0	0	0	0	0	0	0	0	NA	NA	0	0	NA	1.2	10.44	NA	1.551	3.309	NA
114640	2	33	3	5	1	2	168.491	84.6	29.8	101.1	0.810311	NA	84	NA	343	1.4	8.8	147	6.3	1	NA	NA	2	1	1	2	1	300	NA	0	0	0	1	0	0	0	0	0	0	NA	0	0	NA	2.81	3.63	NA	0.813	1.252	NA
87800	2	36	1	1	1	3	147.462	64.8	29.8	94.1	0.806193	NA	28	NA	192	2.4	4.9	244	7.4	0	NA	NA	2	1	3	1	0	180	NA	0	0	0	0	0	0	0	0	0	NA	NA	0	0	NA	0.14	5.72	NA	0.352	2.143	NA
79380	2	24	3	4	1	2	160.954	77.2	29.8	97.8	0.802006	NA	62	NA	200	1.9	8.6	220	6.1	0	NA	NA	2	1	1	2	0	180	NA	0	0	0	1	1	1	0	0	0	0	NA	0	0	NA	2.39	3.27	NA	1.264	1.75	NA
75425	2	34	1	5	1	1	157.582	74	29.8	96.7	0.801423	NA	50	NA	183	2.4	4.7	294	7.8	1	NA	NA	2	1	4	2	0	300	NA	0	0	0	2	1	0	0	0	0	0	NA	46.5	0	NA	3.96	8.15	NA	2.682	3.591	NA
82309	2	23	3	3	3	1	164.969	81.1	29.8	96.1	0.778415	NA	NA	NA	NA	NA	NA	NA	NA	1	NA	NA	2	1	1	2	0	900	NA	1	0	2	3	0	1	0	0	0	0	NA	0	NA	NA	3.01	NA	NA	0.591	NA	NA
84837	2	45	1	2	1	1	155.762	72.3	29.8	92.4	0.770248	NA	53	NA	197	2.7	4.1	254	6.8	3	NA	NA	2	1	6	2	0	120	NA	1	0	1	1	3	0	1	0	0	0	NA	0	0	NA	2.24	2.94	NA	1.147	1.851	NA
120262	2	40	4	3	1	3	153.592	70.3	29.8	91	0.763916	NA	57	NA	190	3.3	3.7	259	7.5	1	NA	NA	2	1	3	2	0	120	NA	1	0	0	0	0	0	0	0	0	0	NA	NA	NA	NA	NA	NA	NA	NA	NA	NA
112773	2	42	1	4	1	1	163.025	79.2	29.8	93.7	0.763487	NA	99	NA	224	1.2	4.9	325	7.1	1	NA	NA	2	1	5	2	0	360	NA	0	0	1	1	1	0	0	0	0	0	NA	37	0	NA	2.45	1.71	NA	1.746	2.106	NA
88892	2	27	4	3	1	1	166.185	82.3	29.8	93.6	0.755386	NA	38	NA	142	2.7	6.1	274	7.3	1	NA	NA	2	1	1	2	0	360	NA	0	1	0	0	0	0	0	0	0	0	NA	0	0	NA	0.78	3.79	NA	3.209	0.568	NA
124514	2	36	4	5	1	1	167.893	84	29.8	92.1	0.739491	107	46	170	237	1.5	2.5	262	7.5	0	NA	NA	2	1	3	2	1	120	NA	0	0	0	1	0	0	0	0	0	0	NA	0	26.8	NA	2.83	19.41	NA	0.96	7.196	NA
77664	2	30	5	4	3	1	164.765	80.9	29.8	87.3	0.707572	NA	55	NA	274	3.3	4	210	6.7	1	NA	NA	2	1	6	2	0	780	NA	0	0	1	1	0	0	0	0	0	0	NA	0	0	NA	8.79	1.63	NA	2.167	3.424	NA
123551	2	21	4	3	3	1	156.777	73	29.7	104.2	0.867738	53	51	112	174	2.2	2.1	310	7.3	3	NA	NA	2	1	1	1	0	600	NA	0	0	0	0	0	0	0	0	0	NA	NA	0	0	NA	4.2	1.5	NA	2.003	0.351	NA
110576	2	37	3	3	1	2	160.492	76.5	29.7	101.5	0.835415	152	55	87	172	2.3	3.7	259	6.3	1	NA	NA	2	1	4	2	0	300	NA	0	0	0	2	1	0	0	0	0	0	NA	0	NA	NA	2.85	NA	NA	1.43	NA	NA
82650	2	43	4	5	1	1	164.634	80.5	29.7	101.5	0.824838	NA	64	NA	265	2.1	4.8	306	6.3	1	NA	NA	2	1	2	2	0	240	NA	0	0	0	1	0	0	0	0	0	0	NA	0	0	NA	1.67	1.36	NA	0.595	0.977	NA
79291	2	35	3	4	3	1	173.011	88.9	29.7	102.8	0.814928	NA	31	NA	239	1.9	6.1	235	6.9	3	NA	NA	1	1	2	1	0	600	NA	0	0	3	3	0	0	0	0	0	1	NA	0	0	NA	0.15	4.16	NA	0.052	1.433	NA
88572	2	34	2	3	1	1	158.804	74.9	29.7	96.2	0.795987	109	36	68	126	1.7	4.9	212	7.2	1	NA	NA	2	1	3	2	0	600	NA	0	0	0	0	0	0	0	0	0	NA	NA	0	0	NA	2.05	10.86	NA	1.547	3.595	NA
84238	2	25	4	3	3	1	162.161	78.1	29.7	97.2	0.795894	NA	63	NA	170	2.4	2	187	7.2	1	NA	NA	2	1	1	2	0	240	NA	2	2	2	1	1	0	0	1	0	0	NA	0	0	NA	2.5	4.61	NA	1.427	2.403	NA
85390	2	23	1	3	3	1	162.369	78.3	29.7	97.2	0.795385	NA	76	NA	169	2.7	5.2	290	6.8	1	NA	NA	2	1	1	2	1	600	NA	0	1	1	1	1	1	0	1	0	0	NA	125	27.7	NA	7.71	1.05	NA	6.643	1.841	NA
122004	2	40	3	3	1	1	151.202	67.9	29.7	93.4	0.79201	105	39	100	160	3	12	305	7.5	1	NA	NA	2	1	3	2	0	720	NA	0	0	0	0	0	0	0	0	0	NA	NA	0	0	NA	0.98	0.56	NA	0.821	0.581	NA
88932	2	38	2	4	1	1	156.503	72.5	29.6	103.7	0.866276	NA	70	NA	221	3.2	3.9	218	7.6	1	NA	NA	2	1	6	2	0	480	NA	0	0	1	0	1	0	0	0	0	0	NA	0	19.2	NA	4.94	7.94	NA	1.592	1.718	NA
90767	2	40	1	3	1	1	153.891	70.1	29.6	101	0.850851	NA	42	NA	196	3	5.5	347	7.9	1	NA	NA	2	1	4	2	0	180	NA	2	1	1	2	1	1	0	2	1	1	NA	0	0	NA	2.04	0.67	NA	1.21	0.423	NA
117409	2	34	1	4	1	1	157.686	73.6	29.6	101.7	0.846376	66	47	129	189	2.4	3.3	283	6.6	1	NA	NA	2	1	5	2	0	120	NA	0	0	0	0	1	0	0	1	0	1	NA	0	0	NA	0.54	3.68	NA	0.789	2.13	NA
79379	2	43	1	2	1	1	156.071	72.1	29.6	98	0.819793	NA	56	NA	155	3	4.7	331	6.6	1	NA	NA	2	1	5	2	0	480	NA	1	1	0	1	0	0	0	0	0	0	NA	0	0	NA	2.53	4.52	NA	1.455	2.028	NA
85994	2	43	1	5	1	2	162.227	77.9	29.6	98	0.804088	52	66	157	233	1.9	3.4	244	7.5	1	NA	NA	2	1	4	2	1	360	NA	0	0	0	0	0	0	0	0	0	NA	NA	0	0	NA	4.44	6.78	NA	2.21	1.421	NA
123511	2	35	3	5	3	1	160.131	75.9	29.6	96.6	0.797771	NA	51	NA	242	3	4.3	344	7.3	1	NA	NA	2	1	1	2	0	720	NA	0	0	0	1	0	0	0	0	0	1	NA	29.3	0	NA	3.15	1.6	NA	2.007	2.243	NA
77121	2	42	3	5	3	2	176.49	92.2	29.6	101.1	0.795299	NA	71	NA	230	2.7	5.4	334	7.2	1	NA	NA	2	1	4	2	0	480	NA	1	1	0	1	1	1	1	0	1	1	NA	0	0	NA	5.26	7.15	NA	1.82	2.719	NA
117351	2	32	3	3	3	3	157.149	73.1	29.6	95.1	0.792799	NA	NA	NA	NA	2.4	3.5	276	NA	1	NA	NA	2	1	4	2	0	240	NA	0	0	3	2	0	0	0	0	0	0	NA	28.8	0	NA	2.05	1.84	NA	0.322	0.464	NA
93556	2	21	4	3	3	1	169.658	85.2	29.6	98.1	0.787084	NA	68	NA	208	2.9	3.6	226	7.9	1	NA	NA	2	1	3	2	0	360	NA	0	0	0	0	0	0	0	0	0	NA	NA	0	0	NA	7.17	6.51	NA	1.969	2.559	NA
111191	2	41	2	4	1	2	151.68	68.1	29.6	92.1	0.78151	NA	56	NA	220	2.2	4.9	313	7	1	NA	NA	2	1	4	2	0	300	NA	0	2	0	0	0	0	0	0	0	0	NA	NA	NA	NA	NA	NA	NA	NA	NA	NA
80654	2	30	1	5	3	1	147.387	64.3	29.6	90	0.774732	NA	65	NA	237	2.4	6.1	209	6.9	1	NA	NA	2	1	2	2	0	360	NA	0	1	0	1	1	0	1	0	0	0	NA	37.4	0	NA	3.14	1.36	NA	1.672	0.741	NA
91771	2	39	1	1	1	1	158.754	74.6	29.6	92.9	0.770536	122	43	110	177	2.8	6.4	413	7.3	1	NA	NA	1	1	4	1	0	120	NA	1	0	1	1	1	0	0	0	0	0	NA	0	0	NA	3.35	0.98	NA	1.178	0.43	NA
122581	2	31	4	5	1	2	159.285	75.1	29.6	92	0.761798	NA	64	NA	152	2.4	5.2	282	7.1	1	NA	NA	2	1	3	2	0	420	NA	0	0	0	1	0	0	0	0	0	0	NA	55.7	0	NA	6.6	0.42	NA	1.945	0.384	NA
116615	2	34	4	3	2	1	157.686	73.6	29.6	82.5	0.686588	NA	NA	NA	NA	NA	NA	NA	NA	1	NA	NA	2	1	4	2	0	300	NA	0	0	0	1	0	0	0	0	0	0	NA	0	NA	NA	0.37	NA	NA	1.02	NA	NA
87640	2	37	2	3	3	1	159.979	75.5	29.5	105	0.869514	156	40	94	165	2.6	3	221	7.6	3	NA	NA	2	1	4	2	0	600	NA	0	0	0	0	0	0	0	0	0	NA	NA	0	0	NA	3.24	1.8	NA	0.851	1.797	NA
112161	2	45	4	2	2	1	154.261	70.2	29.5	98.9	0.834039	44	58	112	179	1.2	1.2	198	7.3	3	NA	NA	2	1	5	2	0	300	NA	0	0	0	0	0	0	0	0	0	NA	NA	0	0	NA	5.93	0.92	NA	1.894	0.455	NA
116454	2	31	4	3	1	3	166.214	81.5	29.5	101.2	0.822177	28	55	83	144	1.8	3.7	188	7.3	1	NA	NA	2	1	2	2	0	600	NA	0	0	0	0	0	0	0	0	0	NA	NA	0	0	NA	4.57	1.86	NA	1.579	1.593	NA
118040	2	36	4	2	1	1	156.335	72.1	29.5	96.6	0.809222	78	34	118	168	1.5	2.4	262	7.5	0	NA	NA	2	1	2	2	0	360	NA	3	0	3	3	3	0	0	0	0	0	NA	0	0	NA	3.48	3.37	NA	2.275	0.755	NA
115923	2	31	5	5	1	1	155.683	71.5	29.5	96	0.805877	121	41	109	174	2.1	5.3	342	7.7	3	NA	NA	2	1	2	2	1	600	NA	0	0	0	0	0	0	0	0	0	NA	NA	0	0	NA	11.22	4.34	NA	2.846	2.397	NA
86618	2	34	5	5	1	1	155.465	71.3	29.5	93.7	0.787121	NA	27	NA	210	2.4	5.4	174	7.1	3	NA	NA	2	1	4	2	0	360	NA	0	0	0	0	0	0	0	0	0	NA	NA	0	0	NA	0.87	0.5	NA	1.259	1.126	NA
122420	2	37	2	2	3	3	152.826	68.9	29.5	90.9	0.770164	NA	NA	NA	NA	2.3	3.3	373	NA	1	NA	NA	1	1	3	2	0	60	NA	0	0	0	0	0	0	0	0	0	NA	NA	0	0	NA	2.29	0.69	NA	1.95	1.17	NA
90369	2	40	4	4	3	1	163.334	78.7	29.5	92.4	0.757273	41	77	81	166	2.6	2.4	197	6.6	1	NA	NA	2	1	5	2	0	600	NA	0	0	0	1	0	0	2	0	0	0	NA	0	0	NA	1.7	5.87	NA	2.332	6.892	NA
120025	2	36	1	5	1	1	156.01	71.8	29.5	90.2	0.756397	37	59	134	200	1.6	4.1	223	6.5	1	NA	NA	2	1	3	1	0	180	NA	0	0	1	1	0	0	0	0	0	0	NA	0	0	NA	2.33	2.17	NA	1.12	1.446	NA
76296	2	33	5	5	1	2	166.214	81.5	29.5	93	0.755558	NA	42	NA	186	2.6	4.5	311	7.2	1	NA	NA	2	1	2	2	0	360	NA	0	0	0	0	0	0	0	0	0	NA	NA	0	0	NA	1.17	1.3	NA	1.145	1.094	NA
81528	2	41	5	3	1	1	149.122	65.6	29.5	87.8	0.753083	NA	32	NA	161	2.2	3.1	149	7.2	1	NA	NA	2	1	8	1	0	240	NA	0	1	3	1	3	0	0	2	0	1	NA	0	0	NA	0.51	7.96	NA	0.196	1.14	NA
111666	2	41	4	4	2	1	159.129	74.7	29.5	90.6	0.752267	NA	39	NA	212	3.9	3.2	355	7.5	1	NA	NA	2	1	3	2	0	180	NA	2	2	1	1	0	1	0	0	0	1	NA	35.9	0	NA	1.05	0.83	NA	0.259	1.339	NA
86364	2	42	3	3	1	1	158.916	74.5	29.5	89.7	0.745294	NA	53	NA	181	2.8	5.8	235	6.8	1	NA	NA	2	1	3	2	0	720	NA	0	1	2	1	3	1	1	0	0	0	NA	73	0	NA	3.56	2.53	NA	2.212	1.008	NA
119481	2	36	3	3	1	1	148.576	64.9	29.4	100.6	0.866414	NA	NA	NA	NA	2.8	3.6	206	NA	1	NA	NA	2	1	4	2	0	600	NA	1	1	2	3	3	1	0	0	0	1	NA	24.6	0	NA	3.96	5.96	NA	1.766	1.775	NA
120296	2	42	2	1	1	3	161.308	76.5	29.4	101.6	0.839783	NA	43	NA	191	2.1	4.3	303	7.3	0	NA	NA	2	1	6	2	0	120	NA	0	0	0	0	0	0	0	0	0	NA	NA	0	NA	NA	4.74	NA	NA	2.327	NA	NA
115023	2	35	3	3	1	1	168.022	83	29.4	103.5	0.838223	NA	45	NA	196	3.2	7.4	381	6.8	0	NA	NA	2	1	3	2	1	120	NA	0	0	0	0	0	0	0	0	0	NA	NA	0	0	NA	6.86	6.92	NA	2.145	3.932	NA
79972	2	34	5	4	3	1	156.275	71.8	29.4	97.2	0.816251	138	62	75	165	2	3.7	339	6.8	1	NA	NA	2	1	4	2	0	480	NA	1	0	1	1	1	0	1	0	0	0	NA	0	24.7	NA	1.79	2.69	NA	0.332	0.944	NA
74259	2	39	2	4	1	1	146.385	63	29.4	92.2	0.79999	NA	44	NA	179	3.8	5.3	283	7.7	3	NA	NA	2	1	1	1	0	480	NA	0	0	0	0	0	0	0	0	0	NA	NA	0	0	NA	4.56	4.36	NA	2.203	0.943	NA
87318	2	30	4	5	3	1	167.413	82.4	29.4	97.9	0.794309	28	47	75	128	2.3	2.5	237	7.1	1	NA	NA	2	1	3	2	0	600	NA	0	0	0	1	1	0	0	0	0	0	NA	44.8	0	NA	1.28	5.54	NA	0.811	2.891	NA
123364	2	42	1	4	1	3	157.683	73.1	29.4	93.8	0.784173	68	53	106	173	3	3.2	302	6.8	1	NA	NA	2	1	3	2	0	180	NA	0	0	0	1	0	1	1	0	0	0	NA	9.9	NA	NA	4.09	NA	NA	1.162	NA	NA
114595	2	25	5	4	1	1	158.329	73.7	29.4	91.4	0.762549	NA	42	NA	148	3	9	232	7	1	NA	NA	2	1	5	3	0	120	NA	1	1	2	2	2	1	1	0	0	2	NA	NA	NA	NA	NA	NA	NA	NA	NA	NA
80954	2	29	4	4	3	1	172.713	87.7	29.4	93.6	0.747678	49	43	96	149	1.6	3.3	243	6.9	1	NA	NA	2	1	8	2	0	360	NA	0	0	0	0	0	0	0	0	0	NA	NA	12.3	0	NA	2.98	0.97	NA	2.836	0.663	NA
85173	2	45	2	1	2	1	153.308	69.1	29.4	87.3	0.740173	89	47	180	245	2.7	3.7	151	6.8	0	NA	NA	2	1	9	2	0	480	NA	1	1	0	1	0	1	1	0	0	0	NA	0	NA	NA	1.79	NA	NA	1.063	NA	NA
113505	2	29	4	5	1	1	166.087	81.1	29.4	90.7	0.738823	NA	39	NA	126	4	2.2	390	7.1	0	NA	NA	2	1	3	2	0	240	NA	1	2	0	1	1	1	1	0	0	0	NA	0	0	NA	0.88	0.5	NA	1.147	1.054	NA
83647	2	20	3	3	3	1	157.411	72.6	29.3	103.8	0.870499	NA	77	NA	209	2.9	12.7	235	6.2	0	NA	NA	2	1	4	2	0	45	NA	1	1	3	2	0	0	0	1	0	1	NA	0	0	NA	11.27	4.44	NA	4.369	2.942	NA
121634	2	42	3	3	1	1	164.306	79.1	29.3	102.9	0.844649	NA	44	NA	167	1.5	5.3	195	7.3	1	NA	NA	2	1	4	2	0	240	NA	0	0	0	0	0	0	0	0	0	NA	NA	0	0	NA	3.58	16.96	NA	1.144	2.081	NA
87896	2	32	4	3	3	1	156.541	71.8	29.3	100	0.840957	NA	NA	NA	NA	NA	NA	NA	NA	3	NA	NA	2	1	3	2	0	480	NA	0	0	0	0	0	0	0	0	0	NA	NA	0	0	NA	4.54	3.18	NA	2.43	1.825	NA
80287	2	21	3	3	1	1	157.736	72.9	29.3	99.4	0.83274	59	62	124	198	1.7	3.8	314	6.9	3	NA	NA	2	1	1	2	0	540	NA	0	0	0	0	0	0	0	0	0	NA	NA	0	0	NA	5.17	4.67	NA	1.078	2.894	NA
109322	2	45	1	2	1	1	146.402	62.8	29.3	94.6	0.822633	69	58	101	173	1.8	4.7	244	6.9	3	NA	NA	2	1	2	2	0	150	NA	0	0	0	0	0	0	0	0	0	NA	NA	0	0	NA	1.55	0.66	NA	1.912	1.425	NA
111149	2	43	4	4	3	1	159.029	74.1	29.3	98.2	0.819336	NA	72	NA	120	NA	NA	403	7	1	NA	NA	2	1	1	2	0	120	NA	3	0	1	1	1	0	0	0	0	1	NA	0	0	NA	0.92	4.13	NA	1.794	2.122	NA
76597	2	41	3	4	1	1	165.032	79.8	29.3	98.5	0.806753	63	51	86	150	1.8	3.2	184	7.5	1	NA	NA	2	1	2	2	1	720	NA	0	0	0	0	0	0	0	0	0	NA	NA	0	0	NA	8.05	1.87	NA	2.892	3.481	NA
81374	2	43	3	4	1	1	163.055	77.9	29.3	97.4	0.802564	54	90	169	270	1.7	3.6	295	7.1	1	NA	NA	2	1	2	2	0	720	NA	1	0	0	0	1	0	1	0	0	0	NA	0	0	NA	3.34	2.56	NA	2.371	0.998	NA
112960	2	38	1	4	1	1	153.792	69.3	29.3	94.5	0.801777	120	46	87	157	2.3	6.1	346	7.2	1	NA	NA	2	1	2	1	0	180	NA	0	0	0	2	0	0	0	0	0	0	NA	0	0	NA	2.57	6.91	NA	0.47	3.1	NA
92767	2	41	1	1	1	1	153.124	68.7	29.3	93.5	0.795019	NA	53	NA	234	2	4.4	259	7.3	1	NA	NA	2	1	3	2	0	120	NA	0	0	0	0	0	0	0	0	0	NA	NA	11.2	0	NA	3.09	5.4	NA	2.499	1.664	NA
93428	2	30	1	1	3	1	149.858	65.8	29.3	90.9	0.781291	101	52	88	160	1.7	3.5	264	8	3	NA	NA	2	1	3	2	0	10	NA	0	2	2	2	2	0	2	0	0	0	NA	0	0	NA	2.11	1.34	NA	1.938	1.071	NA
93115	2	28	1	2	1	1	161.055	76	29.3	94.1	0.780174	96	73	71	163	2.8	2.2	116	6.5	3	NA	NA	2	1	4	2	0	120	NA	1	1	1	1	1	0	0	0	0	1	NA	0	0	NA	3.73	1.37	NA	1.189	1.619	NA
112605	2	35	2	2	1	1	155.337	70.7	29.3	90.2	0.761477	NA	38	NA	145	2.8	5.5	362	6.9	0	NA	NA	3	1	4	2	0	180	NA	0	0	0	0	0	0	0	0	0	NA	NA	0	0	NA	3.08	4.38	NA	0.807	1.477	NA
118284	2	43	2	4	1	1	167.087	81.8	29.3	92.8	0.755379	260	35	118	205	2.8	8.7	319	7.5	1	NA	NA	2	1	3	1	0	180	NA	1	1	2	1	1	1	3	2	0	1	NA	0	11.2	NA	0.43	1.99	NA	3.045	2.141	NA
123519	2	44	5	4	2	1	161.33	76	29.2	101.8	0.845217	150	55	110	195	3.4	7.2	320	7.3	1	NA	NA	2	1	3	2	0	480	NA	0	2	3	2	2	3	2	0	0	1	NA	59.5	44.6	NA	4.16	4.82	NA	2.543	1.579	NA
78952	2	44	5	4	1	2	164.691	79.2	29.2	102	0.83819	322	33	101	198	2.2	5.1	286	6.6	3	NA	NA	1	1	3	1	0	180	NA	0	0	0	0	0	0	0	0	0	NA	NA	0	0	NA	0.47	1.27	NA	0.713	1.259	NA
87276	2	44	1	3	1	1	155.933	71	29.2	99.2	0.837762	NA	63	NA	211	2.6	3.2	260	6.4	3	NA	NA	2	1	7	2	0	540	NA	0	0	0	0	0	0	0	0	0	NA	NA	0	0	NA	10.89	8.79	NA	2.795	3.449	NA
74596	2	45	4	3	3	1	162.283	76.9	29.2	101	0.83611	67	59	99	171	0.8	3.7	245	6.3	1	NA	NA	2	1	5	2	0	540	NA	0	1	0	1	1	0	1	0	0	0	NA	0	0	NA	3.89	2.1	NA	1.68	1.442	NA
119668	2	38	3	3	1	1	164.691	79.2	29.2	99.2	0.815181	NA	50	NA	185	2.5	7.1	379	7.9	1	NA	NA	2	1	3	2	0	300	NA	0	0	0	0	0	0	0	0	0	NA	NA	0	0	NA	2.75	2.48	NA	0.874	2.625	NA
79057	2	35	1	1	1	1	153.051	68.4	29.2	93.3	0.795319	NA	50	NA	194	2.2	3.4	291	6.7	1	NA	NA	2	1	2	2	0	180	NA	0	0	3	0	1	0	0	0	0	0	NA	0	NA	NA	3.89	NA	NA	1.152	NA	NA
109700	2	42	2	5	1	1	161.436	76.1	29.2	95.8	0.795139	NA	50	NA	158	0.6	2.9	162	6.4	1	NA	NA	2	1	3	2	1	300	NA	0	0	0	1	0	0	0	0	0	0	NA	0	0	NA	2.76	3.43	NA	1.426	1.697	NA
78823	2	38	3	2	3	1	162.599	77.2	29.2	95	0.785675	239	33	91	172	3	6.5	260	7.1	1	NA	NA	2	1	2	2	0	240	NA	0	0	0	0	0	0	0	0	0	NA	NA	NA	NA	NA	NA	NA	NA	NA	NA	NA
82312	2	33	3	4	3	1	153.051	68.4	29.2	92	0.784238	NA	36	NA	172	2.7	6.3	210	7.1	1	NA	NA	2	1	1	2	0	600	NA	0	0	0	2	1	0	0	0	0	0	NA	0	0	NA	8.82	1.18	NA	3.455	1.626	NA
113113	2	41	5	3	1	1	153.721	69	29.2	90.1	0.766366	219	49	158	251	2.1	3.8	153	7	3	NA	NA	2	1	2	2	0	120	NA	0	1	1	0	0	1	0	0	0	0	NA	NA	NA	NA	NA	NA	NA	NA	NA	NA
123773	2	26	4	3	1	1	164.171	78.7	29.2	88.8	0.730875	NA	51	NA	204	2.2	5.4	274	7.2	1	NA	NA	2	1	4	2	0	240	NA	0	0	1	1	0	0	0	0	0	0	NA	0	0	NA	4.56	0.5	NA	1.842	0.839	NA
89031	2	41	5	4	1	1	162.071	76.7	29.2	84.1	0.69666	NA	78	NA	172	2	4	265	6.9	1	NA	NA	2	1	7	2	0	120	NA	0	0	0	0	1	0	0	0	0	0	NA	0	0	NA	4.99	11.68	NA	1.687	4.412	NA
86395	2	36	3	4	3	1	172.509	86.6	29.1	113.5	0.9134	152	58	141	229	2	8	317	6.4	1	NA	NA	2	1	5	2	0	720	NA	2	3	3	3	2	3	0	0	0	1	NA	0	NA	NA	2.8	NA	NA	1.459	NA	NA
84924	2	28	3	5	1	1	163.615	77.9	29.1	110.2	0.91063	NA	70	NA	189	1.8	10	135	5.7	1	NA	NA	2	1	2	2	0	180	NA	0	0	0	0	0	0	0	0	0	NA	NA	0	0	NA	2.43	4.11	NA	1.735	1.879	NA
115702	2	39	1	2	3	3	168.987	83.1	29.1	105.7	0.859447	NA	41	NA	244	2.2	5.2	326	7.4	1	NA	NA	2	1	6	1	1	120	NA	1	1	1	1	2	1	0	0	0	0	NA	0	0	NA	9.75	1.82	NA	4.036	1.168	NA
113556	2	23	2	4	1	1	169.394	83.5	29.1	102	0.828368	172	90	103	227	2.4	5.9	285	6.6	3	NA	NA	2	1	3	2	0	300	NA	0	0	1	1	0	0	0	0	0	0	NA	0	0	NA	2.18	1.13	NA	1.669	0.842	NA
120137	2	35	5	5	1	1	157.297	72	29.1	97.4	0.820863	75	46	111	172	3	5.6	350	7.5	1	NA	NA	2	1	3	2	0	360	NA	2	1	3	2	2	2	2	0	0	1	NA	0	0	NA	1.5	1.14	NA	1.391	1.395	NA
110881	2	29	3	2	3	3	160.754	75.2	29.1	97.2	0.81032	NA	37	NA	194	1.4	4.8	172	6.6	0	NA	NA	2	1	3	2	0	240	NA	1	0	1	2	0	0	0	0	0	0	NA	0	NA	NA	3.64	NA	NA	0.746	NA	NA
92184	2	40	1	1	1	3	137.603	55.1	29.1	89.5	0.806454	238	46	77	171	2.3	4.8	260	7.4	3	NA	NA	1	1	9	1	0	240	NA	0	0	0	0	2	0	0	0	0	0	NA	0	0	NA	1.28	1.6	NA	0.864	0.425	NA
117523	2	41	3	4	1	1	166.529	80.7	29.1	97.5	0.798603	159	36	149	217	2.7	2	291	7	1	NA	NA	2	1	3	1	0	300	NA	2	1	1	2	2	0	1	1	0	2	NA	21.6	0	NA	3.08	0.62	NA	1.308	0.984	NA
90721	2	43	5	4	3	1	154.986	69.9	29.1	93.3	0.792149	122	47	57	128	3.6	9	353	7.5	3	NA	NA	2	1	4	2	0	300	NA	0	0	0	1	0	1	0	0	0	0	NA	0	0	NA	11.9	2.26	NA	4.581	1.239	NA
119589	2	24	5	3	2	1	165.702	79.9	29.1	95.5	0.784172	50	63	75	148	2.2	4.1	229	6.2	1	NA	NA	2	1	3	2	0	360	NA	0	1	3	3	2	0	0	0	0	1	NA	0	0	NA	3.29	1.93	NA	1.169	0.935	NA
87030	2	36	3	4	1	1	161.501	75.9	29.1	93.5	0.777671	NA	82	NA	230	2.1	5.5	287	7.5	1	NA	NA	2	1	2	2	0	180	NA	1	1	1	1	0	1	1	0	0	1	NA	67	NA	NA	2.51	NA	NA	1.566	NA	NA
92051	2	36	1	3	1	1	153.873	68.9	29.1	91.1	0.776262	NA	55	NA	158	2.1	4.4	342	7.6	1	NA	NA	2	1	2	2	0	300	NA	1	0	0	1	0	0	0	0	0	0	NA	0	0	NA	23.05	4.86	NA	1.621	1.787	NA
117531	2	32	3	4	2	1	160.112	74.6	29.1	85.7	0.715881	NA	53	NA	225	3.4	8.2	382	6.5	1	NA	NA	2	1	4	3	0	60	NA	0	0	0	0	0	0	0	0	0	NA	NA	101.7	0	NA	4.74	2.55	NA	2.146	1.085	NA
76322	2	43	1	3	3	1	166.919	80.8	29	109.2	0.895442	86	45	83	145	1.7	12.5	292	7.1	1	NA	NA	1	1	3	2	0	600	NA	2	3	2	3	3	0	0	0	0	0	NA	0	NA	NA	4.11	NA	NA	4.453	NA	NA
91997	2	35	5	4	1	1	163.686	77.7	29	104.5	0.865324	NA	48	NA	212	2.3	5.5	332	7.4	1	NA	NA	2	1	6	2	0	60	NA	2	1	1	3	1	1	1	0	0	0	NA	8.2	0	NA	1.31	3.06	NA	0.685	2.637	NA
90744	2	20	3	4	1	1	172.607	86.4	29	105.8	0.853149	65	40	111	164	2.2	4.1	254	6.5	0	NA	NA	2	1	1	2	0	240	NA	0	0	3	0	3	0	0	0	0	0	NA	0	NA	NA	5.98	NA	NA	1.443	NA	NA
73955	2	31	4	5	1	2	155.253	69.9	29	97	0.824745	NA	57	NA	196	2.7	4	263	6.9	1	NA	NA	2	1	1	2	1	540	NA	1	1	0	1	0	0	0	0	0	0	NA	22.3	NA	NA	2.26	NA	NA	2.022	NA	NA
117907	2	21	2	2	1	1	154.919	69.6	29	95.5	0.812865	59	54	101	167	2	6.1	262	7.3	1	NA	NA	2	1	2	2	0	30	NA	0	1	0	0	0	0	0	0	0	0	NA	8.1	0	NA	2.03	1.87	NA	1.107	1.011	NA
122503	2	32	5	3	1	1	159.525	73.8	29	96.5	0.809433	56	57	82	150	1.9	3.2	222	7.3	3	NA	NA	2	1	5	2	0	360	NA	1	0	0	1	0	0	0	0	0	0	NA	0	0	NA	3.71	7.46	NA	2.838	2.425	NA
87891	2	42	3	3	2	1	168.973	82.8	29	98.8	0.805224	133	63	111	201	1.7	3.7	295	7.7	1	NA	NA	2	1	7	2	0	480	NA	3	3	3	3	3	3	3	3	0	1	NA	0	110.9	NA	1.81	0.88	NA	0.739	1.483	NA
77653	2	29	4	4	3	1	153.128	68	29	94	0.804763	NA	60	NA	180	2.5	5.5	284	7.5	1	NA	NA	2	1	3	2	0	480	NA	0	0	0	0	0	0	0	0	0	NA	NA	0	0	NA	3.5	1.34	NA	1.013	0.523	NA
123643	2	24	4	3	3	1	159.741	74	29	95.8	0.803018	66	38	113	164	1.4	1.7	222	8.1	3	NA	NA	2	1	2	2	0	360	NA	0	0	0	0	0	0	2	0	0	0	NA	0	0	NA	0.59	1.04	NA	1.147	1.406	NA
93074	2	44	3	5	2	2	172.307	86.1	29	99	0.799009	NA	43	NA	195	1.8	6.2	269	7.1	1	NA	NA	2	1	2	2	1	300	NA	3	3	3	3	3	1	1	0	0	1	NA	0	NA	NA	1.24	NA	NA	1.745	NA	NA
93457	2	25	4	4	3	1	164.631	78.6	29	95.2	0.786048	57	72	230	313	2.1	2.2	358	7.8	0	NA	NA	2	1	4	2	0	240	NA	0	0	0	0	0	0	0	0	0	NA	NA	0	0	NA	5.52	8.41	NA	1.452	3.498	NA
91363	2	40	1	3	1	1	144.795	60.8	29	88.8	0.781816	NA	29	NA	165	2.3	4.1	254	7	3	NA	NA	2	1	4	2	0	240	NA	0	1	1	1	0	1	1	0	0	0	NA	0	0	NA	1.94	3.45	NA	2.122	2.459	NA
117647	2	32	2	4	1	1	159.957	74.2	29	93.2	0.780697	NA	41	NA	136	2.3	3.8	293	6.9	0	NA	NA	2	1	4	2	0	480	NA	0	0	0	2	0	0	0	0	0	0	NA	0	0	NA	4.64	2.89	NA	1.503	0.691	NA
116808	2	33	4	4	2	3	160.495	74.7	29	93.2	0.779387	NA	65	NA	179	2.4	7.1	354	7.3	1	NA	NA	2	1	3	1	0	360	NA	0	0	0	0	0	0	0	0	0	NA	NA	0	0	NA	1.23	4.01	NA	0.921	2.344	NA
84628	2	32	1	4	1	1	144.914	60.9	29	88.2	0.776215	123	46	167	238	2.2	6.1	302	6.9	1	NA	NA	2	1	5	2	0	120	NA	1	1	0	0	1	0	0	0	0	0	NA	0	0	NA	2.24	6.22	NA	1.847	2.554	NA
118706	2	38	2	1	2	3	162.417	76.5	29	93.3	0.775593	NA	56	NA	199	1.4	2.4	208	7	1	NA	NA	2	1	5	2	0	20	NA	1	2	0	1	1	2	0	0	0	0	NA	8	0	NA	2.1	0.21	NA	1.165	0.482	NA
123299	2	41	4	2	3	1	160.71	74.9	29	92.2	0.770509	52	56	91	157	2.2	5.5	356	6.9	1	NA	NA	2	1	1	2	0	300	NA	3	3	1	3	3	0	2	0	0	1	NA	8.4	0	NA	1.06	6.35	NA	0.634	1.357	NA
76103	2	45	3	4	1	1	156.028	70.6	29	88.5	0.750602	NA	101	NA	231	2.1	6.1	263	6.9	1	NA	NA	2	1	3	2	0	300	NA	0	0	0	0	0	0	0	0	0	NA	NA	155.1	86.5	NA	3.09	3.15	NA	2.874	1.937	NA
115831	2	28	5	3	1	1	164.526	78.5	29	90.5	0.747478	64	33	104	150	1.9	2.1	253	7.7	1	NA	NA	2	1	1	2	0	600	NA	3	1	3	3	3	2	0	0	0	1	NA	6	15.5	NA	1.93	3.37	NA	1.074	1.701	NA
118320	2	35	1	1	1	3	166.298	80.2	29	87.4	0.718018	NA	49	NA	202	2.8	4.8	207	7.8	1	NA	NA	2	1	2	2	0	120	NA	0	0	0	0	0	0	0	0	0	NA	NA	0	NA	NA	2.36	NA	NA	1.809	NA	NA
79340	2	31	3	4	1	2	173.504	87	28.9	113.6	0.91578	193	59	62	160	2.6	13.2	261	5.7	3	NA	NA	1	1	2	2	1	600	NA	1	0	1	1	0	0	0	0	0	0	NA	0	0	NA	1.64	3.03	NA	1.781	0.75	NA
74891	2	22	4	4	1	1	163.652	77.4	28.9	102	0.846657	NA	45	NA	160	1.8	9.6	357	5.9	1	NA	NA	2	1	1	1	0	600	NA	1	0	2	2	0	0	0	0	0	0	NA	0	NA	NA	3.1	NA	NA	1.023	NA	NA
84143	2	35	5	1	3	1	159.367	73.4	28.9	100	0.841141	73	51	95	161	2.8	6.7	326	7.5	0	NA	NA	2	1	4	2	0	300	NA	0	0	0	0	1	0	0	0	0	0	NA	0.1	0	NA	6.77	4.01	NA	1.871	1.033	NA
73906	2	34	1	1	2	1	172.404	85.9	28.9	103.9	0.840253	NA	48	NA	192	1.9	3.3	241	6.9	1	NA	NA	2	1	3	2	0	120	NA	0	0	0	0	0	0	0	0	0	NA	NA	0	0	NA	2.38	2.59	NA	1.568	1.554	NA
118199	2	22	1	2	3	3	162.379	76.2	28.9	100.4	0.836638	NA	42	NA	165	2.4	9.4	276	7.6	1	NA	NA	2	1	1	1	0	120	NA	0	0	1	3	1	0	0	0	0	0	NA	0	NA	NA	5.42	NA	NA	1.881	NA	NA
120804	2	40	1	2	3	1	155.521	69.9	28.9	97.4	0.829339	NA	37	NA	186	2.3	2.1	249	7.6	1	NA	NA	2	1	2	1	0	180	NA	1	1	1	1	1	0	0	0	0	0	NA	0	0	NA	2.15	1.96	NA	1.577	1.341	NA
84607	2	40	1	1	1	3	151.006	65.9	28.9	94.3	0.81486	NA	61	NA	226	2.1	4.4	259	6.7	1	NA	NA	2	1	5	2	0	300	NA	0	0	0	1	0	0	0	0	0	0	NA	14	NA	NA	2.75	NA	NA	1.136	NA	NA
91633	2	42	5	4	3	3	149.509	64.6	28.9	84	0.729481	NA	73	NA	208	2.6	4	259	7	3	NA	NA	2	1	5	2	0	180	NA	0	0	0	0	0	0	0	0	0	NA	NA	0	0	NA	6.61	9.67	NA	4.5	1.624	NA
92624	2	23	4	1	3	1	170.588	84.1	28.9	89.4	0.726827	89	50	32	100	1.7	4.5	405	7	1	NA	NA	2	1	2	2	0	420	NA	2	1	0	0	1	0	0	0	0	0	NA	0	0	NA	0	0.27	NA	0.105	0.045	NA
86990	2	35	3	5	1	1	169.571	83.1	28.9	87.7	0.715141	39	73	66	147	1.6	2.1	195	6.9	1	NA	NA	2	1	4	2	0	600	NA	0	0	0	0	0	0	0	0	0	NA	NA	0	0	NA	2.61	1.96	NA	1.569	0.6	NA
111189	2	36	2	1	1	1	173.704	87.2	28.9	85.8	0.691275	143	36	120	185	1.7	2.1	231	6.8	1	NA	NA	2	1	7	2	0	120	NA	3	1	3	1	3	3	1	0	1	0	NA	57.2	19.1	NA	11.04	6.15	NA	5.203	2.29	NA
87719	2	36	3	4	1	1	164.992	78.4	28.8	106.6	0.883279	NA	62	NA	172	1.5	3.2	268	7.2	1	NA	NA	2	1	2	2	0	180	NA	0	0	0	0	0	0	0	0	0	NA	NA	0	0	NA	13.59	1.53	NA	7.855	1.047	NA
91054	2	37	5	1	1	1	146.605	61.9	28.8	98.9	0.869348	NA	104	NA	316	2.1	7.4	401	6.6	0	NA	NA	2	1	2	2	0	420	NA	1	0	1	1	0	0	0	0	0	0	NA	0	0	NA	6.06	0.85	NA	1.032	1.269	NA
122740	2	24	3	3	1	1	157.894	71.8	28.8	101.5	0.859715	108	41	121	184	2.9	4.7	255	6.7	1	NA	NA	2	1	4	1	0	120	NA	0	0	1	1	0	0	0	0	0	0	NA	0	0	NA	1.7	0.98	NA	0.548	1.039	NA
114590	2	33	1	1	1	1	148.838	63.8	28.8	96.5	0.841864	106	47	117	185	2.1	4.1	259	7.6	3	NA	NA	2	1	3	2	1	240	NA	0	0	1	0	1	0	0	0	0	0	NA	0	0	NA	4.77	0.97	NA	3.948	1.068	NA
118302	2	41	5	2	2	1	163.724	77.2	28.8	100	0.831793	NA	37	NA	199	2.5	5.9	191	6.8	1	NA	NA	2	1	3	2	0	60	NA	1	1	0	0	1	2	0	0	1	0	NA	0	0	NA	5.88	4.1	NA	1.05	0.982	NA
83427	2	27	1	4	1	1	164.992	78.4	28.8	100.1	0.829421	93	41	93	153	2.2	6.5	275	7	1	NA	NA	2	1	3	2	0	180	NA	0	0	1	0	0	0	0	0	0	0	NA	0	0	NA	2.05	1.16	NA	2.465	3.989	NA
82348	2	29	4	5	1	2	170.884	84.1	28.8	100.4	0.817437	NA	113	NA	268	2.2	7.7	184	6.2	3	NA	NA	2	1	1	2	0	720	NA	0	0	0	1	2	0	0	0	0	0	NA	0	0	NA	1.8	3.25	NA	1.594	1.267	NA
123678	2	42	3	3	1	1	164.042	77.5	28.8	97.4	0.809382	90	50	146	214	2.1	6.2	199	7.6	1	NA	NA	2	1	5	1	0	720	NA	3	3	3	3	3	3	3	2	0	1	NA	0	NA	NA	9.88	NA	NA	3.506	NA	NA
111613	2	40	4	4	3	1	153.32	67.7	28.8	91.7	0.78821	NA	44	NA	171	1.2	3.1	296	7.3	1	NA	NA	2	1	1	2	0	600	NA	0	0	0	1	0	0	0	0	0	0	NA	0	0	NA	0.65	1.25	NA	0.254	0.621	NA
83252	2	41	4	4	1	1	167.394	80.7	28.8	94.3	0.775734	110	40	115	177	1.9	5.5	406	7.5	1	NA	NA	2	1	6	2	0	480	NA	2	1	3	2	1	1	0	0	0	0	NA	0	0	NA	2.4	4.57	NA	1.346	1.027	NA
84383	2	32	5	4	3	2	154.11	68.4	28.8	87.5	0.750177	50	51	107	168	1.4	3.7	172	7.3	1	NA	NA	2	1	3	2	0	600	NA	1	1	1	1	1	0	1	0	0	1	NA	0	101.8	NA	0.7	2.5	NA	2.291	1.092	NA
112958	2	31	4	3	3	3	166.145	79.5	28.8	88.2	0.728277	NA	59	NA	146	1.7	2	282	6.5	1	NA	NA	2	1	2	2	0	180	NA	1	1	3	3	1	0	0	2	0	0	NA	0	0	NA	2.72	7.54	NA	1.279	1.26	NA
80193	2	43	4	2	1	2	162.233	75.8	28.8	86.1	0.719458	NA	NA	NA	NA	NA	NA	NA	NA	0	NA	NA	2	1	5	2	0	360	NA	0	0	0	0	0	0	0	0	0	NA	NA	0	0	NA	4.19	5.41	NA	2.931	2.132	NA
87720	2	27	4	3	3	1	157.012	71	28.8	84	0.713484	54	59	81	151	1	2.4	193	7.5	3	NA	NA	2	1	1	2	0	180	NA	0	0	1	2	0	1	0	0	0	0	NA	0	0	NA	3.3	2.13	NA	1.64	1.187	NA
111575	2	37	5	5	1	1	155.503	69.4	28.7	102.4	0.87601	126	36	121	182	2.7	3.6	255	7.6	1	NA	NA	2	1	5	2	0	120	NA	0	0	0	0	0	0	0	0	0	NA	NA	0	0	NA	1.43	0.84	NA	1.657	0.604	NA
75856	2	28	2	4	1	1	162.836	76.1	28.7	101.5	0.848534	92	51	131	200	1.7	4.1	237	7.7	1	NA	NA	2	1	1	2	1	420	NA	1	1	1	1	1	1	0	0	0	0	NA	0	0	NA	5.23	1.56	NA	2.717	1.192	NA
123373	2	42	3	5	1	1	163.584	76.8	28.7	100.4	0.837419	NA	159	NA	243	1.2	4.4	166	6.4	1	NA	NA	2	1	1	2	0	180	NA	0	0	0	0	0	0	0	0	0	NA	NA	0	0	NA	1.79	5.62	NA	0.42	2.063	NA
78287	2	44	1	2	1	1	163.69	76.9	28.7	98.7	0.822971	135	56	152	235	1.2	3.2	209	7.6	0	NA	NA	2	1	3	2	0	300	NA	0	0	0	0	0	0	0	0	0	NA	NA	0	0	NA	20.14	16.84	NA	4.562	5.373	NA
87436	2	36	1	1	1	1	158.389	72	28.7	95.4	0.808657	39	54	86	148	2	1.4	237	7.6	0	NA	NA	2	1	4	2	0	60	NA	0	0	1	1	0	0	0	0	0	0	NA	0	0	NA	3.69	5.48	NA	1.99	1.978	NA
124176	2	32	4	4	1	1	172.802	85.7	28.7	95.4	0.774199	NA	NA	NA	NA	NA	NA	NA	NA	1	NA	NA	2	1	4	2	0	180	NA	0	0	0	0	0	0	0	0	0	NA	NA	0	0	NA	2.99	4.37	NA	3.683	2.553	NA
91721	2	26	3	4	1	3	158.499	72.1	28.7	90	0.762619	NA	41	NA	129	2.6	9.7	320	7.6	1	NA	NA	2	1	3	2	0	360	NA	1	1	1	1	1	0	0	0	0	1	NA	0	0	NA	0.93	1.57	NA	0.158	0.906	NA
121564	2	38	5	5	1	3	168.204	81.2	28.7	92.1	0.757565	NA	46	NA	188	2.3	3.1	259	7.6	1	NA	NA	2	1	2	2	0	420	NA	0	0	0	2	0	0	0	0	0	0	NA	0	NA	NA	1.44	NA	NA	1.187	NA	NA
88476	2	35	3	1	1	2	159.922	73.4	28.7	87.2	0.7356	NA	77	NA	197	2.2	7	316	7.6	3	NA	NA	2	1	4	2	0	120	NA	0	0	0	0	0	0	0	0	0	NA	NA	0	0	NA	2.08	3.38	NA	1.817	2.306	NA
88384	2	37	3	4	1	1	167.893	80.9	28.7	89.3	0.735214	NA	49	NA	166	2.7	4.7	257	6.8	1	NA	NA	2	1	5	1	1	30	NA	0	0	0	0	0	0	0	0	0	NA	NA	0	0	NA	5.63	2.37	NA	1.597	1.249	NA
90028	2	43	1	1	1	1	158.776	72.1	28.6	101.8	0.863863	86	73	153	243	2	2.3	225	7.6	1	NA	NA	2	1	3	2	0	300	NA	1	1	1	2	2	0	1	0	0	0	NA	0	0	NA	4.02	4.13	NA	2.012	1.618	NA
85438	2	45	3	4	1	2	173.608	86.2	28.6	104.9	0.851294	NA	48	NA	180	1.9	3.5	231	6.9	1	NA	NA	2	1	2	2	0	600	NA	1	2	1	2	1	1	0	0	0	1	NA	46.8	37	NA	2.81	1.1	NA	1.332	1.536	NA
123803	2	45	5	5	1	2	164.508	77.4	28.6	101.3	0.84451	NA	51	NA	195	2.6	3.8	193	7.1	1	NA	NA	2	1	2	1	1	240	NA	0	0	0	1	1	0	0	0	0	0	NA	0	0	NA	4.59	6.83	NA	1.485	1.433	NA
92026	2	42	1	3	1	1	169.119	81.8	28.6	101.2	0.832095	83	65	140	222	2.7	4.4	286	7.8	1	NA	NA	2	1	3	2	0	600	NA	0	0	0	0	0	0	0	0	0	NA	NA	0	0	NA	1.76	1	NA	0.883	1.091	NA
80787	2	34	4	5	1	1	143.994	59.3	28.6	92	0.819794	NA	75	NA	209	2.7	2.2	283	6.9	1	NA	NA	2	1	3	1	0	480	NA	1	1	1	2	2	1	0	0	0	1	NA	0	0	NA	5.55	9.37	NA	4.415	2.204	NA
110112	2	36	5	5	1	2	157.671	71.1	28.6	96.2	0.819197	NA	54	NA	171	2.9	7	319	6.8	3	NA	NA	2	1	2	2	0	120	NA	0	0	0	0	0	0	0	0	0	NA	NA	0	0	NA	3.58	3.08	NA	1.599	0.859	NA
79940	2	26	2	1	1	1	154.535	68.3	28.6	94.5	0.812844	NA	83	NA	227	2.3	6.6	235	6.3	3	NA	NA	2	1	2	1	1	240	NA	0	0	0	1	0	0	0	0	0	0	NA	0	0	NA	2.61	2.56	NA	1.655	1.118	NA
91271	2	44	3	3	2	1	161.722	74.8	28.6	96.3	0.809714	NA	41	NA	220	4.3	6.9	362	7.1	1	NA	NA	2	1	3	2	0	540	NA	0	0	0	1	0	0	0	0	0	0	NA	0	0	NA	3.9	1.9	NA	0.901	1.473	NA
75823	2	43	5	5	1	1	160.637	73.8	28.6	92.4	0.779541	37	64	85	156	1.7	3.4	170	7.2	3	NA	NA	2	1	5	2	1	300	NA	0	0	0	0	0	0	0	0	0	NA	NA	0	0	NA	3.48	1.71	NA	2.292	2.779	NA
114774	2	22	1	3	1	1	156.111	69.7	28.6	90.5	0.7745	NA	39	NA	219	3.3	4.1	254	8.6	1	NA	NA	2	1	1	2	0	180	NA	0	0	0	0	0	0	0	0	0	NA	NA	15.5	0	NA	3.53	7.62	NA	3.258	3.078	NA
122929	2	26	3	4	3	2	157.671	71.1	28.6	90.2	0.768104	53	43	96	150	2	4.9	189	7.3	1	NA	NA	2	1	1	2	0	240	NA	1	1	2	2	1	2	0	1	1	1	NA	0	0	NA	2	4.07	NA	1.161	1.106	NA
119676	2	24	3	4	1	1	163.442	76.4	28.6	91.2	0.762785	NA	46	NA	188	2.7	3.4	212	7.2	1	NA	NA	2	1	2	2	0	300	NA	1	0	0	1	1	3	2	0	0	1	NA	0	0	NA	1.43	2.74	NA	2.895	1.003	NA
76672	2	45	4	4	3	1	171.277	83.9	28.6	92.5	0.755757	NA	56	NA	196	1.5	2.9	179	7.6	3	NA	NA	2	1	4	2	0	60	NA	0	0	0	1	0	0	2	1	0	0	NA	0	0	NA	3.18	3.87	NA	1.353	1.1	NA
81041	2	23	4	4	3	1	154.761	68.5	28.6	87.9	0.755522	NA	40	NA	153	3	4.9	267	7.4	1	NA	NA	2	1	1	2	0	420	NA	1	0	1	1	1	0	0	1	0	0	NA	18.1	0	NA	2.15	3.92	NA	2.008	0.88	NA
75415	2	24	4	1	3	1	162.906	75.9	28.6	89	0.745608	NA	75	NA	178	2	3.4	194	6.8	3	NA	NA	2	1	4	2	1	240	NA	0	1	2	3	3	2	3	3	0	1	NA	0	0	NA	5.32	3.04	NA	1.826	1.1	NA
121591	2	32	5	5	1	1	152.026	66.1	28.6	85.3	0.739741	NA	NA	NA	NA	NA	NA	NA	NA	3	NA	NA	2	1	2	2	0	420	NA	0	0	0	0	0	0	0	0	0	NA	NA	0	0	NA	3.64	0.74	NA	1.617	2.78	NA
86056	2	33	3	4	1	1	160.963	74.1	28.6	86.4	0.728182	NA	53	NA	139	2.2	4.9	203	7	1	NA	NA	2	1	3	2	0	120	NA	0	0	0	1	0	0	0	0	0	0	NA	0	NA	NA	3.17	NA	NA	1.463	NA	NA
124242	2	31	4	4	1	1	163.442	76.4	28.6	83.8	0.700893	NA	NA	NA	NA	NA	NA	NA	NA	1	NA	NA	2	1	5	2	0	240	NA	0	0	0	2	0	1	0	0	0	0	NA	0	0	NA	3.28	2.57	NA	1.164	2.107	NA
92684	2	34	4	4	3	1	164.157	76.8	28.5	103.4	0.864958	NA	NA	NA	NA	NA	NA	NA	NA	1	NA	NA	2	1	3	2	0	240	NA	0	0	0	0	0	0	0	0	0	NA	NA	0	NA	NA	2.24	NA	NA	1.273	NA	NA
77290	2	44	4	3	2	1	143.148	58.4	28.5	95.2	0.852802	NA	44	NA	277	2.2	4.2	265	7.1	1	NA	NA	2	1	4	2	1	480	NA	3	3	1	1	3	3	1	0	1	2	NA	24.6	24.6	NA	1.37	2.79	NA	0.62	2.329	NA
84759	2	34	1	4	1	1	155.71	69.1	28.5	97	0.833138	63	34	73	120	2.1	2.9	263	7.6	3	NA	NA	2	1	1	1	0	300	NA	1	0	1	1	0	0	0	0	0	0	NA	0	0	NA	3.31	2.32	NA	2.316	1.41	NA
86776	2	28	1	3	1	1	157.614	70.8	28.5	97.4	0.831506	NA	45	NA	219	3	4	299	7.9	1	NA	NA	2	1	4	2	0	360	NA	0	0	0	1	0	0	0	0	0	0	NA	9.4	0	NA	4.92	2.08	NA	0.966	0.847	NA
118679	2	44	3	5	2	1	152.982	66.7	28.5	95.1	0.824069	NA	78	NA	223	2	4.4	319	8	1	NA	NA	2	1	4	2	0	480	NA	0	0	0	0	0	0	0	0	0	NA	NA	0	0	NA	2.87	1.73	NA	2.617	1.659	NA
114453	2	39	4	4	1	1	163.621	76.3	28.5	97	0.812747	82	41	110	167	3.2	2.4	312	7	1	NA	NA	2	1	4	2	0	360	NA	0	0	0	0	0	0	0	0	0	NA	NA	0	NA	NA	1.76	NA	NA	0.696	NA	NA
115141	2	45	3	5	1	1	166.912	79.4	28.5	97.7	0.810502	NA	NA	NA	NA	2.5	7.7	225	NA	1	NA	NA	2	1	2	2	0	480	NA	0	0	2	1	1	0	0	0	0	0	NA	0	0	NA	1.11	1.93	NA	1.457	1.552	NA
113531	2	25	2	1	1	1	143.637	58.8	28.5	89	0.795903	109	49	141	212	2.3	3.1	247	7.1	3	NA	NA	2	1	1	1	0	30	NA	1	1	0	2	3	3	1	0	0	1	NA	0	0	NA	6.64	7.42	NA	4.521	3.217	NA
118723	2	44	5	5	1	1	149.971	64.1	28.5	86.4	0.75616	NA	26	NA	184	3.6	6	302	7.9	0	NA	NA	2	1	2	2	0	300	NA	1	0	0	1	0	1	0	0	0	1	NA	0	0	NA	3.2	2.65	NA	1.443	1.141	NA
75992	2	34	3	4	3	1	168.689	81.1	28.5	91	0.750932	116	58	111	192	1.4	5.9	168	6.5	1	NA	NA	2	1	3	2	0	240	NA	2	1	0	1	0	1	0	0	0	0	NA	0	0	NA	14.81	2.52	NA	6.265	2.307	NA
111778	2	32	1	3	1	1	149.737	63.9	28.5	83.8	0.733979	143	36	105	170	2	3.2	252	6.9	1	NA	NA	2	1	3	2	0	360	NA	0	0	0	1	0	0	0	0	0	0	NA	0	0	NA	3.56	1.25	NA	1.483	0.535	NA
114531	2	29	4	4	3	3	165.086	77.4	28.4	107.2	0.896314	NA	NA	NA	NA	NA	NA	NA	NA	1	NA	NA	2	1	4	2	0	360	NA	0	1	1	1	0	0	0	0	0	0	NA	0	0	NA	21.72	2.04	NA	7.306	1.766	NA
110442	2	38	2	2	1	1	166.149	78.4	28.4	104.2	0.868439	NA	32	NA	169	2	7.3	377	7.1	0	NA	NA	1	1	3	2	1	60	NA	0	0	1	0	0	0	0	0	0	0	NA	0	0	NA	6.94	5.27	NA	3.479	2.802	NA
84410	2	28	2	2	2	1	150.117	64	28.4	97.6	0.855767	112	32	78	132	2.5	4.4	442	7.2	3	NA	NA	2	1	3	2	0	300	NA	1	1	3	1	3	0	3	0	0	0	NA	0	0	NA	0.11	2.06	NA	0.56	0.287	NA
118503	2	33	2	4	1	3	170.851	82.9	28.4	104	0.854762	96	47	106	172	2	4.8	187	7.4	0	NA	NA	2	1	4	2	0	300	NA	0	0	0	0	0	0	0	0	0	NA	NA	0	NA	NA	4.11	NA	NA	1.183	NA	NA
124780	2	36	3	4	1	1	172.594	84.6	28.4	102.9	0.841441	138	71	147	246	2.2	4.4	233	6.3	1	NA	NA	2	1	7	2	0	240	NA	0	2	0	1	0	1	1	0	0	1	NA	0	0	NA	1.15	5.61	NA	1.914	1.778	NA
120874	2	32	1	2	2	1	155.192	68.4	28.4	94.6	0.815789	152	42	185	257	2.6	5.9	427	8.4	1	NA	NA	1	1	2	1	0	300	NA	0	0	1	1	0	0	0	0	0	0	NA	0	0	NA	9.74	7.86	NA	1.87	1.912	NA
77016	2	20	4	3	3	1	158.336	71.2	28.4	95	0.811062	NA	53	NA	188	2.5	5.1	207	6.5	1	NA	NA	2	1	2	2	0	480	NA	0	0	0	1	0	0	0	0	0	0	NA	4.8	0	NA	0.68	0.89	NA	1.075	1.268	NA
114338	2	40	3	3	1	1	153.021	66.5	28.4	93	0.807659	NA	52	NA	160	2.5	5.6	223	6.8	1	NA	NA	2	1	5	1	0	120	NA	1	1	3	3	0	1	1	0	0	1	NA	0	0	NA	3.77	3.58	NA	1.372	1.845	NA
120581	2	37	2	1	3	1	143.399	58.4	28.4	88.1	0.790357	NA	43	NA	188	1.1	3.6	221	6.8	3	NA	NA	2	1	1	2	0	300	NA	0	0	0	0	0	0	0	0	0	NA	NA	0	0	NA	1.8	4.39	NA	2.62	1.796	NA
90718	2	31	5	5	1	1	158.781	71.6	28.4	91.2	0.77753	NA	50	NA	180	2.5	6.5	419	7.6	0	NA	NA	2	1	1	2	1	480	NA	0	0	0	0	0	0	0	0	0	NA	NA	0	NA	NA	0.56	NA	NA	1.16	NA	NA
122800	2	34	2	5	3	3	161.311	73.9	28.4	91.6	0.774792	NA	54	NA	179	2.4	1.8	183	6.8	1	NA	NA	2	1	4	2	0	180	NA	0	0	0	0	0	0	0	0	0	NA	NA	0	0	NA	1.77	1.94	NA	0.984	0.949	NA
88666	2	28	3	4	1	1	166.678	78.9	28.4	92.3	0.768039	54	66	76	153	2.5	3.9	242	7.2	1	NA	NA	2	1	2	2	0	480	NA	0	0	0	0	0	0	0	0	0	NA	NA	0	0	NA	2.86	3.15	NA	1.792	2.278	NA
89750	2	33	1	3	1	1	160.106	72.8	28.4	90.1	0.764967	NA	40	NA	154	1.8	3.7	347	6.9	1	NA	NA	2	1	7	2	0	540	NA	1	0	0	1	0	0	0	0	0	0	NA	0	0	NA	4.47	0.44	NA	2.124	1.211	NA
78307	2	23	3	4	1	1	168.986	81.1	28.4	91.2	0.753686	NA	51	NA	188	2.7	5.9	261	7.4	0	NA	NA	2	1	2	2	0	240	NA	0	0	0	0	0	0	0	0	0	NA	NA	0	0	NA	5.52	6.14	NA	2.529	1.701	NA
88366	2	42	1	1	1	1	155.984	69.1	28.4	83.2	0.715656	NA	40	NA	199	1.9	4.7	196	7	1	NA	NA	2	1	6	2	1	480	NA	1	1	1	2	0	0	1	1	0	0	NA	0	NA	NA	3.67	NA	NA	1.32	NA	NA
78881	2	28	4	2	1	1	171.571	83.6	28.4	86.6	0.710259	NA	NA	NA	NA	2.2	3.1	214	NA	3	NA	NA	2	1	3	2	0	480	NA	0	0	0	0	0	0	0	0	0	NA	NA	0	0	NA	0	0.33	NA	3.044	0.112	NA
78280	2	41	3	4	1	2	158.67	71.5	28.4	82.5	0.703604	74	88	113	216	1.3	2.7	255	6.4	1	NA	NA	2	1	3	2	0	480	NA	0	0	0	0	0	0	0	0	0	NA	NA	0	0	NA	1.89	7.39	NA	1.424	2.255	NA
119832	2	41	2	1	1	1	151.086	64.6	28.3	103.2	0.904088	120	43	144	211	1.7	5.4	286	7.6	3	NA	NA	2	1	2	2	0	60	NA	0	0	0	0	0	0	0	0	0	NA	NA	0	0	NA	0.78	0.17	NA	0.552	0.27	NA
85785	2	32	1	1	1	1	151.786	65.2	28.3	98.5	0.860921	93	63	123	205	1.5	3.7	162	7	3	NA	NA	2	1	4	1	0	480	NA	0	0	0	0	0	0	0	0	0	NA	NA	0	0	NA	2.37	5.09	NA	1.046	2.79	NA
79335	2	39	5	2	1	1	160.498	72.9	28.3	100.8	0.856777	114	61	127	211	2.5	4.9	242	6.9	1	NA	NA	2	1	4	2	0	600	NA	0	0	0	0	2	0	0	0	0	0	NA	0	19.8	NA	5.39	11.09	NA	0.698	1.661	NA
118269	2	40	1	4	2	1	164.198	76.3	28.3	100.6	0.845388	NA	41	NA	164	3.9	5.6	300	7.2	1	NA	NA	2	1	2	2	0	360	NA	0	1	0	0	0	0	0	0	0	0	NA	0	0	NA	4.72	3.71	NA	1.679	1.051	NA
79091	2	38	1	2	1	3	155.806	68.7	28.3	97	0.8368	59	51	109	172	2.8	5.7	337	7.6	1	NA	NA	2	1	4	2	0	348	NA	1	1	1	1	0	1	0	0	0	0	NA	0	NA	NA	4.21	NA	NA	2.737	NA	NA
115467	2	34	2	1	1	3	167.817	79.7	28.3	99	0.822924	NA	47	NA	178	2.8	4.9	382	7.9	3	NA	NA	2	1	2	2	0	300	NA	0	0	0	0	0	0	0	2	0	0	NA	0	0	NA	2.91	0.57	NA	1.517	0.694	NA
84200	2	24	3	4	1	1	172.694	84.4	28.3	100.4	0.822692	119	97	169	290	3	6.9	205	6.4	1	NA	NA	2	1	3	2	0	360	NA	0	0	1	1	0	0	0	0	0	0	NA	0	0	NA	1.75	6.19	NA	1.684	2.514	NA
109639	2	42	3	4	1	3	156.485	69.3	28.3	95	0.817766	148	57	172	259	2.8	4.4	348	6.7	1	NA	NA	2	1	2	2	0	480	NA	0	0	0	0	0	0	0	0	0	NA	NA	28	14	NA	2.47	3.96	NA	1.644	2.332	NA
88272	2	43	3	4	1	1	167.078	79	28.3	97.8	0.814744	NA	61	NA	199	2.5	2.6	216	6.1	1	NA	NA	2	1	3	1	0	180	NA	0	0	0	1	0	0	0	0	0	0	NA	67	0	NA	15.85	8.46	NA	5.601	2.738	NA
77727	2	45	5	5	1	1	162.902	75.1	28.3	95.6	0.80656	NA	43	NA	201	2.9	4.3	412	7.6	1	NA	NA	1	1	1	2	1	660	NA	0	0	0	0	0	0	0	0	0	NA	NA	0	0	NA	2.14	3.44	NA	1.505	1.775	NA
73624	2	31	3	1	1	1	171.153	82.9	28.3	97.7	0.804165	NA	57	NA	274	3.5	7.8	340	7.3	0	NA	NA	2	1	16	2	0	540	NA	3	3	1	1	1	0	1	0	0	1	NA	0	0	NA	0.74	1.11	NA	0.674	0.89	NA
93213	2	32	1	1	3	1	159.394	71.9	28.3	94.1	0.802595	NA	61	NA	165	1.9	4.2	168	6.7	1	NA	NA	2	1	2	2	0	240	NA	0	0	0	0	0	0	0	0	0	NA	NA	28.1	0	NA	4.46	2.33	NA	1.751	1.574	NA
122911	2	27	1	5	1	1	152.945	66.2	28.3	91.7	0.798443	121	59	123	206	3.2	3.7	389	7.2	0	NA	NA	2	1	3	1	1	240	NA	1	1	1	1	1	0	0	1	0	0	NA	0	0	NA	5.91	15.87	NA	2.655	12.699	NA
114557	2	33	4	3	3	3	171.462	83.2	28.3	95.4	0.784525	42	42	102	152	2.3	4.6	418	6.6	1	NA	NA	2	1	1	2	0	120	NA	0	0	0	0	0	0	0	0	0	NA	NA	NA	NA	NA	NA	NA	NA	NA	NA	NA
117244	2	44	5	5	1	2	164.521	76.6	28.3	93.3	0.783274	97	42	137	198	2.8	5.4	391	6.8	1	NA	NA	3	1	5	1	0	420	NA	0	0	0	0	0	0	0	0	0	NA	NA	0	0	NA	3.61	3.34	NA	1.576	1.893	NA
120392	2	27	3	4	1	2	171.462	83.2	28.3	93.6	0.769722	61	45	104	161	1.9	4	237	7.1	3	NA	NA	2	1	1	2	1	240	NA	0	0	0	1	1	0	0	0	0	0	NA	0	0	NA	1.6	2.13	NA	2.442	1.041	NA
74424	2	35	3	5	3	1	167.501	79.4	28.3	90.7	0.754642	NA	70	NA	216	2.1	5.4	318	7.5	1	NA	NA	2	1	3	2	1	720	NA	0	0	0	2	0	1	2	1	0	0	NA	NA	NA	NA	NA	NA	NA	NA	NA	NA
75929	2	23	4	4	3	1	166.23	78.2	28.3	89.6	0.748334	NA	74	NA	181	2.8	4.2	213	6.3	1	NA	NA	2	1	2	2	0	360	NA	1	1	0	0	0	1	2	1	0	0	NA	0	0	NA	2.88	7.42	NA	1.722	3.767	NA
122370	2	36	2	5	1	3	158.393	71	28.3	87.3	0.746945	NA	NA	NA	NA	NA	NA	NA	NA	0	NA	NA	2	1	4	2	0	120	NA	0	0	0	0	2	0	0	0	0	0	NA	0	0	NA	4.24	1.53	NA	2.636	0.722	NA
89270	2	25	1	1	1	1	154.254	67.1	28.2	99.5	0.864713	288	48	93	199	1.7	9.1	236	6.5	1	NA	NA	2	1	3	2	0	360	NA	0	0	0	1	1	0	0	0	0	0	NA	0	0	NA	6.27	4.89	NA	2.46	1.634	NA
76586	2	45	3	3	3	1	167.374	79	28.2	102	0.850987	NA	33	NA	300	2.5	2.7	371	7.3	0	NA	NA	2	1	1	2	0	300	NA	3	2	2	3	3	1	1	0	0	2	NA	0	0	NA	2.46	8.28	NA	1.391	2.296	NA
93024	2	40	4	5	1	1	168.43	80	28.2	102.1	0.849147	67	53	131	197	2.4	4.5	295	6.8	1	NA	NA	1	1	6	1	0	600	NA	0	0	0	0	0	0	0	0	0	NA	NA	0	0	NA	5.18	2.43	NA	1.472	1.704	NA
83742	2	32	1	4	1	1	151.236	64.5	28.2	93.3	0.818882	NA	28	NA	190	2.9	4.6	236	7.4	1	NA	NA	2	1	3	2	0	240	NA	0	0	1	0	0	0	0	0	0	0	NA	0	0	NA	5.82	4.14	NA	1.126	1.54	NA
77884	2	40	4	4	1	3	150.177	63.6	28.2	92	0.810314	NA	50	NA	211	2.8	4.3	165	7.5	0	NA	NA	2	1	2	1	0	480	NA	0	0	0	1	1	0	0	0	0	0	NA	0	0	NA	0.74	0.71	NA	1.464	2.073	NA
84234	2	40	4	2	3	3	166.631	78.3	28.2	96.2	0.804385	33	68	87	162	2	4.8	235	7.5	3	NA	NA	2	1	10	2	0	300	NA	0	0	0	0	0	0	0	0	0	NA	NA	0	0	NA	0.54	5.48	NA	0.874	2.507	NA
88614	2	35	2	4	1	1	156.536	69.1	28.2	91.5	0.789371	NA	54	NA	176	3.6	5.1	277	6.7	1	NA	NA	1	1	3	1	0	180	NA	0	0	0	1	1	0	0	0	0	0	NA	0	18.5	NA	1.63	7.61	NA	1.381	2	NA
76006	2	32	3	4	2	1	166.738	78.4	28.2	92.6	0.774037	67	57	75	145	2.1	5.8	175	6.3	1	NA	NA	2	1	5	2	0	420	NA	0	0	1	1	1	0	0	0	0	1	NA	0	NA	NA	2.2	NA	NA	2.122	NA	NA
120889	2	39	2	2	1	1	164.597	76.4	28.2	90.3	0.759703	NA	47	NA	175	2.7	4	338	7.6	0	NA	NA	2	1	4	2	0	180	NA	1	1	0	1	1	0	0	3	0	0	NA	0	0	NA	2.92	2.14	NA	1.062	1.509	NA
77051	2	21	1	3	1	1	160.23	72.4	28.2	88.8	0.757195	40	86	85	179	2.2	2.2	217	7.1	0	NA	NA	2	1	1	2	0	600	NA	0	0	1	0	1	0	0	0	0	0	NA	0	NA	NA	3.31	NA	NA	1.418	NA	NA
80516	2	42	4	4	1	1	163.733	75.6	28.2	87.3	0.736399	NA	55	NA	190	1.3	2.2	222	7.1	1	NA	NA	2	1	3	2	0	420	NA	0	0	0	0	0	0	0	0	0	NA	NA	0	0	NA	6.07	8.8	NA	2.469	2.385	NA
113637	2	35	2	3	2	1	152.984	66	28.2	81.5	0.711215	NA	57	NA	170	1.8	3.1	261	6.7	1	NA	NA	2	1	3	2	1	90	NA	0	0	0	0	0	0	0	0	0	NA	NA	0	0	NA	3.49	2.54	NA	0.931	0.654	NA
117417	2	27	5	5	1	1	167.692	79.3	28.2	84.3	0.70265	NA	NA	NA	NA	NA	NA	NA	NA	1	NA	NA	2	1	1	2	0	420	NA	0	0	0	0	0	0	0	0	0	NA	NA	0	0	NA	3.08	0.75	NA	1.879	1.406	NA
92506	2	34	1	2	1	1	155.904	68.3	28.1	97.4	0.843968	81	43	112	171	2.5	4	212	6.6	1	NA	NA	2	1	6	2	0	300	NA	1	0	0	0	1	0	0	0	0	0	NA	12.3	0	NA	1.74	10.19	NA	0.404	2.048	NA
115929	2	44	3	4	1	2	174.943	86	28.1	101.2	0.827805	67	60	144	217	1.9	4	351	6.9	1	NA	NA	2	1	2	2	0	360	NA	0	0	0	1	1	0	0	0	0	0	NA	0	0	NA	6.23	1.29	NA	1.949	0.646	NA
87194	2	31	4	5	1	1	162.06	73.8	28.1	97.4	0.827784	NA	57	NA	194	1.5	2	206	6.1	1	NA	NA	2	1	2	2	0	900	NA	0	0	0	0	0	0	0	0	0	NA	NA	0	0	NA	0.23	1.23	NA	1.102	1.258	NA
75799	2	22	3	4	1	1	166.821	78.2	28.1	98	0.820912	NA	30	NA	196	2.5	6.6	287	7.1	1	NA	NA	2	1	1	2	0	240	NA	0	0	2	3	0	0	0	0	0	0	NA	0	NA	NA	0.46	NA	NA	0.526	NA	NA
114915	2	44	3	5	1	2	160.958	72.8	28.1	90.5	0.77177	155	38	161	230	2.6	4.6	360	7.1	1	NA	NA	2	1	3	2	0	300	NA	0	0	1	1	0	0	0	0	0	0	NA	0	0	NA	0.84	0.95	NA	0.448	1.384	NA
74127	2	33	4	3	3	1	154.873	67.4	28.1	88.7	0.771136	58	54	104	170	2.4	3.3	416	6.7	1	NA	NA	2	1	5	2	0	1080	NA	0	0	0	0	0	0	0	0	0	NA	NA	0	0	NA	3.32	3.48	NA	1.87	1.075	NA
74348	2	45	4	4	1	1	170.095	81.3	28.1	92.2	0.764858	58	58	87	157	1.4	2.6	367	6.8	1	NA	NA	2	1	3	2	0	360	NA	1	1	2	1	1	1	0	0	0	0	NA	29.8	0	NA	8.91	12.67	NA	2.903	3.457	NA
116761	2	30	4	3	3	1	168.941	80.2	28.1	91.7	0.763305	NA	48	NA	145	3.5	5.3	366	7.8	1	NA	NA	2	1	3	1	0	180	NA	0	1	0	1	0	0	1	0	0	1	NA	0	0	NA	2.33	3.07	NA	0.896	0.744	NA
90837	2	23	4	2	3	1	166.501	77.9	28.1	88.8	0.744562	NA	34	NA	145	2.9	2.1	276	7.2	3	NA	NA	2	1	6	2	0	480	NA	0	0	0	0	0	0	0	0	0	NA	NA	0	0	NA	2.35	2.16	NA	0.537	0.519	NA
77291	2	42	3	3	3	1	155.609	67.8	28	103.5	0.899809	92	68	103	189	2.5	11	203	6.7	1	NA	NA	2	1	3	2	0	60	NA	1	1	1	3	3	0	0	1	0	1	NA	NA	NA	NA	NA	NA	NA	NA	NA	NA
76659	2	36	3	4	1	3	165.508	76.7	28	105.6	0.89019	NA	66	NA	246	1.5	9.6	193	5.6	0	NA	NA	2	1	2	2	1	360	NA	0	0	3	3	3	0	0	0	0	0	NA	0	0	NA	3.92	2.39	NA	1.491	1.423	NA
87918	2	33	2	4	1	1	157.321	69.3	28	102.8	0.888848	NA	51	NA	192	2.5	4.1	350	7.7	3	NA	NA	2	1	4	2	0	60	NA	0	0	0	1	0	0	0	0	0	0	NA	0	0	NA	7.84	3.4	NA	1.727	2.271	NA
86493	2	44	3	5	3	1	150.594	63.5	28	99	0.874902	55	46	108	165	2.4	4.8	177	7.3	0	NA	NA	2	1	7	2	0	180	NA	1	0	1	1	0	0	0	0	0	1	NA	0	0	NA	4.25	27.1	NA	2.576	5.02	NA
89305	2	32	4	4	3	1	169.242	80.2	28	104.1	0.86781	NA	55	NA	124	2.7	5.8	250	6.4	0	NA	NA	1	1	1	1	0	480	NA	0	0	0	1	0	0	0	0	0	0	NA	0	0	NA	0.43	0.8	NA	1.673	2.782	NA
79320	2	26	3	4	1	1	162.898	74.3	28	99.6	0.84631	NA	33	NA	169	3.2	4.6	237	7.4	0	NA	NA	2	1	3	2	0	600	NA	0	1	3	2	0	2	0	0	0	0	NA	0	0	NA	4.06	3.39	NA	1.683	1.761	NA
76987	2	33	1	3	1	1	159.239	71	28	97.4	0.83707	NA	42	NA	242	3.3	4.7	302	7.8	1	NA	NA	1	1	5	1	0	480	NA	0	0	0	1	0	0	1	0	0	0	NA	0	0	NA	4.88	6.78	NA	1.761	2.564	NA
89901	2	36	1	2	1	1	163.336	74.7	28	98.2	0.833295	NA	59	NA	162	1.9	7	256	7.4	3	NA	NA	2	1	3	2	0	540	NA	0	0	0	0	0	0	0	0	0	NA	NA	0	0	NA	6.04	1.42	NA	2.37	1.693	NA
81662	2	33	3	2	1	1	156.867	68.9	28	94.5	0.818266	183	40	145	222	2.1	4.6	312	7.1	1	NA	NA	2	1	3	2	0	240	NA	0	0	0	1	0	0	0	0	0	0	NA	0	0	NA	2.67	1.51	NA	0.992	0.956	NA
73981	2	36	5	3	3	1	145.774	59.5	28	89.8	0.806612	57	70	112	193	1.9	4.1	246	6.9	1	NA	NA	2	1	3	2	0	300	NA	1	0	0	0	0	0	0	0	0	0	NA	30.9	0	NA	3.33	0.96	NA	1.182	2.998	NA
111551	2	39	1	1	1	1	155.495	67.7	28	92.5	0.804474	63	50	89	152	2.2	3.9	278	6.9	0	NA	NA	2	1	4	2	0	170	NA	0	3	0	2	3	3	0	2	1	1	NA	0	0	NA	15.39	12.34	NA	6.65	4.954	NA
79927	2	37	4	4	3	1	177.281	88	28	98.4	0.801479	41	43	82	133	1.1	3.9	214	7.9	1	NA	NA	2	1	6	2	0	300	NA	1	1	1	1	1	0	1	0	0	1	NA	11.2	0	NA	2.25	1.45	NA	1.364	0.867	NA
120454	2	40	1	2	1	1	156.525	68.6	28	92	0.797488	150	56	108	194	1.9	6.6	261	7.3	1	NA	NA	2	1	4	2	0	180	NA	0	0	0	0	0	0	0	0	0	NA	NA	0	0	NA	4.75	1.83	NA	2.666	1.306	NA
120553	2	32	5	4	3	1	161.356	72.9	28	93	0.793996	275	32	108	195	2.2	5.4	264	7.7	1	NA	NA	2	1	1	2	0	300	NA	2	3	3	3	1	2	3	0	0	2	NA	0.8	0	NA	0.84	5.3	NA	0.167	2.614	NA
113213	2	43	3	4	1	1	163.117	74.5	28	92.5	0.785453	NA	68	NA	208	1.8	3.4	262	7.2	1	NA	NA	2	1	5	2	0	120	NA	0	0	0	0	0	0	0	0	0	NA	NA	23.2	18.5	NA	0.86	1.45	NA	0.525	0.691	NA
123426	2	26	3	4	1	3	171.756	82.6	28	94	0.777858	NA	53	NA	123	2.5	3	377	7.1	1	NA	NA	2	1	2	2	0	240	NA	1	1	0	1	2	0	1	0	0	1	NA	36.3	0	NA	6.62	3.57	NA	1.571	1.607	NA
74440	2	31	3	5	1	1	168.077	79.1	28	92.7	0.775449	94	55	96	170	1.6	5.1	244	7.3	1	NA	NA	2	1	2	2	0	540	NA	0	1	1	1	1	1	0	0	0	0	NA	0	0	NA	4.06	1.98	NA	3.261	2.974	NA
120313	2	37	4	4	1	1	167.545	78.6	28	92.2	0.77249	NA	68	NA	128	3.8	2.1	233	7.5	1	NA	NA	2	1	3	1	0	600	NA	0	0	0	0	0	0	0	0	0	NA	NA	0	0	NA	2.49	2.46	NA	0.481	0.855	NA
121259	2	35	4	3	1	1	152.48	65.1	28	87.9	0.771989	NA	72	NA	246	2.8	1.9	271	7.8	1	NA	NA	2	1	7	2	0	600	NA	0	0	0	0	0	0	0	0	0	NA	NA	0	37	NA	1.78	1.54	NA	1.395	0.506	NA
73998	2	32	4	4	3	1	163.772	75.1	28	90.3	0.765236	22	55	75	134	2.6	1.6	203	7.2	1	NA	NA	2	1	2	2	0	600	NA	0	0	0	0	0	0	0	0	0	NA	NA	0	0	NA	2.28	13.73	NA	1.379	1.432	NA
117447	2	42	2	3	2	2	158.678	70.5	28	88.7	0.763649	85	52	88	157	1.8	4.2	391	7.6	1	NA	NA	2	1	2	2	0	420	NA	0	0	0	0	0	0	0	0	0	NA	NA	0	0	NA	2.76	3.17	NA	1.141	1.105	NA
121582	2	31	4	2	1	1	160.579	72.2	28	89.2	0.763393	NA	88	NA	151	1.5	2.8	385	7.2	1	NA	NA	2	1	5	2	1	120	NA	1	1	2	1	1	0	0	0	0	1	NA	15.5	0	NA	0.72	1.37	NA	1.352	0.307	NA
83558	2	43	4	4	3	1	160.022	71.7	28	87.5	0.750146	NA	NA	NA	NA	NA	NA	NA	NA	0	NA	NA	2	1	3	2	0	600	NA	0	0	0	0	0	0	0	0	0	NA	NA	0	0	NA	0.31	0	NA	1.32	0	NA
115601	2	22	4	3	1	1	165.184	76.4	28	86.6	0.730739	81	39	124	179	2.7	2.7	243	7.7	1	NA	NA	2	1	1	2	1	600	NA	0	0	0	0	0	0	0	0	0	NA	NA	9.4	0	NA	0.63	0	NA	0.535	0.086	NA
111126	2	26	4	4	1	1	163.738	74.8	27.9	98.6	0.837657	84	64	72	153	2.8	6.6	203	6.8	1	NA	NA	2	1	2	1	0	480	NA	0	0	0	0	0	0	0	0	0	NA	NA	35	NA	NA	26.81	NA	NA	4.352	NA	NA
88867	2	28	3	5	1	1	172.791	83.3	27.9	101	0.835266	176	92	226	353	2.1	8.9	256	6.4	1	NA	NA	2	1	3	2	0	480	NA	0	1	2	1	1	0	0	0	0	0	NA	0	0	NA	2.88	4.43	NA	2.312	3.075	NA
124462	2	41	4	4	1	1	170.599	81.2	27.9	99	0.823969	80	43	92	151	1.7	3.5	293	6.6	1	NA	NA	2	1	4	2	0	480	NA	1	1	3	1	3	1	0	0	1	1	NA	32.7	14	NA	4.23	2.1	NA	0.888	0.69	NA
87994	2	37	4	5	1	1	166.774	77.6	27.9	96.5	0.812319	NA	62	NA	174	1.6	5	204	7.3	1	NA	NA	2	1	4	2	0	60	NA	0	0	1	1	0	0	0	0	0	0	NA	0	0	NA	1.97	3.93	NA	1.995	1.823	NA
117730	2	45	1	2	1	1	152.87	65.2	27.9	92.2	0.810651	NA	49	NA	153	1.4	6.5	260	7.3	0	NA	NA	2	1	2	2	0	120	NA	2	0	1	1	0	0	0	0	0	0	NA	0	0	NA	3.71	3.46	NA	1.256	1.965	NA
82975	2	44	3	4	1	1	160.309	71.7	27.9	93.8	0.805356	188	39	159	236	3.4	2.1	263	6.7	1	NA	NA	2	1	1	1	1	600	NA	0	0	0	1	0	0	0	0	0	0	NA	0	0	NA	1.44	1.84	NA	1.933	0.77	NA
120194	2	33	4	5	1	3	160.085	71.5	27.9	92.4	0.79389	NA	51	NA	214	2.1	5.1	205	7.5	1	NA	NA	2	1	4	2	1	300	NA	0	1	0	0	0	1	0	0	0	0	NA	8.6	9	NA	0.79	9.95	NA	0.339	3.376	NA
111789	2	38	3	4	1	1	158.284	69.9	27.9	91	0.786298	NA	54	NA	172	3.1	6	308	7.4	1	NA	NA	2	1	4	2	0	180	NA	0	0	0	0	1	0	0	0	0	0	NA	NA	NA	NA	NA	NA	NA	NA	NA	NA
87653	2	37	2	1	1	1	154.85	66.9	27.9	89.6	0.782738	NA	52	NA	156	2.9	4.2	205	7.1	3	NA	NA	2	1	3	2	0	120	NA	0	0	0	0	1	0	0	0	0	0	NA	0	0	NA	0.64	0.97	NA	0.97	0.931	NA
82194	2	23	2	4	3	1	156.118	68	27.9	89	0.774333	NA	49	NA	155	3.1	4.1	228	6.9	1	NA	NA	2	1	4	2	0	480	NA	0	0	0	0	0	0	0	0	0	NA	NA	5.9	0	NA	3.81	4.02	NA	1.318	0.923	NA
91082	2	45	1	2	3	1	163.19	74.3	27.9	89.3	0.759922	49	96	106	212	1.7	3.9	260	7.9	1	NA	NA	2	1	4	2	0	120	NA	0	0	0	1	0	0	0	0	0	0	NA	33.9	0	NA	18.47	5.89	NA	3.615	2.736	NA
74693	2	37	1	1	2	3	153.572	65.8	27.9	86.2	0.756163	82	51	110	177	1.7	4	115	7.4	1	NA	NA	3	1	2	2	0	120	NA	0	0	1	1	2	0	0	0	0	0	NA	0	0	NA	2.79	2.16	NA	1.092	0.941	NA
124338	2	32	5	5	1	3	163.738	74.8	27.9	85.1	0.722968	58	50	104	166	2	3.5	323	7.6	1	NA	NA	2	1	1	2	0	480	NA	0	0	0	1	1	0	0	0	0	1	NA	0	0	NA	2	2.63	NA	2.318	1.274	NA
87165	2	35	1	1	1	3	153.379	65.4	27.8	103.1	0.90715	NA	39	NA	198	1.6	4.5	211	7	1	NA	NA	2	1	5	2	0	180	NA	1	1	0	1	1	0	0	0	0	0	NA	NA	NA	NA	NA	NA	NA	NA	NA	NA
83336	2	32	1	3	1	1	160.036	71.2	27.8	103	0.887221	NA	27	NA	186	2.1	4.6	206	7	3	NA	NA	2	1	2	2	0	240	NA	0	0	0	0	0	0	0	0	0	NA	NA	0	0	NA	1.72	1.6	NA	1.416	1.262	NA
118575	2	42	1	4	1	3	149.7	62.3	27.8	99	0.881714	56	63	141	215	2.3	4.2	303	8.2	0	NA	NA	2	1	8	2	0	180	NA	0	0	0	1	0	0	0	0	0	0	NA	NA	NA	NA	NA	NA	NA	NA	NA	NA
80680	2	45	4	2	1	1	167.289	77.8	27.8	101	0.850925	NA	76	NA	180	2	1.8	172	6.9	3	NA	NA	2	1	3	2	0	480	NA	0	0	0	0	0	3	0	0	0	0	NA	0	0	NA	2.42	1.88	NA	1.199	0.986	NA
80662	2	36	1	4	1	1	151.966	64.2	27.8	92	0.81324	NA	42	NA	215	2.8	3.7	241	7.3	3	NA	NA	2	1	3	2	0	60	NA	0	1	0	1	1	0	0	0	0	0	NA	0	0	NA	2.39	1.76	NA	1.236	1.849	NA
76303	2	43	4	1	1	3	161.044	72.1	27.8	92	0.789985	50	44	137	191	1.7	1	183	8	3	NA	NA	2	1	5	2	0	420	NA	0	0	0	0	0	0	1	0	0	0	NA	0	0	NA	0.09	0.81	NA	0.553	0.635	NA
81967	2	30	4	4	3	1	163.152	74	27.8	92.6	0.789983	74	70	102	187	3.1	4.3	308	7.1	1	NA	NA	2	1	1	2	1	180	NA	0	0	0	0	0	1	0	0	0	0	NA	0	0	NA	1.74	2.63	NA	2.251	0.821	NA
117646	2	27	1	3	1	1	147.155	60.2	27.8	85	0.763545	NA	54	NA	137	2.8	4.5	269	7.4	0	NA	NA	2	1	3	2	0	420	NA	0	0	0	1	0	1	0	0	0	0	NA	0	0	NA	16.87	3.27	NA	3.712	1.455	NA
117877	2	41	4	5	1	2	168.894	79.3	27.8	90.7	0.760508	49	50	73	133	1.9	4.4	241	7.3	1	NA	NA	2	1	5	2	0	120	NA	0	0	0	0	0	0	0	0	0	NA	NA	18.5	0	NA	5.89	1.6	NA	2.695	0.894	NA
123322	2	39	5	5	1	1	153.027	65.1	27.8	85.4	0.752276	60	51	101	164	2.8	2.8	291	6	1	NA	NA	2	1	1	2	1	120	NA	0	0	0	0	1	0	1	0	0	0	NA	0	0	NA	2.89	1.65	NA	1.139	2.545	NA
80490	2	33	4	4	3	1	163.593	74.4	27.8	87.8	0.748025	NA	95	NA	202	1.6	4.8	182	6.6	1	NA	NA	2	1	4	2	0	480	NA	1	1	0	1	1	0	0	0	0	0	NA	18.5	21.6	NA	1.82	1.47	NA	0.903	1.282	NA
74101	2	34	5	3	3	1	173.309	83.2	27.7	105	0.871215	NA	38	NA	213	2.5	7.1	264	7.3	1	NA	NA	2	1	2	1	0	420	NA	0	0	1	0	1	0	0	0	0	0	NA	0	0	NA	1.68	6.36	NA	1.283	2.81	NA
86323	2	24	1	2	1	1	157.485	68.7	27.7	97.2	0.846046	115	53	96	172	3.1	6.4	319	7.3	0	NA	NA	1	1	2	2	0	360	NA	1	1	2	1	1	1	0	0	0	0	NA	0	0	NA	0.18	0.65	NA	1.144	0.533	NA
114225	2	25	5	4	1	1	146.191	59.2	27.7	93.3	0.842884	NA	NA	NA	NA	NA	NA	NA	NA	1	NA	NA	2	1	2	2	0	180	NA	0	0	0	0	0	0	0	0	0	NA	NA	NA	NA	NA	NA	NA	NA	NA	NA	NA
124813	2	43	4	5	1	3	168.45	78.6	27.7	98.5	0.828986	45	52	96	157	1.7	3	249	7.5	0	NA	NA	2	1	2	2	1	120	NA	0	0	2	0	0	0	0	0	0	0	NA	0	0	NA	4.44	2.66	NA	2.729	1.81	NA
80757	2	39	5	5	1	1	160.325	71.2	27.7	95.4	0.822991	129	50	134	210	2.7	2.9	233	7.3	3	NA	NA	2	1	2	2	0	420	NA	0	0	0	0	0	0	0	0	0	NA	NA	0	NA	NA	1.04	NA	NA	1.116	NA	NA
114533	2	23	3	3	3	3	166.293	76.6	27.7	95.6	0.809781	NA	35	NA	112	2.6	6.9	308	6.9	1	NA	NA	2	1	2	2	0	348	NA	0	0	1	3	0	0	0	0	0	0	NA	12	0	NA	6.98	10.44	NA	3.414	10.341	NA
121652	2	31	3	4	1	1	154.826	66.4	27.7	91	0.798852	101	45	146	211	2.2	3.6	260	6.6	0	NA	NA	2	1	4	2	0	300	NA	0	0	1	2	1	0	0	0	0	0	NA	0	0	NA	1.88	3	NA	0.636	1.327	NA
90610	2	43	4	5	1	1	161.782	72.5	27.7	90.9	0.780632	NA	59	NA	155	1.5	4.1	224	6.9	1	NA	NA	2	1	1	2	0	480	NA	0	0	3	2	1	0	0	0	0	0	NA	0	0	NA	1.71	2.75	NA	2.197	1.836	NA
81721	2	39	3	4	1	1	170.58	80.6	27.7	93.2	0.779469	60	48	116	176	1.6	4.5	175	6.8	1	NA	NA	2	1	5	2	0	240	NA	0	0	0	0	0	0	0	0	0	NA	NA	0.6	0	NA	1.59	2.73	NA	0.755	1.442	NA
85518	2	32	5	5	1	2	153.773	65.5	27.7	88.1	0.776037	70	50	74	138	2.4	2.4	240	7.5	3	NA	NA	2	1	2	2	0	360	NA	1	0	0	0	0	0	0	0	0	0	NA	0	0	NA	1.3	1.88	NA	0.719	0.879	NA
119960	2	45	4	5	1	1	163.226	73.8	27.7	88.9	0.760071	97	54	88	161	1.9	3.2	350	6.7	1	NA	NA	2	1	2	2	0	420	NA	0	0	1	1	0	1	1	0	0	0	NA	16	0	NA	0.97	0	NA	0.997	2.381	NA
122334	2	29	1	1	1	1	151.765	63.8	27.7	85.7	0.759875	NA	75	NA	174	2.1	3.4	240	6.9	1	NA	NA	2	1	2	2	0	120	NA	1	1	1	1	1	0	0	1	0	1	NA	18.7	0	NA	7.41	2.33	NA	2.839	1.631	NA
115252	2	40	3	5	1	1	153.934	65.4	27.6	105.1	0.927533	NA	67	NA	234	1.1	6.4	197	5.8	1	NA	NA	2	1	8	2	0	600	NA	0	0	0	0	0	0	0	0	0	NA	NA	0	0	NA	0.79	3.94	NA	1.656	1.837	NA
74207	2	32	3	5	1	1	167.029	77	27.6	103	0.872641	67	78	141	232	1.9	3	247	7.6	0	NA	NA	2	1	1	2	0	540	NA	0	0	0	1	0	0	0	0	0	0	NA	0	0	NA	3.95	5.2	NA	2.405	2.045	NA
92210	2	30	4	4	3	1	177.033	86.5	27.6	103.9	0.855033	NA	69	NA	201	2.5	6.1	276	7.6	1	NA	NA	1	1	3	1	0	600	NA	1	1	1	1	0	1	0	0	0	0	NA	0	0	NA	1.52	6.87	NA	1.213	1.43	NA
121606	2	44	1	1	1	1	157.885	68.8	27.6	98	0.853985	72	62	88	164	1.8	1.9	150	6.8	3	NA	NA	2	1	5	2	0	120	NA	0	0	0	0	0	0	0	0	0	NA	NA	0	0	NA	4.12	5.12	NA	1.335	3.074	NA
79697	2	33	5	5	1	1	162.632	73	27.6	97.1	0.8337	NA	43	NA	137	2.6	4.1	203	7.4	3	NA	NA	2	1	2	2	0	360	NA	0	0	0	0	0	0	0	0	0	NA	NA	0	NA	NA	0.19	NA	NA	0.305	NA	NA
112431	2	22	4	2	1	1	157.885	68.8	27.6	94.9	0.826971	25	45	63	113	3	5	378	6	3	NA	NA	2	1	2	2	0	120	NA	2	2	2	3	2	0	2	0	0	0	NA	0	0	NA	9.29	1.47	NA	4.482	0.51	NA
88257	2	31	2	1	1	3	158.343	69.2	27.6	94.3	0.820553	NA	46	NA	180	2.5	5	238	7.1	1	NA	NA	2	1	2	2	0	180	NA	0	0	0	0	1	0	0	0	0	0	NA	0	0	NA	1.88	0.8	NA	2.261	1.715	NA
74613	2	35	3	3	1	1	160.953	71.5	27.6	93.8	0.809557	91	38	98	154	2.4	4.4	266	7	0	NA	NA	2	1	5	2	0	600	NA	0	1	0	0	2	0	0	0	0	0	NA	0	0	NA	3.47	6.4	NA	1.254	1.558	NA
90146	2	34	4	3	3	1	162.409	72.8	27.6	94.2	0.809355	NA	52	NA	194	3.3	4.9	297	7.7	1	NA	NA	1	1	6	2	0	240	NA	2	1	3	3	0	0	0	1	0	0	NA	0	0	NA	0.52	0	NA	0.391	0	NA
88047	2	29	1	3	3	1	163.077	73.4	27.6	90.7	0.777686	NA	59	NA	147	1.7	7.2	232	6.3	1	NA	NA	2	1	2	2	0	480	NA	0	0	1	1	0	0	0	0	0	0	NA	0	0	NA	1.25	2.47	NA	0.68	1.248	NA
124297	2	23	4	3	3	1	160.502	71.1	27.6	89.3	0.771801	NA	45	NA	185	2.4	4.1	283	7.2	1	NA	NA	2	1	5	2	0	360	NA	0	0	0	0	0	0	0	0	0	NA	NA	0	0	NA	2.92	2.43	NA	1.349	0.899	NA
79873	2	42	2	1	1	1	154.989	66.3	27.6	87.4	0.768695	NA	55	NA	196	1.8	3.8	179	7	3	NA	NA	2	1	5	2	0	120	NA	0	0	0	0	0	1	0	0	0	0	NA	0	0	NA	3.53	0.56	NA	1.494	2.047	NA
80511	2	40	4	4	1	3	167.354	77.3	27.6	90.8	0.768532	NA	47	NA	156	1.9	3.8	264	6.3	1	NA	NA	2	1	2	2	0	540	NA	1	0	0	1	0	0	0	0	0	0	NA	9.4	0	NA	6.53	4.17	NA	2.921	2.928	NA
76008	2	31	5	4	1	1	159.028	69.8	27.6	88	0.764082	151	73	79	182	2.4	2.9	235	7	1	NA	NA	2	1	5	1	0	600	NA	1	0	1	1	0	0	0	0	0	0	NA	18.7	0	NA	10.83	1.72	NA	2.713	0.658	NA
79375	2	35	3	2	1	1	170.251	80	27.6	89.5	0.751055	60	68	134	214	2	2.7	205	7.6	3	NA	NA	2	1	2	2	0	180	NA	0	0	1	3	0	0	0	0	0	1	NA	0	0	NA	0.84	0.35	NA	0.939	1.18	NA
87180	2	33	5	5	1	3	160.454	70.8	27.5	100.1	0.867369	NA	29	NA	140	3.9	8.4	216	7.4	3	NA	NA	2	1	3	2	0	240	NA	0	0	0	0	0	0	1	0	0	1	NA	0	0	NA	0.28	2.34	NA	1.364	1.985	NA
89637	2	40	1	1	3	1	151.837	63.4	27.5	96.2	0.856901	83	43	127	187	1.9	3.5	214	7.1	1	NA	NA	2	1	8	1	0	120	NA	0	1	1	2	2	1	1	1	1	1	NA	11.2	0	NA	5.59	5.46	NA	2.29	2.172	NA
75088	2	39	3	4	1	1	165.145	75	27.5	99.2	0.847275	NA	32	NA	158	1.2	3.7	214	7.7	3	NA	NA	1	1	3	2	0	360	NA	0	0	0	0	0	0	0	0	0	NA	NA	0	0	NA	1.5	10.62	NA	0.428	2.834	NA
85147	2	25	1	2	1	1	148.324	60.5	27.5	92.7	0.835447	NA	40	NA	195	2.2	6.2	295	7.2	1	NA	NA	2	1	2	2	0	480	NA	0	0	0	1	0	0	0	0	0	0	NA	0	0	NA	3.55	8.26	NA	1.062	2.756	NA
115299	2	30	5	5	1	3	163.151	73.2	27.5	95.6	0.821501	NA	NA	NA	NA	NA	NA	NA	NA	1	NA	NA	2	1	1	2	0	240	NA	0	0	0	1	0	0	0	0	0	0	NA	0	0	NA	1.77	1.15	NA	1.448	1.185	NA
85396	2	33	5	5	1	3	160.68	71	27.5	93.7	0.81134	68	58	102	174	2.1	4.2	226	8	3	NA	NA	2	1	2	2	0	240	NA	1	0	0	0	0	0	0	0	0	0	NA	0	NA	NA	3.49	NA	NA	2.371	NA	NA
114057	2	25	2	4	1	1	159.886	70.3	27.5	93.2	0.809012	78	43	42	101	2.1	3.6	257	7.4	0	NA	NA	2	1	1	1	1	30	NA	0	0	0	0	0	0	0	0	0	NA	NA	0	0	NA	0.63	3.23	NA	0.674	1.29	NA
74582	2	30	3	4	1	1	159.317	69.8	27.5	92.5	0.80437	NA	49	NA	190	2.4	3.8	239	6.9	1	NA	NA	2	1	4	1	0	240	NA	0	0	0	1	0	0	1	0	0	0	NA	0	0	NA	4.32	2.1	NA	1.009	0.998	NA
87044	2	32	4	4	1	1	172.152	81.5	27.5	95	0.794717	100	67	162	249	1.4	2.7	166	6.8	1	NA	NA	2	1	8	2	0	600	NA	1	2	2	2	2	2	1	1	0	1	NA	0	NA	NA	7.32	NA	NA	1.586	NA	NA
80756	2	32	4	5	1	2	150.393	62.2	27.5	87.3	0.781348	NA	51	NA	233	3.1	3.7	338	7.5	1	NA	NA	2	1	1	2	0	600	NA	0	0	0	0	0	0	0	0	0	NA	NA	0	0	NA	1.07	11.41	NA	0.424	4.214	NA
114848	2	39	4	4	2	1	161.245	71.5	27.5	88.3	0.763242	NA	NA	NA	NA	3	4	255	NA	1	NA	NA	2	1	2	2	0	180	NA	1	1	2	2	0	0	1	0	0	0	NA	0	NA	NA	12.53	NA	NA	4.422	NA	NA
112556	2	29	4	5	1	2	165.804	75.6	27.5	89	0.758643	NA	54	NA	140	2.1	1.9	343	7.9	1	NA	NA	2	1	1	2	1	660	NA	0	1	0	1	0	0	0	0	0	0	NA	0	NA	NA	4.65	NA	NA	1.33	NA	NA
85158	2	44	5	4	1	1	150.393	62.2	27.5	84.7	0.758078	49	90	89	189	1.6	6.1	243	7.4	0	NA	NA	2	1	1	9	0	420	NA	0	0	0	0	0	0	0	0	0	NA	NA	0	0	NA	6.68	3.24	NA	1.539	1.334	NA
115094	2	28	4	4	1	1	159.317	69.8	27.5	83.1	0.722629	109	42	90	154	2	2	224	7.1	1	NA	NA	2	1	2	2	0	480	NA	1	1	0	1	0	0	0	0	0	0	NA	0	NA	NA	2.05	NA	NA	2.102	NA	NA
112661	2	45	3	4	1	1	168.938	78.2	27.4	107	0.905773	NA	43	NA	187	4.4	8.3	416	6.7	1	NA	NA	1	1	3	2	0	240	NA	0	0	0	0	0	0	0	0	0	NA	NA	0	0	NA	2.82	3.19	NA	0.686	0.802	NA
113061	2	33	5	5	1	3	161.652	71.6	27.4	100.7	0.871442	96	50	121	190	2.4	3.5	264	6.8	3	NA	NA	2	1	1	2	1	480	NA	0	1	1	1	1	0	0	0	0	0	NA	0	0	NA	3.15	1.14	NA	2.162	1.739	NA
88920	2	33	5	5	1	2	160.406	70.5	27.4	97.9	0.850497	NA	63	NA	215	1.9	4.5	302	6.8	1	NA	NA	2	1	2	1	1	600	NA	1	1	0	2	1	0	0	0	0	0	NA	15.9	0	NA	3.51	0.66	NA	1.171	1.117	NA
75855	2	34	3	4	1	1	169.8	79	27.4	97.7	0.824945	NA	52	NA	198	1.6	3.4	295	7.3	3	NA	NA	2	1	1	2	1	720	NA	0	0	0	2	0	0	0	0	0	0	NA	0	0	NA	2.87	3.33	NA	1.867	3.209	NA
110425	2	31	5	5	1	1	161.313	71.3	27.4	93.9	0.813449	262	35	92	179	2.5	5.4	414	7.2	3	NA	NA	2	1	1	1	0	300	NA	0	0	0	0	0	0	0	0	0	NA	NA	0	0	NA	0.8	0.35	NA	0.639	1.402	NA
114576	2	35	3	4	1	1	174.255	83.2	27.4	96.2	0.801829	50	58	95	163	1.9	3.1	229	7.2	1	NA	NA	2	1	2	2	0	60	NA	0	0	0	1	1	0	0	0	0	0	NA	0	0	NA	3.28	4.61	NA	1.107	2.161	NA
117081	2	39	3	5	1	2	158.229	68.6	27.4	91.2	0.797721	NA	109	NA	294	2.6	4.2	381	6.4	1	NA	NA	2	1	2	2	0	600	NA	0	0	1	1	0	0	0	0	0	0	NA	7.7	18.5	NA	2.01	4.53	NA	1.905	1.776	NA
77698	2	30	3	4	1	1	165.114	74.7	27.4	92.6	0.792899	NA	64	NA	185	1.8	3.7	201	7	3	NA	NA	2	1	4	2	0	300	NA	0	0	0	1	0	0	0	0	0	0	NA	0	0	NA	5.7	1.26	NA	1.765	0.49	NA
74945	2	36	3	4	1	1	161.426	71.4	27.4	91.2	0.789783	71	62	106	182	2.1	3.2	291	6.3	1	NA	NA	2	1	5	2	0	480	NA	0	1	1	2	0	1	0	0	0	1	NA	0	0	NA	7.23	2.86	NA	1.956	0.37	NA
109975	2	39	4	5	1	2	160.633	70.7	27.4	89.3	0.775236	72	44	134	192	1.6	1.8	297	7.3	1	NA	NA	2	1	2	2	0	600	NA	1	1	1	1	0	0	1	0	0	1	NA	0	0	NA	2.85	1.43	NA	1.863	1.674	NA
77153	2	29	3	4	1	1	163.783	73.5	27.4	89.2	0.766885	NA	37	NA	162	2.7	6	223	7	1	NA	NA	2	1	6	2	0	120	NA	0	0	0	0	0	0	0	0	0	NA	NA	0	0	NA	2.27	1.1	NA	1.025	1.254	NA
83871	2	30	1	1	1	1	139.995	53.7	27.4	82.4	0.766251	NA	71	NA	167	2.3	3.4	221	7.1	3	NA	NA	2	1	5	2	0	60	NA	2	0	1	1	0	0	0	0	0	1	NA	0	0	NA	6.91	8.29	NA	2.258	2.426	NA
79545	2	33	1	1	3	1	155.437	66.2	27.4	86.5	0.763377	NA	54	NA	129	2.6	4.7	204	7.4	3	NA	NA	2	1	5	2	0	300	NA	1	1	1	1	1	1	0	3	1	1	NA	0	NA	NA	1.18	NA	NA	1.769	NA	NA
77340	2	39	3	4	1	2	154.495	65.4	27.4	85.7	0.758619	NA	61	NA	245	2.6	5	460	7.3	1	NA	NA	2	1	2	2	0	360	NA	0	0	0	2	0	0	0	0	0	0	NA	0	0	NA	0.79	0.87	NA	1.615	2.631	NA
89012	2	24	3	4	3	1	165.666	75.2	27.4	87	0.743707	31	59	69	134	1.8	2.6	186	6.4	1	NA	NA	2	1	4	2	0	300	NA	0	1	0	0	0	0	0	0	0	0	NA	38.4	NA	NA	4.01	NA	NA	1.591	NA	NA
80535	2	25	3	4	1	1	166.41	75.6	27.3	101	0.863555	55	70	128	209	2.5	3.4	220	7.5	1	NA	NA	2	1	1	2	0	540	NA	0	0	2	2	0	0	1	0	0	0	NA	0	14	NA	5.36	11.44	NA	0.941	3.747	NA
114870	2	34	4	3	3	1	166.959	76.1	27.3	98.5	0.840793	NA	51	NA	168	2.1	2.1	179	6.7	1	NA	NA	2	1	7	2	0	180	NA	1	0	0	2	1	0	0	0	0	0	NA	37.1	25.4	NA	2.82	7.51	NA	1.651	3.008	NA
80442	2	41	1	2	1	3	151.79	62.9	27.3	93.8	0.839729	44	51	103	163	1.6	4.3	277	7.6	3	NA	NA	2	1	3	2	0	480	NA	0	0	0	0	0	0	0	0	0	NA	NA	0	0	NA	1.04	4.79	NA	1.781	1.539	NA
76496	2	23	1	2	2	1	151.186	62.4	27.3	91.4	0.819877	63	43	65	121	2.2	4.7	285	7.7	1	NA	NA	2	1	3	2	0	420	NA	1	0	1	1	1	0	0	0	0	1	NA	168.5	0	NA	3.47	6.71	NA	2.872	2.278	NA
113210	2	37	4	5	1	2	163.075	72.6	27.3	93.6	0.808427	NA	NA	NA	NA	NA	NA	NA	NA	1	NA	NA	2	1	5	2	0	180	NA	2	2	2	0	2	0	0	0	0	0	NA	22.3	19.1	NA	7.97	1.73	NA	3.488	2.994	NA
117966	2	26	5	4	1	1	158.519	68.6	27.3	90.7	0.794557	NA	52	NA	171	2.4	4.8	419	7.1	1	NA	NA	2	1	1	2	0	240	NA	0	1	1	1	1	1	1	1	0	0	NA	0	0	NA	0.49	1.97	NA	0.995	0.361	NA
78013	2	45	4	4	1	1	170.756	79.6	27.3	91.5	0.77231	NA	41	NA	182	2.3	5.3	374	7.1	1	NA	NA	2	1	4	2	0	240	NA	0	0	0	0	0	0	0	0	0	NA	NA	13.2	0	NA	3.91	5.89	NA	1.074	0.786	NA
121374	2	45	4	4	1	1	176.349	84.9	27.3	92.5	0.76827	NA	NA	NA	NA	2.3	7	214	NA	1	NA	NA	2	1	2	2	0	600	NA	1	0	0	0	0	0	0	0	0	0	NA	0	0	NA	1.16	4.51	NA	0.774	1.842	NA
73619	2	36	1	3	3	1	172.993	81.7	27.3	91.1	0.763944	67	57	92	162	2.5	3.7	242	7.5	1	NA	NA	2	1	2	2	0	120	NA	1	1	1	2	0	0	1	0	0	1	NA	0	0	NA	4.7	6.58	NA	2.883	4.818	NA
74191	2	39	4	4	3	1	162.287	71.9	27.3	88.2	0.763634	39	55	117	180	2.2	2.7	236	6.7	1	NA	NA	2	1	3	2	0	600	NA	2	1	2	0	1	0	0	1	0	0	NA	9.3	0	NA	14.53	0.73	NA	4.812	2.057	NA
78360	2	38	4	2	1	1	154.777	65.4	27.3	85.6	0.758889	NA	59	NA	111	5.7	3.2	227	7.1	1	NA	NA	2	1	6	2	0	660	NA	0	0	0	1	0	1	0	1	0	0	NA	20.5	0	NA	3.66	3.2	NA	1.41	1.284	NA
118554	2	40	1	4	1	1	151.065	62.3	27.3	82.2	0.737647	NA	57	NA	150	1.9	2.5	228	6.9	1	NA	NA	2	1	1	2	0	180	NA	0	0	0	0	0	0	0	0	0	NA	NA	0	NA	NA	4.05	NA	NA	1.259	NA	NA
110528	2	39	4	5	1	1	164.528	73.9	27.3	85	0.730898	NA	63	NA	179	1.1	2.6	316	7.8	1	NA	NA	2	1	7	2	0	300	NA	0	0	0	0	0	0	0	0	0	NA	NA	0	0	NA	1.08	0.2	NA	0.244	0.416	NA
91026	2	45	4	5	2	1	160.585	70.4	27.3	81	0.705003	NA	44	NA	168	2.2	1.6	330	8.3	1	NA	NA	2	1	5	2	0	600	NA	0	0	1	0	0	0	0	0	0	0	NA	38.2	37.2	NA	3.88	3.75	NA	1.49	1.134	NA
91714	2	35	5	4	1	1	162.811	72.1	27.2	108.6	0.941042	180	86	173	295	1.9	7.2	178	6.4	1	NA	NA	2	1	2	2	0	180	NA	1	0	0	1	0	0	0	0	0	0	NA	0	0	NA	1.21	5.11	NA	1.567	2.031	NA
109373	2	30	3	4	3	1	157.181	67.2	27.2	94.6	0.83428	NA	52	NA	201	1.5	2.8	261	5.8	1	NA	NA	1	1	3	2	0	180	NA	0	0	0	0	0	0	0	0	0	NA	NA	0	0	NA	1.94	2.98	NA	1.132	3.078	NA
114612	2	40	4	4	2	1	162.472	71.8	27.2	95.7	0.830126	NA	58	NA	220	2.1	2.7	371	7.5	1	NA	NA	2	1	1	2	0	540	NA	0	0	0	1	0	0	0	0	0	0	NA	0	0	NA	1.34	0.24	NA	1.333	0.55	NA
83828	2	39	1	3	1	1	161.905	71.3	27.2	94.6	0.822019	101	55	114	189	1.5	4.8	166	6.8	1	NA	NA	2	1	4	2	0	120	NA	1	0	1	1	0	0	0	0	0	0	NA	0	0	NA	2.31	3.04	NA	0.806	1.397	NA
122063	2	44	3	4	2	1	164.719	73.8	27.2	95.4	0.821859	143	47	116	192	2.4	7.2	188	6.8	1	NA	NA	2	1	3	2	0	240	NA	0	0	0	0	0	0	0	0	0	NA	NA	0	NA	NA	3.33	NA	NA	1.425	NA	NA
89820	2	35	1	5	1	1	157.765	67.7	27.2	91.4	0.804567	56	83	87	181	1.8	4.2	169	6.9	3	NA	NA	2	1	2	2	0	540	NA	0	0	0	2	1	0	1	0	0	0	NA	0	0	NA	11.3	7	NA	4.144	2.329	NA
118701	2	45	5	4	1	1	171.069	79.6	27.2	94.6	0.799698	NA	70	NA	177	2.9	3	452	7	1	NA	NA	2	1	5	2	0	600	NA	1	2	1	1	0	1	0	0	0	1	NA	27.2	0	NA	1.45	2.05	NA	1.555	1.235	NA
76608	2	38	1	4	1	3	155.771	66	27.2	89.7	0.794638	NA	47	NA	223	3.3	6.1	283	7.2	1	NA	NA	2	1	5	2	0	480	NA	1	1	1	1	1	1	0	0	0	0	NA	0	16.1	NA	0.78	2.56	NA	0.507	1.285	NA
110811	2	45	2	4	1	1	159.618	69.3	27.2	89.8	0.78588	NA	71	NA	228	2.9	3.4	345	7.7	3	NA	NA	2	1	2	2	0	120	NA	0	0	1	0	1	0	0	0	0	0	NA	0	NA	NA	0.66	NA	NA	0.6	NA	NA
109579	2	42	3	4	1	1	161.791	71.2	27.2	89.5	0.777976	NA	42	NA	184	3	6.4	297	7	1	NA	NA	2	1	3	2	0	120	NA	0	0	0	0	0	0	0	0	0	NA	NA	0	0	NA	10.89	26.39	NA	2.982	7.76	NA
81858	2	22	5	4	1	1	159.503	69.2	27.2	83.2	0.728383	NA	42	NA	151	2.1	5.5	219	6.7	1	NA	NA	2	1	2	2	0	540	NA	0	2	1	2	0	0	0	0	0	0	NA	7.4	14	NA	1.48	0.49	NA	0.728	0.706	NA
75790	2	28	1	4	1	1	161.062	70.3	27.1	99.8	0.871608	88	57	138	213	1.7	4.2	209	7.2	1	NA	NA	2	1	2	1	0	180	NA	0	0	1	1	0	0	0	0	0	0	NA	0	NA	NA	3.59	NA	NA	2.712	NA	NA
109979	2	31	5	5	1	1	159.219	68.7	27.1	98.6	0.866098	95	35	86	140	2.6	4.4	279	7.1	3	NA	NA	2	1	4	2	0	480	NA	0	0	0	0	0	0	0	0	0	NA	NA	0	0	NA	1.37	2.16	NA	1.01	0.728	NA
79293	2	30	2	4	1	1	160.718	70	27.1	98	0.856803	NA	37	NA	289	2.6	7.4	347	7.5	0	NA	NA	2	1	1	2	0	300	NA	0	0	1	1	0	0	0	1	0	0	NA	0	0	NA	3.32	1.74	NA	2.429	1.361	NA
82948	2	45	3	3	1	3	164.687	73.5	27.1	98.7	0.852462	NA	48	NA	182	3.7	5.1	228	6.6	0	NA	NA	2	1	3	2	1	180	NA	0	1	1	0	0	0	0	0	0	0	NA	0	0	NA	4.7	4.23	NA	0.592	1.348	NA
77424	2	40	5	5	1	1	157.471	67.2	27.1	94.2	0.832028	NA	52	NA	180	3.3	5.1	327	7.3	1	NA	NA	1	1	2	2	1	600	NA	0	0	0	0	0	1	0	0	0	0	NA	8.5	53.1	NA	6.04	4.09	NA	1.407	1.11	NA
113532	2	43	5	5	1	1	161.634	70.8	27.1	95.2	0.829962	NA	64	NA	179	2.5	3.6	268	7.3	3	NA	NA	2	1	4	2	0	300	NA	2	2	1	1	0	0	1	0	0	0	NA	0	0	NA	2.48	0.83	NA	2.177	1.545	NA
81932	2	24	4	2	1	1	171.169	79.4	27.1	97.2	0.823456	NA	62	NA	197	3.1	3.6	237	6.6	3	NA	NA	2	1	2	2	0	480	NA	0	0	0	0	0	0	0	0	0	NA	NA	0	0	NA	0.54	7.99	NA	0.692	2.36	NA
79549	2	37	3	4	3	1	159.681	69.1	27.1	93.8	0.82274	NA	78	NA	190	2.7	6.8	193	7.1	1	NA	NA	2	1	1	2	0	600	NA	0	1	0	0	0	0	0	0	0	0	NA	0	37.2	NA	10.49	12.32	NA	3.756	4.447	NA
78187	2	41	1	2	1	1	149.661	60.7	27.1	89.8	0.813596	NA	48	NA	135	1.6	5.1	203	7	3	NA	NA	2	1	3	2	0	300	NA	0	0	0	0	1	1	0	0	0	0	NA	0	0	NA	4.54	4.3	NA	2.501	1.48	NA
77141	2	42	1	1	2	1	153.074	63.5	27.1	90.8	0.813433	NA	53	NA	219	2.6	4.9	210	7.2	1	NA	NA	2	1	4	2	0	120	NA	0	0	1	1	0	0	0	0	0	0	NA	0	0	NA	5.96	5.74	NA	2.516	3.031	NA
92674	2	45	1	3	1	1	145.409	57.3	27.1	86.4	0.794154	192	54	144	236	2.6	4.6	239	7.9	3	NA	NA	1	1	2	2	0	100	NA	1	1	0	1	0	1	0	0	0	0	NA	0	0	NA	2	4.16	NA	1.592	1.618	NA
122790	2	28	3	5	1	1	164.013	72.9	27.1	91.2	0.789301	NA	70	NA	185	2.2	6.3	345	7.6	1	NA	NA	2	1	1	2	0	600	NA	0	0	0	0	1	0	0	0	0	0	NA	0	0	NA	1.95	1.4	NA	1.779	1.029	NA
92861	2	36	4	4	3	1	161.976	71.1	27.1	89.2	0.776832	NA	70	NA	176	1.9	3.9	198	7.7	3	NA	NA	2	1	3	2	0	420	NA	2	0	1	0	0	0	0	0	0	0	NA	0	0	NA	4.84	3.03	NA	1.339	1.435	NA
123151	2	38	3	4	1	1	165.469	74.2	27.1	89.9	0.774619	NA	64	NA	162	1.6	3.2	244	7.1	1	NA	NA	2	1	3	2	0	240	NA	0	0	0	0	0	0	0	0	0	NA	NA	NA	NA	NA	NA	NA	NA	NA	NA	NA
110819	2	35	1	3	2	1	157.939	67.6	27.1	87.6	0.772586	NA	47	NA	174	2	6.3	256	6.9	1	NA	NA	2	1	3	2	0	180	NA	0	1	0	1	1	1	1	0	0	0	NA	0	0	NA	10.19	5.3	NA	2.971	3.564	NA
120731	2	36	2	2	2	1	156.531	66.4	27.1	87	0.770738	209	50	162	254	2.1	2.4	235	6.6	1	NA	NA	1	1	3	2	0	30	NA	1	0	1	0	0	0	0	1	0	0	NA	0	0	NA	1.34	0.86	NA	0.902	0.397	NA
114695	2	38	2	1	1	3	153.676	64	27.1	86	0.768923	62	90	112	214	2.3	4.2	325	7.1	3	NA	NA	1	1	4	1	0	120	NA	0	0	0	0	0	0	0	0	0	NA	NA	0	NA	NA	0.14	NA	NA	1.605	NA	NA
112145	2	41	5	3	3	1	166.581	75.2	27.1	88	0.755714	NA	84	NA	202	3.5	4.1	239	7	1	NA	NA	2	1	4	2	0	120	NA	0	0	0	0	0	0	0	0	0	NA	NA	0	0	NA	1.7	3.07	NA	0.773	0.764	NA
122653	2	35	3	5	1	2	171.378	79.3	27	102.6	0.870818	170	93	192	319	1.8	5.8	274	6.1	0	NA	NA	2	1	4	2	0	180	NA	3	0	0	0	0	0	0	0	0	0	NA	0	0	NA	5.33	4.49	NA	1.981	2.984	NA
75428	2	44	5	5	1	1	161.818	70.7	27	96.6	0.843763	42	65	97	170	1.9	4.8	292	7	1	NA	NA	2	1	3	2	0	240	NA	3	0	0	0	0	0	0	0	0	0	NA	0	0	NA	3.01	0.08	NA	2.091	1.929	NA
112477	2	34	1	2	1	3	157.292	66.8	27	94.7	0.838985	79	52	88	156	2	3.5	243	7.6	3	NA	NA	2	1	2	2	0	300	NA	0	0	0	0	0	0	0	0	0	NA	NA	0	0	NA	2.05	4.86	NA	1.275	1.969	NA
87895	2	37	3	1	1	1	163.526	72.2	27	95.5	0.829789	49	61	83	154	3.6	3.5	249	6.8	1	NA	NA	2	1	3	2	0	420	NA	3	3	3	3	3	3	3	3	0	3	NA	0	0	NA	36.96	22.81	NA	40.357	24.503	NA
116704	2	29	3	4	1	1	149.567	60.4	27	91.2	0.828579	NA	65	NA	228	3.3	5	251	7.3	1	NA	NA	1	1	1	1	0	240	NA	0	2	0	2	0	0	0	0	0	0	NA	29.7	NA	NA	3.93	NA	NA	1.134	NA	NA
91396	2	36	3	4	1	1	159.745	68.9	27	92.6	0.814057	NA	62	NA	262	3.5	5.9	261	7.4	0	NA	NA	2	1	2	2	0	240	NA	0	0	1	1	1	0	0	0	0	0	NA	0	0	NA	2.19	11.45	NA	2.023	3.123	NA
88058	2	41	1	3	1	1	155.873	65.6	27	91.1	0.810757	NA	32	NA	153	1.5	2.5	225	8.3	3	NA	NA	2	1	3	2	0	180	NA	0	0	0	0	0	0	0	0	0	NA	NA	0	0	NA	1.32	7.46	NA	1.564	3.024	NA
81212	2	37	4	3	3	1	175.541	83.2	27	96.4	0.808434	52	63	91	164	2.5	5.4	251	6.8	1	NA	NA	2	1	5	2	0	360	NA	1	0	1	1	1	0	0	0	0	0	NA	46	0	NA	24.63	3.11	NA	4.846	1.442	NA
81953	2	22	3	4	1	1	160.439	69.5	27	91.8	0.805276	NA	53	NA	135	2.8	7.1	228	7.2	1	NA	NA	2	1	1	2	0	180	NA	0	0	0	1	0	0	0	0	0	0	NA	0	21.6	NA	5.99	3.02	NA	2.043	1.877	NA
110114	2	44	3	4	1	1	162.39	71.2	27	85	0.741135	NA	70	NA	155	2.2	3.8	195	6.7	1	NA	NA	2	1	2	2	0	300	NA	0	0	1	1	0	0	1	0	0	0	NA	0	0	NA	3.52	2.73	NA	2.696	2.486	NA
80633	2	30	4	2	3	1	158.815	68.1	27	83.5	0.736204	46	49	97	155	2.4	2.7	164	6.8	3	NA	NA	2	1	5	2	0	300	NA	0	0	0	0	0	0	1	0	0	0	NA	0	NA	NA	3.38	NA	NA	1.909	NA	NA
113078	2	32	3	5	1	2	171.378	79.3	27	86.7	0.735867	NA	89	NA	181	2.4	5.3	246	7.8	1	NA	NA	2	1	3	2	0	720	NA	1	1	2	2	0	0	0	0	0	1	NA	46.8	64.1	NA	5.92	3.66	NA	2.446	3.09	NA
78335	2	27	1	4	2	1	162.731	71.5	27	83	0.722936	NA	88	NA	169	1.2	5.9	244	7.3	1	NA	NA	2	1	1	1	0	720	NA	0	0	0	0	0	0	0	0	0	NA	NA	0	0	NA	2.67	2.56	NA	1.112	1.793	NA
85437	2	34	4	4	2	1	166.556	74.9	27	83.7	0.720615	NA	64	NA	149	3.2	5.5	284	6.7	1	NA	NA	2	1	2	2	0	720	NA	0	0	0	0	0	0	0	0	0	NA	NA	0	0	NA	4.22	10.28	NA	0.836	1.92	NA
121311	2	38	2	4	1	1	157.997	67.4	27	80.1	0.708053	NA	34	NA	170	2.2	8.2	240	6.9	1	NA	NA	2	1	3	2	0	180	NA	0	0	0	1	0	0	0	0	0	0	NA	0.6	0	NA	3.8	0.74	NA	0.837	0.593	NA
75291	2	24	4	2	3	1	161.199	69.9	26.9	103.6	0.908888	NA	40	NA	204	1.4	5.3	201	5.8	1	NA	NA	2	1	5	1	0	720	NA	1	1	2	2	0	0	0	1	0	0	NA	0	0	NA	23.21	5.75	NA	3.34	2.817	NA
91043	2	44	3	4	2	1	169.627	77.4	26.9	98.4	0.84155	NA	47	NA	201	3	5.7	269	6.8	1	NA	NA	2	1	3	2	0	900	NA	1	2	2	0	2	1	1	2	2	3	NA	0	57.2	NA	1.13	1.66	NA	0.455	1.071	NA
122946	2	36	3	5	1	3	156.875	66.2	26.9	94.2	0.837734	NA	98	NA	259	1.6	7.6	279	6.6	1	NA	NA	2	1	4	1	1	240	NA	3	0	1	1	3	0	0	0	0	1	NA	0	NA	NA	2.87	NA	NA	2.772	NA	NA
114633	2	35	2	5	1	1	163.943	72.3	26.9	94.6	0.822956	119	39	61	124	1.9	5.2	338	7.1	1	NA	NA	2	1	1	2	0	120	NA	1	0	0	1	0	0	0	0	0	0	NA	0	0	NA	2.83	2.58	NA	2.744	2.907	NA
116721	2	35	1	4	1	1	156.4	65.8	26.9	92.3	0.822082	111	58	116	196	2	3.6	320	7.2	1	NA	NA	2	1	4	2	0	240	NA	0	0	0	1	0	1	0	0	0	0	NA	0	0	NA	2.35	1.77	NA	0.909	1.618	NA
109697	2	35	1	4	3	1	158.173	67.3	26.9	92.6	0.820119	108	48	127	197	2.3	7	337	7.6	1	NA	NA	2	1	4	1	0	420	NA	0	0	0	1	0	0	0	0	0	0	NA	0	0	NA	4.18	2.41	NA	2.662	3.227	NA
76796	2	42	3	4	1	1	156.162	65.6	26.9	91.8	0.818251	NA	66	NA	166	3.1	5	214	7.4	1	NA	NA	2	1	3	2	0	120	NA	1	0	2	3	1	1	1	1	0	1	NA	0	0	NA	2.41	0.51	NA	1.029	0.816	NA
90573	2	34	1	3	1	1	166.976	75	26.9	94.9	0.818033	NA	58	NA	196	1.8	2.8	237	7	1	NA	NA	2	1	3	2	0	120	NA	0	0	0	0	0	0	0	0	0	NA	NA	0	NA	NA	6.66	NA	NA	3.482	NA	NA
113551	2	37	1	5	2	1	167.199	75.2	26.9	94.2	0.811459	NA	66	NA	159	2.1	4.7	237	7.4	1	NA	NA	2	1	2	2	0	420	NA	0	0	1	1	0	1	0	0	0	0	NA	0	0	NA	9.24	4.59	NA	3.167	1.466	NA
74563	2	40	3	4	1	1	158.055	67.2	26.9	90	0.797389	102	52	155	227	1.7	5.8	193	6.6	1	NA	NA	2	1	4	2	0	540	NA	1	1	0	2	0	1	0	1	0	0	NA	14	28.1	NA	8.3	8.95	NA	3.738	2.897	NA
91290	2	39	5	5	1	1	153.521	63.4	26.9	87.3	0.784805	151	52	79	161	2.1	2.2	187	8.4	0	NA	NA	2	1	2	2	0	300	NA	0	1	0	1	0	1	0	0	0	0	NA	0	0	NA	10.51	9.01	NA	4.483	0.696	NA
83041	2	32	3	5	1	1	163.147	71.6	26.9	89	0.776125	NA	42	NA	176	2.3	4	424	7.1	3	NA	NA	2	1	2	2	0	720	NA	0	1	0	1	1	1	0	0	0	1	NA	0	0	NA	7.16	6.08	NA	3.229	2.275	NA
77446	2	26	3	3	1	1	158.642	67.7	26.9	87.4	0.772919	NA	63	NA	197	3.1	9.5	305	7	1	NA	NA	2	1	3	2	0	300	NA	3	2	3	3	0	2	3	0	0	1	NA	0	0	NA	1.38	0.29	NA	1.022	1.47	NA
113891	2	40	5	5	1	1	165.185	73.4	26.9	89	0.771322	58	65	101	178	1.6	3.1	267	7.2	1	NA	NA	2	1	6	2	1	540	NA	3	2	3	3	3	3	1	0	1	2	NA	0	0	NA	3.19	3.17	NA	1.635	0.996	NA
89348	2	43	4	4	1	1	166.642	74.7	26.9	86.7	0.748099	NA	84	NA	169	1.7	2.8	246	7.3	1	NA	NA	2	1	4	1	0	420	NA	0	0	0	0	0	0	0	0	0	NA	NA	18.5	45.9	NA	2.01	8.65	NA	0.977	2.775	NA
74814	2	25	3	3	1	1	168.086	76	26.9	87	0.747456	NA	60	NA	192	2	5	285	7.1	1	NA	NA	2	1	1	2	0	240	NA	0	0	2	1	1	0	0	0	0	0	NA	0	0	NA	4.56	3.8	NA	1.755	0.892	NA
75066	2	44	4	5	1	2	161.084	69.8	26.9	83.5	0.732812	42	83	72	163	1.4	2.2	146	6.7	1	NA	NA	2	1	2	1	0	480	NA	0	0	0	0	0	0	0	0	0	NA	NA	0	0	NA	8.14	1.67	NA	1.943	0.695	NA
118220	2	39	4	4	1	1	157.466	66.7	26.9	78.6	0.697688	28	65	149	220	2.2	1.7	248	6.7	3	NA	NA	2	1	3	2	0	30	NA	3	0	0	0	0	0	0	0	0	0	NA	0	0	NA	1.37	1.45	NA	0.864	1.018	NA
85537	2	25	2	5	3	1	163.603	72	26.9	79.4	0.691444	28	42	72	120	2.5	3.9	225	7.3	1	NA	NA	2	1	1	2	0	420	NA	0	0	0	0	0	0	0	0	0	NA	NA	0	0	NA	4.29	1.08	NA	0.809	1.776	NA
88707	2	23	4	2	3	1	151.485	61.5	26.8	94.5	0.857347	69	62	121	197	3.2	3.2	317	7.2	1	NA	NA	2	1	3	2	0	300	NA	0	3	3	3	3	3	3	3	0	3	NA	0	0	NA	0.4	0.38	NA	0.687	0.639	NA
124249	2	32	3	5	1	2	166.952	74.7	26.8	97.5	0.842594	98	49	80	149	2	3.1	247	7.3	0	NA	NA	2	1	3	2	0	180	NA	0	0	0	0	0	0	0	0	0	NA	NA	0	0	NA	2.37	6.94	NA	0.66	2.447	NA
93306	2	43	5	4	1	1	159.64	68.3	26.8	94.6	0.836045	NA	51	NA	197	2.6	4.6	367	7.5	3	NA	NA	2	1	2	2	0	180	NA	0	0	0	0	0	0	0	0	0	NA	NA	0	0	NA	2.95	1.98	NA	1.337	2.217	NA
87244	2	29	5	5	1	1	159.64	68.3	26.8	89.1	0.787438	142	87	131	246	1.9	4.2	158	6.2	1	NA	NA	2	1	1	2	0	660	NA	0	0	2	2	1	0	0	0	0	0	NA	0	0	NA	1.24	1.74	NA	0.739	3.754	NA
124026	2	24	1	5	1	3	153.686	63.3	26.8	86.1	0.775525	NA	55	NA	154	2.4	4.1	340	7.3	1	NA	NA	2	1	1	2	0	180	NA	0	0	0	0	1	0	0	0	0	0	NA	0	0	NA	1.8	5.49	NA	1.293	2.136	NA
81708	2	38	3	5	3	1	163.566	71.7	26.8	87.8	0.766582	NA	54	NA	130	3.2	6.9	345	7.3	3	NA	NA	2	1	2	2	0	480	NA	0	0	0	0	0	0	0	0	0	NA	NA	0	0	NA	2.21	6.93	NA	1.316	2.908	NA
92745	2	23	1	4	1	1	160.456	69	26.8	86.9	0.76604	NA	62	NA	124	1.8	6.5	338	7.5	0	NA	NA	2	1	2	2	0	360	NA	3	2	3	3	1	2	1	2	0	1	NA	0	0	NA	6.66	3.02	NA	3.831	2.13	NA
80350	2	31	4	4	3	3	172.882	80.1	26.8	89.3	0.758381	NA	48	NA	123	4.8	6.1	325	6.9	1	NA	NA	2	1	7	2	0	480	NA	0	1	0	1	0	1	0	0	0	0	NA	0	0	NA	6.51	7.7	NA	2.651	1.69	NA
75872	2	21	4	3	1	1	157.404	66.4	26.8	84.6	0.75296	38	64	61	133	NA	NA	256	6.7	1	NA	NA	2	1	2	2	0	600	NA	1	2	3	3	3	1	1	1	0	1	NA	0	0	NA	0.65	0.62	NA	1.688	0.47	NA
84619	2	41	5	2	1	1	155.376	64.7	26.8	83.4	0.747109	134	37	143	207	1.9	3	213	6.7	1	NA	NA	2	1	2	2	0	180	NA	0	0	0	0	0	0	0	0	0	NA	NA	NA	NA	NA	NA	NA	NA	NA	NA	NA
112931	2	42	4	4	1	1	168.399	76	26.8	85.6	0.73657	63	52	113	178	1.5	2.3	161	7.3	1	NA	NA	3	1	3	2	0	480	NA	0	0	0	0	0	0	0	0	0	NA	NA	0	0	NA	0.49	0.31	NA	1.452	2.043	NA
122254	2	32	3	3	1	1	155.016	64.4	26.8	76.4	0.685197	NA	46	NA	125	3.1	4.8	291	7	1	NA	NA	2	1	8	2	0	480	NA	0	1	1	1	3	1	0	0	0	0	NA	0	0	NA	1.59	4.58	NA	0.278	0.929	NA
92412	2	40	3	5	1	2	164.442	72.2	26.7	101.6	0.88691	NA	54	NA	202	2.1	4.2	283	7.5	1	NA	NA	2	1	5	2	1	360	NA	0	0	0	0	0	0	0	0	0	NA	NA	47.8	57.2	NA	1.02	1.93	NA	1.18	1.42	NA
84248	2	29	4	4	1	1	163.529	71.4	26.7	97.5	0.853494	NA	70	NA	151	1.7	3	273	7.5	1	NA	NA	2	1	1	2	0	60	NA	0	0	0	0	0	0	0	0	0	NA	NA	0	0	NA	0.42	0.34	NA	1.599	0.231	NA
116769	2	40	1	3	1	1	153.852	63.2	26.7	94.5	0.85285	NA	37	NA	150	2.3	6.9	239	7.2	3	NA	NA	2	1	2	2	0	60	NA	0	0	0	0	0	0	0	0	0	NA	NA	0	0	NA	5.19	5.77	NA	1.772	1.679	NA
78691	2	42	4	4	1	1	166.141	73.7	26.7	97.2	0.84415	67	62	81	156	3.2	2.1	169	7	1	NA	NA	2	1	3	2	0	480	NA	0	0	1	1	3	0	0	0	0	0	NA	14	0	NA	0.08	0.74	NA	0.178	0.807	NA
80718	2	36	3	4	1	1	163.757	71.6	26.7	95	0.831028	NA	100	NA	243	2.5	3.9	214	7.7	1	NA	NA	2	1	5	2	1	300	NA	2	1	0	2	1	1	0	1	0	1	NA	65.5	76.4	NA	4.77	4.28	NA	0.894	3.079	NA
114631	2	37	3	5	1	1	170.92	78	26.7	95.5	0.817711	77	57	101	173	1.2	4.1	172	7	1	NA	NA	2	1	1	2	0	480	NA	0	1	0	1	1	1	0	0	0	1	NA	0	0	NA	7.18	4.66	NA	2.358	2.04	NA
76950	2	36	3	5	1	1	164.328	72.1	26.7	91.5	0.79902	57	55	116	182	2.2	4.1	172	7	1	NA	NA	2	1	3	2	0	180	NA	0	0	0	1	0	0	0	0	0	0	NA	24.8	0	NA	4.6	4.37	NA	1.495	2.222	NA
92428	2	33	5	5	1	2	153.852	63.2	26.7	87.5	0.789676	NA	42	NA	225	4.7	5.3	417	7.8	3	NA	NA	2	1	1	2	0	480	NA	0	0	0	0	0	0	0	0	0	NA	NA	0	0	NA	2.42	8.87	NA	4.381	4.228	NA
114578	2	41	4	3	1	1	173.745	80.6	26.7	91.6	0.777915	NA	34	NA	148	2.1	6.5	281	7.8	1	NA	NA	2	1	4	2	0	240	NA	0	0	3	0	0	0	0	0	0	0	NA	0	0	NA	1.62	8.11	NA	1.05	8.567	NA
79060	2	31	3	5	1	2	170.261	77.4	26.7	90	0.772107	31	52	75	133	1.8	2.4	219	7.4	1	NA	NA	2	1	2	2	0	300	NA	0	0	0	1	0	0	0	0	0	0	NA	24.8	0	NA	3.93	5.3	NA	2.006	2.19	NA
111695	2	30	2	4	2	1	164.214	72	26.7	88	0.768723	NA	49	NA	175	2.2	3.1	298	7.6	1	NA	NA	2	1	2	2	0	360	NA	0	0	0	1	0	0	0	0	0	0	NA	0	0	NA	1.51	2.07	NA	1.639	1.402	NA
74557	2	28	3	5	1	1	153.974	63.3	26.7	84.5	0.7623	43	54	90	153	1.7	4.6	167	6.5	1	NA	NA	2	1	3	2	0	540	NA	0	0	1	1	0	0	0	0	0	0	NA	0	0	NA	4.6	3.32	NA	3.415	1.953	NA
78225	2	40	1	2	1	1	152.015	61.7	26.7	83.2	0.755392	42	65	59	132	1.8	2.3	226	7.3	0	NA	NA	2	1	3	2	0	180	NA	1	0	0	0	0	0	0	0	0	1	NA	0	0	NA	0.84	7.14	NA	1.146	1.193	NA
80055	2	44	2	2	1	1	175.033	81.8	26.7	88.5	0.748816	110	48	103	173	2.8	4.4	265	7.8	1	NA	NA	2	1	3	2	0	240	NA	0	0	0	0	0	0	0	0	0	NA	NA	0	0	NA	0.46	0.88	NA	1.423	0.851	NA
85958	2	32	3	4	1	1	174.503	81	26.6	108.4	0.920889	246	37	139	225	1.9	6.4	378	7.6	3	NA	NA	2	1	3	2	0	660	NA	0	1	0	1	1	0	0	0	0	0	NA	0	0	NA	10.21	10.82	NA	2.319	3.766	NA
114093	2	44	4	4	1	1	172.553	79.2	26.6	98.9	0.844918	NA	42	NA	145	1.8	2	168	8.2	3	NA	NA	2	1	2	2	0	240	NA	0	0	0	1	0	0	0	0	0	0	NA	0	0	NA	4.2	3.54	NA	1.835	1.405	NA
87913	2	26	3	2	1	1	168.474	75.5	26.6	96	0.830011	37	56	91	154	2	3.9	184	6.9	3	NA	NA	2	1	1	2	0	480	NA	0	0	0	1	0	0	0	0	0	0	NA	0	NA	NA	4.86	NA	NA	1.764	NA	NA
86123	2	36	3	5	1	2	167.803	74.9	26.6	95.6	0.828203	NA	58	NA	140	2.5	5.5	195	6.8	1	NA	NA	2	1	4	1	1	600	NA	0	0	1	1	0	0	0	0	0	0	NA	0	0	NA	6.38	8.43	NA	2.327	3.186	NA
92748	2	41	4	4	2	1	163.836	71.4	26.6	93.6	0.820636	64	71	129	213	2.3	2.1	186	6.8	1	NA	NA	2	1	4	1	0	600	NA	0	2	1	3	2	1	0	0	0	1	NA	42.2	34	NA	2.24	3.56	NA	1.504	2.379	NA
122512	2	37	5	5	1	2	162.337	70.1	26.6	91.2	0.803276	NA	60	NA	189	3.8	4.5	289	7	3	NA	NA	2	1	4	1	0	360	NA	0	0	0	2	0	0	0	0	0	0	NA	0	0	NA	2.19	8.19	NA	1.099	1.781	NA
85492	2	22	3	4	1	1	164.408	71.9	26.6	90.2	0.789448	NA	47	NA	148	2.6	7.4	298	7	3	NA	NA	2	1	2	2	0	240	NA	0	0	0	0	0	0	0	0	0	NA	NA	0	NA	NA	4.85	NA	NA	2.271	NA	NA
87330	2	36	3	3	1	1	158.233	66.6	26.6	86.6	0.772589	NA	67	NA	194	2.6	5.4	276	7.1	3	NA	NA	2	1	4	2	0	180	NA	1	2	1	1	1	1	2	1	0	1	NA	0	0	NA	8.6	1.7	NA	2.221	1.881	NA
121213	2	24	5	4	3	1	169.142	76.1	26.6	88.8	0.766242	105	48	73	142	2.3	2.6	228	7.1	1	NA	NA	2	1	1	2	0	420	NA	1	1	1	0	0	0	1	1	0	1	NA	36.4	NA	NA	2.69	NA	NA	1.211	NA	NA
114355	2	42	4	5	1	2	162.453	70.2	26.6	84.3	0.742237	NA	NA	NA	NA	1.4	6.7	261	NA	1	NA	NA	2	1	2	2	0	600	NA	1	0	0	2	0	0	0	0	0	0	NA	14.4	0	NA	1.73	5.52	NA	1.674	2.876	NA
120985	2	44	4	5	2	3	169.586	76.5	26.6	84.2	0.725598	NA	NA	NA	NA	NA	NA	NA	NA	1	NA	NA	2	1	5	2	0	420	NA	0	0	0	1	0	0	0	0	0	0	NA	0	0	NA	2.73	1.59	NA	3.558	1.466	NA
80347	2	44	2	3	1	3	153.652	62.8	26.6	80	0.724268	117	47	123	193	1.9	4.7	205	6.8	3	NA	NA	2	1	2	2	0	120	NA	0	0	0	1	0	0	0	0	0	0	NA	0	0	NA	0.4	7.94	NA	0.536	1.497	NA
86908	2	41	1	3	1	2	156.615	65	26.5	92	0.827066	268	35	162	251	3.4	2.3	321	7	3	NA	NA	2	1	1	2	0	480	NA	0	0	0	0	0	0	0	0	0	NA	NA	0	0	NA	0.4	4.11	NA	0.898	0.915	NA
80235	2	44	5	3	1	1	160.776	68.5	26.5	93	0.825166	NA	39	NA	195	4	5.7	291	7.8	1	NA	NA	2	1	2	1	0	540	NA	0	0	0	0	0	0	0	0	0	NA	NA	0	0	NA	1.28	1.84	NA	1.356	2.924	NA
78814	2	42	1	2	1	1	153.697	62.6	26.5	90	0.816732	81	42	133	191	2	2.6	232	7	1	NA	NA	2	1	2	2	0	180	NA	0	1	1	1	0	1	0	1	0	0	NA	0	0	NA	5.77	3.95	NA	2.644	1.83	NA
80280	2	31	1	2	1	1	148.069	58.1	26.5	87.2	0.80622	NA	42	NA	125	3.4	3.9	293	6.7	1	NA	NA	2	1	4	2	0	300	NA	0	0	0	0	0	0	0	0	0	NA	NA	0	0	NA	3.24	4.38	NA	1.362	1.854	NA
77006	2	34	2	3	1	1	161.596	69.2	26.5	90.6	0.80183	NA	54	NA	199	1.5	3.8	319	7.1	1	NA	NA	2	1	1	2	0	180	NA	3	3	3	3	3	3	0	1	0	3	NA	11.2	0	NA	2.13	2.83	NA	0.721	1.238	NA
113445	2	37	1	1	1	1	162.527	70	26.5	90.2	0.796	189	51	143	232	1.6	4.1	309	6.8	1	NA	NA	2	1	3	2	0	300	NA	0	0	1	1	0	0	0	1	0	1	NA	55.4	0	NA	1.29	2.85	NA	1.996	1.896	NA
123079	2	40	3	5	2	1	167.67	74.5	26.5	91.4	0.794123	91	48	152	218	2	3.8	246	6.8	1	NA	NA	2	1	3	2	0	300	NA	0	0	0	1	0	1	0	0	0	0	NA	0	0	NA	3.78	2.13	NA	1.521	1.028	NA
114333	2	21	3	4	1	1	164.604	71.8	26.5	89.5	0.784825	NA	34	NA	178	2.6	4	260	7.4	1	NA	NA	2	1	3	2	0	1080	NA	0	0	0	2	0	0	0	0	0	0	NA	0	0	NA	4.66	3.66	NA	1.08	1.024	NA
86009	2	33	3	4	1	1	168.903	75.6	26.5	90.3	0.781697	NA	52	NA	176	3.1	4.3	221	6.6	1	NA	NA	2	1	4	2	1	720	NA	0	0	0	0	0	0	0	0	0	NA	NA	0	0	NA	1.86	0.49	NA	0.397	0.762	NA
119759	2	36	2	2	2	3	152.34	61.5	26.5	85.6	0.780254	NA	50	NA	164	2.5	3.5	252	7.3	1	NA	NA	2	1	3	2	0	80	NA	1	2	1	1	1	0	0	0	0	0	NA	NA	NA	NA	NA	NA	NA	NA	NA	NA
122478	2	42	5	5	1	2	161.128	68.8	26.5	86.2	0.763996	86	38	109	164	2.4	3.8	319	6.4	3	NA	NA	2	1	4	2	0	480	NA	0	0	2	0	2	0	0	0	0	0	NA	18.7	0	NA	1.39	0.86	NA	1.082	1.748	NA
92657	2	24	1	1	1	1	151.72	61	26.5	83.4	0.761754	NA	51	NA	169	2	8.7	263	7.1	3	NA	NA	2	1	2	2	0	240	NA	1	0	0	1	0	0	0	0	0	0	NA	0	0	NA	1.04	3.08	NA	1.597	1.965	NA
84323	2	21	4	4	3	1	161.713	69.3	26.5	85.2	0.753767	NA	58	NA	166	2.1	3.6	248	7.6	1	NA	NA	2	1	1	2	0	1080	NA	2	0	0	1	0	0	0	0	0	0	NA	0	NA	NA	4.2	NA	NA	0.655	NA	NA
88087	2	29	5	1	1	3	151.595	60.9	26.5	82.1	0.750187	NA	NA	NA	NA	NA	NA	NA	NA	3	NA	NA	2	1	4	2	0	120	NA	0	0	0	0	0	0	0	0	0	NA	NA	NA	NA	NA	NA	NA	NA	NA	NA	NA
114448	2	40	3	5	1	1	157.935	66.1	26.5	83	0.743034	NA	73	NA	203	1.3	4.8	194	7.2	1	NA	NA	2	1	2	2	0	240	NA	0	0	1	1	0	0	0	0	0	0	NA	0	NA	NA	2.44	NA	NA	0.734	NA	NA
89276	2	45	1	2	1	1	156.615	65	26.5	81.4	0.731774	NA	46	NA	217	2	3.9	355	7.1	3	NA	NA	2	1	5	2	0	180	NA	0	0	0	0	1	0	1	0	0	0	NA	0	NA	NA	4.42	NA	NA	1.794	NA	NA
119989	2	33	4	5	1	1	153.451	62.4	26.5	78.9	0.716575	NA	80	NA	222	1.9	4.1	248	7.1	1	NA	NA	2	1	1	2	0	300	NA	0	0	0	0	0	0	0	0	0	NA	NA	8	0	NA	2.23	2.56	NA	1.228	1.255	NA
121534	2	38	4	5	2	1	169.683	76.3	26.5	82.7	0.714258	10	78	54	134	1.7	2.7	220	7.1	1	NA	NA	2	1	2	2	0	300	NA	0	0	0	0	0	0	0	0	0	NA	NA	0	0	NA	13.15	7.27	NA	3.468	5.651	NA
81805	2	21	2	3	3	1	160.728	68.2	26.4	106.5	0.947477	206	66	78	185	3.1	8.9	220	6.1	0	NA	NA	2	1	2	2	0	240	NA	0	0	0	0	0	0	0	0	0	NA	NA	0	0	NA	4.54	5.19	NA	1.547	3.146	NA
88540	2	22	3	2	2	1	170.449	76.7	26.4	101.6	0.877728	NA	49	NA	133	2	4.2	203	6.9	1	NA	NA	2	1	2	2	0	300	NA	2	2	2	1	1	2	0	1	1	2	NA	0	0	NA	3.49	5.6	NA	1.649	2.014	NA
119590	2	44	1	1	3	1	145.384	55.8	26.4	89.5	0.837201	92	66	115	199	2.7	3.4	203	7.1	1	NA	NA	2	1	4	2	0	30	NA	0	0	0	0	0	0	0	0	0	NA	NA	0	0	NA	6.84	6.16	NA	3.323	3.891	NA
118939	2	42	1	5	1	1	152.628	61.5	26.4	91	0.830783	NA	46	NA	180	1.9	5.1	276	7.2	1	NA	NA	2	1	2	2	0	360	NA	0	0	0	0	0	0	0	0	0	NA	NA	NA	NA	NA	NA	NA	NA	NA	NA	NA
90426	2	35	1	3	1	1	148.477	58.2	26.4	88.6	0.820102	214	47	105	195	2.5	4.2	305	7	1	NA	NA	2	1	4	2	0	30	NA	0	0	0	0	0	0	0	0	0	NA	NA	0	0	NA	3.91	1.12	NA	2.061	0.378	NA
123433	2	31	3	4	1	1	163.415	70.5	26.4	92.3	0.814366	NA	52	NA	226	2.4	4.6	48	7	1	NA	NA	2	1	2	2	0	720	NA	1	1	1	1	0	0	0	0	0	1	NA	43.3	18.6	NA	1.95	6.53	NA	0.53	2.046	NA
80458	2	24	1	2	1	1	151.882	60.9	26.4	88.4	0.809027	137	57	201	285	2.8	6	446	7.1	3	NA	NA	2	1	2	2	0	300	NA	0	1	1	1	1	1	1	0	0	1	NA	0	0	NA	14.84	3.16	NA	3.232	0.99	NA
74047	2	40	1	2	1	1	157.032	65.1	26.4	89.7	0.807351	124	29	132	186	1.8	3	189	6.8	1	NA	NA	2	1	5	1	0	240	NA	1	0	1	1	0	0	0	0	0	1	NA	0	0	NA	2.47	3.51	NA	1.314	2.521	NA
87258	2	30	2	4	2	1	161.55	68.9	26.4	90.1	0.79953	NA	83	NA	187	2.6	3.3	237	6.7	1	NA	NA	2	1	3	1	0	360	NA	0	0	1	0	0	0	1	1	0	0	NA	18.6	NA	NA	4.78	NA	NA	1.064	NA	NA
80589	2	28	5	5	1	1	161.55	68.9	26.4	89.5	0.794206	82	82	161	259	2.1	3.2	368	7.2	1	NA	NA	2	1	2	2	0	300	NA	0	0	1	1	0	0	0	0	0	0	NA	0	0	NA	0.77	1.84	NA	1.943	1.853	NA
113030	2	44	5	3	1	1	148.732	58.4	26.4	84.5	0.781481	NA	35	NA	182	2	5.5	200	7.6	3	NA	NA	2	1	3	2	0	360	NA	0	0	0	0	0	0	0	0	0	NA	NA	0	NA	NA	0.19	NA	NA	0.886	NA	NA
110890	2	41	4	2	1	1	164.57	71.5	26.4	88.5	0.778094	155	37	100	168	1.5	3.4	293	6.9	1	NA	NA	2	1	11	2	0	180	NA	0	1	0	1	1	1	0	0	1	0	NA	0	0	NA	0.74	1.46	NA	0.285	0.53	NA
73714	2	29	3	5	1	2	165.03	71.9	26.4	87.1	0.764717	62	71	130	213	2.9	4.1	307	7	0	NA	NA	2	1	1	2	0	240	NA	0	0	0	1	0	0	0	0	0	0	NA	0	0	NA	4.99	4.6	NA	2.159	1.417	NA
93169	2	27	2	5	1	2	162.951	70.1	26.4	85.6	0.756326	NA	75	NA	150	1.7	5.4	264	8	1	NA	NA	2	1	2	2	0	600	NA	0	1	1	3	1	1	0	0	0	0	NA	0	0	NA	4.82	5.57	NA	1.571	1.337	NA
123688	2	24	3	3	3	2	161.785	69.1	26.4	83.6	0.741313	NA	67	NA	126	1.7	7.4	265	6.6	1	NA	NA	2	1	1	2	0	420	NA	0	0	1	1	0	0	0	0	0	0	NA	NA	NA	NA	NA	NA	NA	NA	NA	NA
109333	2	41	2	4	1	2	153.864	62.5	26.4	80.6	0.732875	NA	63	NA	138	3.5	4	304	6.8	1	NA	NA	2	1	2	2	0	360	NA	0	0	0	0	0	0	0	0	0	NA	NA	0	0	NA	2.02	1.5	NA	1.812	2.665	NA
74530	2	45	1	3	1	1	159.252	66.7	26.3	95.2	0.853016	100	33	142	195	2.6	4.3	289	7	3	NA	NA	2	1	3	2	0	180	NA	1	0	0	1	0	1	0	0	0	0	NA	0	0	NA	3.57	2.21	NA	0.743	1.237	NA
75134	2	33	3	4	1	1	169.432	75.5	26.3	97.7	0.848711	32	60	85	151	3	3.6	356	7.1	1	NA	NA	2	1	1	2	0	420	NA	1	1	3	3	1	1	3	3	0	3	NA	0	0	NA	2.18	5.07	NA	0.839	1.279	NA
83700	2	29	3	5	1	1	161.74	68.8	26.3	92.5	0.822425	NA	106	NA	245	2.8	11.9	213	6.6	1	NA	NA	2	1	2	2	0	480	NA	0	0	1	1	0	0	0	0	0	0	NA	0	0	NA	4.38	5.25	NA	2.016	1.645	NA
88601	2	24	1	3	2	1	159.729	67.1	26.3	91.8	0.821323	NA	38	NA	147	2.4	4.1	256	7.3	1	NA	NA	2	1	5	2	0	480	NA	1	1	0	1	0	1	0	0	0	0	NA	0	0	NA	14.66	5.99	NA	2.187	1.439	NA
123094	2	29	3	4	1	1	160.678	67.9	26.3	91.7	0.818001	NA	90	NA	416	1.9	6.7	199	6.1	1	NA	NA	2	1	1	2	0	180	NA	0	0	0	0	0	0	0	0	0	NA	NA	0	0	NA	0.45	0.88	NA	1.054	1.3	NA
120842	2	30	3	4	3	1	163.261	70.1	26.3	92	0.814161	NA	56	NA	152	3.6	4.6	412	7.5	1	NA	NA	2	1	1	2	0	180	NA	0	0	0	0	0	0	0	0	0	NA	NA	0	0	NA	2.69	2.11	NA	1.038	0.652	NA
92216	2	31	2	3	3	1	159.491	66.9	26.3	89.9	0.804924	55	63	60	134	2.3	4.1	250	7.3	1	NA	NA	2	1	2	2	0	300	NA	0	0	0	1	0	0	0	0	0	0	NA	0	0	NA	3.88	0.61	NA	1.017	0.391	NA
111171	2	35	3	4	1	3	161.033	68.2	26.3	90	0.801952	NA	129	NA	259	1.7	4.6	244	7.5	1	NA	NA	2	1	4	2	0	240	NA	1	1	3	1	1	1	1	1	0	2	NA	0	NA	NA	1.36	NA	NA	2.646	NA	NA
119810	2	20	3	3	1	1	160.678	67.9	26.3	89.3	0.796592	67	49	46	108	2.3	3.5	221	6.4	1	NA	NA	2	1	2	2	0	300	NA	0	0	0	0	0	0	0	0	0	NA	NA	0	0	NA	7.6	3.78	NA	3.12	1.371	NA
109447	2	25	3	4	1	1	160.678	67.9	26.3	88.8	0.792132	76	48	80	143	2.4	4.7	166	6.7	1	NA	NA	2	1	4	2	0	120	NA	0	0	0	2	0	0	0	0	0	0	NA	0	0	NA	6.27	7.24	NA	2.484	1.764	NA
110739	2	40	3	4	2	1	161.269	68.4	26.3	88.9	0.79157	56	69	70	150	2.3	3.7	273	6.8	0	NA	NA	2	1	6	2	0	360	NA	1	2	1	1	1	1	1	2	0	2	NA	0	0	NA	0.73	4.86	NA	1.015	1.578	NA
81750	2	22	1	4	3	1	159.252	66.7	26.3	86.2	0.772374	164	53	74	160	2.3	4	310	6.8	1	NA	NA	2	1	4	2	0	120	NA	1	0	0	1	0	0	1	0	0	0	NA	0	14	NA	2.79	7.35	NA	1.046	3.389	NA
119109	2	33	5	5	1	1	165.573	72.1	26.3	87.6	0.76979	41	50	106	164	2.2	3.6	344	7.3	3	NA	NA	3	1	3	2	0	300	NA	0	0	1	1	0	0	1	0	0	0	NA	0	0	NA	0.52	3.14	NA	0.998	1.391	NA
122294	2	30	3	4	3	3	159.133	66.6	26.3	85.6	0.767285	NA	62	NA	198	1.6	3.4	207	7	1	NA	NA	2	1	5	2	0	300	NA	0	2	1	1	1	1	1	1	0	2	NA	0	15.5	NA	10.08	11	NA	3.071	2.946	NA
78718	2	45	1	1	1	1	167.287	73.6	26.3	85.4	0.746604	38	55	84	147	2.4	4.7	251	7.2	1	NA	NA	2	1	2	2	0	180	NA	0	0	0	0	0	0	0	0	0	NA	NA	0	0	NA	4.93	3.04	NA	2.246	2.491	NA
73813	2	34	3	3	1	1	157.692	65.4	26.3	80.5	0.724858	55	44	148	203	2.4	5.5	321	7.5	3	NA	NA	2	1	4	2	0	420	NA	1	0	1	1	1	0	0	0	0	0	NA	0	0	NA	0	0.05	NA	0.294	1.217	NA
76914	2	34	1	4	2	3	146.181	56.2	26.3	77.4	0.723867	NA	NA	NA	NA	NA	NA	NA	NA	1	NA	NA	2	1	2	1	0	480	NA	0	0	1	1	0	1	2	0	0	1	NA	0	0	NA	3.61	3.85	NA	1.374	0.961	NA
119725	2	20	1	3	1	1	164.038	70.5	26.2	107.4	0.950601	238	66	135	249	1.4	8.1	267	6	0	NA	NA	2	1	1	2	0	300	NA	0	0	2	2	0	0	0	0	0	0	NA	0	0	NA	5.15	4.38	NA	1.827	2.039	NA
109657	2	33	3	4	1	2	163.688	70.2	26.2	99.3	0.879845	NA	42	NA	177	3.9	4.1	287	6.9	1	NA	NA	2	1	1	2	0	480	NA	0	0	0	1	0	0	0	0	0	0	NA	0	0	NA	4.01	4.77	NA	2.149	1.247	NA
85384	2	32	5	5	2	3	169.98	75.7	26.2	99.1	0.86167	NA	128	NA	246	2.1	6.1	224	6.3	1	NA	NA	2	1	4	2	1	540	NA	1	1	1	1	0	1	0	0	0	1	NA	0	0	NA	14.77	3.68	NA	3.228	1.166	NA
79883	2	35	1	2	1	1	168.287	74.2	26.2	94	0.821425	NA	65	NA	165	1.4	3.1	202	8	1	NA	NA	2	1	3	1	0	480	NA	0	0	0	0	0	0	0	0	0	NA	NA	0	0	NA	2.91	2.81	NA	1.773	2.397	NA
121500	2	30	3	2	2	1	159.914	67	26.2	91.6	0.821141	46	41	119	169	2.4	2.5	190	6.2	1	NA	NA	2	1	7	1	1	60	NA	1	3	3	1	3	1	0	0	1	0	NA	21.6	0	NA	2.89	1.85	NA	0.706	1.084	NA
121654	2	45	4	1	1	1	168.514	74.4	26.2	93.8	0.819126	NA	84	NA	232	2.8	3.6	291	6.4	1	NA	NA	2	1	4	2	0	300	NA	1	1	3	3	3	2	3	0	0	0	NA	0	0	NA	0	1.06	NA	0.034	1.371	NA
88632	2	42	4	5	3	1	165.313	71.6	26.2	92.9	0.819084	NA	61	NA	191	3.2	3.9	207	6.9	1	NA	NA	2	1	4	2	0	300	NA	0	0	0	2	0	0	0	0	0	0	NA	0	0	NA	3.64	4.52	NA	1.765	2.926	NA
90980	2	38	4	3	3	1	169.755	75.5	26.2	94	0.817866	NA	50	NA	259	3.1	5.4	199	7.1	1	NA	NA	2	1	5	2	0	240	NA	3	0	0	3	3	0	0	0	0	1	NA	0	0	NA	2.77	2.56	NA	1.366	2.679	NA
92773	2	26	2	3	1	1	161.576	68.4	26.2	91	0.811556	36	88	79	174	2.9	4.9	179	7.5	1	NA	NA	2	1	1	2	0	480	NA	0	0	0	0	1	0	1	0	0	0	NA	0	0.1	NA	2.41	5.05	NA	1.499	2.05	NA
119421	2	38	5	2	1	2	162.048	68.8	26.2	91.1	0.811264	NA	71	NA	164	1.8	2	226	6.7	1	NA	NA	2	1	4	2	1	480	NA	3	0	2	1	2	0	0	0	0	1	NA	76.3	NA	NA	0.14	NA	NA	1.22	NA	NA
83065	2	44	4	3	1	1	158.476	65.8	26.2	88.8	0.799646	NA	55	NA	168	2.1	4.5	260	7.1	1	NA	NA	2	1	1	2	0	480	NA	1	0	0	2	0	0	0	0	0	0	NA	NA	NA	NA	NA	NA	NA	NA	NA	NA
79886	2	43	3	4	1	1	159.436	66.6	26.2	88.3	0.792745	122	51	93	168	1.5	2	201	6.3	1	NA	NA	2	1	2	2	0	120	NA	1	1	2	1	0	1	0	0	0	1	NA	NA	NA	NA	NA	NA	NA	NA	NA	NA
78094	2	39	5	5	1	1	169.867	75.6	26.2	91	0.791502	NA	90	NA	173	1.8	4.6	259	7	1	NA	NA	2	1	2	2	1	120	NA	0	0	0	1	0	0	0	0	0	0	NA	0	0	NA	8.73	0.99	NA	1.893	3.601	NA
81238	2	21	3	2	1	1	156.293	64	26.2	84.4	0.765312	43	51	125	185	2.3	3.7	295	7.5	1	NA	NA	2	1	2	1	0	300	NA	0	0	0	0	2	0	1	0	0	0	NA	0	18.6	NA	10.01	0.25	NA	2.351	0.751	NA
79396	2	32	3	5	1	1	176.371	81.5	26.2	88	0.751163	33	60	55	122	2.5	2.6	224	6.7	1	NA	NA	2	1	3	2	0	360	NA	0	0	0	1	0	0	0	0	0	0	NA	0	0	NA	5.61	3.24	NA	2.627	1.8	NA
110391	2	33	1	2	1	1	156.415	64.1	26.2	82.7	0.749604	45	60	99	168	2.5	2.8	269	6.5	1	NA	NA	2	1	3	1	0	240	NA	0	0	0	0	0	0	0	0	0	NA	NA	0	0	NA	7.57	5.66	NA	2.194	1.609	NA
83665	2	31	5	5	1	1	165.774	72	26.2	85.1	0.749269	NA	40	NA	207	2.9	3.8	255	7.5	0	NA	NA	2	1	1	2	0	600	NA	0	0	0	0	0	0	0	0	0	NA	NA	0	0	NA	4.11	2.88	NA	2.12	1.227	NA
109938	2	34	2	5	3	1	162.401	69.1	26.2	83.3	0.740997	NA	66	NA	177	2	4.5	327	7.2	1	NA	NA	2	1	3	2	0	600	NA	0	0	0	2	0	0	0	0	0	0	NA	NA	NA	NA	NA	NA	NA	NA	NA	NA
76736	2	30	5	5	1	2	145.165	55	26.1	97.2	0.916872	178	40	111	187	2.2	8.8	216	6.5	3	NA	NA	2	1	1	2	0	720	NA	0	0	0	3	0	0	0	0	0	0	NA	0	0	NA	2.31	1.65	NA	1.328	1.43	NA
85415	2	41	4	2	3	3	153.003	61.1	26.1	93.3	0.857244	NA	31	NA	177	2	4.8	307	7.6	3	NA	NA	2	1	2	2	0	348	NA	0	0	0	0	0	0	0	0	0	NA	NA	0	0	NA	5.27	2.37	NA	1.618	1.657	NA
115982	2	30	5	5	1	3	157.081	64.4	26.1	93.5	0.847858	32	42	86	134	2	6	260	6.5	1	NA	NA	2	1	1	2	1	120	NA	1	0	1	1	0	0	1	0	0	0	NA	0	0	NA	6.6	7.15	NA	3.604	3.03	NA
89340	2	24	1	5	1	1	155.117	62.8	26.1	90.5	0.825832	38	54	62	124	2	2.2	214	6.5	1	NA	NA	2	1	1	2	0	480	NA	0	0	0	0	0	0	0	0	0	NA	NA	NA	NA	NA	NA	NA	NA	NA	NA	NA
75662	2	44	2	5	1	2	165.513	71.5	26.1	93.2	0.823327	58	79	91	182	1.5	4.5	341	7.4	1	NA	NA	2	1	3	2	0	300	NA	0	0	0	1	0	0	0	0	0	0	NA	0	0	NA	1.2	3.38	NA	3.088	2.187	NA
114803	2	35	5	4	1	1	153.628	61.6	26.1	89.3	0.818822	NA	41	NA	234	1.6	5.4	260	8.1	0	NA	NA	2	1	1	2	0	60	NA	0	0	0	0	0	0	0	0	0	NA	NA	0	0	NA	7.45	0.58	NA	2.057	0.247	NA
116833	2	30	1	4	3	1	173.867	78.9	26.1	93.1	0.802442	65	39	65	117	1.6	3.5	203	7.1	1	NA	NA	2	1	1	2	0	180	NA	0	1	1	1	0	1	1	0	0	1	NA	12.4	0	NA	1.58	1.19	NA	2.531	0.847	NA
121022	2	39	3	4	2	3	165.745	71.7	26.1	90.6	0.7998	NA	68	NA	217	2.8	6.3	367	6.6	1	NA	NA	2	1	1	2	0	360	NA	2	2	1	1	1	1	2	0	0	0	NA	0	0	NA	3.06	2.67	NA	2.202	2.921	NA
114709	2	34	1	2	1	1	150.351	59	26.1	86	0.797111	56	66	141	218	2.3	3.4	215	NA	1	NA	NA	2	1	5	2	0	120	NA	0	0	0	1	0	1	1	0	0	0	NA	23.4	0	NA	5.25	3.64	NA	2.312	2.168	NA
76577	2	23	5	3	1	1	160.101	66.9	26.1	87.7	0.787728	NA	46	NA	187	2.8	3.7	363	6.4	3	NA	NA	2	1	1	2	0	180	NA	0	0	3	3	0	0	0	0	0	0	NA	0	0	NA	10.3	0.44	NA	4.034	0.807	NA
109478	2	27	3	4	1	2	170.754	76.1	26.1	90.4	0.78624	65	74	105	192	2.2	3	291	6.8	1	NA	NA	2	1	2	2	0	180	NA	0	0	0	0	0	0	0	0	0	NA	NA	17.6	NA	NA	5.5	NA	NA	1.005	NA	NA
111744	2	41	4	5	3	1	162.712	69.1	26.1	86.4	0.769799	49	54	108	172	2.2	2	145	6.5	3	NA	NA	2	1	1	2	0	600	NA	0	0	0	0	0	0	0	0	0	NA	NA	0	0	NA	7.34	1.19	NA	2.811	1.437	NA
77438	2	41	1	4	3	2	150.733	59.3	26.1	82.7	0.765552	73	54	96	165	1.3	4.3	235	6.6	0	NA	NA	2	1	4	2	0	780	NA	2	2	2	2	2	0	2	0	0	1	NA	0	0	NA	0.27	0.07	NA	0.558	0.848	NA
114690	2	41	4	3	2	1	164.934	71	26.1	86.3	0.763712	42	63	89	160	1.9	3.4	297	7.6	1	NA	NA	2	1	3	2	0	120	NA	2	2	2	2	0	2	2	0	2	1	NA	0	0	NA	2.6	11.26	NA	4.341	2.845	NA
122638	2	45	3	2	3	1	170.418	75.8	26.1	87.6	0.762641	NA	NA	NA	NA	NA	NA	NA	NA	1	NA	NA	2	1	11	2	0	420	NA	1	1	1	1	0	0	0	0	0	1	NA	0	0	NA	2.63	3.57	NA	1.148	1.824	NA
116003	2	25	2	3	3	3	161.767	68.3	26.1	84.4	0.754172	NA	58	NA	125	2.3	8.1	271	7	1	NA	NA	2	1	3	2	0	300	NA	1	1	2	3	2	2	0	1	0	1	NA	28.6	0	NA	5.86	1.87	NA	1.818	0.807	NA
121194	2	39	4	4	1	1	151.24	59.7	26.1	80.3	0.742087	NA	100	NA	266	1.3	3.7	406	6.7	1	NA	NA	2	1	4	2	0	480	NA	0	0	0	0	0	0	0	0	0	NA	NA	0	0	NA	1.72	2.27	NA	0.793	1.35	NA
118488	2	35	5	3	1	1	149.2	58.1	26.1	76	0.707136	34	83	79	169	1.6	2.2	167	6.9	1	NA	NA	2	1	1	2	0	240	NA	0	0	0	0	0	0	0	0	0	NA	NA	0	0	NA	3.44	0.59	NA	2.355	1.399	NA
84650	2	30	4	5	1	2	160.168	66.7	26	94.2	0.8481	NA	41	NA	167	2.1	2.8	211	NA	0	NA	NA	2	1	3	2	0	600	NA	3	2	1	2	0	0	0	0	0	0	NA	0	0	NA	4.6	5.95	NA	1.163	1.484	NA
85823	2	28	1	2	1	1	156.77	63.9	26	92.5	0.841772	NA	76	NA	213	2.4	4.4	233	6.3	3	NA	NA	2	1	2	2	0	180	NA	0	0	0	1	0	0	0	0	0	0	NA	0	NA	NA	7.37	NA	NA	2.8	NA	NA
122631	2	45	3	5	1	2	166.063	71.7	26	94.5	0.835564	78	53	115	184	1.5	3	238	7.2	1	NA	NA	2	1	4	2	0	180	NA	1	1	1	1	1	1	0	0	0	1	NA	0	NA	NA	4.74	NA	NA	3.139	NA	NA
124052	2	37	2	4	3	1	163.26	69.3	26	91.6	0.816846	NA	52	NA	166	1.9	1.9	157	7	1	NA	NA	2	1	3	2	1	600	NA	1	0	3	3	1	0	0	0	0	0	NA	NA	NA	NA	NA	NA	NA	NA	NA	NA
77279	2	38	3	5	1	1	164.901	70.7	26	91.2	0.809222	86	60	94	171	2.1	2.6	202	6.7	1	NA	NA	2	1	5	3	0	360	NA	0	0	0	1	0	0	0	0	0	0	NA	0	0	NA	2.42	1.64	NA	1.498	1.361	NA
84532	2	23	1	2	1	1	154.297	61.9	26	85.1	0.780611	NA	60	NA	144	1.8	4.6	250	7.8	1	NA	NA	2	1	1	2	0	480	NA	2	0	2	0	0	0	0	0	0	0	NA	0	0	NA	16.61	1.03	NA	4.526	0.739	NA
118669	2	38	3	5	1	2	158.357	65.2	26	85.5	0.774162	NA	59	NA	182	2.4	4.5	311	7	1	NA	NA	2	1	1	2	1	480	NA	0	1	1	0	0	0	0	0	0	0	NA	0	0	NA	1.59	5.1	NA	1.947	2.063	NA
86858	2	20	4	4	3	1	162.078	68.3	26	84.7	0.758064	NA	49	NA	279	2.2	5	570	7.3	3	NA	NA	2	1	1	2	0	180	NA	0	0	0	0	0	0	0	0	0	NA	NA	0	0	NA	4.31	3.81	NA	2.082	2.277	NA
74455	2	38	3	4	3	1	157.992	64.9	26	79.7	0.722478	NA	51	NA	128	1.1	2.7	193	6.7	1	NA	NA	2	1	8	2	0	120	NA	0	0	1	1	0	0	2	0	0	0	NA	44.6	0	NA	3.06	8.94	NA	2.578	2.647	NA
87154	2	30	1	2	1	1	155.342	62.5	25.9	93.2	0.854222	259	42	183	277	2.5	3.2	245	7.2	3	NA	NA	2	1	4	2	0	300	NA	0	0	0	0	1	0	0	0	0	0	NA	0	0	NA	2.06	2.59	NA	1.595	1.359	NA
83947	2	33	3	4	1	1	168.459	73.5	25.9	96.6	0.850218	126	70	104	199	1.2	5.6	157	6.2	1	NA	NA	2	1	3	2	0	300	NA	1	1	0	0	0	0	0	0	0	0	NA	0	NA	NA	5.76	NA	NA	2.109	NA	NA
83356	2	21	3	4	1	1	155.218	62.4	25.9	88	0.806885	NA	30	NA	205	2.6	5.2	301	7.3	1	NA	NA	2	1	2	2	0	420	NA	1	1	2	2	2	2	1	0	0	1	NA	0	0	NA	0.71	10.38	NA	1.328	3.401	NA
114387	2	30	3	4	3	1	155.591	62.7	25.9	87.4	0.800423	58	42	86	140	1.5	3.4	223	6.9	1	NA	NA	2	1	5	2	0	360	NA	2	0	3	2	1	0	3	1	0	2	NA	0	0	NA	2.37	3.95	NA	0.846	1.297	NA
88507	2	32	2	1	1	1	154.969	62.2	25.9	87.2	0.800192	NA	45	NA	155	2.8	5.4	228	6.9	3	NA	NA	2	1	3	2	0	40	NA	0	0	0	0	0	0	0	0	0	NA	NA	0	0	NA	0.22	0.29	NA	0.719	0.43	NA
78457	2	33	3	5	1	1	165.452	70.9	25.9	88.2	0.783307	NA	52	NA	211	3.4	3.3	282	7.1	1	NA	NA	2	1	2	2	0	360	NA	0	0	0	0	0	0	0	0	0	NA	NA	0	0	NA	6.07	3.27	NA	1.915	0.716	NA
120908	2	22	1	3	1	1	156.827	63.7	25.9	85.3	0.778107	NA	42	NA	179	1.7	3.8	278	7.2	1	NA	NA	2	1	1	2	0	240	NA	0	0	0	0	0	0	0	0	0	NA	NA	0	0	NA	3.74	1.62	NA	1.95	1.072	NA
124106	2	40	4	3	1	3	161.795	67.8	25.9	86	0.772354	18	64	38	106	1.9	2.4	114	7.1	3	NA	NA	2	1	4	2	0	480	NA	2	2	0	0	0	0	0	0	0	0	NA	0	0	NA	5.84	5.74	NA	1.723	2.218	NA
86447	2	22	3	3	3	1	157.318	64.1	25.9	82.5	0.751388	67	57	75	145	2.2	3.2	140	7.5	1	NA	NA	2	1	1	2	0	300	NA	0	0	0	0	0	0	0	0	0	NA	NA	0	0	NA	17.92	6.48	NA	7.167	0.89	NA
117114	2	35	2	4	3	3	155.218	62.4	25.9	80.5	0.738116	141	62	122	212	4	7.2	426	7.8	1	NA	NA	2	1	1	2	0	120	NA	3	3	0	3	3	0	1	0	1	2	NA	0	0	NA	3.05	4.26	NA	1.139	1.171	NA
90964	2	31	3	5	1	2	169.942	74.8	25.9	84.1	0.736963	NA	74	NA	214	1.9	3	241	7.3	1	NA	NA	2	1	1	2	0	360	NA	2	0	0	3	0	0	1	0	0	1	NA	0	0	NA	4.42	5.57	NA	3.071	2.719	NA
90354	2	43	1	2	1	1	153.341	60.9	25.9	79.7	0.73524	NA	54	NA	211	2	3.5	270	6.8	1	NA	NA	2	1	3	2	0	180	NA	0	2	0	2	0	2	0	0	0	0	NA	0	0	NA	2.6	3.37	NA	0.934	1.785	NA
82257	2	25	3	2	1	1	168.459	73.5	25.9	83.2	0.732279	137	54	85	166	2.2	3.8	138	6.1	1	NA	NA	2	1	5	2	0	240	NA	0	0	1	1	1	0	0	0	0	0	NA	0	0	NA	9.04	7.59	NA	9.431	8.693	NA
114723	2	43	3	2	1	1	163.339	69.1	25.9	81.9	0.732048	NA	72	NA	197	1.4	4.8	247	6.9	1	NA	NA	2	1	6	1	0	240	NA	0	0	0	0	0	0	0	0	0	NA	NA	0	0	NA	1.55	1.46	NA	0.509	0.644	NA
112540	2	26	4	4	1	3	164.046	69.7	25.9	82	0.731359	NA	65	NA	199	1.5	5.3	389	7.4	1	NA	NA	2	1	3	2	0	480	NA	1	2	0	1	2	2	0	0	0	0	NA	27.3	12.4	NA	14.21	2.3	NA	4.003	2.375	NA
114030	2	28	4	4	3	1	169.145	74.1	25.9	78.1	0.685996	32	71	101	178	2.7	2.1	211	6.6	1	NA	NA	2	1	3	2	0	240	NA	2	3	3	3	3	2	2	1	0	2	NA	0	0	NA	12.28	3.04	NA	3.09	1.776	NA
117595	2	35	3	4	1	1	177.406	81.2	25.8	104.1	0.895132	199	78	178	296	1.6	6.5	186	6.2	1	NA	NA	2	1	4	2	0	180	NA	0	0	0	0	0	0	0	0	0	NA	NA	0	NA	NA	5.31	NA	NA	2.493	NA	NA
110062	2	40	4	4	1	1	166.938	71.9	25.8	95.5	0.846538	NA	50	NA	154	1.6	3.1	202	7.3	1	NA	NA	2	1	3	2	0	360	NA	0	0	0	0	0	0	0	0	0	NA	NA	27.6	31.8	NA	1.23	3.49	NA	0.728	0.525	NA
80731	2	32	5	4	1	1	164.01	69.4	25.8	93.2	0.833491	NA	62	NA	149	2.4	2.9	264	6.9	1	NA	NA	1	1	25	2	0	360	NA	3	3	3	3	1	1	1	1	1	3	NA	NA	NA	NA	NA	NA	NA	NA	NA	NA
75958	2	29	5	4	1	2	157.5	64	25.8	90.5	0.825902	63	48	117	178	3.8	4.5	315	7.6	3	NA	NA	2	1	1	1	0	240	NA	0	0	0	0	0	0	0	0	0	NA	NA	0	0	NA	4.05	3.81	NA	1.678	2.249	NA
117840	2	35	1	2	1	3	155.519	62.4	25.8	89	0.817371	NA	69	NA	172	2.5	3.9	271	7	1	NA	NA	2	1	4	2	0	300	NA	1	0	0	1	0	0	1	0	0	0	NA	7.7	0	NA	6.02	4.65	NA	1.981	1.708	NA
116451	2	36	1	1	1	3	161.749	67.5	25.8	90.5	0.814982	103	64	104	189	2.1	4.3	162	6.3	0	NA	NA	1	1	6	1	0	300	NA	0	0	3	3	0	1	0	0	0	0	NA	0	0	NA	4.91	3.46	NA	3.54	2.288	NA
120676	2	45	3	5	1	1	156.14	62.9	25.8	86.2	0.790078	51	73	145	228	2.1	4.3	250	6.8	1	NA	NA	2	1	2	2	0	300	NA	0	0	0	0	0	0	0	0	0	NA	NA	0	44.5	NA	4.87	3.53	NA	1.438	1.364	NA
109919	2	45	1	1	1	3	148.898	57.2	25.8	83.7	0.7856	75	57	148	220	1.7	4	285	6.8	1	NA	NA	2	1	1	2	0	120	NA	0	1	0	0	0	0	0	0	0	0	NA	0	NA	NA	1.5	NA	NA	1.771	NA	NA
113409	2	30	3	3	3	1	159.456	65.6	25.8	86	0.780005	NA	30	NA	160	2.9	6.3	280	7	1	NA	NA	2	1	3	2	0	120	NA	0	0	0	0	0	0	0	0	0	NA	NA	0	0	NA	4.63	3.7	NA	0.761	1.045	NA
81847	2	38	3	4	3	1	164.565	69.6	25.7	97.5	0.872731	282	40	68	164	1.8	4.5	191	7.1	1	NA	NA	1	1	5	1	0	360	NA	1	1	2	3	2	1	0	0	0	1	NA	0	NA	NA	1.24	NA	NA	0.783	NA	NA
80251	2	27	4	3	1	1	166.329	71.1	25.7	94.1	0.837819	68	64	69	147	2.1	1.7	368	7.1	3	NA	NA	2	1	4	2	0	240	NA	1	1	3	1	0	0	3	2	0	1	NA	0	0	NA	0.22	5.17	NA	0.676	1.819	NA
83393	2	23	3	4	1	1	170.26	74.5	25.7	95.2	0.837772	93	60	73	152	1.7	8.7	157	6.6	1	NA	NA	2	1	1	2	0	300	NA	0	0	0	1	0	0	0	0	0	0	NA	0	0	NA	11.82	4.27	NA	4.204	2.132	NA
82337	2	35	3	5	3	1	168.421	72.9	25.7	93.7	0.829059	69	55	52	121	2.4	2.9	218	6.8	1	NA	NA	2	1	5	2	0	120	NA	0	0	0	0	0	0	0	0	0	NA	NA	0	0	NA	3.07	1.94	NA	2.195	1.156	NA
75155	2	34	3	4	1	2	160.617	66.3	25.7	89.6	0.811816	421	38	NA	203	3.7	3.1	308	7.2	1	NA	NA	2	1	1	2	0	960	NA	0	1	0	1	0	0	0	0	0	0	NA	111.6	59.5	NA	7.78	1.89	NA	3.086	2.637	NA
90919	2	28	1	1	1	1	152.54	59.8	25.7	86.9	0.807927	NA	78	NA	171	1.8	4.8	234	7.5	1	NA	NA	2	1	9	2	0	480	NA	0	0	0	0	0	0	0	0	0	NA	NA	0	0	NA	5.25	4.85	NA	3.687	1.034	NA
124363	2	36	1	4	2	1	160.738	66.4	25.7	88.8	0.804264	NA	51	NA	136	4.1	3.7	263	7.4	1	NA	NA	2	1	3	2	1	120	NA	0	3	2	2	2	3	0	1	1	2	NA	0	NA	NA	2.92	NA	NA	3.572	NA	NA
117054	2	38	1	4	1	1	166.329	71.1	25.7	90.2	0.803095	NA	72	NA	150	0.9	10.1	233	7.6	1	NA	NA	2	1	3	2	0	240	NA	0	0	0	0	0	0	0	0	0	NA	NA	76.2	0	NA	11.62	8.71	NA	0.919	1.224	NA
124676	2	45	1	3	1	2	161.703	67.2	25.7	86.7	0.782897	NA	50	NA	190	3	3.5	361	6.9	0	NA	NA	3	1	2	2	0	240	NA	0	0	0	1	0	0	0	0	0	0	NA	0	0	NA	3.09	4.7	NA	2.473	1.982	NA
90603	2	32	4	3	1	1	159.645	65.5	25.7	84.2	0.765208	NA	NA	NA	NA	NA	NA	NA	NA	1	NA	NA	2	1	5	2	0	240	NA	0	0	0	0	0	0	0	0	0	NA	NA	0	0	NA	7.37	0.32	NA	1.224	0.901	NA
112319	2	33	3	3	1	1	172.527	76.2	25.6	97.7	0.856326	133	53	146	226	2	1.9	233	7	1	NA	NA	2	1	2	2	0	180	NA	0	1	0	0	0	0	0	0	0	0	NA	55.6	0	NA	4.58	2.27	NA	1.784	2.207	NA
118232	2	25	2	3	1	1	153.73	60.5	25.6	90.5	0.840317	91	68	93	179	1.4	3.6	304	7.1	1	NA	NA	2	1	2	2	0	120	NA	1	2	0	1	0	0	1	0	0	0	NA	0	NA	NA	7.18	NA	NA	1.477	NA	NA
78755	2	40	3	3	1	1	162.98	68	25.6	93	0.838666	NA	49	NA	180	2.6	5.3	300	6.8	1	NA	NA	2	1	2	2	0	600	NA	0	0	0	0	0	0	0	0	0	NA	NA	0	0	NA	1.4	5.18	NA	2.817	1.191	NA
111869	2	44	5	5	1	1	150.39	57.9	25.6	88.6	0.831759	60	55	166	233	2.1	2.5	157	7.2	1	NA	NA	2	1	3	2	0	300	NA	0	0	2	1	0	0	0	0	0	0	NA	0	0	NA	2.48	4.23	NA	1.543	1.286	NA
109884	2	45	1	3	1	2	165.713	70.3	25.6	92.7	0.829038	NA	54	NA	201	2.2	2.7	272	7.9	1	NA	NA	2	1	3	1	0	180	NA	0	0	0	0	0	0	0	0	0	NA	NA	0	NA	NA	6.42	NA	NA	2.802	NA	NA
80025	2	25	3	5	1	1	165.949	70.5	25.6	92	0.822193	NA	34	NA	171	1.9	4	217	7.6	1	NA	NA	2	1	1	2	0	240	NA	0	0	0	0	1	0	0	0	0	0	NA	0	0	NA	12.94	6.31	NA	4.268	3.121	NA
77837	2	27	5	5	1	1	149.086	56.9	25.6	86.7	0.817475	81	73	64	153	2.2	8	222	7.4	1	NA	NA	2	1	1	2	0	480	NA	1	1	0	1	1	1	0	0	0	0	NA	0	0	NA	3.72	3.53	NA	2.501	1.192	NA
86189	2	28	3	3	1	1	163.1	68.1	25.6	90.2	0.813117	NA	66	NA	160	3.1	6.7	263	7.1	1	NA	NA	2	1	2	2	0	300	NA	0	0	0	1	0	0	0	0	0	0	NA	0	0	NA	2	3.67	NA	0.918	1.497	NA
75027	2	42	3	3	1	1	164.412	69.2	25.6	89.4	0.802684	NA	37	NA	167	2.9	6.9	380	7.3	3	NA	NA	2	1	3	2	1	300	NA	0	0	0	0	0	0	0	0	0	NA	NA	0	0	NA	3.55	7.85	NA	1.018	2.066	NA
90262	2	30	2	4	1	1	152.71	59.7	25.6	86	0.801195	NA	89	NA	216	3.9	3.6	251	7.7	1	NA	NA	2	1	4	2	0	540	NA	1	1	0	2	1	1	0	0	0	1	NA	70.4	NA	NA	7.56	NA	NA	2.621	NA	NA
91527	2	41	3	4	2	1	163.578	68.5	25.6	88.4	0.795725	62	49	94	155	1.6	3.2	209	7	1	NA	NA	2	1	3	2	0	360	NA	1	1	3	2	3	1	1	1	0	1	NA	15.9	NA	NA	0.46	NA	NA	0.724	NA	NA
85209	2	43	3	4	3	1	166.184	70.7	25.6	88.5	0.790354	119	64	114	202	1.7	3.1	230	6.8	1	NA	NA	2	1	2	2	0	720	NA	0	0	3	0	0	0	0	3	0	0	NA	23.8	0	NA	1.35	5.07	NA	0.539	1.854	NA
83701	2	45	4	4	1	1	165.005	69.7	25.6	87.7	0.786004	NA	50	NA	194	2.6	4	217	7.1	3	NA	NA	2	1	2	2	0	600	NA	0	0	0	0	0	0	0	0	0	NA	NA	0	0	NA	3.45	2.22	NA	1.762	1.416	NA
74172	2	33	3	5	3	1	169.212	73.3	25.6	87.9	0.77794	NA	66	NA	137	2.1	6.6	326	7.3	1	NA	NA	2	1	2	2	0	540	NA	0	0	0	0	0	0	0	0	0	NA	NA	0	0	NA	6.59	2.22	NA	1.869	2.445	NA
123413	2	37	5	1	3	1	155.624	62	25.6	83.5	0.770587	NA	40	NA	136	2.8	5.1	120	6.9	3	NA	NA	2	1	4	2	0	180	NA	0	0	0	0	0	0	0	0	0	NA	NA	0	NA	NA	4.51	NA	NA	1.832	NA	NA
82996	2	37	1	2	1	1	156.125	62.4	25.6	83.6	0.770271	NA	52	NA	214	2.7	4.3	299	7.1	1	NA	NA	2	1	3	1	0	240	NA	0	0	0	1	0	0	0	0	0	0	NA	0	0	NA	8.01	1.92	NA	3.136	1.771	NA
78901	2	44	4	5	1	1	168.054	72.3	25.6	86.4	0.767295	NA	42	NA	136	1.6	4	112	6.3	3	NA	NA	2	1	5	2	1	300	NA	0	0	1	0	0	0	0	0	0	0	NA	0	0	NA	2.57	1.79	NA	1.833	1.646	NA
119935	2	38	1	1	1	1	155.373	61.8	25.6	81.7	0.754585	NA	59	NA	189	1.6	5.4	208	7.5	0	NA	NA	2	1	2	2	0	180	NA	1	1	1	1	1	0	0	1	0	1	NA	0	0	NA	6.25	1.72	NA	1.746	1.203	NA
91404	2	34	5	5	1	1	160.444	65.9	25.6	80.3	0.72984	88	51	142	211	1.6	3.2	223	7.8	1	NA	NA	2	1	3	2	0	360	NA	0	0	0	0	0	0	0	0	0	NA	NA	0	0	NA	2.74	0.86	NA	1.141	0.765	NA
116873	2	33	4	4	3	1	153.475	60.3	25.6	74.3	0.690467	63	67	87	167	1.9	2	260	7	1	NA	NA	2	1	2	2	0	120	NA	0	0	1	0	0	0	0	0	0	0	NA	0	0	NA	4.75	6.01	NA	3.738	1.683	NA
117303	2	37	2	3	3	1	155.172	61.4	25.5	94.2	0.872872	NA	NA	NA	NA	NA	NA	NA	NA	0	NA	NA	2	1	5	2	0	240	NA	1	2	1	3	1	0	0	0	0	0	NA	0	NA	NA	0.59	NA	NA	1.348	NA	NA
117195	2	26	1	3	1	3	143.349	52.4	25.5	89.4	0.861879	NA	48	NA	113	1.9	4.6	266	6.7	1	NA	NA	2	1	4	2	0	180	NA	0	0	0	0	0	0	0	0	0	NA	NA	NA	NA	NA	NA	NA	NA	NA	NA	NA
83372	2	25	2	4	1	1	157.306	63.1	25.5	91.1	0.838403	39	43	78	129	1.3	3.6	259	7.5	1	NA	NA	2	1	2	2	0	240	NA	0	0	1	1	0	0	0	0	0	0	NA	0	0	NA	3.05	1.06	NA	1.834	1.941	NA
81946	2	30	2	2	1	3	158.547	64.1	25.5	88.5	0.811279	NA	51	NA	150	2.7	3.9	203	7.3	3	NA	NA	2	1	5	2	0	480	NA	0	0	0	0	0	0	0	0	0	NA	NA	0	0	NA	2.27	2.69	NA	1.407	1.396	NA
82357	2	26	4	3	1	1	175.79	78.8	25.5	91.6	0.797454	NA	55	NA	206	2	2.4	223	7.7	3	NA	NA	2	1	2	2	0	480	NA	0	0	0	0	0	0	0	0	0	NA	NA	0	0	NA	4.23	11.39	NA	1.151	2.057	NA
122152	2	42	3	3	1	1	164.853	69.3	25.5	86.3	0.775834	NA	79	NA	203	1.8	4.3	241	7	1	NA	NA	2	1	5	1	1	180	NA	0	0	0	0	0	0	0	0	0	NA	NA	33.5	NA	NA	1.39	NA	NA	0.719	NA	NA
117990	2	34	5	3	1	3	160.514	65.7	25.5	82.3	0.749808	109	51	121	194	1.7	2.2	234	6.7	3	NA	NA	2	1	6	2	0	180	NA	0	0	0	0	0	0	0	0	0	NA	NA	0	0	NA	1.34	1.1	NA	0.937	0.706	NA
117853	2	43	4	3	1	1	150.981	57.9	25.4	91.2	0.85897	NA	37	NA	142	4.5	3.6	319	8	0	NA	NA	1	1	5	2	0	360	NA	0	0	1	1	0	0	0	0	0	0	NA	0	0	NA	3.22	0.53	NA	1.737	0.412	NA
82106	2	33	1	1	1	1	161.44	66.2	25.4	94	0.856182	NA	53	NA	191	1.7	3.9	262	7	1	NA	NA	2	1	2	2	0	120	NA	0	0	0	0	0	0	0	0	0	NA	NA	0	NA	NA	1.35	NA	NA	1.864	NA	NA
121071	2	21	2	2	1	1	154.589	60.7	25.4	89.5	0.833064	NA	49	NA	160	1.3	5.6	339	7.7	1	NA	NA	2	1	1	2	0	60	NA	0	0	0	0	0	0	0	0	0	NA	NA	0	0	NA	2.7	2.49	NA	1.785	1.076	NA
84685	2	27	3	3	1	1	166.483	70.4	25.4	89.5	0.802754	36	64	92	163	1.8	4.6	237	7.3	1	NA	NA	1	1	2	1	0	840	NA	0	0	0	1	0	0	0	0	0	0	NA	42.1	14	NA	3.65	15.25	NA	1.913	5.633	NA
75966	2	37	3	4	3	2	163.259	67.7	25.4	86.6	0.784374	NA	84	NA	159	1.9	7.4	228	6.2	1	NA	NA	2	1	1	2	0	180	NA	0	0	0	0	0	0	0	0	0	NA	NA	22.3	38.2	NA	9.93	4.14	NA	2.769	1.737	NA
73878	2	45	4	2	3	1	167.661	71.4	25.4	87.6	0.782947	NA	56	NA	237	2.5	3.1	212	7.2	1	NA	NA	2	1	7	2	0	60	NA	2	2	0	0	3	1	2	0	0	1	NA	0	0	NA	10.36	6.75	NA	2.789	2.682	NA
81202	2	38	3	3	1	1	171.262	74.5	25.4	86.7	0.766713	NA	65	NA	154	1.9	5.9	237	6.7	1	NA	NA	2	1	4	2	0	420	NA	0	0	0	1	0	0	0	0	0	1	NA	14	0	NA	3.23	2.42	NA	2.468	0.802	NA
83258	2	33	4	4	3	3	164.819	69	25.4	84.2	0.759019	NA	94	NA	237	2.4	3.7	250	7.7	1	NA	NA	2	1	5	1	0	180	NA	0	0	0	1	0	0	0	0	0	0	NA	0	12.4	NA	1.6	2.83	NA	2.261	1.067	NA
75447	2	33	3	5	1	2	163.259	67.7	25.4	83.4	0.75539	89	50	70	138	1.7	5.8	180	6.9	1	NA	NA	2	1	1	2	1	120	NA	1	2	0	3	3	0	0	0	0	0	NA	45.3	0	NA	4.55	2.71	NA	2.83	1.577	NA
121631	2	28	4	3	1	1	156.235	62	25.4	81.2	0.751815	NA	58	NA	178	2.3	5.2	301	7.7	3	NA	NA	2	1	5	2	0	180	NA	0	0	0	0	0	0	0	0	0	NA	NA	0	0	NA	5.02	0.02	NA	2.202	0.383	NA
116110	2	39	3	5	1	2	168.247	71.9	25.4	80.3	0.71645	44	101	111	221	2	5.2	326	7.5	1	NA	NA	2	1	2	2	1	300	NA	0	0	0	0	0	0	0	0	0	NA	NA	0	NA	NA	0.98	NA	NA	0.552	NA	NA
87353	2	30	5	5	3	1	157.615	63.1	25.4	73.3	0.675693	NA	67	NA	146	1	1	152	6.6	1	NA	NA	2	1	2	2	0	360	NA	0	0	0	0	0	0	0	0	0	NA	NA	79.8	NA	NA	2.3	NA	NA	1.169	NA	NA
89026	2	36	5	5	1	2	167.757	71.2	25.3	100.7	0.902144	122	82	181	287	1.4	4.7	174	6.3	1	NA	NA	2	1	5	2	0	120	NA	0	0	0	1	0	0	0	0	0	0	NA	0	0	NA	2.7	0.8	NA	1.788	1.118	NA
74765	2	45	3	2	1	1	160.04	64.8	25.3	97.5	0.894288	NA	41	NA	250	4.1	6.3	344	7.6	0	NA	NA	2	1	4	2	0	480	NA	0	0	0	0	0	0	0	0	0	NA	NA	0	0	NA	0.87	0.45	NA	0.438	0.655	NA
91328	2	45	5	5	3	2	161.27	65.8	25.3	93.7	0.856149	NA	54	NA	192	2.1	4.6	307	7	1	NA	NA	2	1	2	2	0	600	NA	0	0	1	1	0	0	0	0	0	0	NA	0	0	NA	0.89	3.86	NA	0.727	1.746	NA
87219	2	42	4	3	1	1	153.87	59.9	25.3	90.9	0.850303	NA	33	NA	208	2	5.6	214	6.9	3	NA	NA	2	1	1	2	0	180	NA	0	1	0	0	0	0	0	0	0	1	NA	0	NA	NA	0.36	NA	NA	0.489	NA	NA
88843	2	28	1	1	1	1	153.226	59.4	25.3	90.4	0.8474	57	91	126	228	2	4.4	241	7.7	3	NA	NA	2	1	5	2	0	180	NA	0	0	0	0	0	0	0	0	0	NA	NA	0	0	NA	3.07	2.42	NA	1.375	1.074	NA
85104	2	29	1	2	1	1	156.922	62.3	25.3	91.1	0.843845	NA	45	NA	192	1.8	4	165	6.1	1	NA	NA	2	1	4	2	0	60	NA	2	0	2	3	1	0	2	0	0	1	NA	0	0	NA	2.57	0.46	NA	1.378	1.031	NA
84946	2	38	2	1	2	1	152.58	58.9	25.3	85.1	0.799406	72	47	93	154	3.2	5.1	355	7	0	NA	NA	2	1	4	2	0	60	NA	0	1	3	0	0	2	0	1	0	0	NA	0	NA	NA	1.68	NA	NA	1.017	NA	NA
83694	2	36	5	5	1	1	167.874	71.3	25.3	87.2	0.780927	346	37	65	171	2.4	4.3	233	6.9	1	NA	NA	2	1	4	1	0	180	NA	1	1	1	1	1	1	1	0	0	0	NA	0	0	NA	6.62	1.4	NA	1.956	0.555	NA
118756	2	29	3	5	1	1	167.521	71	25.3	86.9	0.779061	27	90	117	212	2.3	3.8	231	7.3	1	NA	NA	2	1	2	2	0	540	NA	0	0	1	1	0	0	0	0	0	0	NA	0	0	NA	7.3	5.67	NA	1.787	1.604	NA
113980	2	43	1	2	1	1	155.53	61.2	25.3	83.7	0.778761	160	60	91	183	2.1	7.6	439	7.6	1	NA	NA	1	1	5	1	0	180	NA	1	0	0	1	2	0	0	0	0	0	NA	0	0	NA	7.38	1.53	NA	2.115	1.632	NA
91163	2	28	1	4	3	1	158.675	63.7	25.3	82.4	0.75903	NA	64	NA	157	2.8	4.8	238	6.5	1	NA	NA	2	1	3	1	0	480	NA	0	0	1	1	0	0	0	0	0	0	NA	42.1	NA	NA	8.11	NA	NA	4.578	NA	NA
118711	2	34	5	5	1	2	160.04	64.8	25.3	82.1	0.753036	NA	51	NA	226	1.9	3.9	306	7.5	1	NA	NA	2	1	1	2	0	360	NA	0	0	1	1	0	0	0	0	0	0	NA	0	0	NA	6.05	2.33	NA	1.803	3.94	NA
113332	2	26	3	3	1	1	166.456	70.1	25.3	82.2	0.73928	NA	44	NA	128	2.5	6.2	369	7.6	1	NA	NA	2	1	3	2	1	720	NA	0	0	0	0	0	0	0	0	0	NA	NA	NA	NA	NA	NA	NA	NA	NA	NA	NA
76671	2	40	4	5	1	1	157.55	62.8	25.3	79.6	0.735851	74	60	137	212	1.8	3.7	279	7.1	1	NA	NA	2	1	5	1	0	900	NA	0	0	0	1	0	0	0	0	0	0	NA	0	0	NA	1.25	12.07	NA	1.324	2.933	NA
90670	2	34	3	4	1	1	155.403	61.1	25.3	78.8	0.73347	109	53	71	146	3.5	5.1	228	6.8	1	NA	NA	2	1	2	2	0	180	NA	0	0	0	0	0	0	1	0	0	0	NA	0	NA	NA	4.45	NA	NA	3.442	NA	NA
110784	2	32	4	4	1	1	160.779	65.4	25.3	78	0.713784	45	71	118	198	1.4	2.1	125	7.1	1	NA	NA	2	1	2	2	0	300	NA	0	0	0	0	0	0	0	0	0	NA	NA	0	0	NA	6.91	1.19	NA	2.054	0.724	NA
76451	2	34	3	4	1	1	161.835	66	25.2	94.8	0.866973	56	74	109	194	1.9	3.4	207	6.8	1	NA	NA	2	1	6	2	0	420	NA	0	0	0	1	3	0	0	0	0	0	NA	0	0	NA	6.13	7.6	NA	2.036	2.758	NA
85525	2	40	1	1	2	1	152.102	58.3	25.2	91	0.858435	293	48	132	239	3.7	4.3	383	7.6	1	NA	NA	2	1	7	2	0	180	NA	2	2	2	2	1	0	0	0	0	0	NA	0	NA	NA	3.05	NA	NA	2.112	NA	NA
110213	2	25	5	4	1	1	164.751	68.4	25.2	92.5	0.838418	120	53	173	250	2.9	6.9	349	7.5	1	NA	NA	2	1	5	2	1	480	NA	0	0	1	0	0	0	0	0	0	0	NA	98.3	140.4	NA	2.59	2.99	NA	2.352	2.778	NA
78678	2	44	3	4	1	1	153.142	59.1	25.2	88.6	0.832952	57	98	87	196	1.6	3.8	308	7.4	1	NA	NA	2	1	2	2	1	300	NA	0	0	0	0	0	0	1	0	0	0	NA	44.6	22.3	NA	2.7	1.08	NA	0.987	0.696	NA
114312	2	33	1	1	1	1	157.737	62.7	25.2	89.7	0.830919	31	49	61	116	2.1	3.8	187	7	1	NA	NA	2	1	5	2	0	120	NA	0	0	0	0	0	0	0	0	0	NA	NA	0	NA	NA	1.89	NA	NA	2.117	NA	NA
124406	2	36	4	3	1	3	160.728	65.1	25.2	87	0.798375	55	39	82	132	2.5	1.3	320	7.6	1	NA	NA	2	1	6	2	1	840	NA	1	0	0	1	0	0	0	0	0	1	NA	0	0	NA	3.98	0.32	NA	1.392	1.439	NA
74489	2	36	3	4	1	2	169.734	72.6	25.2	89.4	0.798337	NA	58	NA	163	1.7	3	216	7	1	NA	NA	2	1	1	2	1	780	NA	0	0	0	0	0	0	0	0	0	NA	NA	0	NA	NA	18.34	NA	NA	4.379	NA	NA
122116	2	32	4	4	3	1	164.148	67.9	25.2	87.8	0.797279	65	59	87	159	2.9	5.1	220	7.3	1	NA	NA	2	1	3	1	0	180	NA	0	0	1	1	0	0	0	0	0	0	NA	0	0	NA	5.87	0.81	NA	1.674	1.373	NA
118306	2	24	1	3	1	1	163.785	67.6	25.2	87.2	0.792707	NA	60	NA	156	2	7	237	7.3	1	NA	NA	2	1	1	2	0	240	NA	0	0	0	0	0	0	0	0	0	NA	NA	0	147.8	NA	5.6	2.29	NA	2.343	2.716	NA
116812	2	27	3	4	2	1	152.623	58.7	25.2	84	0.791048	77	56	102	173	1.6	5.4	251	7.5	1	NA	NA	2	1	3	2	0	600	NA	1	1	3	3	0	1	0	0	0	0	NA	0	0	NA	4.13	1.12	NA	1.768	0.79	NA
89684	2	42	2	4	1	1	157.485	62.5	25.2	85.1	0.788938	56	68	109	188	1.9	2.4	255	7	1	NA	NA	2	1	2	2	0	600	NA	0	0	0	0	0	0	1	0	0	0	NA	0	0	NA	1.88	5.45	NA	2.657	0.896	NA
92297	2	44	1	5	1	1	156.98	62.1	25.2	82.7	0.76792	NA	68	NA	165	1.6	2.8	240	6.4	3	NA	NA	2	1	3	2	0	600	NA	0	0	0	0	0	0	0	0	0	NA	NA	0	0	NA	1.49	4.4	NA	2.249	2.152	NA
123986	2	29	5	5	1	1	148.938	55.9	25.2	79.5	0.757874	100	40	113	173	3	5.3	384	7.1	3	NA	NA	2	1	1	2	0	300	NA	0	0	0	0	0	0	0	0	0	NA	NA	0	0	NA	2.4	2.53	NA	0.857	0.809	NA
110083	2	21	4	3	3	3	156.22	61.5	25.2	81.1	0.754893	NA	NA	NA	NA	NA	NA	NA	NA	3	NA	NA	2	1	1	2	0	480	NA	0	0	0	0	0	0	0	0	0	NA	NA	0	0	NA	1.48	1.99	NA	0.522	1.396	NA
110408	2	35	4	4	3	1	178.174	80	25.2	86	0.749565	NA	63	NA	215	1.7	5.9	227	6.8	1	NA	NA	2	1	1	2	0	300	NA	0	0	1	1	1	0	0	0	0	0	NA	30.9	NA	NA	2.87	NA	NA	1.562	NA	NA
117725	2	28	4	5	3	2	164.389	68.1	25.2	78.1	0.708675	36	52	66	125	1.3	4.4	202	7.6	1	NA	NA	2	1	2	2	0	360	NA	0	0	0	0	0	0	0	0	0	NA	NA	0	NA	NA	2.48	NA	NA	1.225	NA	NA
111208	2	36	5	5	1	2	154.996	60.3	25.1	96.6	0.905108	NA	46	NA	151	3.4	10.7	338	6.8	1	NA	NA	3	1	2	1	0	420	NA	0	0	0	0	0	0	0	0	0	NA	NA	0	0	NA	3.17	2.98	NA	1.073	1.267	NA
93297	2	39	1	4	1	1	154.353	59.8	25.1	95.6	0.897605	219	40	85	169	1.7	5.3	147	6.3	3	NA	NA	2	1	3	2	0	90	NA	0	0	0	0	0	0	0	0	0	NA	NA	0	0	NA	5.21	8.3	NA	1.543	2.694	NA
87772	2	36	1	2	1	1	155.382	60.6	25.1	95.2	0.890885	80	54	115	185	2.1	3.1	184	7.4	3	NA	NA	2	1	4	2	0	480	NA	0	0	3	0	2	0	0	0	0	0	NA	0	0	NA	5.96	5.11	NA	2.347	2.033	NA
92319	2	40	5	4	1	2	156.404	61.4	25.1	91.8	0.856255	59	57	124	193	2.4	3.1	148	6.9	3	NA	NA	2	1	2	1	1	360	NA	1	0	1	1	0	0	0	0	0	0	NA	0	0	NA	3.08	35.01	NA	3.803	2.339	NA
81604	2	29	4	4	3	1	166.76	69.8	25.1	93.8	0.847309	NA	41	NA	137	2.9	2.4	205	7.2	3	NA	NA	2	1	3	1	0	600	NA	0	3	0	3	3	3	3	3	1	2	NA	0	0	NA	0.82	0.37	NA	0.739	0.281	NA
79640	2	30	1	2	1	1	161.541	65.5	25.1	90.8	0.833351	NA	51	NA	172	1.9	3.6	293	7.2	3	NA	NA	2	1	2	2	0	180	NA	0	0	0	1	0	0	0	0	0	0	NA	0	0	NA	0.78	2.22	NA	1.499	1.326	NA
75137	2	30	1	2	1	1	161.665	65.6	25.1	90.2	0.827529	NA	62	NA	220	2.5	3.6	200	7.2	1	NA	NA	2	1	5	2	0	480	NA	1	0	1	3	0	0	1	0	0	0	NA	0	0	NA	5.56	0.96	NA	2.344	2.008	NA
123833	2	34	3	4	1	1	168.896	71.6	25.1	89.5	0.803336	NA	47	NA	243	1.6	4.7	332	7	0	NA	NA	2	1	1	2	0	180	NA	0	0	0	1	0	0	0	0	0	0	NA	0	0	NA	1.58	6.8	NA	1.354	1.348	NA
115055	2	38	1	1	1	1	151.618	57.7	25.1	84	0.795771	102	66	77	163	1.9	8.2	263	7.4	1	NA	NA	2	1	5	2	0	10	NA	1	1	2	3	1	0	1	0	0	0	NA	14.4	0	NA	1.78	14.05	NA	1.24	5.985	NA
80336	2	24	1	4	3	1	160.552	64.7	25.1	85.7	0.788964	141	57	76	161	3.7	4.3	333	7.6	1	NA	NA	2	1	2	2	0	240	NA	1	0	1	1	1	1	0	0	0	0	NA	0	0	NA	3.7	2.87	NA	0.898	1.152	NA
90403	2	23	3	4	1	1	168.068	70.9	25.1	86.5	0.778318	NA	73	NA	226	3.4	4.4	307	6.5	1	NA	NA	2	1	1	2	0	540	NA	2	2	1	3	1	2	1	1	0	1	NA	22.3	0	NA	8.38	2.9	NA	1.973	0.773	NA
75283	2	29	5	5	1	1	159.306	63.7	25.1	81.6	0.75415	NA	57	NA	168	2.1	4.8	198	7.1	1	NA	NA	2	1	2	1	0	600	NA	0	0	0	1	0	0	0	0	0	0	NA	0	0	NA	1.88	42.02	NA	2.608	5.438	NA
74050	2	44	3	4	3	1	162.157	66	25.1	82	0.751157	NA	53	NA	166	2.5	4.8	186	6.4	1	NA	NA	2	1	3	2	1	480	NA	0	0	2	0	0	0	1	0	0	0	NA	NA	NA	NA	NA	NA	NA	NA	NA	NA
78098	2	41	3	5	3	3	163.746	67.3	25.1	80	0.729271	NA	76	NA	148	1.7	2.5	240	7.1	0	NA	NA	2	1	4	1	0	360	NA	0	0	0	0	0	0	0	0	0	NA	NA	0	0	NA	1.26	4.53	NA	2.127	1.798	NA
121762	2	27	2	5	1	1	163.137	66.8	25.1	79	0.721499	NA	64	NA	169	2.6	4.7	346	NA	1	NA	NA	2	1	5	2	0	480	NA	0	0	1	1	1	1	0	0	0	1	NA	12.5	0	NA	6.05	3.91	NA	2.058	1.001	NA
76642	2	40	5	3	1	1	165.199	68.5	25.1	77.7	0.705182	31	62	58	126	1.3	2.5	133	6.9	1	NA	NA	2	1	2	2	0	300	NA	0	0	0	0	0	0	0	0	0	NA	NA	0	0	NA	9.45	7.42	NA	2.407	1.754	NA
79523	2	40	4	4	3	1	163.503	67.1	25.1	76.3	0.69606	21	61	72	137	1.2	1.6	259	7.7	1	NA	NA	2	1	1	2	0	240	NA	3	1	3	3	2	0	3	0	0	3	NA	17	0	NA	7.06	4.88	NA	2.592	2.527	NA
123423	2	36	5	1	1	1	155.949	60.8	25	90.9	0.851359	68	49	92	155	2.2	4.7	210	7.3	3	NA	NA	2	1	2	2	0	240	NA	0	0	0	0	0	0	0	0	0	NA	NA	0	0	NA	1.26	1.15	NA	0.853	1.285	NA
123692	2	33	5	1	1	1	151.129	57.1	25	88	0.837237	105	54	127	202	1.8	3.2	206	8	0	NA	NA	2	1	1	1	0	240	NA	0	0	0	0	0	0	0	0	0	NA	NA	NA	NA	NA	NA	NA	NA	NA	NA	NA
83174	2	44	5	5	1	2	155.306	60.3	25	88.4	0.829656	NA	62	NA	204	2.5	4.5	387	7	1	NA	NA	2	1	1	2	0	600	NA	0	0	0	0	0	0	0	0	0	NA	NA	18.5	NA	NA	11	NA	NA	2.08	NA	NA
112002	2	33	5	4	1	1	151.658	57.5	25	86.6	0.822481	64	53	70	136	1.9	3.9	276	7.4	3	NA	NA	2	1	1	2	0	240	NA	0	0	0	0	0	0	0	0	0	NA	NA	0	0	NA	6.12	3.17	NA	4.283	1.64	NA
112156	2	43	5	5	1	3	153.623	59	25	86.2	0.813428	202	38	126	204	2.4	1.9	330	7.4	1	NA	NA	2	1	3	2	0	480	NA	0	0	0	0	0	0	0	0	0	NA	NA	NA	NA	NA	NA	NA	NA	NA	NA	NA
113676	2	34	2	3	1	3	168.404	70.9	25	89.4	0.805751	NA	77	NA	195	1.9	4.8	242	7.3	1	NA	NA	2	1	3	1	0	120	NA	0	0	0	0	0	0	0	0	0	NA	NA	44.5	36.4	NA	3.97	2.41	NA	1.999	1.531	NA
76212	2	34	1	4	1	1	150.333	56.5	25	84.1	0.802248	NA	93	NA	246	2.6	5.1	160	7.3	1	NA	NA	2	1	3	1	0	120	NA	1	0	0	1	0	1	0	0	0	0	NA	9.4	0	NA	3.58	1.12	NA	1.535	1.349	NA
122097	2	38	3	4	2	1	164.438	67.6	25	87.2	0.795344	52	65	90	165	1.9	4.4	304	7.4	1	NA	NA	2	1	3	2	0	360	NA	0	0	1	1	0	0	0	0	0	0	NA	8	0	NA	4.18	4.65	NA	1.222	1.313	NA
75825	2	40	5	5	1	1	151.658	57.5	25	83.6	0.793989	NA	42	NA	167	1.7	3.8	287	7.7	1	NA	NA	2	1	3	2	0	30	NA	0	0	0	0	0	0	0	0	0	NA	NA	0	0	NA	1.92	3.56	NA	1.692	1.902	NA
117707	2	38	2	4	1	1	163.585	66.9	25	86.4	0.7901	NA	92	NA	188	1.9	3.7	226	7.2	1	NA	NA	2	1	2	2	0	120	NA	0	0	0	0	0	0	0	0	0	NA	NA	5.7	22.3	NA	2.1	1.1	NA	1.718	0.628	NA
90540	2	24	1	1	1	1	150.599	56.7	25	82.7	0.788197	256	38	61	150	2.9	3.2	144	7.1	3	NA	NA	2	1	3	2	0	120	NA	1	2	0	0	1	0	0	1	0	0	NA	0	0	NA	0.41	1.03	NA	1.247	0.556	NA
114222	2	42	1	2	1	1	150.997	57	25	81.8	0.778591	NA	64	NA	202	2.6	3.7	238	7.2	1	NA	NA	2	1	2	2	0	120	NA	0	0	0	0	1	0	0	0	0	0	NA	0	0	NA	0.86	2.04	NA	1.364	1.15	NA
124094	2	40	5	5	1	1	160.748	64.6	25	82.2	0.758296	NA	82	NA	163	2	5.1	225	6.9	1	NA	NA	2	1	2	2	0	180	NA	1	1	1	1	1	0	0	1	1	1	NA	0	NA	NA	1.76	NA	NA	1.472	NA	NA
121913	2	37	3	2	1	1	154.143	59.4	25	79.2	0.746111	NA	48	NA	143	1.5	4	233	6.6	0	NA	NA	2	1	4	2	0	180	NA	0	0	0	0	0	0	0	0	0	NA	NA	0	0	NA	3.77	2.97	NA	1.535	0.89	NA
115785	2	22	4	4	3	1	160.873	64.7	25	74.9	0.690686	41	50	53	111	1.9	1.9	262	7.1	1	NA	NA	2	1	1	2	0	120	NA	0	0	0	0	0	0	0	0	0	NA	NA	0	0	NA	0	0.9	NA	2.096	3.785	NA
119100	2	33	3	3	3	1	155.618	60.3	24.9	93.1	0.875227	NA	38	NA	225	3.3	5.4	245	6.6	1	NA	NA	2	1	3	1	1	360	NA	0	2	1	3	0	0	0	0	0	0	NA	0	0	NA	8.81	3.77	NA	3.13	0.661	NA
75745	2	44	5	5	1	1	167.907	70.2	24.9	93.2	0.843494	NA	57	NA	178	1.9	5.7	255	7.2	1	NA	NA	2	1	3	2	0	300	NA	0	0	0	0	0	0	0	0	0	NA	NA	2.3	0	NA	7.02	0.16	NA	2.199	0.55	NA
88230	2	42	3	4	1	1	151.432	57.1	24.9	88.1	0.83959	NA	69	NA	191	3.4	5.7	277	6.5	1	NA	NA	2	1	3	2	0	720	NA	0	0	0	2	0	0	0	0	0	0	NA	0	0	NA	6.8	3.57	NA	1.25	1.434	NA
78692	2	39	5	5	1	2	156.262	60.8	24.9	89.1	0.835896	105	49	108	178	1.9	3	310	6.4	1	NA	NA	2	1	3	1	0	720	NA	0	0	0	0	0	0	0	0	0	NA	NA	0	0	NA	1.09	2.38	NA	1.623	1.475	NA
93612	2	36	5	5	1	1	162.436	65.7	24.9	89	0.818934	378	45	63	184	1.6	4.1	210	7.6	3	NA	NA	2	1	2	2	0	180	NA	1	2	1	3	1	0	0	0	0	2	NA	0	0	NA	7	10.83	NA	2.99	2.133	NA
82762	2	26	5	2	1	1	154.452	59.4	24.9	86	0.811525	NA	58	NA	203	NA	NA	248	7.6	1	NA	NA	2	1	2	2	0	480	NA	0	0	0	0	0	0	0	0	0	NA	NA	0	0	NA	7.08	4.48	NA	1.35	1.601	NA
81625	2	41	2	3	1	1	159.442	63.3	24.9	86.5	0.80337	76	53	109	177	2.6	3	314	6.8	0	NA	NA	2	1	2	2	0	240	NA	0	0	0	0	0	0	0	0	0	NA	NA	0	0	NA	7.76	9.68	NA	4.101	5.877	NA
90361	2	22	3	4	3	1	158.05	62.2	24.9	85.4	0.796637	NA	89	NA	165	2	4.9	303	6.7	1	NA	NA	2	1	5	2	1	240	NA	0	0	0	0	0	0	0	0	0	NA	NA	22.3	0	NA	1.75	4.42	NA	1.225	1.453	NA
87459	2	31	1	1	2	1	140.71	49.3	24.9	79.2	0.783004	NA	NA	NA	NA	NA	NA	NA	NA	3	NA	NA	2	1	4	2	0	348	NA	3	0	0	0	0	0	0	0	0	0	NA	0	NA	NA	3.02	NA	NA	1.229	NA	NA
82957	2	38	2	4	2	1	155.618	60.3	24.9	81	0.761476	65	65	100	178	2.8	4.3	292	7	0	NA	NA	2	1	2	2	1	480	NA	0	0	0	0	0	0	0	0	0	NA	NA	0	0	NA	6.04	2.4	NA	2.352	0.953	NA
73924	2	39	3	5	1	3	166.224	68.8	24.9	82.4	0.749515	44	65	111	185	1.5	4.9	273	6.9	1	NA	NA	2	1	3	2	0	480	NA	0	0	0	1	0	0	0	0	0	0	NA	11.2	0	NA	9.12	10.47	NA	3.907	2.748	NA
86458	2	44	4	5	1	2	153.931	59	24.9	78.7	0.743896	NA	NA	NA	NA	1.7	2	223	6.6	1	NA	NA	2	1	4	2	1	600	NA	0	0	0	2	1	1	0	1	0	0	NA	0	0	NA	1.37	0.86	NA	0.713	0.565	NA
79455	2	37	2	4	1	3	161.195	64.7	24.9	79	0.729712	NA	44	NA	139	2.7	4.2	206	7	1	NA	NA	2	1	2	2	0	480	NA	0	0	0	0	1	0	0	0	0	0	NA	0	0	NA	11.84	3.63	NA	4.582	1.85	NA
123224	2	40	5	5	1	3	160.267	63.7	24.8	96.9	0.900052	NA	96	NA	216	3.1	3.5	240	7.4	1	NA	NA	2	1	6	2	0	420	NA	0	0	0	1	0	0	1	0	0	0	NA	0	NA	NA	2.04	NA	NA	2.007	NA	NA
92277	2	45	3	3	1	1	169.32	71.1	24.8	97	0.876562	97	90	83	192	1.9	4	243	7.4	1	NA	NA	2	1	2	2	1	120	NA	0	0	0	2	0	0	0	0	0	0	NA	0	38.1	NA	1.73	1.9	NA	1.615	0.497	NA
87742	2	41	2	4	2	1	160.393	63.8	24.8	92.2	0.85606	NA	47	NA	245	1.8	6.8	280	7.9	1	NA	NA	2	1	3	2	0	540	NA	1	1	1	1	0	0	1	0	0	1	NA	8	0	NA	2.22	1.78	NA	0.403	0.73	NA
80863	2	37	5	5	1	2	157.347	61.4	24.8	91.2	0.854931	NA	71	NA	209	1.7	2.8	220	6.8	1	NA	NA	2	1	2	2	0	600	NA	0	0	0	1	0	0	0	0	0	0	NA	0	0	NA	1.75	2.29	NA	1.585	0.987	NA
75149	2	39	4	2	1	1	158.623	62.4	24.8	91.3	0.852419	97	54	83	156	2.3	5.9	380	7	1	NA	NA	2	1	4	2	1	600	NA	0	0	0	0	0	0	0	0	0	NA	NA	0	74.3	NA	2.88	1.03	NA	0.613	0.678	NA
119613	2	28	3	3	3	1	165.466	67.9	24.8	89.9	0.821809	NA	54	NA	179	4.4	5	315	7.8	1	NA	NA	2	1	2	2	1	120	NA	1	1	3	2	1	1	2	1	0	1	NA	0	9.3	NA	3.71	1.76	NA	0.912	1.457	NA
122301	2	39	4	4	3	3	171.097	72.6	24.8	90.2	0.810869	46	72	98	179	1.7	2.5	233	7.3	1	NA	NA	2	1	9	2	0	180	NA	1	0	2	1	0	0	0	0	0	0	NA	14.9	0	NA	5.33	4.26	NA	1.125	0.928	NA
77091	2	31	1	3	1	3	161.52	64.7	24.8	69.3	0.641188	NA	68	NA	172	1.6	5.3	201	7.8	1	NA	NA	2	1	3	2	0	240	NA	0	0	0	0	0	0	0	0	0	NA	NA	0	0	NA	2.86	6.35	NA	1.118	2.481	NA
117394	2	24	5	3	1	3	159.96	63.2	24.7	102.2	0.952755	206	48	149	238	1.9	4.1	132	6	3	NA	NA	2	1	3	1	0	300	NA	0	0	1	1	1	0	0	0	0	0	NA	0	NA	NA	4.89	NA	NA	2.138	NA	NA
85222	2	35	3	4	1	1	164.821	67.1	24.7	95	0.872474	NA	41	NA	156	2.5	4	229	7.7	3	NA	NA	2	1	3	2	0	480	NA	3	1	0	1	0	1	0	0	0	0	NA	0	0	NA	1.36	4.35	NA	1.909	1.446	NA
80027	2	32	1	3	3	1	153.633	58.3	24.7	90.2	0.858023	190	59	112	209	2.3	4.2	285	7.5	1	NA	NA	2	1	2	2	0	240	NA	0	0	1	0	0	0	0	0	0	0	NA	0	0	NA	6.27	3.93	NA	1.172	1.419	NA
90287	2	36	4	4	2	1	169.901	71.3	24.7	94.2	0.852095	67	62	86	161	1.5	3.5	212	6.6	1	NA	NA	2	1	5	2	0	360	NA	0	0	0	0	0	0	0	0	0	NA	NA	0	0	NA	2.04	11.56	NA	0.999	2.4	NA
115205	2	31	3	4	1	1	158.944	62.4	24.7	90.2	0.843568	NA	37	NA	194	3.2	7.7	250	6.8	1	NA	NA	2	1	3	1	0	240	NA	0	0	0	0	0	0	0	0	0	NA	NA	0	0	NA	5.71	4.87	NA	1.987	1.438	NA
76204	2	45	3	5	1	1	159.326	62.7	24.7	90.2	0.842557	NA	42	NA	200	2.4	3.4	176	6.9	1	NA	NA	2	1	7	2	1	300	NA	0	0	0	0	0	0	0	0	0	NA	NA	0	0	NA	9.8	7.21	NA	6.253	4.641	NA
83962	2	28	4	5	3	1	166.41	68.4	24.7	88	0.804319	NA	58	NA	160	2.7	3.3	276	7.2	1	NA	NA	2	1	4	2	0	480	NA	0	0	1	0	0	0	0	0	0	0	NA	0	0	NA	6.55	2.62	NA	2.033	1.402	NA
80873	2	36	5	5	1	2	150.034	55.6	24.7	81.9	0.78836	68	60	97	171	1.7	3.9	261	7.2	1	NA	NA	2	1	1	2	0	480	NA	1	0	3	2	0	0	3	0	0	0	NA	0	0	NA	3.35	2.34	NA	1.129	1.688	NA
[truncated: 779 more rows]
[truncated: 67 more columns]

## Sheet: Sheet1
	SLEEP.DISORDER
	0
	0
	0
	0
	0
	0
	0
	0
	0
	0
	0
	0
	0
	0
	0
	0
	0
	0
	0
	0
	0
	0
	0
	0
	0
	0
	0
	0
	0
	0
	0
	0
	0
	0
	0
	0
	0
	0
	0
	0
	0
	0
	0
	0
	0
	0
	0
	0
	0
	0
	0
	0
	0
	0
	0
	0
	0
	0
	0
	0
	0
	0
	0
	0
	0
	0
	0
	0
	0
	0
	0
	0
	0
	0
	0
	0
	0
	0
	0
	0
	0
	0
	0
	0
	0
	0
	0
	0
	0
	0
	0
	0
	0
	0
	0
	0
	0
	0
	0
	0
	0
	0
	0
	0
	0
	0
	0
	0
	0
	0
	0
	0
	0
	0
	0
	0
	0
	0
	0
	0
	0
	0
	0
	0
	0
	0
	0
	0
	0
	0
	0
	0
	0
	0
	0
	0
	0
	0
	0
	0
	0
	0
	0
	0
	0
	0
	0
	0
	0
	0
	0
	0
	0
	0
	0
	0
	0
	0
	0
	0
	0
	0
	0
	0
	0
	0
	0
	0
	0
	0
	0
	0
	0
	0
	0
	0
	0
	0
	0
	0
	0
	0
	0
	0
	0
	0
	0
	0
	0
	0
	0
	0
	0
	0
	0
	0
	0
	0
	0
	0
	0
	0
	0
	0
	0
	0
	0
	0
	0
	0
	0
	0
	0
	0
	0
	0
	0
	0
	0
	0
	0
	0
	0
	0
	0
	0
	0
	0
	0
	0
	0
	0
	0
	0
	0
	0
	0
	0
	0
	0
	0
	0
	0
	0
	0
	0
	0
	0
	0
	0
	0
	0
	0
	0
	0
	0
	0
	0
	0
	0
	0
	0
	0
	0
	0
	0
	0
	0
	0
	0
	0
	0
	0
	0
	0
	0
	0
	0
	0
	0
	0
	0
	0
	0
	0
	0
	0
	0
	0
	0
	0
	0
	0
	0
	0
	0
	0
	0
	0
	0
	0
	0
	0
	0
	0
	0
	0
	0
	0
	0
	0
	0
	0
	0
	0
	0
	0
	0
	0
	0
	0
	0
	0
	0
	0
	0
	0
	0
	0
	0
	0
	0
	0
	0
	0
	0
	0
	0
	0
	0
	0
	0
	0
	0
	0
	0
	0
	0
	0
	0
	0
	0
	0
	0
	0
	0
	0
	0
	0
	0
	0
	0
	0
	0
	0
	0
	0
	0
	0
	0
	0
	0
	0
	0
	0
	0
	0
	0
	0
	0
	0
	0
	0
	0
	0
	0
	0
	0
	0
	0
	0
	0
	0
	0
	0
	0
	0
	0
	0
	0
	0
	0
	0
	0
	0
	0
	0
	0
	0
	0
	0
	0
	0
	0
	0
	0
	0
	0
	0
	0
	0
	0
	0
	0
	0
	0
	0
	0
	0
	0
	0
	0
	0
	0
	0
	0
	0
	0
	0
	0
	0
	0
	0
	0
	0
	0
	0
	0
	0
	0
	0
	0
	0
	0
	0
	0
	0
	0
	0
	0
	0
	0
	0
	0
	0
	0
	0
	0
	0
	0
	0
	0
	0
	0
	0
	0
	0
	0
	0
	0
	0
	0
	0
	0
	0
	0
	0
	0
	0
	0
	0
	0
	0
	0
	0
	0
	0
	0
	0
	0
	0
	0
	0
	0
	0
	0
	0
	0
	0
	0
	0
	0
	0
	0
	0
	0
	0
	0
	0
	0
	0
	0
	0
	0
	0
	0
	0
	0
	0
	0
	0
	0
	0
	0
	0
	0
	0
	0
	0
	0
	0
	0
	0
	0
	0
	0
	0
	0
	0
	0
	0
	0
	0
	0
	0
	0
	0
	0
	0
	0
	0
	0
	0
	0
	0
	0
	0
	0
	0
	0
	0
	0
	0
	0
	0
	0
	0
	0
	0
	0
	0
	0
	0
	0
	0
	0
	0
	0
	0
	0
	0
	0
	0
	0
	0
	0
	0
	0
	0
	0
	0
	0
	0
	0
	0
	0
	0
	0
	0
	0
	0
	0
	0
	0
	0
	0
	0
	0
	0
	0
	0
	0
	0
	0
	0
	0
	0
	0
	0
	0
	0
	0
	0
	0
	0
	0
	0
	0
	0
	0
	0
	0
	0
	0
	0
	0
	0
	0
	0
	0
	0
	0
	0
	0
	0
	0
	0
	0
	0
	0
	0
	0
	0
	0
	0
	0
	0
	0
	0
	0
	0
	0
	0
	0
	0
	0
	0
	0
	0
	0
	0
	0
	0
	0
	0
	0
	0
	0
	0
	0
	0
	0
	0
	0
	0
	0
	0
	0
	0
	0
	0
	0
	0
	0
	0
	0
	0
	0
	0
	0
	0
	0
	0
	0
	0
	0
	0
	0
	0
	0
	0
	0
	0
	0
	0
	0
	0
	0
	0
	0
	0
	0
	0
	0
	0
	0
	0
	0
	0
	0
	0
	0
	0
	0
	0
	0
	0
	0
	0
	0
	0
	0
	0
	0
	0
	0
	0
	0
	0
	0
	0
	0
	0
	0
	0
	0
	0
	0
	0
	0
	0
	0
	0
	0
	0
	0
	0
	0
	0
	0
	0
	0
	0
	0
	0
	0
	0
	0
	0
	0
	0
	0
	0
	0
	0
	0
	0
	0
	0
	0
	0
	0
	0
	0
	0
	0
	0
	0
	0
	0
	0
	0
	0
	0
	0
	0
	0
	0
	0
	0
	0
	0
	0
	0
	0
	0
	0
	0
	0
	0
	0
	0
	0
	0
	0
	0
	0
	0
	0
	0
	0
	0
	0
	0
	0
	0
	0
	0
	0
	0
	0
	0
	0
	0
	0
	0
	0
	0
	0
	0
	0
	0
	0
	0
	0
	0
	0
	0
	0
	0
	0
	0
	0
	0
	0
	0
	0
	0
	0
	0
	0
	0
	0
	0
	0
	0
	0
	0
	0
	0
	0
	0
	0
	0
	0
	0
	0
	0
	0
	0
	0
	0
	0
	0
	0
	0
	0
	0
	0
	0
	0
	0
	0
	0
	0
	0
	0
	0
	0
	0
	0
	0
	0
	0
	0
	0
	0
	0
	0
	0
	0
	0
	0
	0
	0
	0
	0
	0
	0
	0
	0
	0
	0
	0
	0
	0
	0
	0
	0
	0
	0
	0
	0
	0
	0
	0
	0
	0
	0
	0
	0
	0
	0
	0
	0
	0
	0
	0
	0
	0
	0
	0
	0
	0
	0
	0
	0
	0
	0
	0
	0
	0
	0
	0
	0
	0
	0
	0
	0
	0
	0
	0
	0
	0
	0
	0
	0
	0
	0
	0
	0
	0
	0
	0
	0
	0
	0
	0
	0
	0
	0
	0
	0
	0
	0
	0
	0
	0
	0
	0
	0
	0
	0
	0
	0
	0
	0
	0
	0
	0
	0
	0
	0
	0
	0
	0
	0
	0
	0
	0
	0
	0
	0
	0
	0
	0
	0
	0
	0
	0
	0
	0
	0
	0
	0
	0
	0
	0
	0
	0
	0
	0
	0
	0
	0
	0
	0
	0
	0
	0
	0
	0
	0
	0
	0
	0
	0
	0
	0
	0
	0
	0
	0
	0
	0
	0
	0
	0
	0
	0
	0
	0
	0
	0
	0
	0
	0
	0
	0
	0
	0
	0
	0
	0
	0
	0
	0
	0
	0
	0
	0
	0
	0
	0
	0
	0
	0
	0
	0
	0
	0
	0
	0
	0
	0
	0
	0
	0
	0
	0
	0
	0
	0
	0
	0
	0
	0
	0
	0
	0
	0
	0
	0
	0
	0
	0
	0
	0
	0
	0
	0
	0
	0
	0
	0
	0
	0
	0
	0
	0
	0
	0
	0
	0
	0
	0
	0
	0
	0
	0
	0
	0
	0
	0
	0
	0
	0
	0
	0
	0
	0
	0
	0
	0
	0
	0
	0
	0
	0
	0
	0
	0
	0
	0
	0
	0
	0
	0
	0
	0
	0
	0
	0
	0
	0
	0
	0
	0
	0
	0
	0
	0
	0
	0
	0
	0
	0
	0
	0
	0
	0
	0
	0
	0
	0
	0
	0
	0
	0
	0
	0
	0
	0
	0
	0
	0
	0
	0
	0
	0
	0
	0
	0
	0
	0
	0
	0
	0
	0
	0
	0
	0
	0
	0
	0
	0
	0
	0
	0
	0
	0
	0
	0
	0
	0
	0
	0
	0
	0
	0
	0
	0
	0
	0
	0
	0
	0
	0
	0
	0
	0
	0
	0
	0
	0
	0
	0
	0
	0
	0
	0
	0
	0
	0
	0
	0
	0
	0
	0
	0
	0
	0
	0
	0
	0
	0
	0
	0
	0
	0
	0
	0
	0
	0
	0
	0
	0
	0
	0
	0
	0
	0
	0
	0
	0
	0
	0
	0
	0
	0
	0
	0
	0
	0
	0
	0
	0
	0
	0
	0
	0
	0
	0
	0
	0
	0
	0
	0
	0
	0
	0
	0
	0
	0
	0
	0
	0
	0
	0
	0
	0
	0
	0
	0
	0
	0
	0
	0
	0
	0
	0
	0
	0
	0
	0
	0
	0
	0
	0
	0
	0
	0
	0
	0
	0
	0
	0
	0
	0
	0
	0
	0
	0
	0
	0
	0
	0
	0
	0
	0
	0
	0
	0
	0
	0
	0
	0
	0
	0
	0
	0
	0
	0
	0
	0
	0
	0
	0
	0
	0
	0
	0
	0
	0
	0
	0
	0
	0
	0
	0
	0
	0
	0
	0
	0
	0
	0
	0
	0
	0
	0
	0
	0
	0
	0
	0
	0
	0
	0
	0
	0
	0
	0
	0
	0
	0
	0
	0
	0
	0
	0
	0
	0
	0
	0
	0
	0
	0
	0
	0
	0
	0
	0
	0
	0
	0
	0
	0
	0
	0
	0
	0
	0
	0
	0
	0
	0
	0
	0
	0
	0
	0
	0
	0
	0
	0
	0
	0
	0
	0
	0
	0
	0
	0
	0
	0
	0
	0
	0
	0
	0
	0
	0
	0
	0
	0
	0
	0
	0
	0
	0
	0
	0
	0
	0
	0
	0
	0
	0
	0
	0
	0
	0
	0
	0
	0
	0
	0
	0
	0
	0
	0
	0
	0
	0
	0
	0
	0
	0
	0
	0
	0
	0
	0
	0
	0
	0
	0
	0
	0
	0
	0
	0
	0
	0
	0
	0
	0
	0
	0
	0
	0
	0
	0
	0
	0
	0
	0
	0
	0
	0
	0
	0
	0
	0
	0
	0
	0
	0
	0
	0
	0
	0
	0
	0
	0
	0
	0
	0
	0
	0
	0
	0
	0
	9
	2
	2
	2
	2
	2
	2
	2
	2
	2
	2
	2
	2
	2
	2
	2
	2
	2
	2
	2
	2
	2
	2
	2
	2
	2
	2
	2
	2
	2
	2
	2
	2
	2
	2
	2
	2
	2
	2
	2
	2
	2
	2
	2
	2
	2
	2
	2
	2
	2
	2
	2
	2
	2
	2
	2
	2
	2
	2
	2
	2
	2
	2
	2
	2
	2
	2
	2
	2
	2
	2
	2
	2
	2
	2
	2
	2
	2
	2
	2
	2
	2
	2
	2
	2
	2
	2
	2
	2
	2
	2
	2
	2
	2
	2
	2
	2
	2
	2
	2
	2
	2
	2
	2
	2
	2
	2
	2
	2
	2
	2
	2
	2
	2
	2
	2
	2
	2
	2
	2
	2
	2
	2
	2
	2
	2
	2
	2
	2
	2
	2
	2
	2
	2
	2
	2
	2
	2
	2
	2
	2
	2
	2
	2
	2
	2
	2
	2
	2
	2
	2
	2
	2
	2
	2
	2
	2
	2
	2
	2
	2
	2
	2
	2
	2
	2
	2
	2
	2
	2
	2
	2
	2
	2
	2
	2
	2
	2
	2
	2
	2
	2
	2
	2
	2
	2
	2
	2
	2
	2
	2
	2
	2
	2
	2
	2
	2
	2
	2
	2
	2
	2
	2
	2
	2
	2
	2
	2
	2
	2
	2
	2
	2
	2
	2
	2
	2
	2
	2
	2
	2
	2
	2
	2
	2
	2
	2
	2
	2
	2
	2
	2
	2
	2
	2
	2
	2
	2
	2
	2
	2
	2
	2
	2
	2
	2
	2
	2
	2
	2
	2
	2
	2
	2
	2
	2
	2
	2
	2
	2
	2
	2
	2
	2
	2
	2
	2
	2
	2
	2
	2
	2
	2
	2
	2
	2
	2
	2
	2
	2
	2
	2
	2
	2
	2
	2
	2
	2
	2
	2
	2
	2
	2
	2
	2
	2
	2
	2
	2
	2
	2
	2
	2
	2
	2
	2
	2
	2
	2
	2
	2
	2
	2
	2
	2
	2
	2
	2
	2
	2
	2
	2
	2
	2
	2
	2
	2
	2
	2
	2
	2
	2
	2
	2
	2
	2
	2
	2
	2
	2
	2
	2
	2
	2
	2
	2
	2
	2
	2
	2
	2
	2
	2
	2
	2
	2
	2
	2
	2
	2
	2
	2
	2
	2
	2
	2
	2
	2
	2
	2
	2
	2
	2
	2
	2
	2
	2
	2
	2
	2
	2
	2
	2
	2
	2
	2
	2
	2
	2
	2
	2
	2
	2
	2
	2
[truncated: 780 more rows]
